# Supplementary material for: Gene Annotation and Drug Target Discovery in Candida albicans with a Tagged Transposon Mutant Collection
Source: PLoS Pathog. 2010 Oct 7;6(10):e1001140. doi: 10.1371/journal.ppat.1001140 (PMC2951378; doi:10.1371/journal.ppat.1001140)
Supplement: Table S3 — Regression slopes and adjusted p-values for all strains (1.09 MB XLS) [file ppat.1001140.s012.xls]

## Sheet: S3
Table S3. Regression slopes and adjusted p-values for all strains.
C.albicans ORF	C. albicans gene	YPD regression slope	YPD adjusted p-value	SC regression slope	SC adjusted p-value	YNB regression slope	YNB adjusted p-value	SLAD regression slope	SLAD adjusted p-value	Description
CaalfMp01	COX2	-0.317731	0.00717809	-0.0629395	0.446782	-0.0109094	0.205337	-0.00541406	0.52144	Subunit II of cytochrome c oxidase, which is the terminal member of the mitochondrial inner membrane electron transport chain; one of three mitochondrially-encoded subunits
CaalfMp02	NAD6	0.00700608	0.83475	-0.00216262	0.964502	-0.00761437	0.80993	-0.000668672	0.982632	Subunit 6 of NADH:ubiquinone oxidoreductase (NADH:ubiquinone dehydrogenase), a multisubunit enzyme complex (complex I) of the mitochondrial inner membrane that catalyzes the first step in mitochondrial respiration
CaalfMp03	NAD1	-0.00660173	0.919281	-0.0079585	0.926824	-0.0276689	0.711817	-0.0329552	0.511294	Subunit 6 of NADH:ubiquinone oxidoreductase (NADH:ubiquinone dehydrogenase), a multisubunit enzyme complex (complex I) of the mitochondrial inner membrane that catalyzes the first step in mitochondrial respiration
CaalfMp06	ATP6	-0.0818017	0.0648121	-0.034473	0.688974	-0.0351847	0.618648	0.015512	0.868155	Subunit 6 of the F0 sector of mitochondrial F1F0 ATP synthase, which is a large, evolutionarily conserved enzyme complex required for ATP synthesis
CaalfMp10	NAD3	0.00615625	0.38018	-0.0039857	0.791433	0.007627	0.269409	0.00534417	0.275838	Subunit 3 of NADH:ubiquinone oxidoreductase (NADH:ubiquinone dehydrogenase), a multisubunit enzyme complex (complex I) of the mitochondrial inner membrane that catalyzes the first step in mitochondrial respiration
CaalfMp13	NAD5	-0.379664	0.0317071	-0.225526	0.331957	-0.167921	0.341833	-0.265532	0.12331	Subunit 5 of NADH:ubiquinone oxidoreductase (NADH:ubiquinone dehydrogenase), a multisubunit enzyme complex (complex I) of the mitochondrial inner membrane that catalyzes the first step in mitochondrial respiration
CaalfMp14	NAD4	-0.0139909	0.0657908	-0.018614	0.127184	-0.0434342	0.0748262	-0.0602915	0.00498817	Subunit 4 of NADH:ubiquinone oxidoreductase (NADH:ubiquinone dehydrogenase), a multisubunit enzyme complex (complex I) of the mitochondrial inner membrane that catalyzes the first step in mitochondrial respiration
orf19.100	orf19.100	-0.0148744	0.019275	-0.0152349	0.248199	-0.0095839	0.147043	-0.00508617	0.16095	Predicted ORF in Assemblies 19, 20 and 21
orf19.1002	orf19.1002	-0.00393829	0.852999	0.000665494	0.984633	-0.00289275	0.839614	-0.00875983	0.588675	Predicted ORF in Assemblies 19, 20 and 21; possibly spurious ORF (Annotation Working Group prediction)
orf19.1005	orf19.1005	0.00520908	0.0862024	0.00255934	0.720057	0.00382521	0.207064	0.0064681	0.327422	Predicted ORF in Assemblies 19, 20 and 21; transcription is upregulated in both intermediate and mature biofilms
orf19.1007	orf19.1007	-0.00366361	0.330426	-0.00178648	0.682876	-0.002203	0.651205	-0.00209227	0.59408	Putative transcription factor with bZIP DNA-binding motif
orf19.1010	MNT3	-0.00094049	0.850657	0.00281136	0.736911	-0.000409113	0.950671	0.0030339	0.523403	Protein with similarity to mannosyltransferases; transcription is elevated in cyr1, chk1, nik1, and sln1 homozygous null mutants; fungal-specific (no human or murine homolog)
orf19.1011	orf19.1011	0.00178569	0.895124	0.00784936	0.277264	-0.00011908	0.990141	-0.00753726	0.632648	Predicted ORF in Assemblies 19, 20 and 21
orf19.1012	orf19.1012	0.0109051	0.0960902	0.00630705	0.108851	0.00381175	0.370628	0.00754926	0.0833176	Predicted ORF in Assemblies 19, 20 and 21
orf19.102	orf19.102	-0.00350087	0.329295	-0.00177444	0.892387	-0.00292532	0.577962	0.00402969	0.705084	Predicted ORF in Assemblies 19, 20 and 21; possibly spurious ORF (Annotation Working Group prediction)
orf19.1026	orf19.1026	0.00370726	0.196658	0.00291363	0.435187	0.000610362	0.820471	0.00418499	0.157632	Predicted ORF in Assemblies 19, 20 and 21
orf19.103	KAR5	0.00938687	0.661373	0.00490673	0.893794	-0.0256524	0.270349	0.00158752	0.974183	Protein of unknown function; induced by alpha factor
orf19.1031	HMG1	0.0130622	0.126959	0.0112157	0.247444	0.0139012	0.155492	-0.00388048	0.844078	HMG-CoA reductase; enzyme of sterol pathway; inhibited by lovastatin; gene not transcriptionally regulated in response to lovastatin and fluconazole
orf19.1033	STR2	0.00982166	0.387398	-0.0124746	0.631724	0.00996299	0.358391	0.0165508	0.0799698	Protein not essential for viability; similar to S. cerevisiae Str2p, which is cystathionine gamma-synthase involved in sulfur metabolism
orf19.1035	WAR1	-0.00162826	0.789765	0.00116099	0.926824	-0.000433224	0.950046	0.00604864	0.618624	Predicted zinc cluster protein involved in resistance to weak organic acids; has similarity to S. cerevisiae War1p, which is a transcription factor involved in the regulation of weak acid stress response genes
orf19.1036	MNS1	0.00616935	0.181135	0.00719445	0.418275	0.00808271	0.163559	0.00992677	0.187529	Alpha-1,2-mannosidase; ER form is converted by Kex2p to a cytosolic form; processes Man9GlcNAc2 to Man8GlcNAc2 isomer B; member of endoplasmic-reticulum localized glycosyl hydrolase family 47
orf19.1041	orf19.1041	-0.252039	0.0899215	-0.245114	0.162128	-0.261364	0.0986619	-0.228035	0.161114	Predicted ORF in Assemblies 19, 20 and 21
orf19.1042	POR1	0.00460015	0.227997	0.00178868	0.528294	0.000646171	0.86433	0.0035776	0.174535	Mitochondrial outer membrane porin; in detergent-resistant membrane fraction (possible lipid raft component); antigenic in human, mouse; flucytosine-, macrophage-, farnesol- induced; fluconazole, caspofungin repressed
orf19.1043	orf19.1043	0.00289202	0.737504	-0.00202573	0.832288	0.00861758	0.344304	0.000522471	0.952372	Predicted ORF in Assemblies 19, 20 and 21
orf19.1049	orf19.1049	0.000264969	0.955765	0.007485	0.716535	-0.0021786	0.804738	-0.00887819	0.470991	Predicted ORF in Assemblies 19, 20 and 21; expression upregulated during planktonic growth
orf19.1050	orf19.1050	-0.00677158	0.228152	0.00962852	0.287124	0.00358417	0.252441	0.00635611	0.433138	Predicted ORF in Assemblies 19, 20 and 21; possibly spurious ORF (Annotation Working Group prediction)
orf19.1051	HTA2	0.00551319	0.120882	-0.00487933	0.370455	0.00190325	0.703539	0.0100489	0.0342059	Protein described as histone H2A; farnesol regulated; transcription is downregulated in both intermediate and mature biofilms
orf19.1053	orf19.1053	0.00277405	0.438382	0.00403149	0.380458	0.00223788	0.253574	0.00318934	0.25613	Predicted ORF in Assemblies 19, 20 and 21
orf19.1054	orf19.1054	-0.0289729	0.331969	0.0208967	0.122951	-0.00935984	0.440419	-6.57622e-05	0.997695	Predicted ORF in Assemblies 19, 20 and 21; possibly spurious ORF (Annotation Working Group prediction)
orf19.1057	orf19.1057	0.0217103	0.578639	-0.0610948	0.298897	-0.199573	0.211071	-0.122386	0.326437	Predicted ORF in Assemblies 19, 20 and 21
orf19.1062	orf19.1062	-0.00692751	0.403364	0.00802053	0.199291	-0.000188465	0.975061	0.00826735	0.417232	Predicted ORF in Assemblies 19, 20 and 21
orf19.1066	orf19.1066	-0.00110201	0.826599	0.0041013	0.155812	-8.7876e-06	0.998538	-0.00490738	0.320588	Predicted ORF in Assemblies 19, 20 and 21
orf19.1075	orf19.1075	0.0046685	0.338532	0.00555723	0.147088	-0.000264679	0.975163	0.00112664	0.825815	Predicted ORF in Assemblies 19, 20 and 21; possibly spurious ORF (Annotation Working Group prediction)
orf19.1080	orf19.1080	-0.180136	0.0703301	-0.196422	0.165325	-0.173785	0.236651	-0.177688	0.072644	Predicted ORF in Assemblies 19, 20 and 21; possibly spurious ORF (Annotation Working Group prediction)
orf19.1082	orf19.1082	0.00192168	0.927242	-0.00527543	0.679602	0.0106045	0.237074	0.00115076	0.940715	Predicted ORF in Assemblies 19, 20 and 21
orf19.1082.1	orf19.1082.1	0.00094395	0.952074	0.00540395	0.7148	-4.768e-05	0.996488	-0.0138514	0.358709	ORF Predicted by Annotation Working Group
orf19.1083	orf19.1083	0.00968244	0.21884	0.000210086	0.975529	0.00601559	0.263977	0.00422966	0.58459	Predicted ORF in Assemblies 19, 20 and 21; macrophage-induced gene; possibly spurious ORF (Annotation Working Group prediction)
orf19.1084	CDC39	-0.00333795	0.646793	0.00366612	0.616621	-0.0118733	0.0994568	-0.0218075	0.3783	Protein similar to S. cerevisiae Cdc39p, which is part of the CCR4-NOT transcription regulatory complex; transposon mutation affects filamentous growth
orf19.1085	orf19.1085	-0.00130163	0.421539	-0.00123944	0.804277	-0.00107131	0.708119	0.000421721	0.876618	Predicted ORF in Assemblies 19, 20 and 21
orf19.1086	orf19.1086	0.0097137	0.0501834	0.00147557	0.780761	0.00836084	0.160468	0.011502	0.0511042	Predicted ORF in Assemblies 19, 20 and 21
orf19.1091	orf19.1091	0.00443883	0.222404	0.00204487	0.669125	0.00395744	0.174703	0.00574003	0.0918648	Putative ortholog of S. cerevisiae Nop8p, which is a nucleolar protein required for 60S ribosomal subunit biogenesis
orf19.1092	orf19.1092	0.00808432	0.179464	0.00379268	0.383077	0.00510654	0.331534	0.00395769	0.237403	Predicted ORF in Assemblies 19, 20 and 21
orf19.1093	FLO8	-0.0085448	0.27889	-0.00317306	0.783114	-0.006256	0.272252	0.000451033	0.974413	Transcription factor; required for wild-type hyphal formation; regulates hyphal gene expression; required for virulence in mouse systemic infection; binds Efg1p; binds Mss11p via LisH motif; has LUFS domain; ortholog of S. cerevisiae Flo8p
orf19.1097	ALS2	0.00807118	0.473783	-0.0178551	0.27336	0.000581199	0.944035	0.0114059	0.144635	ALS family protein; role in adhesion, biofilm formation, germ tube induction; expressed at infection of human buccal epithelial cells; putative GPI-anchor; induced by ketoconazole, low iron and at cell wall regeneration; regulated by Sfu1p
orf19.1105	orf19.1105	0.0162642	0.0579704	-0.012181	0.555914	0.018167	0.169464	-0.00149343	0.948996	Predicted ORF in Assemblies 19, 20 and 21; possibly spurious ORF (Annotation Working Group prediction)
orf19.1105.2	PGA56	0.00098843	0.891915	0.00344527	0.35464	-0.00143306	0.690623	0.00373065	0.352194	Regulator of sorbose utilization; putative GPI-anchor; predicted helix-loop helix domain; hyphal induced; induced during cell wall regeneration; shows colony morphology-related gene regulation by Ssn6p; transcription activated by Tbf1p
orf19.1105.3	orf19.1105.3	-0.138337	0.00196037	-0.149411	0.0161587	-0.166606	0.00353226	-0.229001	0.0558366	ORF Predicted by Annotation Working Group
orf19.1106	orf19.1106	0.000512717	0.936848	-0.000658098	0.935451	-0.00213133	0.680073	0.000653427	0.940715	Predicted ORF in Assemblies 19, 20 and 21; shows Mob2p-dependent hyphal regulation; fluconazole-induced
orf19.1107	orf19.1107	0.0012038	0.740458	0.000824993	0.886968	-2.15128e-05	0.995122	0.00526902	0.413252	Predicted ORF in Assemblies 19, 20 and 21
orf19.1108	HAM1	-0.000859304	0.665426	-0.000424759	0.952607	0.00220723	0.57398	-0.00246528	0.527975	Predicted ORF in Assemblies 19, 20 and 21; caspofungin repressed; regulated by Gcn2p and Gcn4p
orf19.1111	orf19.1111	0.00598199	0.578825	-0.0191319	0.508352	0.00182915	0.964534	0.00995965	0.658733	Predicted ORF in Assemblies 19, 20 and 21
orf19.1112	BUD7	-0.00167217	0.770765	-0.00437285	0.509849	0.0112505	0.0971721	-0.0049765	0.225276	Predicted ORF in Assemblies 19, 20 and 21; fungal-specific (no human or murine homolog)
orf19.1114	orf19.1114	0.0040864	0.308276	0.000178518	0.971922	-0.000609721	0.903509	0.00195522	0.740063	Predicted ORF in Assemblies 19, 20 and 21
orf19.1117	orf19.1117	-0.00511192	0.305748	0.00682188	0.288949	-0.000384856	0.955069	0.00406293	0.291383	Predicted ORF in Assemblies 19, 20 and 21; similar to Candida boidinii formate dehydrogenase; virulence-group-correlated expression
orf19.1121	orf19.1121	-0.00534294	0.507121	0.00929402	0.126408	0.000204434	0.964819	-0.00222393	0.675548	Predicted ORF in Assemblies 19, 20 and 21
orf19.1124	orf19.1124	-0.00501376	0.700746	-0.00339493	0.881609	-0.00152032	0.891706	0.00713104	0.702784	Predicted ORF in Assemblies 19, 20 and 21
orf19.1124.2	orf19.1124.2	-0.00277239	0.726221	0.00545031	0.309715	0.00379557	0.340546	0.00209929	0.844078	Predicted ORF in Assemblies 19, 20 and 21
orf19.1133	MSB1	0.00397765	0.318103	0.00860625	0.161622	0.00560344	0.0610342	0.00577647	0.188732	Predicted ORF in Assemblies 19, 20 and 21; expression in S. cerevisiae flo8 and flo11 mutants suggests a role in regulation of adhesion factors
orf19.1135	CAS1	0.00054754	0.953509	-0.00677407	0.796812	0.00100722	0.929631	0.00513664	0.306116	Putative transcription factor with beta-barrel DNA-binding motif; mutation causes marginal increase in caspofungin sensitivity
orf19.1139	orf19.1139	0.00493581	0.202143	0.00389966	0.583972	0.000717989	0.918367	0.00467521	0.18537	Predicted ORF in Assemblies 19, 20 and 21
orf19.114	orf19.114	0.00334992	0.449135	0.00103483	0.935451	0.00630144	0.177327	0.00663182	0.072644	Predicted ORF in Assemblies 19, 20 and 21
orf19.1142	orf19.1142	-0.00171408	0.519796	0.00231294	0.443179	0.00644911	0.144198	-0.000820346	0.868155	Predicted ORF in Assemblies 19, 20 and 21; transcription is induced in response to alpha pheromone in SpiderM medium
orf19.1143	orf19.1143	-0.00494188	0.595153	0.00190785	0.495247	0.00381907	0.163089	0.00107711	0.684129	Predicted ORF in Assemblies 19, 20 and 21
orf19.115	orf19.115	0.000468165	0.988642	0.00824626	0.828361	0.00182639	0.938462	0.0243619	0.308277	Predicted ORF in Assemblies 19, 20 and 21; possibly spurious ORF (Annotation Working Group prediction)
orf19.1150	orf19.1150	0.0067364	0.118424	0.00713875	0.463482	0.00394506	0.360473	0.000299592	0.970962	Predicted ORF in Assemblies 19, 20 and 21; regulated by Gcn2p and Gcn4p
orf19.1152	orf19.1152	0.00765374	0.0202598	-0.0112187	0.368877	-0.000213553	0.969197	0.00878411	0.0842617	Predicted ORF in Assemblies 19, 20 and 21; regulated by Gcn2p and Gcn4p; induced in core stress response
orf19.1153	GAD1	0.00259241	0.317477	0.00238418	0.667959	0.00171145	0.735594	-0.00161664	0.730334	Protein described as glutamate decarboxylase; macrophage-downregulated gene; alkaline downregulated; amphotericin B induced; transcriptionally activated by Mnl1p under weak acid stress
orf19.1155	DPP2	0.00310514	0.529685	0.0107247	0.54274	0.0112161	0.241009	-0.0124346	0.286946	Predicted ORF in Assemblies 19, 20 and 21; similar to S. cerevisiae pyrophosphate phosphatase Lpp1p; possible role in farnesol biosynthesis
orf19.1156	FUS1	-0.00123381	0.865582	0.0110862	0.282356	-0.00411744	0.38183	0.0106452	0.0907038	Probable ortholog of S. cerevisiae Fus1p, which is a membrane protein required for mating; transcription is activated by Cph1p in mating type a cells, homozygous for the MTLa locus; alpha factor induced
orf19.1158	orf19.1158	0.000719108	0.79747	-0.00156535	0.482344	-0.00340939	0.235811	0.00146772	0.830826	Predicted ORF in Assemblies 19, 20 and 21
orf19.1159	orf19.1159	-0.00219757	0.845125	0.0115974	0.312716	0.0137816	0.145336	0.0168534	0.0911856	Predicted ORF in Assemblies 19, 20 and 21; similar to A. nidulans CYSA serine O-trans-acetylase, suggesting that C. albicans uses an O-acetyl-serine (OAS) pathway of sulfur assimilation; induced upon biofilm formation
orf19.1161	PLD1	-0.00520219	0.290214	0.00636685	0.355327	-0.00302401	0.511256	-0.00200422	0.59408	Phospholipase D1; required for phosphatidic acid and for most diacylglycerol production; required for wild-type mouse virulence, but not rat oral virulence; mutant defect in hyphal growth on solid substrates; similar to S. cerevisiae Spo14p
orf19.1162	orf19.1162	0.00699272	0.271833	-0.00460733	0.463482	-0.00226661	0.745661	-0.00894943	0.573092	Predicted ORF in Assemblies 19, 20 and 21; increased transcription is observed upon benomyl treatment
orf19.1162.1	orf19.1162.1	0.00147307	0.92202	0.0066056	0.74286	-0.00101399	0.916647	0.0123192	0.178134	ORF Predicted by Annotation Working Group
orf19.1164	GAR1	0.00703266	0.227997	0.00612695	0.341943	-0.000163811	0.988062	0.00442062	0.405234	Predicted ORF in Assemblies 19, 20 and 21; mutation confers hypersensitivity to tubercidin (7-deazaadenosine); macrophage/pseudohyphal-induced
orf19.1166	CTA3	0.0088144	0.0669242	0.00991912	0.21036	0.00186375	0.819165	-0.00417463	0.648785	Protein similar to S. cerevisiae Ede1p, which is involved in endocytosis; activates transcription in 1-hybrid assay in S. cerevisiae
orf19.117	orf19.117	0.00757758	0.176413	0.00186337	0.81418	0.004137	0.411297	0.00913664	0.294051	Predicted ORF in Assemblies 19, 20 and 21
orf19.1177	orf19.1177	0.00378596	0.591661	0.00288025	0.762295	-0.00582111	0.456862	-0.0236447	0.0482933	Predicted ORF in Assemblies 19, 20 and 21
orf19.1179	orf19.1179	0.00385681	0.403364	-0.0179231	0.0292054	0.000427984	0.861846	-0.00268185	0.832098	Transcriptionally regulated by iron; expression greater in high iron; possibly subject to Kex2p processing
orf19.1180	orf19.1180	-0.112285	0.0117907	-0.259688	0.0289335	-0.171609	0.0108633	-0.193349	0.016685	Predicted ORF in Assemblies 19, 20 and 21
orf19.1181	orf19.1181	0.0105252	0.108749	0.0105296	0.167525	-0.000957787	0.857462	0.00458263	0.533078	Predicted ORF in Assemblies 19, 20 and 21
orf19.1182	orf19.1182	0.00375725	0.676067	-0.011558	0.754624	-0.000433563	0.961831	0.000961515	0.909371	Predicted ORF in Assemblies 19, 20 and 21
orf19.1183	orf19.1183	-0.0929633	0.348631	-0.0647186	0.406914	-0.150279	0.454842	-0.0568043	0.504305	Predicted ORF in Assemblies 19, 20 and 21
orf19.1185	orf19.1185	0.00322958	0.48314	0.00340095	0.645328	0.00866739	0.0732236	0.00718751	0.194082	Predicted ORF in Assemblies 19, 20 and 21
orf19.1186	orf19.1186	-0.00837878	0.11499	-0.00232683	0.856384	0.00754693	0.205662	0.00193457	0.748183	Predicted ORF in Assemblies 19, 20 and 21; possibly spurious ORF (Annotation Working Group prediction)
orf19.1187	CPH2	0.0143555	0.144148	0.00822471	0.757792	0.0140293	0.228774	-0.00504234	0.705084	Transcriptional activator of hyphal growth; Myc bHLH family: directly regulates Tec1p, which regulates hypha-specific genes; probably homodimeric, phosphorylated; enhances S. cerevisiae nitrogen starvation-induced pseudohyphal growth
orf19.1191	orf19.1191	0.00476518	0.39502	0.00552461	0.344721	0.00527386	0.158744	0.0057122	0.276102	Predicted ORF in Assemblies 19, 20 and 21
orf19.1195	orf19.1195	-0.00864239	0.280743	-0.00155871	0.903884	-0.00259168	0.728867	-0.000567796	0.949883	Predicted ORF in Assemblies 19, 20 and 21
orf19.1199	NOP5	0.0149173	0.0355393	0.00863203	0.0566958	0.00904429	0.00165786	0.00704811	0.104769	Protein similar to S. cerevisiae Nop5p protein of small nucleolar ribonucleoprotein complex; transposon mutation affects filamentous growth; macrophage/pseudohyphal-induced; physically interacts with TAP-tagged Nop1p
orf19.1201	orf19.1201	0.000207782	0.967111	0.00225499	0.720057	-0.00118702	0.874706	0.00312477	0.591326	Predicted ORF in Assemblies 19, 20 and 21
orf19.1202	orf19.1202	0.00313583	0.204539	0.00230712	0.767424	-0.00330679	0.368882	0.00201031	0.67798	Predicted ORF in Assemblies 19, 20 and 21
orf19.1203	SRO77	0.00506426	0.550542	0.00273971	0.849953	0.0156345	0.0732236	0.00606867	0.51359	Predicted ORF in Assemblies 19, 20 and 21; filament induced; fungal-specific (no human or murine homolog)
orf19.1207	orf19.1207	0.00197327	0.69572	0.00367896	0.276566	0.00205337	0.409292	-0.0108002	0.408708	Predicted ORF in Assemblies 19, 20 and 21
orf19.1208.1	orf19.1208.1	0.00556101	0.793473	0.0165402	0.255612	-0.0253916	0.0184221	0.015183	0.112191
orf19.1210	orf19.1210	0.00013948	0.993382	0.0135862	0.348746	-0.00214955	0.815031	-0.0109183	0.33135	Predicted ORF in Assemblies 19, 20 and 21
orf19.1212	orf19.1212	0.0140311	0.1569	0.00642306	0.741161	0.00625195	0.741859	0.00524523	0.623129	Predicted ORF in Assemblies 19, 20 and 21
orf19.1219	orf19.1219	-4.5277e-05	0.996081	0.00751526	0.311778	0.00215087	0.577589	0.00378343	0.626229	Predicted ORF in Assemblies 19, 20 and 21
orf19.122	CDC20	0.00168589	0.750467	0.00696298	0.391386	0.0035967	0.389965	0.00474835	0.33538	Protein similar to S. cerevisiae Cdc20p, which is a cell-cycle regulated activator of the anaphase promoting complex; induced under Cdc5p depletion; member of conserved Mcm1p regulon; periodic mRNA expression, peak at cell-cycle G2/M phase
orf19.1221	ALG2	0.00341994	0.384311	0.000430086	0.962255	0.00579285	0.588523	0.000290459	0.95477	Putative mannosyltransferase involved in cell wall mannan biosynthesis; transcription is elevated in chk1, nik1, and sln1 homozygous null mutants
orf19.1223	DBF2	0.00523089	0.132434	1.12433e-05	0.997781	0.00254393	0.262543	-0.00216604	0.535316	Essential serine/threonine protein kinase involved in mitotic spindle formation and cytokinesis; required for septum formation, exit from mitosis, and normal hyphal morphogenesis; virulence-group-correlated expression
orf19.1227	ZCF4	0.00126878	0.86905	0.000956066	0.939494	0.00636122	0.486552	0.0136654	0.0964201	Putative transcription factor with zinc cluster DNA-binding motif; possibly spurious ORF (Annotation Working Group prediction)
orf19.1228	HAP2	0.0072965	0.132434	-0.00179938	0.860608	-0.0108923	0.44718	0.00494724	0.0792242	CCAAT-binding factor regulates low-iron (chelation) induction of FRP1 transcription, and under these conditions CBF comprises Hap43p and probably Hap2p and Hap3p
orf19.1229	orf19.1229	-0.00525509	0.61089	0.0073501	0.621613	-0.00809175	0.178217	-0.00564939	0.537686	Predicted ORF in Assemblies 19, 20 and 21
orf19.123	RCN1	0.000235081	0.973414	0.00682771	0.0544029	-0.00458285	0.518788	-0.00530738	0.649345	Protein involved in calcineurin-dependent signaling that controls stress response and virulence; inhibits calcineurin function
orf19.1234	FGR6-10	0.00968741	0.317594	0.00224338	0.837297	0.00955291	0.431037	-0.0021863	0.770406	Protein lacking an ortholog in S. cerevisiae; member of a family encoded by FGR6-related genes in the RB2 repeat sequence; transposon mutation affects filamentous growth
orf19.1235	HOM3	0.0180757	0.119353	0.000890029	0.964502	0.0233366	0.0732236	0.00835349	0.505071	Putative L-aspartate 4-P-transferase; fungal-specific (no human or murine homolog); regulated by Gcn2p and Gcn4p
orf19.1236	orf19.1236	0.00114702	0.79747	0.0067281	0.480715	0.0058518	0.309997	-0.00357926	0.743924	Predicted ORF in Assemblies 19, 20 and 21
orf19.1238	TUB4	-0.0202514	0.0163427	-0.071893	0.0544364	-0.0267319	0.115237	-0.0233968	0.0692604	Putative gamma-tubulin; induced upon adherence to polystyrene; transcription is regulated by Nrg1p and Mig1p; periodic mRNA expression, peak at cell-cycle S/G2 phase
orf19.1239	orf19.1239	-0.012641	0.133187	-0.0267619	0.303016	0.000173615	0.985192	-0.00325205	0.705084	Predicted ORF in Assemblies 19, 20 and 21; exogenously expressed protein is a substrate for Kex2p processing in vitro; fluconazole-downregulated; possibly spurious ORF (Annotation Working Group prediction)
orf19.124	CIC1	0.00151489	0.575549	0.00178316	0.528294	0.00236448	0.238278	0.0009595	0.737085	Predicted ORF in Assemblies 19, 20 and 21; transcription is upregulated in both intermediate and mature biofilms
orf19.1240	orf19.1240	-0.00142133	0.740458	0.000800437	0.799679	0.001059	0.802401	0.00189583	0.658733	Predicted ORF in Assemblies 19, 20 and 21; fungal-specific (no human or murine homolog)
orf19.1244	GYP2	-0.00269624	0.512578	0.000237524	0.959782	0.00453983	0.259043	0.000486895	0.876035	Predicted ORF in Assemblies 19, 20 and 21
orf19.1246	orf19.1246	0.0112187	0.307888	0.00423814	0.436532	-0.00133121	0.884779	-0.00367995	0.688726	Predicted ORF in Assemblies 19, 20 and 21; greater mRNA abundance observed in a cyr1 homozygous null mutant than in wild type
orf19.1247	orf19.1247	0.00130234	0.680856	0.00246133	0.697496	-0.00147754	0.748841	0.0049581	0.645312	Predicted ORF in Assemblies 19, 20 and 21
orf19.1248	orf19.1248	0.00569818	0.191032	0.000707975	0.953277	0.00457012	0.311132	0.00608953	0.105666	Putative protein of unknown function; heterozygous null mutant exhibits resistance to parnafungin in the C. albicans fitness test; predicted ORF in Assemblies 19, 20 and 21
orf19.1250	orf19.1250	0.00224372	0.611446	0.0057067	0.500717	0.000323599	0.949646	0.000487751	0.93019	Predicted ORF in Assemblies 19, 20 and 21
orf19.1251	BRN1	0.00667135	0.653166	-0.00235913	0.907761	-0.000862406	0.947578	0.007742	0.764688	Predicted ORF in Assemblies 19, 20 and 21; cell-cycle regulated periodic mRNA expression
orf19.1252	YME1	0.00350081	0.11947	0.0011037	0.901556	0.00552816	0.129844	0.00158441	0.721106	Protein not essential for viability; similar to S. cerevisiae Yme1p, which is a mitochondrial inner membrane protease of the AAA family
orf19.1254	SEC23	0.00492065	0.557514	0.0110217	0.740756	0.00394896	0.646525	0.00764543	0.542974	Transcription is regulated upon yeast-hyphal switch
orf19.1257	orf19.1257	-0.0072511	0.42616	0.012005	0.522274	-0.00379465	0.663441	-0.00997577	0.6652	Predicted ORF in Assemblies 19, 20 and 21
orf19.1258	orf19.1258	0.0121345	0.421539	7.31221e-05	0.994198	0.00943367	0.0547395	0.0126482	0.236502	Predicted ORF in Assemblies 19, 20 and 21; regulated by Tsa1p, Tsa1Bp in minimal media at 37 deg; transcription is induced in response to alpha pheromone in SpiderM medium; clade-associated gene expression
orf19.1259	orf19.1259	0.00772541	0.0495135	0.00298266	0.673709	0.00648292	0.0956222	0.00567321	0.348553	Predicted ORF in Assemblies 19, 20 and 21
orf19.1261	CGT1	0.00765623	0.189754	0.000750042	0.952903	0.0100822	0.0527932	0.00625966	0.366323	mRNA 5' guanylyltransferase; small subunit of mRNA capping enzyme; binds an RNA Pol II C-terminal domain peptide; Cet1p and Cgt1p form a 2:1 complex; functional homolog of S. cerevisiae Ceg1p
orf19.1264	CFL2	-0.045631	0.513417	-0.0578776	0.466703	-0.0480259	0.490217	-0.0396165	0.576211	Iron utilization protein; similar to an S. cerevisiae oxidoreductase, Ynr060Wp; regulated by Sfu1p, Nrg1p, Tup1p, Rim101p; alkaline, low iron, fluphenazine, ciclopirox olamine, flucytosine, induced; caspofungin, amphotericin B repressed
orf19.1265	orf19.1265	-0.0115136	0.1961	0.00516612	0.613444	0.00129095	0.870619	0.00727019	0.406164	Predicted ORF in Assemblies 19, 20 and 21
orf19.1267	orf19.1267	0.000901145	0.807082	0.00334475	0.331811	-0.000567738	0.86631	0.00333872	0.537632	Predicted ORF in Assemblies 19, 20 and 21
orf19.1270	orf19.1270	-4.81737e-05	0.993382	0.00299718	0.161622	-0.000389846	0.910874	-0.00130541	0.809627	Predicted ORF in Assemblies 19, 20 and 21; similar to ferric reductase Fre10p
orf19.1273	orf19.1273	-0.00518295	0.108252	-0.000573573	0.952903	-8.74714e-05	0.984374	-0.000848518	0.779183	Predicted ORF in Assemblies 19, 20 and 21
orf19.1274	orf19.1274	-0.00102971	0.678031	0.00797895	0.265203	-0.00114094	0.871593	0.00176412	0.740063	Predicted ORF in Assemblies 19, 20 and 21
orf19.1275	GAT1	0.0104863	0.0833148	0.00321642	0.589528	0.00756874	0.144209	0.00882154	0.274013	Zinc finger transcriptional regulator of nitrogen utilization; required for nitrogen catabolite repression and utilization of isoleucine, tyrosine and tryptophan N sources; required for virulence in a mouse systemic infection model
orf19.1276	orf19.1276	-0.00394685	0.367984	0.00208565	0.818829	0.00173169	0.627143	-0.00144153	0.817869	Predicted ORF in Assemblies 19, 20 and 21; not essential for viability; similar to S. cerevisiae Vhs3p, which is a putative phosphopantothenoylcysteine decarboxylase
orf19.1279	CDS1	0.00197644	0.841291	-0.00837706	0.572587	0.00292114	0.538802	-0.0137118	0.272917	Protein similar to S. cerevisiae Cds1p; transposon mutation affects filamentous growth
orf19.1280	SUI1	0.00195945	0.500646	0.00121502	0.830515	0.00475521	0.178508	0.00428542	0.442752	Putative translation initiation factor; flucytosine induced; genes encoding ribosomal subunits, translation factors, and tRNA synthetases are downregulated upon phagocytosis by murine macrophage
orf19.1281	orf19.1281	-0.00390949	0.710252	0.00733726	0.654736	-0.00087188	0.923692	0.0034492	0.780142	Predicted ORF in Assemblies 19, 20 and 21
orf19.1283	MEC1	-0.000998928	0.92202	-0.00548667	0.682193	-0.0021585	0.627546	0.00045361	0.936119	Protein described as cell cycle checkpoint protein; RNA abundance regulated by tyrosol and cell density
orf19.1286	orf19.1286	-0.108164	0.140617	-0.0371072	0.102382	-0.00142937	0.964534	-0.0401715	0.654732	Predicted ORF in Assemblies 19, 20 and 21
orf19.1289	SCT1	0.00599871	0.203089	0.000389032	0.975404	0.000148807	0.979928	4.3245e-06	0.99933	Putative glycerol-3-phosphate O-acyltransferase; fungal-specific (no human or murine homolog)
orf19.1290	XKS1	-0.000241033	0.968297	0.000907595	0.828296	-0.000224376	0.895543	0.00199952	0.413252	Predicted ORF in Assemblies 19, 20 and 21; increased expression in response to prostaglandins
orf19.1296	orf19.1296	-0.00551894	0.710252	0.0109866	0.4658	0.00444234	0.370667	-0.00335198	0.719716	Predicted ORF in Assemblies 19, 20 and 21
orf19.1297	orf19.1297	-0.00266401	0.739283	-0.0163997	0.391386	0.0050959	0.452962	0.00243431	0.727776	Predicted ORF in Assemblies 19, 20 and 21
orf19.1298	orf19.1298	0.0110287	0.347224	0.000369154	0.982759	0.00518595	0.661796	0.0077892	0.455383	Predicted ORF in Assemblies 19, 20 and 21
orf19.130	orf19.130	0.000233464	0.989954	-0.00862565	0.174941	-0.0245129	0.0288735	-0.00398135	0.606861	Predicted ORF in Assemblies 19, 20 and 21
orf19.1301	orf19.1301	-0.00247129	0.590979	0.00278547	0.121161	0.000875531	0.758249	0.0019597	0.415267	Predicted ORF in Assemblies 19, 20 and 21
orf19.1304	orf19.1304	0.00336926	0.21884	0.00290538	0.67709	0.0032311	0.242355	0.00615627	0.0917597	Predicted ORF in Assemblies 19, 20 and 21
orf19.1311	SPO75	0.0066627	0.162436	0.00523082	0.517281	0.00345775	0.334909	0.00774643	0.232982	Similar to S. cerevisiae sporulation protein; fungal-specific (no human or murine homolog)
orf19.1314	orf19.1314	-0.010171	0.489007	0.00116648	0.873665	-0.00251211	0.651911	-0.00459782	0.606289	Predicted ORF in Assemblies 19, 20 and 21
orf19.1317	OSH3	-0.172663	0.169219	-0.288761	0.0100583	-0.151576	0.0158978	-0.238403	0.0247993	Protein required for wild-type filamentation; has oxysterol binding protein domain and pleckstrin homology motif; overproducton suppresses cph1 homozygous null filamnetation defect; similar to S. cerevisiae Osh3p
orf19.132	orf19.132	-0.00252093	0.719521	0.0112848	0.185448	0.00908937	0.0684425	0.00226937	0.730265	Putative ortholog of S. cerevisiae SIF2; has a LisH motif; predicted ORF in Assemblies 19, 20 and 21
orf19.1324	RAD2	0.000299178	0.929959	0.00141273	0.667959	0.00644236	0.246848	0.00349274	0.281212	Ortholog of S. cerevisiae RAD2, nucleotide excision repair nuclease; null mutant is extremely sensitive to UV irradiation; transcription is upregulated upon interaction with macrophages
orf19.1325	ECM38	0.00622525	0.106471	-0.00978726	0.200494	-0.00278793	0.554345	0.0124297	0.0300472	Alkaline upregulated
orf19.1326	orf19.1326	-0.000520127	0.916895	0.00136399	0.700738	9.503e-05	0.969623	0.000575654	0.88303	Predicted ORF in Assemblies 19, 20 and 21
orf19.1327	RBT1	0.0141326	0.284832	0.014795	0.286299	0.0111648	0.3071	0.0121523	0.427758	Cell wall protein with similarity to Hwp1p, required for virulence; predicted to be cell-wall attached and glycosylated; Tup1p repressed; serum, hyphal and alkaline induced; farnesol, alpha factor induced; Rfg1p-, Rim101p-regulated
orf19.133	orf19.133	0.00326968	0.331969	0.000108458	0.981222	0.000503288	0.929386	0.00553086	0.456533	Predicted ORF in Assemblies 19, 20 and 21; induced by nitric oxide in yhb1 mutant
orf19.1330	orf19.1330	-0.00276024	0.66325	0.00462156	0.627976	0.0018943	0.71992	0.00353195	0.655515	Predicted ORF in Assemblies 19, 20 and 21
orf19.1331	HSM3	-0.0287975	0.423215	-0.0457421	0.0541861	-0.0213765	0.13555	-0.0906208	0.0174439	Protein not essential for viability; similar to S. cerevisiae Hsm3p, which may be involved in DNA mismatch repair
orf19.1332	SNG4	-0.00849189	0.140835	-0.020011	0.537368	-0.00488561	0.565952	-0.00482976	0.620027	Predicted ORF in Assemblies 19, 20 and 21; transcriptionally activated by Mnl1p under weak acid stress; shows Mob2p-dependent hyphal regulation
orf19.1333	SNG3	0.000337957	0.927309	0.00701404	0.150319	0.000647939	0.819384	-0.00284458	0.671558	Predicted ORF in Assemblies 19, 20 and 21; mutation confers hypersensitivity to toxic ergosterol analog; shows colony morphology-related gene regulation by Ssn6p
orf19.1334	orf19.1334	3.77714e-05	0.988787	0.000512378	0.904071	0.00457883	0.366112	0.00214619	0.487474	Predicted ORF in Assemblies 19, 20 and 21; possibly spurious ORF (Annotation Working Group prediction); transcription is repressed in response to alpha pheromone in SpiderM medium
orf19.1335	orf19.1335	0.00669627	0.163945	0.00500013	0.495449	0.00555209	0.197696	0.00703934	0.207773	Predicted ORF in Assemblies 19, 20 and 21
orf19.1339	CPY1	0.0214152	0.0217741	0.0138772	0.25641	0.0131571	0.152953	0.022495	0.0212449	Carboxypeptidase Y; transcriptionally regulated at yeast-hyphal transition or macrophage response; upregulated in the presence of human neutrophils; regulated by Gcn2p and Gcn4p; putative N-glycosylation
orf19.134	orf19.134	-0.0096396	0.627389	0.00439183	0.761425	0.00112981	0.916566	0.00190811	0.859671	Predicted ORF in Assemblies 19, 20 and 21; ciclopirox olamine induced
orf19.1340	orf19.1340	0.00363814	0.353686	0.00260032	0.783114	0.00520339	0.115237	0.00243439	0.628742	Predicted ORF in Assemblies 19, 20 and 21; protein level decreased in stationary phase cultures
orf19.1342	SHM1	0.00219118	0.599287	0.000481145	0.923083	0.00075898	0.860158	-0.00381527	0.247039	Mitochondrial serine hydroxymethyltransferase; complements the glycine auxotrophy of an S. cerevisiae shm1 null shm2 null gly1-1 triple mutant; protein detected by mass spec in exponential and stationary phase cultures
orf19.1343	orf19.1343	-3.98826e-05	0.997833	-0.00293482	0.931319	0.0102484	0.115237	0.00575739	0.427958	Predicted ORF in Assemblies 19, 20 and 21; induced by nitric oxide
orf19.1345	LIP8	0.00673358	0.143272	0.000680352	0.927226	0.00546942	0.300289	0.00426994	0.540912	Secreted lipase, member of a differentially expressed lipase gene family with possible roles in nutrition and/or in creating an acidic microenvironment; LIP5 and LIP8 are expressed at all stages of both mucosal and systemic infection
orf19.135	orf19.135	0.000502445	0.952074	0.00295075	0.703378	-0.00155605	0.815762	0.00573136	0.249775	Predicted ORF in Assemblies 19, 20 and 21
orf19.1350	orf19.1350	0.000435324	0.8982	0.00149614	0.793205	-0.0127594	0.423319	0.00354155	0.381942	Predicted ORF in Assemblies 19, 20 and 21
orf19.1354	UCF1	-0.00464616	0.702288	0.00163387	0.926824	0.00474085	0.346915	-0.00644864	0.506949	Transcriptionally regulated by iron or by yeast-hyphal switch; expression greater in high iron, decreased upon yeast-hyphal switch; downregulation correlates with clinical development of fluconazole resistance; Ras1p-regulated
orf19.1355	orf19.1355	-0.000400154	0.93702	-0.00692351	0.247444	0.00391353	0.269566	0.00018869	0.980824	Predicted ORF in Assemblies 19, 20 and 21; protein detected by mass spec in stationary phase cultures
orf19.1357	FCY21	-0.0156983	0.489158	-0.0247092	0.353839	-0.0180545	0.57037	-0.0426564	0.202141	High affinity, high capacity, hypoxanthine-adenine-guanine-cytosine/ H+ symporter; purine-cytosine permease of pyrimidine salvage; similar to S. cerevisiae Fcy2p; mutation confers resistance to 5-fluorocytosine (5-FC)
orf19.136	orf19.136	-0.000798106	0.946967	-0.00988463	0.198707	0.00491278	0.449732	-0.00064446	0.948493	Predicted membrane transporter, member of the drug:proton antiporter (12 spanner) (DHA1) family, major facilitator superfamily (MFS)
orf19.1365	orf19.1365	-0.00414642	0.0948596	-0.00367146	0.196067	0.00908806	0.26579	-0.00753738	0.0684159	Predicted ORF in Assemblies 19, 20 and 21; mutation confers hypersensitivity to toxic ergosterol analog; constitutive expression independent of MTL or white-opaque status
orf19.1369	orf19.1369	0.0038873	0.599543	0.00282689	0.673709	-0.0126568	0.361003	-0.00216586	0.920871	Predicted ORF in Assemblies 19, 20 and 21
orf19.1370	orf19.1370	-0.100963	0.0249887	-0.140458	0.0822268	-0.109277	0.0971721	-0.101945	0.00553338	Predicted ORF in Assemblies 19, 20 and 21; expression is regulated upon white-opaque switching; transcription is repressed in response to alpha pheromone in SpiderM medium
orf19.1371	orf19.1371	0.00538228	0.483539	0.01174	0.159851	0.00342369	0.711817	-0.0057721	0.805106	Predicted ORF in Assemblies 19, 20 and 21
orf19.1372	orf19.1372	-0.0157114	0.460075	-0.0171777	0.6367	0.00227601	0.889779	-0.0175581	0.0885995	Gene transcription regulated by Mig1p and Tup1p
orf19.1375	LEU42	0.00735827	0.215932	0.010786	0.466703	0.00264066	0.814153	0.00195605	0.811515	Putative alpha-isopropylmalate synthase; fungal-specific (no human/murine homolog); upregulated in the presence of human blood or polymorphonuclear cells; regulated by Gcn2p and Gcn4p; detected by mass spec in stationary phase cultures
orf19.1376	orf19.1376	0.00528485	0.560025	-0.00325218	0.801471	-0.00219585	0.607824	0.00345509	0.658733	Predicted ORF in Assemblies 19, 20 and 21
orf19.1377	IPK2	0.0156559	0.0191332	0.0247103	0.120082	0.00806514	0.260752	0.00636473	0.553101	Predicted ORF in Assemblies 19, 20 and 21; moderately induced at 42 deg
orf19.1378	SUP35	0.000456619	0.933898	0.00338347	0.583537	0.0036806	0.303479	0.00501746	0.394651	Translation factor eRF3; shows prion-like aggregation in some, not all, studies; partially complements S. cerevisiae sup35 mutant translation defect; species barrier with S. cerevisiae Sup35p prion; gene not regulated by yeast-hyphal switch
orf19.138	FIG1	0.0148619	0.0740616	0.0103005	0.409142	0.00754022	0.333179	0.00441162	0.544263	Probable ortholog of S. cerevisiae Fig1p, which is an integral membrane protein required for mating; role in thigmotropism; transcription is opaque-specific, a-specific, and activated by Cph1p or alpha pheromone
orf19.1382	YEA4	-0.0727815	0.244042	-0.0742934	0.356779	-0.0835186	0.190207	-0.0777344	0.403556	Protein similar to S. cerevisiae Yea4p; transcription is induced in response to alpha pheromone in SpiderM medium
orf19.1388	orf19.1388	0.000490964	0.959075	-0.017362	0.211618	0.00798197	0.282185	-0.0114199	0.397299	Predicted ORF in Assemblies 19, 20 and 21; induced upon biofilm formation
orf19.139	TRA1	0.00042405	0.956228	0.000285297	0.975529	0.000131231	0.98179	0.00735676	0.524159	Subunit of the NuA4 histone acetyltransferase complex
orf19.1390	PMI1	0.00499257	0.140632	0.00381196	0.697966	0.00477077	0.43138	-0.00603133	0.64155	Phosphomannose isomerase; cell wall biosynthesis enzyme; drug target; functional homolog of S. cerevisiae and E. coli phosphomannose isomerase; Gcn4p-regulated; repressed by 3-AT; induced on adherence to polystyrene, phagocytosis
orf19.1391	orf19.1391	0.00804792	0.0942858	0.00664379	0.16204	0.00745073	0.177618	0.00374607	0.582598	Predicted ORF in Assemblies 19, 20 and 21
orf19.1393	orf19.1393	0.00351264	0.622011	-0.00397736	0.592704	0.00334006	0.654865	0.00617779	0.20292	Predicted ORF in Assemblies 19, 20 and 21
orf19.1394	orf19.1394	-0.011506	0.526957	0.00339458	0.886154	0.0045812	0.63275	-0.0194848	0.537632	Protein not essential for viability; protein level decreased in stationary phase cultures
orf19.1395	orf19.1395	0.0189705	0.0278871	0.0107268	0.378346	0.013848	0.0998778	0.0148048	0.145734	Predicted ORF in Assemblies 19, 20 and 21
orf19.1397	orf19.1397	0.0086636	0.00997282	0.00641314	0.187075	0.00662417	0.241195	0.000597107	0.917112	Predicted ORF in Assemblies 19, 20 and 21
orf19.1401	EAP1	-0.00673511	0.529307	0.00262331	0.830659	-0.0167027	0.0986619	0.00643108	0.547889	Cell wall adhesin required for cell-cell adhesion and biofilm formation; GPI anchored; Efg1p-regulated; suppresses polystyrene or cell adhesion, filamentation, invasive growth defects of S. cerevisiae flo8 or flo11 mutant
orf19.1402	CCT2	-0.00430843	0.588721	0.00679741	0.463482	-0.000303159	0.954906	0.00862427	0.109375	Predicted ORF in Assemblies 19, 20 and 21; protein detected by mass spec in exponential and stationary phase cultures
orf19.1403	orf19.1403	-0.0228669	0.0437834	-0.00528781	0.869198	-0.00321787	0.734486	-0.0157309	0.202868	Predicted ORF in Assemblies 19, 20 and 21
orf19.1405	PHO13	-0.00491105	0.703828	-0.0175733	0.6367	-0.0112872	0.100828	-0.00608697	0.644375	Transcription is regulated upon yeast-hyphal switch
orf19.1409	VAC7	0.0022967	0.514373	0.00231097	0.703378	0.00303419	0.262276	0.00377022	0.50862	Protein not essential for viability; similar to S. cerevisiae Fab1p, which is an enzyme regulator involved in phospholipid metabolism
orf19.1409.1	orf19.1409.1	0.00857945	0.292411	-0.0268638	0.500928	0.00768496	0.723383	-0.00888586	0.320588	Predicted ORF in Assembly 20 and 21; gene has intron
orf19.1412	orf19.1412	0.0168824	0.0610336	0.0160657	0.173086	0.00556387	0.619774	0.0105809	0.515598	Predicted ORF in Assemblies 19, 20 and 21; possibly spurious ORF (Annotation Working Group prediction)
orf19.1413	YFH1	0.00345383	0.791184	0.00442347	0.805263	-0.00356075	0.79606	0.0025736	0.87557	Frataxin; homolog of S. cerevisiae Yfh1p, mammalian frataxin; may be required for iron storage or delivery; role in oxidative stress resistance; transcription regulated by Nrg1p, repressed if iron absent, induced by macrophage interaction
orf19.1414	orf19.1414	-8.76503e-05	0.98162	6.09357e-05	0.993216	0.000404589	0.917035	0.00126797	0.428228	Putative protein of unknown function, transcription is upregulated in an RHE model of oral candidiasis; predicted ORF in Assemblies 19, 20 and 21; possibly spurious ORF (Annotation Working Group prediction)
orf19.1422	FZO1	-0.00152059	0.472112	0.00116526	0.765832	-0.00338225	0.480386	-0.00211281	0.675012	Putative mitochondrial biogenesis protein; fungal-specific (no human or murine homolog)
orf19.1426	orf19.1426	-0.00999769	0.468336	0.008392	0.140975	-0.00171181	0.723383	0.00775206	0.318188	Predicted ORF in Assemblies 19, 20 and 21
orf19.1427	orf19.1427	0.00279077	0.522177	0.00900807	0.199695	0.00500487	0.288401	-0.00515374	0.495998	Putative transporter; fungal-specific (no human or murine homolog)
orf19.1428	orf19.1428	-0.056338	0.0612077	-0.152258	0.301548	-0.0456055	0.0445026	-0.103256	0.0129758	Predicted ORF in Assemblies 19, 20 and 21
orf19.1429	SOH1	-0.000632356	0.954128	-0.0174714	0.383077	-0.0103723	0.144207	-0.00593514	0.520514	Predicted ORF in Assemblies 19, 20 and 21; cell-cycle regulated periodic mRNA expression
orf19.1430	orf19.1430	0.00333513	0.541711	0.00115871	0.911776	0.00513203	0.236651	0.0053974	0.164112	Predicted ORF in Assemblies 19, 20 and 21
orf19.1434	orf19.1434	-0.00987144	0.0197441	-0.000390381	0.952607	0.00165973	0.517484	-0.00084907	0.836897	Predicted ORF in Assemblies 19, 20 and 21
orf19.1438	orf19.1438	0.00137826	0.653166	-0.0010408	0.926778	0.00111446	0.790065	-0.00438228	0.495998	Predicted ORF in Assemblies 19, 20 and 21
orf19.1439	IPK1	-0.00702492	0.0868509	-0.00769883	0.493115	-0.00449436	0.69717	-0.0142576	0.417232	Predicted ORF in Assemblies 19, 20 and 21
orf19.144	SNU114	0.00171832	0.3752	0.00357818	0.0222551	0.00677004	0.196986	-0.0016263	0.630909	Protein likely to be essential for growth, based on an insertional mutagenesis strategy; similar to S. cerevisiae Snu114p, which is an RNA helicase involved in pre-mRNA splicing
orf19.1440	orf19.1440	0.000954271	0.834936	-0.0129398	0.0185245	0.000709682	0.874706	-0.00430778	0.479822	Predicted ORF in Assemblies 19, 20 and 21; possibly spurious ORF (Annotation Working Group prediction)
orf19.1442	PLB4.5	0.00277539	0.39045	0.000538331	0.88711	-1.75545e-05	0.996236	0.00138885	0.697998	Putative phospholipase B; Hog1p-induced; regulated by Ssn6p; putative GPI-anchor; repressed during cell wall regeneration; clade-associated gene expression
orf19.1445	ESC4	0.00474791	0.0186175	0.00495962	0.185505	-0.00090231	0.891706	0.00514538	0.17079	Protein similar to S. cerevisiae Esc4p, which represses transposition; transposon mutation affects filamentous growth
orf19.1447	orf19.1447	0.00861959	0.347224	0.00125466	0.940525	-0.00151807	0.887901	0.00293151	0.786983	Predicted ORF in Assemblies 19, 20 and 21
orf19.1448	APT1	-0.000149768	0.986942	0.00264241	0.832382	-0.00438086	0.339425	0.00457726	0.705084	Predicted ORF in Assemblies 19, 20 and 21; flucytosine induced; repressed by nitric oxide; protein level decreased in stationary phase cultures
orf19.1448.1	orf19.1448.1	0.0143637	0.0579704	0.0142075	0.105979	0.00613437	0.412652	0.0114177	0.160431	Predicted ORF in Assembly 20 and 21; gene has intron
orf19.1449	orf19.1449	0.00374061	0.478535	-0.00857565	0.33522	-0.0118281	0.49543	0.00201713	0.616986	Increased transcription is observed in an azole-resistant strain that overexpresses MDR1; protein detected by mass spec in exponential and stationary phase cultures
orf19.145	RPB4	0.000258334	0.975104	-0.000521342	0.947538	0.0045508	0.561212	0.00651514	0.155023	Protein similar to S. cerevisiae Rpb4p, which is a component of RNA polymerase II; transposon mutation affects filamentous growth
orf19.1450	orf19.1450	0.0285196	0.00570842	-0.00267741	0.922772	-0.000638269	0.96277	-0.00389011	0.838394	Predicted ORF in Assemblies 19, 20 and 21; possibly spurious ORF (Annotation Working Group prediction)
orf19.1451	SRB9	-0.00366504	0.844231	-0.0213969	0.625547	-0.0074634	0.606699	-0.039252	0.154236	Protein with similarity to S. cerevisiae Srb9p transcription mediator; transposon mutation affects filamentous growth; suppresses S. cerevisiae diploid filamentous (flo8, ste7, ste12, tec1) or haploid invasive (flo8) mutant growth defects
orf19.1453	SPT5	0.0088291	0.170095	0.00658998	0.317981	-0.00126619	0.885531	-0.0010908	0.89441	Protein similar to S. cerevisiae Spt5p transcription elongation factor; transposon mutation affects filamentous growth
orf19.1456	orf19.1456	0.0049995	0.743026	-0.000497452	0.977394	-0.00987596	0.493738	-0.000318283	0.983748	ORF Predicted by Annotation Working Group; possibly spurious ORF (Annotation Working Group prediction)
orf19.1457	orf19.1457	-7.19142e-05	0.995179	-0.00269536	0.672055	-0.00236854	0.661119	0.00874573	0.322643	Predicted ORF in Assemblies 19, 20 and 21
orf19.1458	orf19.1458	-0.00132734	0.829352	-0.00223372	0.694801	0.0038872	0.509135	-0.0048215	0.437917	Predicted ORF in Assemblies 19, 20 and 21
orf19.1459	PPE1	-0.00250284	0.767635	-0.00133005	0.882244	-0.00159472	0.758249	0.00364651	0.490251	Protein similar to S. cerevisiae Ppe1p; shows genetic interaction with some genes involved in diploid filamentous growth and haploid invasive growth in S. cerevisiae
orf19.1460	orf19.1460	0.000892091	0.879269	-0.00162135	0.881609	-0.00379049	0.491613	-0.000475526	0.948258	Putative glutamine-dependent NAD synthetase, involved in NAD salvage pathway
orf19.1461	orf19.1461	0.000906512	0.912284	0.00645241	0.161622	0.0039045	0.255867	0.00727973	0.301679	Predicted ORF in Assemblies 19, 20 and 21; possibly transcriptionally regulated upon hyphal formation
orf19.1466	REX2	0.00978673	0.305748	0.00390355	0.885256	0.00223407	0.839137	0.000598743	0.967432	Predicted ORF in Assemblies 19, 20 and 21; transcription is upregulated in both intermediate and mature biofilms
orf19.1467	COX13	-0.00452524	0.365289	0.0101636	0.182601	-0.00169205	0.846427	-0.00773174	0.427758	Predicted ORF in Assemblies 19, 20 and 21; flucytosine induced; repressed by nitric oxide
orf19.1468	orf19.1468	0.00130973	0.830047	-0.00571608	0.773083	0.00845387	0.0366987	-0.00552731	0.610604	Predicted ORF in Assemblies 19, 20 and 21
orf19.147	YAK1	0.00576803	0.0703301	0.00480565	0.558245	0.00346948	0.326626	0.00130918	0.675548	Predicted serine-threonine protein kinase involved in hyphal growth regulation and biofilm formation; induced in core caspofungin response
orf19.1470	RPS26A	-0.139682	0.0033368	-0.237052	0.0100583	-0.188472	0.0108633	-0.241068	0.0156124	Predicted ribosomal protein; regulated by Nrg1p, Tup1p; genes encoding cytoplasmic ribosomal subunits, translation factors, and tRNA synthetases are downregulated upon phagocytosis by murine macrophage; intron in 5'-UTR
orf19.1471	COX4	0.0075467	0.347196	0.00837576	0.736911	0.0055813	0.42661	-0.00302364	0.783872	Protein described as subunit IV of cytochrome c oxidase; transcription is regulated by Mig1p; macrophage/pseudohyphal-induced gene; macrophage-induced protein; repressed by nitric oxide: intron in 5'-UTR
orf19.1473	orf19.1473	0.00641081	0.336147	0.00609768	0.799679	0.00200308	0.772957	0.00238172	0.792306	Predicted ORF in Assemblies 19, 20 and 21; transcription is induced in response to alpha pheromone in SpiderM medium
orf19.1474	SLA1	-0.0253927	0.0384275	-0.0193142	0.401328	-0.00704213	0.703865	-0.01963	0.427758	Predicted ORF in Assemblies 19, 20 and 21; transcription is regulated by Nrg1p and Mig1p; fungal-specific (no human or murine homolog)
orf19.1476	orf19.1476	-0.00356079	0.588379	0.00193443	0.727897	0.00348821	0.603182	-0.0024791	0.75394	Predicted ORF in Assemblies 19, 20 and 21
orf19.1477	orf19.1477	0.000703235	0.92202	0.0118506	0.075797	-0.000639742	0.891867	-0.00225928	0.816369	Predicted ORF in Assemblies 19, 20 and 21
orf19.1478	orf19.1478	0.0100725	0.022933	0.00425228	0.713033	0.00768162	0.177827	0.00529992	0.305558	Predicted ORF in Assemblies 19, 20 and 21
orf19.1479	orf19.1479	-0.00414831	0.251561	0.000448329	0.926552	-0.00128109	0.736225	-0.00320373	0.439957	Predicted ORF in Assemblies 19, 20 and 21
orf19.1480	orf19.1480	0.00292451	0.770765	0.0121255	0.109137	0.00217925	0.709619	0.0038518	0.495127	Protein described as succinate dehydrogenase, enzyme of citric acid cycle; downregulated by Efg1p; repressed by nitric oxide
orf19.1481	HAP42	0.00358697	0.618695	0.0127519	0.144148	0.00286925	0.814058	-0.000727705	0.952372	Predicted ORF in Assemblies 19, 20 and 21
orf19.1484	orf19.1484	0.00390839	0.428946	0.0031499	0.536222	-0.00400516	0.511256	-0.00932598	0.143779	Predicted ORF in Assemblies 19, 20 and 21
orf19.1485	orf19.1485	0.00469429	0.0790462	0.00449876	0.524455	0.00193139	0.435042	0.00756234	0.382917	Predicted ORF in Assemblies 19, 20 and 21
orf19.1486	orf19.1486	-0.00366606	0.720886	0.000448639	0.965124	-0.00436565	0.269933	0.00759679	0.00553338	Predicted ORF in Assemblies 19, 20 and 21; possibly spurious ORF (Annotation Working Group prediction)
orf19.1490	MSB2	0.00367918	0.741008	0.0124963	0.0400341	0.0025221	0.626323	-0.000194011	0.982983	Mucin family member, possible sensor of cell wall damage; required for Cek1p phosphorylation in response to cell wall stress; transcription is negatively regulated by Rim101p
orf19.1494	RAD23	0.004593	0.401264	0.00156702	0.736911	-0.00210285	0.702909	-0.000519781	0.921812	Predicted ORF in Assemblies 19, 20 and 21
orf19.1495	orf19.1495	-0.00631058	0.304173	-0.0121601	0.426624	-0.0053378	0.285847	-0.00774277	0.433448	Predicted ORF in Assemblies 19, 20 and 21
orf19.1496	orf19.1496	-0.00540743	0.534974	-0.0156289	0.162128	-0.00688956	0.465084	-0.00918648	0.287927	Putative transcription factor with zinc finger DNA-binding motif; possibly spurious ORF (Annotation Working Group prediction)
orf19.1500	orf19.1500	0.0157692	0.0489535	0.0145359	0.16023	-0.00481953	0.63749	0.00798632	0.469554	Predicted ORF in Assemblies 19, 20 and 21
orf19.1502	orf19.1502	0.0240527	0.168341	-0.0143354	0.716535	0.0185667	0.338565	0.0130104	0.706172	Predicted ORF in Assemblies 19, 20 and 21
orf19.1504	orf19.1504	0.0231187	0.133187	-0.01043	0.837564	0.0166895	0.292869	0.0155458	0.537632	Putative patatin-like phospholipase; fungal-specific (no human or murine homolog)
orf19.1506	orf19.1506	0.00105307	0.874152	-0.0113329	0.586862	-0.000521229	0.861846	-0.00497688	0.581118	Predicted ORF in Assemblies 19, 20 and 21; possibly spurious ORF (Annotation Working Group prediction)
orf19.1507	orf19.1507	-0.00167814	0.726348	5.53528e-05	0.994002	-0.00171189	0.762371	0.0026683	0.769425	Predicted ORF in Assemblies 19, 20 and 21; Plc1p-regulated
orf19.1509	ROD1	-0.0010217	0.774935	-0.00238827	0.66598	-8.52846e-05	0.980147	0.0023285	0.518814	Protein not essential for viability; similar to S. cerevisiae Rod1p, which is a membrane protein with a role in drug tolerance; repressed by Rgt1p
orf19.1510	orf19.1510	0.00520166	0.261489	0.00160384	0.781237	0.00399054	0.385745	0.0105963	0.178837	Protein not essential for viability
orf19.1513	FAB1	0.00712455	0.139908	-0.000671171	0.952607	0.00514814	0.317531	0.00930449	0.224076	Phosphatidylinositol 3-phosphate 5-kinase; required for hyphal growth on solid media, and for wild-type vacuolar morphology and acidification; not required for wild-type virulence in mouse systemic infection or for adherence to HeLa cells
orf19.1514	orf19.1514	0.000562335	0.893133	0.00239131	0.860475	0.00329762	0.321559	0.00751635	0.507547	Predicted ORF in Assemblies 19, 20 and 21
orf19.1515	CHT4	0.00506718	0.101359	0.00332663	0.550892	0.00487301	0.359097	0.00242102	0.73455	Chitinase; similar to S. cerevisiae sporulation-specific Cts2p; functionally complements A. gossypii cts2 mutant sporulation defect; homozygous null mutation causes no obvious defects; transcription decreases upon yeast-to-hyphal switch
orf19.1517	ARO3	0.00879807	0.0489535	0.0101634	0.0541861	0.00660021	0.417816	-0.00882536	0.179442	3-Deoxy-D-arabinoheptulosonate-7-phosphate synthase; enzyme of aromatic amino acid biosynthesis; GCN-regulated; feedback-inhibited by phenylalanine when heterologously produced in S. cerevisiae; Aro3p and Aro4p catalyze the same reaction
orf19.1519	orf19.1519	0.00048511	0.946102	0.000597835	0.964502	-0.00490447	0.479973	-0.00220646	0.819838	Predicted ORF in Assemblies 19, 20 and 21
orf19.1522	orf19.1522	0.00324105	0.209884	0.00620114	0.225961	-0.000346002	0.95321	0.00529247	0.278888	Predicted ORF in Assemblies 19, 20 and 21
orf19.1533	orf19.1533	-0.000261	0.973668	0.000236663	0.978295	0.000151975	0.986759	-0.0030108	0.436509	Predicted ORF in Assemblies 19, 20 and 21
orf19.1534	orf19.1534	0.0269021	0.253603	0.00445	0.912418	0.022338	0.339154	0.00301473	0.935006	Protein similar to S. cerevisiae Zrt3p, which is a transporter of zinc ions; predicted Kex2p substrate
orf19.1535	orf19.1535	0.0117799	0.0309685	0.00475926	0.528294	0.00380831	0.503351	0.00581211	0.193547	Predicted ORF in Assemblies 19, 20 and 21; possibly spurious ORF (Annotation Working Group prediction)
orf19.1541	orf19.1541	0.0118072	0.133362	0.00659685	0.562876	0.00824034	0.298538	0.0089009	0.39366	Protein not essential for viability; transcription is repressed in response to alpha pheromone in SpiderM medium
orf19.1544	orf19.1544	0.000532177	0.958467	0.0050272	0.718457	0.000875735	0.929689	-0.00631921	0.416098	Predicted ORF in Assemblies 19, 20 and 21
orf19.1545	orf19.1545	-0.00250281	0.421062	-0.00290996	0.46191	0.00206382	0.712391	-0.00320414	0.42779	Predicted ORF in Assemblies 19, 20 and 21
orf19.1546	orf19.1546	0.00168911	0.369826	-0.00214428	0.744186	0.00306867	0.702357	-0.000962774	0.76654	Predicted ORF in Assemblies 19, 20 and 21
orf19.1547	orf19.1547	0.00362548	0.377289	0.000570689	0.926552	0.000226988	0.910874	-6.90258e-05	0.984119	Predicted ORF in Assemblies 19, 20 and 21
orf19.1549	orf19.1549	0.00559063	0.379241	0.00341809	0.579967	0.00746837	0.140224	0.00445325	0.382033	Predicted ORF in Assemblies 19, 20 and 21; repressed by nitric oxide; identified in detergent-resistant membrane fraction (possible lipid raft component); predicted transmembrane helix
orf19.155	URE2	0.00160227	0.691657	0.000360877	0.940439	0.00265394	0.410718	0.00180749	0.59408	Functional homolog of S. cerevisiae Ure2p, which is a regulator of nitrogen utilization, and which also has a prion form called [URE3]
orf19.1551	orf19.1551	0.00437359	0.391382	0.000554493	0.93832	0.00474162	0.285847	0.00151514	0.42779	Predicted ORF in Assemblies 19, 20 and 21
orf19.1555	SAC3	-0.00644735	0.775983	-0.000566441	0.975529	-0.00374024	0.724508	-0.0235979	0.126276	Predicted ORF in Assemblies 19, 20 and 21
orf19.1557	orf19.1557	-0.0332877	0.100785	-0.00429118	0.782899	-0.00636834	0.72992	-0.0240339	0.535316	Predicted ORF in Assemblies 19, 20 and 21
orf19.156	FGR51	0.0161343	0.209882	0.0126482	0.341943	0.00792641	0.303479	-0.00160967	0.891952	Protein lacking an ortholog in S. cerevisiae; transposon mutation affects filamentous growth
orf19.1560	POB3	-0.00523333	0.640628	0.00568317	0.380458	0.00474091	0.454057	0.00393659	0.738498	Protein similar to S. cerevisiae Pob3p, which is involved in chromatin assembly and disassembly; transposon mutation affects filamentous growth
orf19.1563	ECM3	0.00478509	0.617259	-0.00544682	0.704266	-0.000526996	0.964819	-0.00747857	0.894692	Predicted ORF in Assemblies 19, 20 and 21
orf19.1564	orf19.1564	0.00500738	0.459031	-0.0253837	0.480457	-0.011506	0.294765	-0.00750429	0.271926	Predicted ORF in Assemblies 19, 20 and 21
orf19.1565	orf19.1565	0.00789768	0.495097	0.00886003	0.462912	0.0123261	0.120427	0.00624361	0.511294	Putative transcription factor with zinc finger DNA-binding motif
orf19.1566	UTP21	0.0100757	0.273357	0.0109303	0.0482189	0.00634216	0.408147	0.00836006	0.229082	Predicted ORF in Assemblies 19, 20 and 21; physically interacts with TAP-tagged Nop1p
orf19.1571	orf19.1571	0.00160195	0.624504	0.000962247	0.911163	-1.37622e-05	0.996236	0.00374743	0.65312	Predicted ORF in Assemblies 19, 20 and 21
orf19.1573	orf19.1573	0.0130483	0.111676	0.00769394	0.273085	0.00532612	0.390269	0.0061405	0.58124	Predicted ORF in Assemblies 19, 20 and 21
orf19.1574	orf19.1574	-0.0044889	0.550542	0.0086992	0.233066	0.00514818	0.477584	0.00157809	0.857027	Predicted ORF in Assemblies 19, 20 and 21
orf19.1575	PRS1	0.0134868	0.430717	0.0141944	0.549198	0.00782918	0.764716	-0.00560135	0.815301	Phosphoribosylpyrophosphate synthetase; enzyme of purine, pyrimidine, histidine, and tryptophan biosynthesis; essential; flucytosine induced; macrophage/pseudohyphal-induced
orf19.1576	orf19.1576	-0.0020427	0.836137	0.0067908	0.307352	0.000841517	0.936293	0.00633357	0.113329	Predicted ORF in Assemblies 19, 20 and 21
orf19.1577	orf19.1577	0.00514791	0.728672	0.00829581	0.580243	-0.00207923	0.786155	-0.0018195	0.904802	Predicted ORF in Assemblies 19, 20 and 21
orf19.1578	orf19.1578	0.000542024	0.953731	-0.00337925	0.736306	0.0055258	0.449374	0.00353081	0.590699	Predicted ORF in Assemblies 19, 20 and 21
orf19.1580	orf19.1580	0.00436202	0.623208	0.0117462	0.466703	-0.0131513	0.539605	0.00147401	0.957796	Predicted ORF in Assemblies 19, 20 and 21
orf19.1581	orf19.1581	0.0090274	0.475011	-0.00863913	0.528294	0.0132205	0.227147	-0.0278402	0.45436	Predicted ORF in Assemblies 19, 20 and 21
orf19.1582	orf19.1582	-0.00477103	0.173436	-0.00240759	0.803769	-0.00339807	0.549657	-0.000887906	0.901468	Predicted membrane transporter, member of the drug:proton antiporter (12 spanner) (DHA1) family, major facilitator superfamily (MFS)
orf19.1584	orf19.1584	0.00779902	0.144148	0.000752966	0.952607	0.00609658	0.142843	0.00133606	0.445384	Predicted membrane transporter, member of the monocarboxylate porter (MCP) family, major facilitator superfamily (MFS); shows colony morphology-related gene regulation by Ssn6p
orf19.1585	ZRT2	0.00731814	0.486794	0.000301301	0.975404	0.0105055	0.137236	-0.00084707	0.904462	Protein described as predicted zinc transporter; ciclopirox olamine, fluconazole, or alkaline downregulated; transcriptionally induced by interaction with macrophage; amphotericin B induced
orf19.1587	HGT20	0.0051091	0.488888	-0.00408417	0.895637	0.0174534	0.0828965	0.00298335	0.818372	Putative glucose transporter of the major facilitator superfamily; the C. albicans glucose transporter family comprises 20 members; 12 probable membrane-spanning segments; regulated by Nrg1p
orf19.1588	orf19.1588	0.00179241	0.391382	0.0016481	0.454711	0.00200543	0.499481	0.00360508	0.0976835	Predicted ORF in Assemblies 19, 20 and 21
orf19.1589	orf19.1589	0.00483915	0.21646	0.00503858	0.344647	0.00552899	0.226626	0.00113458	0.853023	Putative DNA-binding transcription factor
orf19.1591	ERG10	-0.0102626	0.122585	-0.0117896	0.320301	-0.00705598	0.22481	-0.010978	0.130045	Protein similar to acetyl-CoA acetyltransferase; role in ergosterol biosynthesis; soluble in hyphae; changes in protein abundance associated with azole resistance; fluconazole or ketoconazole induced; macrophage-downregulated protein
orf19.1591	ERG10	-0.000117867	0.98162	0.000537851	0.936798	-0.00249817	0.650734	0.00583726	0.333136	Protein similar to acetyl-CoA acetyltransferase; role in ergosterol biosynthesis; soluble in hyphae; changes in protein abundance associated with azole resistance; fluconazole or ketoconazole induced; macrophage-downregulated protein
orf19.1592	orf19.1592	0.0113071	0.0947782	-0.0082587	0.641093	0.0110348	0.0725216	0.010977	0.34721	Predicted ORF in Assemblies 19, 20 and 21
orf19.1595	orf19.1595	-0.00745221	0.391741	0.00778819	0.436532	0.000202344	0.955069	-0.0101147	0.0764627	Predicted ORF in Assemblies 19, 20 and 21
orf19.1596	FGR28	0.00345486	0.736828	-0.00137978	0.892387	0.000518987	0.925133	-0.00406611	0.505803	Protein lacking an ortholog in S. cerevisiae; transposon mutation affects filamentous growth; possibly spurious ORF (Annotation Working Group prediction)
orf19.1597	ABG1	-0.0111425	0.104913	-0.00936954	0.363912	-0.0209602	0.444181	-0.00682346	0.382464	Vacuolar membrane protein; depletion causes abnormal vacuolar morphology, cell separation defect, sensitivity to cell wall perturbation, and increased hyphal branching; essential gene with no mammalian homolog; Cyr1p-regulated
orf19.1600	orf19.1600	0.0112415	0.188985	-0.00827224	0.269177	0.00168761	0.898135	0.010072	0.114322	Predicted ORF in Assemblies 19, 20 and 21
orf19.1601	RPL3	0.00857524	0.137412	0.00170106	0.795085	-0.0155702	0.221786	-0.00235743	0.839489	Putative ribosomal protein; similar to S. cerevisiae Rpl3p; gene induced by ciclopirox olamine treatment; genes encoding cytoplasmic ribosomal subunits are downregulated upon phagocytosis by murine macrophage
orf19.1605	PMS1	0.00552299	0.397692	0.00883808	0.274922	0.00313241	0.787198	0.0084821	0.49139	Protein described as DNA mismatch repair factor; ortholog of S. cerevisiae PMS1 which is an ATP-binding protein involved in DNA mismatch repair
orf19.1606	orf19.1606	0.00858345	0.122998	0.002764	0.560593	0.00659858	0.220286	0.00757493	0.177295	Predicted ORF in Assemblies 19, 20 and 21; Plc1p-regulated
orf19.1607	ALR1	-0.000516813	0.88627	0.00240897	0.456261	-2.06281e-05	0.995836	0.000235103	0.942671	Putative transporter of divalent cations; hyphal-induced expression; fungal-specific (no human or murine homolog)
orf19.1611	orf19.1611	-0.00111711	0.847603	0.00561191	0.324273	-0.000712972	0.93954	0.0147788	0.0188256	Predicted ORF in Assemblies 19, 20 and 21
orf19.1613	ILV2	0.00313037	0.586498	0.00505118	0.590658	0.00410294	0.266372	0.0125393	0.246016	Protein described as acetolactate synthase; regulated by Gcn4p; induced in response to amino acid starvation (3-aminotriazole treatment); protein detected by mass spec in stationary phase cultures
orf19.1614	MEP1	0.00789495	0.0835096	0.0057792	0.502173	0.00403529	0.294505	0.00684326	0.0992897	Ammonium permease; Mep1p is a more efficient ammonium permease than Mep2p, whereas Mep2p has additional regulatory role; not essential for viability; 11 predicted transmembrane regions; low mRNA abundance; hyphal downregulated
orf19.1616	FGR23	-0.00452117	0.181052	0.0013424	0.773083	-0.00179473	0.564181	0.00151089	0.811806	Protein lacking an ortholog in S. cerevisiae; transposon mutation affects filamentous growth; transcriptionally repressed by A1p and Alpha2p in white-phase cells, a-specific and induced by alpha factor
orf19.1617	orf19.1617	-0.0223558	0.0767683	-0.00904297	0.464205	-0.018857	0.182161	-0.0327154	0.044563	Protein similar to S. cerevisiae Ydr282cp; transposon mutation affects filamentous growth
orf19.1618	GFA1	-0.0379237	0.460075	-0.119979	0.549198	-0.017807	0.706658	-0.0134691	0.777962	Glucosamine-6-phosphate synthase; enzyme of chitin/hexosamine biosynthesis; homotetrameric; inhibited by UDP-GlcNAc, FMDP, N-acyl peptide, kanosamine-6-P; functional homolog of S. cerevisiae Gfa1p; growth-phase regulated; catalytic Cys
orf19.1621	GPA2	-0.00524698	0.251987	-0.00230069	0.320082	0.00384794	0.288184	0.00385661	0.464445	G-protein alpha subunit; regulates filamentous growth; reports differ on a role in cAMP-mediated glucose signaling, cAMP-PKA pathway, MAP kinase cascade; Gpr1p C terminus binds Gpa2p; regulates HWP1 and ECE1
orf19.1622	YCG1	0.00396809	0.245131	0.00680975	0.198707	-0.00100267	0.863112	0.0098079	0.285319	Predicted ORF in Assemblies 19, 20 and 21
orf19.1624	orf19.1624	0.00715995	0.277885	0.0148305	0.1464	0.00933707	0.197568	-0.0113908	0.548801	Predicted ORF in Assemblies 19, 20 and 21
orf19.1625	orf19.1625	0.0112404	0.397692	0.0127282	0.567513	0.00793728	0.46446	0.0161057	0.200085	Predicted ORF in Assemblies 19, 20 and 21; repressed by nitric oxide
orf19.1631	ERG6	-0.0593376	0.0110991	-0.0804947	0.0929926	-0.0538688	0.0122925	-0.14293	0.101308	Delta(24)-sterol C-methyltransferase, converts zymosterol to fecosterol in ergosterol biosynthesis by methylating position C-24; mutation confers nystatin resistance; fluconazole-induced; transcription increased in azole-resistant strain
orf19.1631	ERG6	0.010225	0.227997	-0.000950494	0.936798	0.0200207	0.0323615	-0.0178536	0.237403	Delta(24)-sterol C-methyltransferase, converts zymosterol to fecosterol in ergosterol biosynthesis by methylating position C-24; mutation confers nystatin resistance; fluconazole-induced; transcription increased in azole-resistant strain
orf19.1632	orf19.1632	0.0012906	0.650469	0.00190421	0.70319	0.00408712	0.535551	0.00053849	0.915925	Predicted ORF in Assemblies 19, 20 and 21
orf19.1634	orf19.1634	-0.00485517	0.469315	0.00182935	0.657921	0.00102965	0.757415	0.000579541	0.912622	Predicted ORF in Assemblies 19, 20 and 21
orf19.1636	STE50	0.00218619	0.410741	0.000535313	0.89953	0.00141731	0.679256	0.00446126	0.182246	Protein with sterile alpha motif (SAM) and Ras-associated domain (RAD); similar to S. cerevisiae Rad50p, which is involved in signal transduction via interaction with and regulation of MAPKKK
orf19.1637	orf19.1637	0.0031411	0.318103	0.00217332	0.23202	0.000109389	0.964819	0.000242206	0.929769	Predicted ORF in Assemblies 19, 20 and 21
orf19.1638	orf19.1638	-0.00768595	0.411218	0.00423907	0.525761	0.00257137	0.465084	-0.000639455	0.929482	Predicted ORF in Assemblies 19, 20 and 21
orf19.1639	orf19.1639	-0.00876278	0.368278	0.00471779	0.8827	0.000233341	0.975852	-0.00859779	0.483818	Predicted ORF in Assemblies 19, 20 and 21
orf19.1641	orf19.1641	0.00728078	0.089472	0.0122374	0.122351	0.000647831	0.935296	0.0135443	0.00631257	Predicted ORF in Assemblies 19, 20 and 21
orf19.1646	orf19.1646	-0.000559865	0.902573	0.000167312	0.97848	-0.0017006	0.663441	0.00068299	0.941358	Predicted ORF in Assemblies 19, 20 and 21
orf19.1647	orf19.1647	-0.00264729	0.85291	0.00266197	0.785516	0.00993728	0.115156	-0.000534852	0.955651	Predicted ORF in Assemblies 19, 20 and 21
orf19.1648	RAD50	0.00128876	0.740458	0.00488822	0.617041	0.00335088	0.260509	0.00967832	0.157279	Protein described as DNA double-strand break repair factor; involved in response to oxidative stress and drug resistance
orf19.1649	RNA1	0.00103368	0.84079	-0.00728021	0.802543	0.0116251	0.232935	-0.0122481	0.580284	Predicted ORF in Assemblies 19, 20 and 21; protein level decreased in stationary phase cultures
orf19.1652	POX1-3	-0.000890936	0.777044	0.00272599	0.309379	0.00227073	0.292654	0.00253275	0.430399	Predicted acyl-CoA oxidase; farnesol regulated; protein detected by mass spec in stationary phase cultures
orf19.1653	orf19.1653	0.00168972	0.845125	-0.00235254	0.805878	0.00967399	0.154503	-0.0138574	0.389989	Predicted ORF in Assemblies 19, 20 and 21; possibly spurious ORF (Annotation Working Group prediction)
orf19.1654	orf19.1654	0.00100272	0.80046	0.00634087	0.163589	0.00251943	0.32178	0.00667326	0.256949	Predicted ORF in Assemblies 19, 20 and 21; increased expression in response to prostaglandins
orf19.1655	PXP2	0.00561118	0.843183	-0.00858242	0.685	-0.0194705	0.177827	-0.00155105	0.939977	Putative acyl-CoA oxidase; enzyme of fatty acid beta-oxidation; induced during macrophage infection; expression is opaque specific; has putative peroxisome targeting signal
orf19.1656	orf19.1656	-0.00826525	0.365087	0.00174547	0.846102	-0.00293982	0.69789	-0.00121907	0.897348	Predicted ORF in Assemblies 19, 20 and 21
orf19.166	ASG1	-0.000800598	0.837537	0.00680947	0.205793	-0.00024846	0.964534	0.001041	0.896807	Predicted zinc-finger protein of unknown function; has similarity to S. cerevisiae Asg1p, which is a proposed transcription factor of the Gal4p family
orf19.1664	orf19.1664	0.00329188	0.224021	-0.00714246	0.344906	0.00239386	0.473719	1.23808e-05	0.995787	Predicted ORF in Assemblies 19, 20 and 21; decreased expression observed in an ssr1 homozygous null mutant
orf19.1665	MNT1	-0.00071026	0.863336	0.000336048	0.928817	0.00256121	0.345289	0.00324598	0.289576	Alpha-1,2-mannosyl transferase; adds second mannose during cell-wall mannoprotein biosynthesis; required for wild-type virulence and adherence to epithelial cells; predicted type II membrane protein of Golgi; fungal-specific
orf19.1667	orf19.1667	0.00543072	0.194441	0.000587569	0.923083	0.000855939	0.796799	0.00371186	0.202838	Predicted ORF in Assemblies 19, 20 and 21
orf19.1668	orf19.1668	0.0016267	0.391382	0.00357465	0.42019	0.00540586	0.329739	0.00393633	0.507493	Predicted ORF in Assemblies 19, 20 and 21; decreased expression observed in an ssr1 homozygous null mutant; possibly spurious ORF (Annotation Working Group prediction)
orf19.1671	UTR2	-0.00650812	0.625349	-0.005995	0.273215	0.00235254	0.476613	-0.00363353	0.407725	Putative glycosidase; cell wall; role in adhesion; required for hyphal growth on Spider (not serum) medium; chitin-binding, glycosyl hydrolase, GPI anchor domains; induced during cell wall regeneration; mRNA detected in yeast-form cells
orf19.1672	orf19.1672	-0.0019992	0.811428	-0.00675593	0.505173	-0.0024505	0.809336	0.00564965	0.623129	Predicted ORF in Assemblies 19, 20 and 21
orf19.1675	orf19.1675	-0.0190547	0.11499	-0.00931302	0.528294	-0.00922942	0.369115	-0.0105993	0.333188	Predicted ORF in Assemblies 19, 20 and 21
orf19.1676	orf19.1676	0.00261081	0.429935	6.68145e-05	0.99451	0.00453725	0.298538	0.00442012	0.271753	Predicted ORF in Assemblies 19, 20 and 21
orf19.1677	orf19.1677	0.00313816	0.513417	-0.00807397	0.198707	0.000387349	0.944035	0.00277601	0.758639	Predicted ORF in Assemblies 19, 20 and 21; possibly spurious ORF (Annotation Working Group prediction)
orf19.1678	orf19.1678	-0.0140606	0.184155	0.0115791	0.339285	-0.00836287	0.430965	-0.0144273	0.105319	Predicted ORF in Assemblies 19, 20 and 21
orf19.1679	orf19.1679	-0.0642117	0.122998	-0.21697	0.150708	-0.203428	0.0943977	-0.0994629	0.0105987	Predicted ORF in Assemblies 19, 20 and 21
orf19.1680	orf19.1680	-0.000283961	0.932376	0.00469437	0.237927	0.00261348	0.375604	0.000905097	0.737786	Predicted ORF in Assemblies 19, 20 and 21; protein detected by mass spec in stationary phase cultures
orf19.1682	orf19.1682	-0.00538234	0.434778	-0.0109669	0.49504	-0.00135593	0.8606	-0.013672	0.0856891	Predicted ORF in Assemblies 19, 20 and 21; repressed by nitric oxide
orf19.1684	orf19.1684	-0.00405587	0.621142	0.00110378	0.879892	0.00032777	0.914964	0.00185868	0.586584	Predicted ORF in Assemblies 19, 20 and 21
orf19.1685	ZCF7	0.00663264	0.489007	0.00475062	0.60251	0.00999187	0.111988	0.0106475	0.0842617	Predicted zinc-finger protein of unknown function
orf19.1686	orf19.1686	0.000576854	0.932068	0.00599718	0.592495	-0.00582354	0.496648	0.00594765	0.57899	Predicted ORF in Assemblies 19, 20 and 21
orf19.1687	orf19.1687	0.0137995	0.130088	0.00823882	0.338346	0.0114746	0.100828	0.0126366	0.0964201	Predicted ORF in Assemblies 19, 20 and 21
orf19.1690	TOS1	-0.259111	0.00556332	-0.165785	0.225961	-0.303742	0.00499718	-0.267593	0.00139024	Protein described as similar to alpha agglutinin anchor subunit; exogenously expressed protein is a substrate for Kex2p processing in vitro; fluconazole-induced; transcription is induced in response to alpha pheromone in SpiderM medium
orf19.1693	CAS4	0.00505303	0.401264	-0.00124102	0.961787	0.00290581	0.618251	-0.00515012	0.562615	Protein of RAM cell wall integrity signaling network; role in cell separation, azole sensitivity; required for hyphal growth; insertion mutation near 3' end of gene causes increase in caspofungin sensitivity; pheromone/hyphal induced
orf19.1698	orf19.1698	0.00297815	0.637542	0.00518782	0.421094	-0.00495509	0.420455	0.00781358	0.0284363	Predicted ORF in Assemblies 19, 20 and 21
orf19.1699	BZZ1	0.009184	0.266265	0.00377831	0.686913	0.0113243	0.182615	0.0119341	0.0833176	Protein similar to S. cerevisiae Bzz1p, which is an SH3 domain protein involved in the regulation of actin polymerization
orf19.17	SCP1	-0.00457544	0.480556	-0.00107019	0.841999	-0.00500764	0.764246	0.0104071	0.0781256	Predicted ORF in Assemblies 19, 20 and 21; constitutive expression independent of MTL or white-opaque status
orf19.1701	RKI1	0.00652179	0.161074	-0.00329265	0.601547	0.00313848	0.316836	0.00870745	0.222567	Predicted ORF in Assemblies 19, 20 and 21
orf19.1706	MET18	-0.00514872	0.0825731	0.00127922	0.886968	-0.0026339	0.404469	-0.00393016	0.290097	Predicted ORF in Assemblies 19, 20 and 21; Plc1p-regulated
orf19.171	DBP2	0.00179953	0.778023	-0.00997162	0.583438	0.00112771	0.828957	-0.00779222	0.490251	Predicted ORF in Assemblies 19, 20 and 21; flucytosine induced; downregulated in core stress response
orf19.1711	END3	0.0238349	0.257769	0.0200272	0.803088	0.0558306	0.229487	0.00636998	0.884656	Regulated by Gcn4p; induced in response to amino acid starvation (3-aminotriazole treatment)
orf19.1712	GEA2	0.00370832	0.133808	0.00360693	0.107171	4.7093e-05	0.991121	0.00250989	0.481681	Protein described as an ARF GTP/GDP exchange factor; transcriptionally regulated by iron; expression greater in low iron
orf19.1715	IRO1	-0.0246578	0.00570842	-0.03538	0.0379046	-0.00424667	0.585637	-0.03007	0.00547355	Putative transcription factor; role in iron utilization, pathogenesis; both IRO1 and adjacent URA3 are mutated in strain CAI4; suppresses S. cerevisiae aft1 mutant low-iron growth defect; hyphal-induced; reports differ about iron regulation
orf19.1717	orf19.1717	-0.00039351	0.92202	0.00568272	0.47352	-0.0105557	0.448262	-0.0057829	0.675012	Predicted ORF in Assemblies 19, 20 and 21
orf19.1718	ZCF8	0.00445517	0.630853	0.00209522	0.853563	-0.00610129	0.400991	-0.0101215	0.188732	Predicted zinc-finger protein of unknown function; decreased transcription is observed upon fluphenazine treatment
orf19.172	RPC19	0.00306963	0.404428	-0.000505435	0.952607	-0.00144255	0.716751	-0.00378632	0.511133	Predicted ORF in Assemblies 19, 20 and 21; transcription is upregulated in both intermediate and mature biofilms
orf19.1720	orf19.1720	0.00158104	0.373943	0.00148318	0.716178	-0.0016128	0.386913	0.00227312	0.680217	Predicted ORF in Assemblies 19, 20 and 21
orf19.1723	orf19.1723	-0.0231365	0.00738614	-0.0184111	0.00940462	-0.00766497	0.275731	-0.0144964	0.0258257	Predicted ORF in Assemblies 19, 20 and 21
orf19.1725	orf19.1725	-0.00051001	0.893133	0.00197268	0.480457	0.00173315	0.684048	0.0038781	0.358003	Predicted ORF in Assemblies 19, 20 and 21
orf19.1727	PMC1	0.00587763	0.164627	0.00407307	0.581574	0.0046379	0.251811	-0.000873527	0.91457	Vacuolar calcium P-type ATPase; transcription is regulated by calcineurin and fluconazole; mutant shows increased resistance to fluconazole or lithium, and increased sensitivity to calcium
orf19.1728	orf19.1728	-0.0218563	0.401264	-0.151169	0.368877	-0.000959225	0.860564	9.60222e-05	0.988716	Predicted ORF in Assemblies 19, 20 and 21
orf19.173	orf19.173	0.00503049	0.27231	0.00606627	0.214658	0.00613291	0.102562	0.0106499	0.26093	Putative transcription factor with zinc finger DNA-binding motif; transcriptionally activated by Mnl1p under weak acid stress
orf19.1734	orf19.1734	-0.00600485	0.554116	-0.0240596	0.225973	-0.00626672	0.477505	-0.0120364	0.267165	Predicted ORF in Assemblies 19, 20 and 21; heterozygous null mutant displays sensitivity to virgineone
orf19.1735	orf19.1735	-0.00426671	0.370205	-0.00494989	0.44249	-0.00401668	0.37227	-0.00341482	0.250185	Predicted ORF in Assemblies 19, 20 and 21
orf19.1736	orf19.1736	0.00986573	0.273132	0.0175727	0.124388	0.00183211	0.888027	-0.00433039	0.907214	Predicted ORF in Assemblies 19, 20 and 21
orf19.1737	orf19.1737	-0.00136461	0.817674	0.00592378	0.37083	0.00457335	0.0889673	0.00685821	0.413252	Predicted ORF in Assemblies 19, 20 and 21; possibly spurious ORF (Annotation Working Group prediction)
orf19.1738	UGP1	-0.0685227	0.00577088	-0.0697848	0.0379046	-0.0627221	0.0108633	-0.0951832	0.0362642	Protein similar to UTP-glucose-1-phosphaturidyl transferase; localizes to cell surface of yeast-form cells, but not hyphal cells; Hog1p-downregulated; protein detected by mass spec in stationary phase cultures
orf19.1741	DIT1	0.0107443	0.259817	0.00411752	0.632416	0.00746816	0.245303	0.0070125	0.421653	Protein described as spore wall maturation protein; predicted ORF in Assemblies 19, 20 and 21
orf19.1742	HEM3	-0.0161422	0.36081	-0.000834247	0.985269	0.00384648	0.871593	-0.0394525	0.447581	Hydroxymethylbilane synthase (uroporphyrinogen I synthase); catalyzes conversion of 4-porphobilinogen to hydroxymethylbilane, the third step in the heme biosynthetic pathway; transcription greater in high iron, CO2; alkaline downregulated
orf19.1743	ACS1	0.000166281	0.988949	0.00817174	0.682429	0.00587353	0.612726	0.0111937	0.353684	Putative acetyl-CoA synthetase, similar to S. cerevisiae Acs1p; upregulated in the presence of human neutrophils; fluconazole-downregulated; regulated by Nrg1p and Mig1p; shows colony morphology-related gene regulation by Ssn6p
orf19.1744	HEM4	0.00671151	0.178761	0.00530215	0.512489	0.00476044	0.116829	0.00775284	0.0906056	Protein described as uroporphyrinogen III synthase; transcriptionally regulated by iron; expression greater in high iron or elevated CO2; alkaline downregulated
orf19.1746	orf19.1746	0.00459881	0.401264	0.000183361	0.993216	0.00317759	0.274021	0.00463088	0.617773	Predicted ORF in Assemblies 19, 20 and 21; similar to S. cerevisiae meiosis-specific, spore-wall-localized protein Ssp2p, which is required for wild-type formation of outer spore wall in S. cerevisiae
orf19.1747	KIP2	0.00568042	0.281398	0.00386278	0.466703	0.000291193	0.964819	0.000265254	0.965388	Protein similar to S. cerevisiae Kip2p; transcription is repressed in response to alpha pheromone in SpiderM medium; periodic mRNA expression, peak at cell-cycle G2/M phase
orf19.1750	orf19.1750	-0.00134771	0.714351	-0.00382746	0.245824	-0.000478917	0.872483	0.00407554	0.369047	Predicted ORF in Assemblies 19, 20 and 21; similar to mammalian SR-like RNA splicing factor; gene has intron; significant changes made to ORF with coordinate updates (see Locus History)
orf19.1751	SPT23	-0.00137899	0.573328	0.00299527	0.628822	-0.000665672	0.861051	0.00237767	0.435459	Protein involved in regulation of unsaturated fatty acid biosynthesis; controls the expression of the Ole1p delta-9-fatty acid desaturase
orf19.1754	orf19.1754	0.00848496	0.2493	-0.0101087	0.498481	0.0124429	0.189379	0.0104148	0.279662	Predicted ORF in Assemblies 19, 20 and 21
orf19.1755	SET2	0.00720164	0.181778	0.00252877	0.773083	-0.000445587	0.968092	-0.00060792	0.974413	Predicted ORF in Assemblies 19, 20 and 21
orf19.1756	GPD1	0.0118229	0.184443	-0.00420684	0.481227	0.00581892	0.221786	0.00901443	0.336058	Protein similar to S. cerevisiae glycerol-3-phosphate dehydrogenase (enzyme of glycerol biosynthesis); biofilm-induced expression; regulated by Efg1p; regulated by Tsa1p, Tsa1Bp under H2O2 stress conditions
orf19.1757	orf19.1757	0.000797299	0.902573	-0.00835339	0.436532	0.00080879	0.887086	-0.00149282	0.83709	Putative transcription factor with zinc finger DNA-binding motif; transcription is upregulated in clinical isolates from HIV+ patients with oral candidiasis
orf19.1759	PHO23	-0.0031941	0.673249	0.00498431	0.583438	0.00288305	0.445333	-0.00342771	0.580284	Protein not essential for viability; similar to S. cerevisiae Pho23p, which is a probable component of the Rpd3 histone deacetylase complex
orf19.176	OPT4	-0.00049212	0.902573	-0.00306323	0.320301	-0.00395176	0.317267	-0.0024191	0.279749	Oligopeptide transporter; detected at germ tube plasma membrane by mass spectrometry; transcriptionally induced upon phagocytosis by macrophage; fungal-specific (no human or murine homolog); merged with orf19.2292 in Assembly 20
orf19.1760	RAS1	-0.275625	0.101147	-0.274367	0.126408	-0.267243	0.137807	-0.249276	0.166408	RAS signal transduction GTPase; regulates cAMP and MAP kinase pathways; role in hyphal induction, virulence, apoptosis, heat-shock sensitivity; nonessential; glutamine-rich C terminus; complements viability of S. cerevisiae ras1 ras2 mutant
orf19.1764	orf19.1764	0.00492306	0.771787	0.011656	0.492471	0.00176958	0.914326	-0.00644863	0.453935	Predicted ORF in Assemblies 19, 20 and 21
orf19.1767	orf19.1767	0.00825375	0.168341	0.0060752	0.465058	0.00726385	0.0986619	0.00795169	0.139209	Predicted ORF in Assemblies 19, 20 and 21
orf19.1771	orf19.1771	0.00484895	0.210692	0.00256783	0.40669	-0.00752566	0.499322	0.00243576	0.605487	Predicted ORF in Assemblies 19, 20 and 21
orf19.1774	orf19.1774	0.00945001	0.679691	0.00535763	0.906647	-0.00111586	0.901022	-0.000868047	0.980824	Predicted ORF in Assemblies 19, 20 and 21; transcription is upregulated in an RHE model of oral candidiasis; virulence-group-correlated expression
orf19.1777	orf19.1777	0.00365317	0.600134	0.00474766	0.496653	0.00595144	0.271634	-0.00209681	0.811717	Predicted ORF in Assemblies 19, 20 and 21
orf19.1778	orf19.1778	0.00710681	0.207512	0.00870811	0.196067	0.00291043	0.362358	0.00632702	0.366323	Predicted ORF in Assemblies 19, 20 and 21
orf19.1779	MP65	0.0035941	0.539705	-0.0225149	0.429792	0.006762	0.520063	-0.00404739	0.778846	Cell surface mannoprotein; mycelial antigen; possible role in cell-wall glucan metabolism; has adhesin motif; O-glycosylation but no predicted N-glycosylation; induced by heat, upon germ tube formation, wall regeneration; diagnostic marker
orf19.178	orf19.178	0.0064069	0.0980782	0.00358485	0.28149	0.0057481	0.168313	0.00316305	0.514254	Predicted ORF in Assemblies 19, 20 and 21
orf19.1780	orf19.1780	0.00275946	0.644591	-0.0054753	0.5198	0.00419135	0.35604	-0.00375675	0.576211	Predicted ORF in Assemblies 19, 20 and 21
orf19.1782	orf19.1782	-6.35737e-05	0.993382	0.00109275	0.95472	0.00231049	0.799753	-0.00355767	0.707956	Predicted ORF in Assemblies 19, 20 and 21
orf19.1783	YOR1	-0.00427435	0.366718	-0.0145206	0.107171	-0.0148392	0.182615	-0.00508358	0.416193	Protein similar to S. cerevisiae Yor1p, which is a plasma membrane transporter of the ATP-binding cassette (ABC) family involved in resistance to aureobasidin A; transcription is specific to white cell type
orf19.1789.1	LYS1	0.00429124	0.576576	0.00665727	0.435187	0.00237591	0.853858	0.00321881	0.411737	Saccharopine dehydrogenase (biosynthetic); enzyme of alpha-aminoadipate lysine biosynthesis pathway; functionally complements S. cerevisiae lys1 mutation; fungal-specific (no human or murine homolog)
orf19.1791	orf19.1791	-5.82392e-05	0.994274	-0.00134877	0.906385	0.0030468	0.4601	0.0084471	0.42779	Predicted ORF in Assemblies 19, 20 and 21
orf19.1792	orf19.1792	-0.00336595	0.642713	0.00176837	0.876576	0.00845704	0.129686	0.00286257	0.675012	Predicted ORF in Assemblies 19, 20 and 21
orf19.1793	orf19.1793	0.00567212	0.138324	0.00367465	0.643604	0.00421204	0.43755	0.00395962	0.417232	Protein not essential for viability
orf19.1794	orf19.1794	0.00478338	0.459087	0.000596733	0.926824	0.0027731	0.368229	0.00221496	0.446873	Predicted ORF in Assemblies 19, 20 and 21
orf19.1795	PUF3	0.00517395	0.262651	-0.000847671	0.926552	0.00332126	0.469515	0.00826118	0.171039	Protein not essential for viability; similar to S. cerevisiae Puf3p, which is an mRNA-binding protein involved in RNA catabolism
orf19.1797	orf19.1797	-0.00100741	0.83875	0.00237415	0.668983	0.00658422	0.433501	0.004696	0.453178	Predicted ORF in Assemblies 19, 20 and 21; induced upon biofilm formation; has GutQ domain, which is associated with phosphosugar binding
orf19.1798	TSC2	0.00645979	0.54233	-0.00127354	0.952732	0.00661839	0.310964	0.0121335	0.114579	Putative GTPase-activating protein involved in control of filamentous growth; not essential for viability; similar to mammalian tuberin
orf19.1799	orf19.1799	0.00376417	0.397692	-0.00364116	0.791433	0.00274	0.650515	0.00976259	0.483998	Putative general amino acid permease; fungal-specific (no human or murine homolog)
orf19.18	IMH3	-0.0015823	0.929673	0.00152407	0.904184	0.0121538	0.579032	-0.0284219	0.22199	Inosine monophosphate (IMP) dehydrogenase; enzyme of GMP biosynthesis; target of mycophenolic acid and mizoribine monophosphate; antigenic during human or murine infection; soluble protein in hyphae; downregulated in core stress response
orf19.1800	orf19.1800	0.011536	0.0703301	0.00739746	0.474179	0.0103219	0.0921229	0.00354739	0.743924	Predicted ORF in Assemblies 19, 20 and 21
orf19.1801	orf19.1801	0.00232414	0.434742	0.00390219	0.66486	0.000628931	0.887899	-0.00622679	0.295091	Predicted ORF in Assemblies 19, 20 and 21
orf19.1802	orf19.1802	-0.076243	0.0313803	-0.203171	0.0225172	-0.108204	0.0666128	-0.145471	0.0258257	Predicted ORF in Assemblies 19, 20 and 21; decreased expression in response to prostaglandins
orf19.1803	CDC43	-0.00269428	0.465537	-0.00112511	0.841999	-0.00238051	0.472452	0.00321939	0.319024	Beta subunit of heterodimeric protein geranylgeranyltransferase type I; GGTase I enzyme binds zinc, is Mg-dependent; Cdc42p is GGTase I substrate
orf19.1804	orf19.1804	0.0035875	0.312963	0.00783819	0.1464	-0.00241657	0.648796	0.00177835	0.877536	Predicted ORF in Assemblies 19, 20 and 21
orf19.1805	PEX14	0.00134907	0.755281	0.0013069	0.800722	-0.00121645	0.828957	-9.82886e-05	0.982632	Protein not essential for viability; similar to S. cerevisiae Pex14p, which is a peroxisomal protein involved in import of peroxisomal matrix proteins
orf19.1806	orf19.1806	0.000548515	0.849352	0.000754877	0.801435	0.000702478	0.872483	-0.000917071	0.814908	Predicted ORF in Assemblies 19, 20 and 21; possibly spurious ORF (Annotation Working Group prediction)
orf19.1808	orf19.1808	0.00780442	0.20948	-0.00196883	0.916143	0.00895978	0.123803	0.00326333	0.383317	Putative protein of unknown function, transcription is positively regulated by Tbf1p; predicted ORF in Assemblies 19, 20 and 21
orf19.1814	orf19.1814	-0.00154391	0.682404	0.000573261	0.883756	-0.000577625	0.936293	-0.000463697	0.918681	Predicted ORF in Assemblies 19, 20 and 21
orf19.182	orf19.182	0.00733741	0.188985	0.00455457	0.309505	0.004683	0.296929	0.0045778	0.630167	Predicted ORF in Assemblies 19, 20 and 21
orf19.1822	UME6	0.00259728	0.254847	0.000733688	0.8082	-0.000950709	0.68696	0.00149465	0.483142	Transcription factor; required for wild-type hyphal extension, virulence; zinc cluster DNA-binding motif; similar to S. cerevisiae Ume6p, which is a meiotic regulator; alkaline upregulated; filament induced; regulated by Nrg1p, Tup1p, RFG1p
orf19.1823	orf19.1823	0.00693331	0.305747	0.00695048	0.33585	0.013534	0.0986619	0.0141881	0.0609968	Predicted ORF in Assemblies 19, 20 and 21; transcription is downregulated in response to treatment with ciclopirox olamine
orf19.1824	PGA50	0.00810454	0.314635	-0.0137963	0.387107	0.00319624	0.452523	0.000743677	0.933523	Putative GPI-anchored protein of unknown function
orf19.1826	MDM34	0.0121294	0.409928	0.000370656	0.979468	0.0127464	0.195908	0.0131268	0.0491175	Putative transcription factor with zinc finger DNA-binding motif; macrophage-downregulated gene
orf19.1827	orf19.1827	0.000976241	0.902573	0.00493041	0.588798	-0.000907738	0.841843	0.00059229	0.912634	Predicted ORF in Assemblies 19, 20 and 21; transcription is induced in response to alpha pheromone in SpiderM medium
orf19.1828	BUD16	-0.00320316	0.688715	0.00145847	0.92633	0.0126101	0.0423658	0.00379186	0.625815	Protein similar to S. cerevisiae Bud16p; induced in response to alpha pheromone in SpiderM medium
orf19.1830	orf19.1830	-0.00846169	0.218825	3.99201e-06	0.998686	0.00079238	0.883014	-0.00857094	0.490251	Predicted ORF in Assemblies 19, 20 and 21
orf19.1831	orf19.1831	0.0018721	0.572499	-0.00310873	0.554163	2.51767e-05	0.995836	0.002711	0.692148	Predicted ORF in Assemblies 19, 20 and 21
orf19.1832	FCY23	-0.00822038	0.292411	-0.0176894	0.150319	0.00462099	0.456862	0.00150927	0.861001	Putative transporter; Gcn4p-regulated; more similar to S. cerevisiae Tpn1p, which is a vitamin B6 transporter, than to purine-cytosine permeases
orf19.1834	orf19.1834	0.00258754	0.537083	-0.000275032	0.976837	-0.00205384	0.39736	0.000911213	0.909371	Predicted ORF in Assemblies 19, 20 and 21
orf19.184	orf19.184	0.00163761	0.471506	0.00127411	0.64722	-0.0010971	0.758158	0.00701955	0.387742	Predicted ORF in Assemblies 19, 20 and 21
orf19.1840	orf19.1840	0.000617854	0.818268	-0.0019189	0.740063	0.00195657	0.72892	0.00174622	0.873904	Predicted ORF in Assemblies 19, 20 and 21
orf19.1842	orf19.1842	0.0095585	0.0765535	-0.0222389	0.644833	-0.0130744	0.731488	-0.00728596	0.735241	Predicted ORF in Assemblies 19, 20 and 21
orf19.1844	orf19.1844	-0.00526407	0.34008	0.00584703	0.664992	0.000754473	0.932679	-0.00506038	0.511294	Predicted ORF in Assemblies 19, 20 and 21; similar to ferric reductase Fre10p
orf19.1847	ARO10	0.0129451	0.0582208	-0.0120145	0.47476	0.0105908	0.169782	0.0029064	0.73455	Aromatic decarboxylase of the Ehrlich fusel oil pathway of aromatic alcohol biosynthesis; pH-regulated (alkaline downregulated); protein abundance is affected by URA3 expression in the CAI-4 strain background
orf19.1849	orf19.1849	-0.00775194	0.271089	4.8478e-05	0.995997	-0.0130975	0.378077	-0.0184314	0.0622714	Predicted ORF in Assemblies 19, 20 and 21
orf19.1853	HHT2	0.0110349	0.0703301	-0.00602226	0.846102	-0.00180103	0.769605	-0.00323472	0.772881	Protein described as histone H3; farnesol regulated
orf19.1855	orf19.1855	0.000750344	0.934944	0.00943199	0.119349	0.00472763	0.253574	1.64447e-05	0.996623	Predicted membrane transporter, member of the anion:cation symporter (ACS) family, major facilitator superfamily (MFS); Gcn4p-regulated; flucytosine induced; ketoconazole-repressed; oxidative stress-induced via Cap1p
orf19.1856	orf19.1856	0.000206728	0.968297	-0.00421378	0.586862	-0.00136217	0.755743	-0.00342958	0.355833	Predicted ORF in Assemblies 19, 20 and 21
orf19.1857	orf19.1857	0.00215057	0.357621	0.00272569	0.374666	0.0024644	0.672593	0.00300603	0.289656	Protein not essential for viability
orf19.1860	LSC2	-0.00402241	0.263344	-0.00129962	0.537048	0.00108224	0.786155	-0.00193331	0.279662	Protein described as beta subunit of succinate-CoA ligase; transcription regulated by Mig1p and Tup1p; transcriptionally regulated by iron; expression greater in high iron; filament induced
orf19.1860.1	orf19.1860.1	0.00261881	0.284832	0.00155124	0.637811	-0.00149617	0.711817	0.00356793	0.275838	Predicted ORF in Assemblies 19, 20 and 21
orf19.1861	orf19.1861	0.00755365	0.314379	0.000550087	0.944606	0.00412821	0.493289	0.00233277	0.804897	Predicted ORF in Assemblies 19, 20 and 21
orf19.1862	orf19.1862	-0.00252595	0.550854	0.00233678	0.478813	0.00104454	0.560786	0.000508563	0.832969	Possible stress protein; increased transcription is associated with CDR1 and CDR2 overexpression or fluphenazine treatment; transcription regulated by Sfu1p, Nrg1p, Tup1p
orf19.1863	orf19.1863	0.0112191	0.0953292	0.00524098	0.648213	0.010241	0.10076	0.00427817	0.327512	Predicted ORF in Assemblies 19, 20 and 21
orf19.1865	orf19.1865	0.00222595	0.420994	0.00211661	0.639043	-0.00393262	0.561077	0.00331029	0.199159	Predicted ORF in Assemblies 19, 20 and 21
orf19.1866	orf19.1866	-0.0037797	0.545948	-0.000545737	0.958257	-0.00782625	0.315784	-0.0105192	0.286376	Predicted ORF in Assemblies 19, 20 and 21
orf19.1867	orf19.1867	0.00614936	0.374474	0.00267588	0.799679	0.00466101	0.401415	0.00952917	0.248667	Putative malate permease; induced during macrophage infection; regulated by Gcn2p and Gcn4p; has putative peroxisome targeting signal
orf19.1868	RNR22	0.0170488	0.0770956	0.0238136	0.0289335	0.0156934	0.122283	-0.00566733	0.535378	Protein described as ribonucleoside diphosphate reductase; shows colony morphology-related gene regulation by Ssn6p; RNA abundance regulated by tyrosol and cell density
orf19.1872	orf19.1872	-0.00615843	0.189983	-0.00753079	0.528294	4.54364e-06	0.999135	-0.0131211	0.275804	Predicted ORF in Assemblies 19, 20 and 21; repressed by nitric oxide
orf19.1873	orf19.1873	-0.00314889	0.346548	0.000142454	0.980863	-0.000637811	0.889335	-0.00152881	0.686396	Predicted ORF in Assemblies 19, 20 and 21; repressed by nitric oxide; possibly spurious ORF (Annotation Working Group prediction)
orf19.1877	orf19.1877	-0.00730095	0.0775985	0.00349905	0.599554	-0.00598262	0.186648	-0.00243379	0.82425	Predicted ORF in Assemblies 19, 20 and 21
orf19.1878	orf19.1878	0.009804	0.0802756	0.00731662	0.268976	-1.16834e-05	0.998538	0.00596998	0.112191	Predicted ORF in Assemblies 19, 20 and 21
orf19.1883	YCS4	0.00316829	0.694688	-0.00290493	0.676037	0.00428327	0.69789	0.0106661	0.0922286	Predicted ORF in Assemblies 19, 20 and 21; cell-cycle regulated periodic mRNA expression
orf19.1885	TAF4	0.00911422	0.303876	0.00786013	0.580906	-0.000526179	0.96624	0.000939013	0.956076	Predicted ORF in Assemblies 19, 20 and 21; mutation confers hypersensitivity to toxic ergosterol analog
orf19.1888	orf19.1888	-0.00457749	0.248011	-0.00166837	0.466703	-0.00572696	0.31757	-0.0017414	0.537632	Predicted ORF in Assemblies 19, 20 and 21
orf19.1891	2009-04-01	-0.00258166	0.347224	-0.00136601	0.763534	0.000443904	0.827451	-0.00556422	0.0745141	Vacuolar aspartic proteinase; mRNA abundance is equivalent in yeast-form and mycelial cells but is elevated at lower growth temperatures; upregulated in the presence of human neutrophils; detected by mass spec in stationary phase cultures
orf19.1893	orf19.1893	-0.0126973	0.0586891	0.000680898	0.965778	-0.0322391	0.0171303	-0.00923212	0.445698	Predicted ORF in Assemblies 19, 20 and 21
orf19.1896	SSC1	0.000207307	0.964046	-0.00473663	0.753596	-0.00078383	0.88513	-0.00641598	0.564797	Heat shock protein; at surface of yeast-form cells, but not hyphae; antigenic; soluble in hyphae; Gcn4p-regulated; induced upon amino acid starvation (3-aminotriazole) or upon adherence to polystyrene; macrophage-downregulated protein
orf19.1897	orf19.1897	0.000377346	0.922983	-0.00177562	0.716178	0.00195182	0.493572	-0.000329234	0.876035	Predicted ORF in Assemblies 19, 20 and 21
orf19.1906	orf19.1906	-0.00230571	0.506186	0.00731205	0.197515	0.00865516	0.114484	0.00668631	0.438114	Predicted ORF in Assemblies 19, 20 and 21
orf19.1907	EMC9	0.00251418	0.757083	-0.000213461	0.97848	0.00392094	0.156743	0.010054	0.094278	Protein not essential for viability, induced during the mating process
orf19.1910	orf19.1910	0.006077	0.210127	0.000213079	0.979468	0.00206818	0.734486	0.00583512	0.131306	Predicted ORF in Assemblies 19, 20 and 21
orf19.1911	PGA52	0.000207129	0.956228	0.00615708	0.195972	0.00645233	0.0935806	0.00940953	0.0747011	Putative GPI-anchored protein of unknown function; fluconazole-induced
orf19.1913	orf19.1913	0.00298831	0.358257	2.46741e-05	0.995405	5.68073e-05	0.988062	0.0028173	0.213852	Predicted ORF in Assemblies 19, 20 and 21
orf19.1925	TLO5	-0.00151561	0.792786	0.00519913	0.49748	0.000107475	0.980147	-0.00278959	0.450909	Member of a family of telomere-proximal genes of unknown function; may be spliced in vivo
orf19.1926	SEF2	0.00217073	0.460075	0.00512143	0.150319	-4.48272e-05	0.986828	0.0036964	0.163669	Putative zinc cluster protein; expression is repressed by Sfu1p under high-iron conditions
orf19.1932	CFL4	-0.00999951	0.153242	-0.0272032	0.633316	-0.0216979	0.637453	0.00537023	0.666264	Similar to ferric reductase, C-terminal region; expression greater in low iron; transcription is negatively regulated by Sfu1p; ciclopirox olamine induced; shows colony morphology-related gene regulation by Ssn6p
orf19.1934	orf19.1934	-0.0106374	0.0479158	-0.012856	0.0394595	-0.00726643	0.0930966	-0.00800646	0.0799099	Predicted ORF in Assemblies 19, 20 and 21; repressed upon high-level peroxide stress
orf19.1935	orf19.1935	-0.00457913	0.724897	-0.0259586	0.261116	-0.0231547	0.235852	-0.0448897	0.0225806	Predicted ORF in Assemblies 19, 20 and 21; possibly spurious ORF (Annotation Working Group prediction)
orf19.1936	SNF1	-0.00392432	0.421968	0.0162908	0.0558013	-0.00333733	0.585637	-0.0135731	0.346817	Essential protein; functional homolog of S. cerevisiae Snf1p regulator of sugar metabolism; constitutively expressed; Thr208 phosphorylation may have regulatory role; up-regulation associated with azole resistance; has polyhistidine tract
orf19.1938	orf19.1938	-0.0769554	0.0248195	-0.345624	0.00926589	-0.0770356	0.0387714	-0.186514	0.044563	Decreased transcription is observed in an azole-resistant strain that overexpresses CDR1 and CDR2; increased transcription is observed upon benomyl treatment
orf19.1939	orf19.1939	-0.0125414	0.159333	-0.0190857	0.123065	-0.0301592	0.166476	-0.00972892	0.278941	Predicted ORF in Assemblies 19, 20 and 21
orf19.1943	orf19.1943	0.00539098	0.194912	0.00265084	0.524455	0.00664204	0.169464	0.00415676	0.323589	Predicted ORF in Assemblies 19, 20 and 21
orf19.1948	orf19.1948	0.00852783	0.116461	0.00196309	0.81418	0.00793925	0.154503	0.0101853	0.0587208	Predicted ORF in Assemblies 19, 20 and 21
orf19.1952	orf19.1952	0.00402506	0.79949	-0.0230387	0.161622	0.00176205	0.861942	-0.0331752	0.305558	Protein not essential for viability; merged with orf19.1953 in Assembly 21
orf19.1953	orf19.1953	-0.0106214	0.0798766	0.0229771	0.156287	0.00511756	0.532957	0.00222969	0.876618	Predicted ORF in Assemblies 19, 20 and 21; not essential for viability; merged with orf19.1952 in Assembly 21
orf19.1954	PUS4	-0.0610243	0.0180493	-0.0574514	0.0157022	-0.0238228	0.119783	-0.0326652	0.0199295	Transcription is regulated by Nrg1p, Mig1p, and Tup1p
orf19.1955	orf19.1955	-0.00478218	0.564264	-0.00407503	0.752332	-0.00272214	0.535164	0.000386718	0.965502	Predicted ORF in Assemblies 19, 20 and 21
orf19.1960	CLN3	0.0155529	0.162482	0.00340171	0.879021	0.0107857	0.308483	0.0101622	0.683533	G1 cyclin; depletion causes abolished budding and hyphal growth defects; likely to be essential; farnesol regulated, upregulated in biofilm; functional in S. cerevisiae; similar to S. cerevisiae Cln3p, which is a G1-specific cyclin
orf19.1961	orf19.1961	0.00493153	0.159215	0.00697369	0.19316	0.00992838	0.0411914	0.00231806	0.413803	Predicted ORF in Assemblies 19, 20 and 21
orf19.1963	orf19.1963	-0.0046339	0.186442	0.0025271	0.498105	-0.00136199	0.747142	-0.0023996	0.416193	Predicted ORF in Assemblies 19, 20 and 21
orf19.1964	orf19.1964	0.00230383	0.792009	-0.000374048	0.958257	-0.00205932	0.720603	-0.00170638	0.872035	Putative protein of unknown function; downregulated upon fluphenazine treatment; upregulated upon benomyl treatment and in an RHE model; regulated by Nrg1p, Tup1p
orf19.1967	orf19.1967	0.0011006	0.59755	-0.000675789	0.711368	-9.76162e-05	0.956439	-0.00148406	0.554347	Predicted ORF in Assemblies 19, 20 and 21
orf19.1968.1	orf19.1968.1	0.00345217	0.230402	0.00211525	0.566094	0.0062367	0.0605519	0.00603656	0.0363945	ORF Predicted by Annotation Working Group
orf19.1969	CCW14	0.00320795	0.740918	-0.00720866	0.355327	0.0149993	0.0856263	0.0030526	0.731801	Putative mannoprotein of cell wall with role in response to stress; increased mRNA abundance observed in cyr1 homozygous mutant (hyphal or yeast-form cells) and in ras1 homozygous mutant (yeast-form cells)
orf19.1970	orf19.1970	0.00466212	0.240065	0.00108846	0.832288	0.000337286	0.911584	0.00364723	0.295689	Predicted ORF in Assemblies 19, 20 and 21
orf19.1971	orf19.1971	-0.0110156	0.336147	-0.0130068	0.37528	-0.00784776	0.517328	-0.0184523	0.289817	Predicted ORF in Assemblies 19, 20 and 21
orf19.1972	orf19.1972	0.000356788	0.969868	0.000743999	0.967091	0.00791034	0.306888	0.00782368	0.300784	Predicted ORF in Assemblies 19, 20 and 21
orf19.1973	HAP5	0.00269029	0.226258	0.00105072	0.757061	-0.00406148	0.197696	0.00116589	0.787588	Component of CCAAT-binding transcription factor; roles in filamentous growth, low-iron (chelation) induction of FRP1 transcription; regulates genes with roles in respiratory growth; functional homolog of S. cerevisiae Hap5p
orf19.1974	TFS1	0.00239026	0.479146	0.00118279	0.612037	0.00354071	0.340264	0.000429105	0.780142	Transcription is regulated upon yeast-hyphal switch; shows colony morphology-related gene regulation by Ssn6p
orf19.1975	orf19.1975	0.00146465	0.706344	0.000735016	0.932771	-0.00207694	0.716453	-0.000116707	0.975692	Predicted ORF in Assemblies 19, 20 and 21
orf19.1976	TRX2	0.0010501	0.899124	0.00452592	0.356998	0.00273399	0.446724	-0.00153502	0.875057	Predicted ORF in Assemblies 19, 20 and 21
orf19.1977	URA4	0.0084029	0.397722	0.0108357	0.0769597	0.00990849	0.0368886	-0.00589007	0.439937	Predicted ORF in Assemblies 19, 20 and 21; protein detected by mass spec in exponential and stationary phase cultures
orf19.1979	GIT1	-0.00254478	0.505656	0.000262715	0.940974	0.00116686	0.67156	-0.00245618	0.202838	Putative glycerophosphoinositol permease; fungal-specific (no human or murine homolog); alkaline downregulated; transcription is specific to white cell type; caspofungin repressed; macrophage/pseudohyphal-repressed
orf19.198	ASN1	0.0071398	0.210998	0.0088899	0.211961	0.00438731	0.279742	0.00215144	0.658733	Protein described as asparagine synthetase; soluble protein in hyphae; regulated by Rim101p; decreased expression at pH 4 compared to pH 8
orf19.1980	GIT4	0.00164015	0.716588	0.00631796	0.333576	0.00409073	0.13555	0.00739645	0.423016	Putative glycerophosphoinositol permease; fungal-specific (no human or murine homolog)
orf19.1985	orf19.1985	0.00525684	0.345359	0.00815056	0.173086	0.00550582	0.253321	0.00937601	0.0849007	Predicted ORF in Assemblies 19, 20 and 21
orf19.1988	CDC45	-0.00069341	0.929673	0.0103501	0.221149	0.000520675	0.911183	0.00839647	0.218144	Protein described as a DNA replication initiation factor; transcriptionally regulated by interaction with macrophage
orf19.199	orf19.199	-0.00208425	0.877588	0.0100889	0.035142	-0.00544561	0.563476	0.00420314	0.469047	Predicted ORF in Assemblies 19, 20 and 21; hyphal-induced expression; greater mRNA abundance observed in a cyr1 homozygous null mutant than in wild type
orf19.1990	SNX4	-0.019126	0.417422	-0.0221503	0.125423	0.00304885	0.808713	0.00352987	0.758651	Protein induced during the mating process
orf19.1991	orf19.1991	0.0057261	0.319374	-0.00330824	0.48537	0.00733785	0.245246	0.00766574	0.0918648	Predicted ORF in Assemblies 19, 20 and 21
orf19.1994	orf19.1994	-0.00323597	0.843183	-0.0263076	0.49504	0.00945414	0.477584	-0.00312997	0.828852	Predicted ORF in Assemblies 19, 20 and 21
orf19.1995	orf19.1995	-0.00422569	0.404428	0.00318876	0.689598	0.00286204	0.531923	0.00622538	0.29551	Predicted ORF in Assemblies 19, 20 and 21
orf19.1998	orf19.1998	0.00369644	0.594833	0.00705676	0.156689	0.00501064	0.163559	0.0040075	0.487474	Predicted ORF in Assemblies 19, 20 and 21
orf19.1999	orf19.1999	-0.000301479	0.963148	0.00254933	0.745742	0.00111899	0.914326	0.00451814	0.590608	Predicted ORF in Assemblies 19, 20 and 21
orf19.20	RTS1	0.0133168	0.791965	0.0414763	0.346931	0.0300548	0.42332	0.0511783	0.125107	Transcription is regulated upon yeast-hyphal switch
orf19.2000	orf19.2000	0.00810758	0.0389773	0.00969971	0.0898554	-0.0049048	0.347363	-0.00147931	0.811515	Predicted ORF in Assemblies 19, 20 and 21
orf19.2003	HNM1	0.00224362	0.829352	0.00158644	0.855637	0.00632962	0.397599	0.010631	0.188732	Predicted ORF in Assemblies 19, 20 and 21; mutation confers hypersensitivity to toxic ergosterol analog; shows colony morphology-related gene regulation by Ssn6p; clade-associated gene expression
orf19.2005	REG1	0.00540281	0.188985	-0.00292127	0.656219	-0.00278064	0.564181	0.00120313	0.807549	Predicted ORF in Assemblies 19, 20 and 21; macrophage/pseudohyphal-induced; possibly transcriptionally regulated upon hyphal formation
orf19.2006	orf19.2006	0.00645483	0.240319	0.0127836	0.277264	0.0193458	0.00499718	0.00494368	0.634897	Predicted ORF in Assemblies 19, 20 and 21
orf19.2006.1	COX17	0.0180809	0.167312	-0.00304041	0.855637	-0.00763642	0.520825	0.0059493	0.798181	ORF predicted by Annotation Working Group; transcription is upregulated in both intermediate and mature biofilms
orf19.2008	orf19.2008	0.00842745	0.156803	0.00252231	0.776955	0.00617259	0.308213	0.00394366	0.561017	Predicted ORF in Assemblies 19, 20 and 21
orf19.2009	orf19.2009	-0.0043437	0.698653	0.00712596	0.606785	0.00410363	0.728867	0.00207207	0.787588	Predicted ORF in Assemblies 19, 20 and 21
orf19.2010	orf19.2010	0.00340065	0.298978	0.00262595	0.173852	0.00287393	0.390982	0.00105637	0.767491	Predicted ORF in Assemblies 19, 20 and 21
orf19.2012	NOT3	0.00563133	0.202619	-0.0106996	0.23202	0.0021728	0.771218	0.00740742	0.452737	Protein with similarity to Not5p, putative transcriptional regulator; not required for adherence to buccal epithelial cells or for virulence in mouse systemic infection; null mutant colonies exhibit slightly decreased filamentation ratio
orf19.2013	KAR2	-0.00772909	0.54657	-0.00570102	0.855637	0.0079193	0.382787	-0.00672961	0.840501	Similar to chaperones of Hsp70p family; transcriptionally regulated by iron; expression greater in high iron; protein detected by mass spec in exponential and stationary phase cultures
orf19.2014	BCY1	-0.00918215	0.510643	-0.00377303	0.943903	0.0100737	0.390982	-0.0151065	0.549676	Regulatory subunit of protein kinase A; required for nuclear localization of Tpk1p; physically interacts with Tpk1p; essential for viability; apoptosis-regulated; bcy1 heterozygous or bcy1 tpk2 mutant has filamentous growth defect
orf19.2016	orf19.2016	-0.00119863	0.837537	0.00189733	0.926552	-0.0128769	0.465092	0.0174297	0.160821	Predicted ORF in Assemblies 19, 20 and 21
orf19.2017	orf19.2017	0.0185234	0.130088	0.0107048	0.723999	0.00469555	0.370681	0.00428675	0.487402	Predicted ORF in Assemblies 19, 20 and 21
orf19.2018	orf19.2018	0.00540632	0.226685	-0.00665036	0.097029	0.00483527	0.356708	0.00932271	0.194067	Predicted ORF in Assemblies 19, 20 and 21
orf19.2018.1	orf19.2018.1	0.00107936	0.900117	-0.00136016	0.8827	-0.000789706	0.929631	0.00172786	0.83953	Predicted ORF in Assembly 20 and 21; gene has intron; similar to human BLOC1S2
orf19.2023	HGT7	0.0028046	0.381416	0.00187742	0.536222	-0.00321085	0.372585	0.0053801	0.0928035	Putative glucose transporter, major facilitator superfamily; glucose-, fluconazole-, Snf3p-induced, expressed at high glucose; upregulated in biofilm; C. albicans glucose transporter family comprises 20 members; 12 TM regions predicted
orf19.2024	orf19.2024	0.00410605	0.452795	0.00606656	0.295309	0.00456023	0.227182	0.00526047	0.478579	Predicted ORF in Assemblies 19, 20 and 21; possibly spurious ORF (Annotation Working Group prediction)
orf19.2025	orf19.2025	0.0103898	0.122998	-0.00652424	0.832288	0.00738237	0.0875667	0.00326889	0.595081	Predicted ORF in Assemblies 19, 20 and 21
orf19.2026	orf19.2026	-0.00174579	0.563096	-0.00405341	0.75166	0.000666471	0.899684	2.08094e-05	0.997695	Predicted ORF in Assemblies 19, 20 and 21
orf19.2028	MXR1	-0.074707	0.366718	-0.0332768	0.716452	-0.0415304	0.551358	0.00314247	0.901978	Protein described as a methionine sulfoxide reductase; flucytosine induced; Plc1p-regulated; upregulated in the presence of human neutrophils; macrophage regulated (gene induced, protein decreased); possibly adherence-induced
orf19.2030	orf19.2030	-0.00588158	0.355672	-0.00412487	0.637731	-0.00902542	0.182615	-0.0109078	0.507477	Predicted ORF in Assemblies 19, 20 and 21; greater mRNA abundance observed in a cyr1 or ras1 homozygous null mutant than in wild type
orf19.2031	VPS24	-0.00491782	0.512578	-0.00606521	0.503587	0.0145715	0.37487	-0.0218129	0.0377557	Protein similar to S. cerevisiae Vps24p, which is a member of the ESCRT III protein sorting complex; downregulated upon adherence to polystyrene
orf19.2033	PGA19	0.000678419	0.920846	-0.0151124	0.390963	-0.0082234	0.370681	-0.000530047	0.981398	Putative GPI-anchored protein; not essential for viability; macrophage-induced gene
orf19.2034	orf19.2034	-5.91119e-05	0.984076	-0.00031341	0.941746	0.000403545	0.937557	0.00475163	0.534623	Predicted ORF in Assemblies 19, 20 and 21
orf19.2035	orf19.2035	0.00614888	0.556426	0.0130626	0.503976	0.0108404	0.271634	0.00370719	0.833856	Predicted ORF in Assemblies 19, 20 and 21
orf19.2036	orf19.2036	0.00621754	0.330426	0.00297539	0.841999	0.00308621	0.706933	0.0120066	0.0920479	Predicted ORF in Assemblies 19, 20 and 21
orf19.2037	orf19.2037	0.00246478	0.691657	-0.00252422	0.795085	0.00945125	0.437992	0.0219693	0.0188256	Predicted ORF in Assemblies 19, 20 and 21
orf19.2038	orf19.2038	-0.115237	0.0279252	-0.294497	0.0544364	-0.175407	0.0579862	-0.221673	0.0126064	Predicted ORF in Assemblies 19, 20 and 21
orf19.2039	MSF1	0.00432428	0.225983	0.00513718	0.37083	0.00139435	0.824129	0.00585247	0.382464	Predicted ORF in Assemblies 19, 20 and 21; protein level decreased in stationary phase cultures
orf19.2040	orf19.2040	-0.00512766	0.498624	-0.0195981	0.247444	0.01055	0.136972	-0.00488428	0.724761	Predicted ORF in Assemblies 19, 20 and 21
orf19.2042	orf19.2042	0.0107455	0.0613972	0.00712217	0.523276	0.00729317	0.100828	-0.00211415	0.807181	Predicted ORF in Assemblies 19, 20 and 21
orf19.2043	orf19.2043	0.00232919	0.55223	-0.00435381	0.519132	0.000106361	0.984374	0.00113463	0.67344	Predicted ORF in Assemblies 19, 20 and 21
orf19.2044	PGA27	-0.000600839	0.947459	-0.0218144	0.38113	0.00236932	0.760438	-0.00141543	0.901468	Putative GPI-anchored protein of unknown function
orf19.2046	POT1-2	0.00207877	0.545723	0.00291412	0.323991	0.00333486	0.317069	0.00261636	0.376717	Putative peroxisomal 3-ketoacyl CoA thiolase
orf19.2047	orf19.2047	-0.00776241	0.409118	-0.0130312	0.435187	-0.00589117	0.38183	-0.0196391	0.383317	Predicted ORF in Assemblies 19, 20 and 21; mutation confers hypersensitivity to toxic ergosterol analog, and to amphotericin B
orf19.2048	orf19.2048	0.00621304	0.1486	-0.0129207	0.0544364	0.00408073	0.549856	0.00908437	0.12316	Transcription is positively regulated by Sfu1p
orf19.2049	orf19.2049	-0.00125759	0.710578	-0.00282067	0.575339	0.00136114	0.851876	-0.00226077	0.676126	Predicted ORF in Assemblies 19, 20 and 21; heterozygous null mutant displays sensitivity to virgineone
orf19.2051	orf19.2051	0.000850216	0.730886	0.00128682	0.772612	-0.00215077	0.802401	0.000714582	0.806295	Predicted ORF in Assemblies 19, 20 and 21
orf19.2054	FGR15	-0.00126806	0.947459	-0.0129558	0.37207	0.00885927	0.169464	-0.0155946	0.616299	Putative transcription factor with zinc finger DNA-binding motif; lacks an ortholog in S. cerevisiae; transposon mutation affects filamentous growth; caspofungin induced; mutation causes marginal increase in caspofungin sensitivity
orf19.2055	NPL6	0.00188371	0.89726	0.000323537	0.972107	0.00521698	0.342083	0.00260377	0.29174	Putative nuclear protein localization factor; fungal-specific (no human or murine homolog)
orf19.2057	orf19.2057	0.00728054	0.11947	0.00444063	0.517191	-0.00136569	0.819713	0.00183525	0.768709	Predicted ORF in Assemblies 19, 20 and 21
orf19.2059	orf19.2059	0.0037394	0.498624	0.0142157	0.221149	0.00772194	0.0727939	0.000174811	0.983748	Predicted ORF in Assemblies 19, 20 and 21
orf19.206	orf19.206	-2.72308e-05	0.997181	0.0134027	0.0326256	0.00238765	0.75098	0.00804029	0.211081	Predicted ORF in Assemblies 19, 20 and 21
orf19.2062	SOD4	0.00310641	0.730886	0.0025601	0.766471	0.00939383	0.205959	0.00660467	0.244572	Copper- and zinc-containing superoxide dismutase; role in response to host innate immune ROS; regulated on white-opaque switching; ciclopirox olamine induced; caspofungin repressed; member of family that includes SOD1, SOD4, SOD5, and SOD6
orf19.2065	orf19.2065	0.0107731	0.045957	0.00951707	0.0811553	0.00536832	0.273806	0.00959977	0.0367644	Predicted ORF in Assemblies 19, 20 and 21
orf19.2068	orf19.2068	-0.00423229	0.540233	-0.015044	0.192611	-0.0255905	0.25077	0.000160198	0.975692	Predicted ORF in Assemblies 19, 20 and 21
orf19.207	PGA55	0.00442414	0.391334	0.00889974	0.517191	0.00745738	0.106019	0.0109475	0.0122437	Putative GPI-anchored protein of unknown function; filament induced; regulated by Nrg1p, Tup1p; possibly transcriptionally regulated upon hyphal formation
orf19.2073	orf19.2073	0.0018452	0.730965	0.0117341	0.151273	-0.000670423	0.970699	-0.0114112	0.375259	Predicted ORF in Assemblies 19, 20 and 21; transcriptionally activated by Mnl1p under weak acid stress
orf19.2074	orf19.2074	-0.00255371	0.688715	-0.00395433	0.784671	0.00479544	0.335477	-0.00724616	0.144165	Predicted ORF in Assemblies 19, 20 and 21
orf19.2075	DFG5	0.00428615	0.489007	-0.0201031	0.480436	-0.00417332	0.609138	-0.0138645	0.318788	N-linked mannoprotein of cell wall and membrane; possible signal transducer; role in hyphal growth and HWP1 induction in alkaline pH; GPI modification predicted; dfg5 dcw1 double mutant is inviable; caspofungin-induced, fungal-specific
orf19.2076	orf19.2076	0.000700294	0.825321	-0.0010505	0.880734	-0.00482279	0.562082	0.000244767	0.950705	Predicted ORF in Assemblies 19, 20 and 21
orf19.2077	ZCF9	-0.0521972	0.00231551	-0.103475	0.0699949	-0.0853246	0.026154	-0.0960793	0.00498817	Putative transcription factor with zinc cluster DNA-binding motif; hypersensitive to toxic ergosterol analog ECC69 and/or ECC1384
orf19.2078	orf19.2078	-0.100648	0.00570842	-0.126843	0.00123255	-0.0746043	0.0171303	-0.0966402	0.0497274	Predicted ORF in Assemblies 19, 20 and 21
orf19.2081	orf19.2081	0.00108003	0.898637	0.00507343	0.528294	0.00356606	0.331534	0.00701769	0.0540356	Predicted ORF in Assemblies 19, 20 and 21
orf19.2082	SAP30	0.017662	0.207789	-0.0186446	0.685608	-0.0345615	0.0123802	-0.0191065	0.094278	Aspartic-type endopeptidase involved in degradation of alpha pheromone; functional equivalent of S. cerevisiae Bar1p; specific to a-cells; transcription is induced in response to alpha pheromone
orf19.2084	CDH1	-0.0129479	0.378225	0.00821161	0.163548	0.00600461	0.341416	0.0126901	0.0917597	Predicted ORF in Assemblies 19, 20 and 21; transcriptionally activated by Mnl1p under weak acid stress
orf19.2087	SAS2	-0.00172924	0.884	0.0122056	0.527941	0.0116955	0.0305527	-0.00159169	0.865433	Predicted ORF in Assemblies 19, 20 and 21
orf19.2088	orf19.2088	0.000624032	0.864053	-0.00133935	0.776955	0.00277017	0.484022	-0.00643787	0.110461	Predicted ORF in Assemblies 19, 20 and 21
orf19.2089	orf19.2089	-0.00948924	0.0285233	-0.00550094	0.521014	-0.0181868	0.141244	-0.00454615	0.493172	Predicted ORF in Assemblies 19, 20 and 21
orf19.2090	orf19.2090	-0.016574	0.135553	0.00199981	0.860874	0.00537245	0.424748	-0.00480504	0.502966	Predicted ORF in Assemblies 19, 20 and 21
orf19.2093	RFA1	-0.0159772	0.0917682	-0.0343538	0.142995	-0.00452599	0.770482	-0.0367186	0.00889148	Protein described as DNA replication factor A; RNA abundance regulated by cell cycle, tyrosol and cell density
orf19.2094	PDR6	-0.0159601	0.144991	0.00521324	0.677988	-0.0127809	0.317069	-0.00791279	0.25613	Transcription is regulated by Nrg1p; transcription is induced in response to alpha pheromone in SpiderM medium
orf19.21	orf19.21	0.013541	0.0355393	0.0195973	0.0100583	0.00660275	0.449967	0.0109081	0.200517	Predicted ORF in Assemblies 19, 20 and 21
orf19.210	orf19.210	-0.0203608	0.011084	-0.00786343	0.160398	-0.00498564	0.217408	-0.0151165	0.0291952	Predicted ORF in Assemblies 19, 20 and 21
orf19.2101	orf19.2101	0.00414561	0.308276	0.00261595	0.600575	0.00602463	0.227147	0.00547112	0.254454	Predicted ORF in Assemblies 19, 20 and 21
orf19.2105	orf19.2105	-0.00123393	0.959248	-0.0099715	0.623916	-0.00830044	0.378569	-0.00700525	0.758862	Predicted ORF in Assemblies 19, 20 and 21
orf19.2106	orf19.2106	0.00552861	0.501934	-0.00411952	0.751032	0.00538664	0.51158	0.0059128	0.398039	Predicted ORF in Assemblies 19, 20 and 21
orf19.2107	MUQ1	-0.00411095	0.184443	-0.00188441	0.716535	0.000606528	0.885894	-0.00308216	0.299384	Protein described as choline phosphate cytidylyltransferase/phosphoethanolamine cytidylyltransferase; decreased expression in hyphae compared to yeast-form cells
orf19.211	orf19.211	-0.00345839	0.512578	0.00227606	0.593094	-0.00283833	0.67156	-0.00853612	0.225276	Predicted ORF in Assemblies 19, 20 and 21
orf19.2111.2	RPL38	-0.000303403	0.929959	-0.0010682	0.666684	0.000243155	0.943527	-0.000489901	0.834595	Predicted ribosomal protein; genes encoding cytoplasmic ribosomal subunits, translation factors, and tRNA synthetases are downregulated upon phagocytosis by murine macrophage
orf19.2113	orf19.2113	0.00727663	0.185711	-0.00490543	0.795085	0.00394341	0.414224	0.0108693	0.237084	Predicted ORF in Assemblies 19, 20 and 21
orf19.2117	LEU5	0.00335601	0.0771228	-0.000698047	0.926824	-4.52461e-05	0.989409	0.00732253	0.453178	Predicted ORF in Assemblies 19, 20 and 21; transcription is upregulated in both intermediate and mature biofilms
orf19.2119	NDT80	0.00909119	0.0703301	0.00628863	0.656268	0.00263406	0.63503	0.00760068	0.181893	Activator of CDR1 induction by antifungal drugs; required for wild-type drug resistance; transcriptionally induced upon antifungal drug treatment; similar to S. cerevisiae Ndt80p, which is a meiosis-specific transcriptional regulator
orf19.212	VPS28	-0.00525042	0.473854	0.00974749	0.361486	0.0124035	0.0732236	0.00490239	0.516898	Protein involved in proteolytic activation of Rim101p, which regulates pH response; role in echinocandin, azole sensitivity; similar to S. cerevisiae Vps28p, which is a subunit of the ESCRT I protein sorting complex
orf19.2124	orf19.2124	-0.00706981	0.212993	-0.000244385	0.973164	-0.00128018	0.81381	0.00369975	0.399544	Predicted ORF in Assemblies 19, 20 and 21
orf19.2127	orf19.2127	0.00190555	0.81946	0.00314182	0.679602	0.00774031	0.0666128	-0.00295368	0.505645	Predicted ORF in Assemblies 19, 20 and 21; transcription is induced in response to alpha pheromone in SpiderM medium
orf19.2128	orf19.2128	-0.000661703	0.932417	-0.000412904	0.979468	8.56376e-05	0.992947	0.00203362	0.864188	Predicted ORF in Assemblies 19, 20 and 21
orf19.2131	orf19.2131	0.0124985	0.101359	0.00514313	0.643604	0.00944807	0.106048	0.0152279	0.0305478	Predicted ORF in Assemblies 19, 20 and 21
orf19.2132	orf19.2132	-0.00557574	0.659592	0.00770645	0.675353	-0.0212022	0.253574	-0.0155466	0.202868	Predicted ORF in Assemblies 19, 20 and 21; possibly spurious ORF (Annotation Working Group prediction)
orf19.2135	TSM1	-0.000727804	0.947142	-0.00248455	0.830722	0.00425088	0.608925	0.00672355	0.455383	Putative protein of unknown function, transcription is upregulated in clinical isolates from HIV+ patients with oral candidiasis; transcription is regulated by Nrg1p; predicted ORF in Assemblies 19, 20 and 21
orf19.2138	ILS1	-0.00712877	0.362563	0.00583591	0.72488	-0.0106108	0.193044	-0.00870734	0.700899	Protein similar to isoleucyl-tRNA synthetase, the target of drugs including the cyclic beta-amino acid icofungipen/PLD-118/BAY-10-8888 and mupirocin; detected by mass spec in exponential and stationary phase cultures
orf19.2143	orf19.2143	0.00162096	0.742816	-0.000789282	0.946711	-0.00314843	0.627546	0.0142086	0.0166463	Predicted ORF in Assemblies 19, 20 and 21
orf19.2146	orf19.2146	0.00217462	0.396163	0.00202361	0.761468	0.00465499	0.294712	0.00524633	0.311635	Predicted ORF in Assemblies 19, 20 and 21
orf19.2149	orf19.2149	0.00377469	0.243121	0.00482497	0.177242	-0.0210874	0.370229	0.00522668	0.0605094	Predicted ORF in Assemblies 19, 20 and 21
orf19.215	orf19.215	-0.0133015	0.39045	0.00423084	0.783843	-0.000973793	0.844985	0.00613035	0.772881	Predicted ORF in Assemblies 19, 20 and 21
orf19.2151	NAG6	0.0120505	0.150287	0.0110851	0.646133	0.000559268	0.90607	-0.000541024	0.976006	Protein required for wild-type mouse virulence and wild-type cycloheximide resistance; putative GTP-binding motif; similar to S. cerevisiae Yor165Wp; in gene cluster that encodes enzymes of GlcNAc catabolism; no human or murine homolog
orf19.2158	NAG3	-0.035602	0.361429	-0.0774107	0.0379046	-0.0727267	0.0726592	-0.0893853	0.0784367	Putative transporter of the major facilitator superfamily (MFS); similar to Nag4p; required for wild-type mouse virulence and cycloheximide resistance; in gene cluster that includes genes encoding enzymes of GlcNAc catabolism
orf19.2160	NAG4	0.00130827	0.770765	0.0128545	0.0541861	-0.00192456	0.806529	0.00478335	0.535378	Putative transporter; fungal-specific; similar to Nag3p and to S. cerevisiae Ypr156Cp and Ygr138Cp; required for wild-type mouse virulence and wild-type cycloheximide resistance; gene cluster encodes enzymes of GlcNAc catabolism
orf19.2163	orf19.2163	0.00340369	0.481496	0.0041689	0.508352	0.00299028	0.549657	0.00516378	0.307311	Predicted ORF in Assemblies 19, 20 and 21
orf19.2166	orf19.2166	-0.00262196	0.722296	0.000498796	0.973164	-0.000790058	0.917035	-0.0107282	0.608097	Predicted ORF in Assemblies 19, 20 and 21
orf19.2167	orf19.2167	-0.278065	0.0663754	-0.244636	0.162733	-0.280106	0.0850155	-0.228339	0.163052	Predicted ORF in Assemblies 19, 20 and 21
orf19.2168	orf19.2168	-0.000492461	0.929673	0.00396259	0.761425	0.000438954	0.941925	-0.00283792	0.582598	Predicted ORF in Assemblies 19, 20 and 21
orf19.2168.3	orf19.2168.3	0.00513815	0.0285233	0.00485932	0.218112	0.00159716	0.53912	0.0105672	0.155328	ORF Predicted by Annotation Working Group
orf19.2169	orf19.2169	0.00469123	0.534663	0.00375005	0.599126	0.0082364	0.160453	-0.00432908	0.582598	Predicted ORF in Assemblies 19, 20 and 21
orf19.2173	MAF1	0.00730255	0.1486	0.00626617	0.0427846	0.00519603	0.251811	0.00324841	0.567564	Protein described as affecting nucleocytoplasmic transport and synthesis of RNA Polymerase III; decreased expression in hyphae compared to yeast-form cells; caspofungin repressed
orf19.2176	IFM3	0.00151278	0.92202	0.0129274	0.311976	-0.046303	0.0167501	-0.0172752	0.538217	Predicted ORF in Assemblies 19, 20 and 21; Plc1p-regulated
orf19.2178	orf19.2178	0.00320299	0.265715	0.0021746	0.514836	0.0043282	0.333163	0.00714148	0.114458	Predicted ORF in Assemblies 19, 20 and 21
orf19.2179	SIT1	0.00731212	0.108252	0.00127486	0.828033	0.00208833	0.592048	0.00730131	0.127364	Transporter of ferrichrome siderophores, but not ferrioxamine B; required for wild-type invasion of human epithelial cells in vitro, but not for wild-type systemic virulence in mouse; transcription regulated by iron, Sfu1p, Rfg1p, Tup1p
orf19.2179.2	RPS10	-0.145571	0.0147314	-0.180694	0.00926589	-0.162932	0.0090548	-0.135555	0.0194549	Predicted ribosomal protein; downregulated in the presence of human whole blood or polymorphonuclear (PMN) cells
orf19.218	BUD20	-0.000725931	0.944528	-0.00720013	0.781237	0.00240274	0.761855	-0.00782493	0.282347	Protein similar to S. cerevisiae Bud20p, which affects bud site selection; transposon mutation affects filamentous growth
orf19.2180	orf19.2180	-0.00113437	0.951994	-0.00377513	0.776406	0.00259548	0.674112	-0.00574187	0.094278	Predicted ORF in Assemblies 19, 20 and 21
orf19.2182	BLM3	0.0141811	0.177729	-0.00137656	0.974389	0.0114964	0.13217	-0.0137604	0.569808	Predicted ORF in Assemblies 19, 20 and 21; similar to S. cerevisiae Blm10p; transcription is regulated by Nrg1p and Mig1p
orf19.2183	KRE30	0.0245111	0.0703301	0.00690885	0.815697	-0.00682369	0.863112	0.0226432	0.381357	YEF3-subfamily ABC family protein, predicted not to be a transporter; downregulated during core stress response; mutation confers hypersensitivity to amphotericin B
orf19.2184	orf19.2184	0.00486218	0.553752	0.00182152	0.94786	-0.000326893	0.972684	-0.0019377	0.815301	Predicted ORF in Assemblies 19, 20 and 21; clade-associated gene expression
orf19.2187	ALG7	0.0015167	0.740458	0.0109635	0.137694	0.00705287	0.026199	0.00475796	0.435504	Protein involved in cell wall mannan biosynthesis; mutation confers hypersensitivity to tunicamycin; transcription is elevated in chk1, nik1, and sln1 homozygous null mutants
orf19.2191	orf19.2191	0.00561504	0.149098	0.00318196	0.404602	0.0034473	0.35136	0.00370958	0.182246	Predicted ORF in Assemblies 19, 20 and 21
orf19.2192	GDH2	-0.00412375	0.667065	0.00173932	0.880734	-0.00793012	0.29311	-0.00404495	0.746594	Putative NAD-specific glutamate dehydrogenase; fungal-specific (no human or murine homolog); transcription is regulated by Nrg1p, Mig1p, Tup1p, and Gcn4p
orf19.2193	PRS5	0.00552509	0.415446	0.00311518	0.871872	0.0147572	0.115968	0.016696	0.146966	Predicted ORF in Assemblies 19, 20 and 21; downregulated during core stress response
orf19.2194	orf19.2194	0.00423398	0.623208	-0.0193101	0.114827	0.00407483	0.692472	0.0101634	0.18576	Phosphorylated protein of unknown function; predicted ORF in Assemblies 19, 20 and 21
orf19.2196	orf19.2196	0.00688023	0.135475	-0.00216777	0.805263	0.00413843	0.328349	-0.0141734	0.0641284	Predicted ORF in Assemblies 19, 20 and 21
orf19.2197	orf19.2197	0.00291218	0.916743	0.00754872	0.317981	0.0162687	0.0547395	0.02088	0.0784367	Predicted ORF in Assemblies 19, 20 and 21
orf19.2198	FLC3	0.00187116	0.585453	0.00195737	0.436532	-0.00156801	0.115237	0.000620204	0.862423	Protein involved in heme uptake; putative FAD transporter, similar to S. cerevisiae Flc3p
orf19.2199	PHO86	0.00783712	0.290214	0.00628409	0.538877	0.0152906	0.0117774	0.0078293	0.33607	Predicted ORF in Assemblies 19, 20 and 21; possibly adherence-induced
orf19.220	PIR1	-0.00652121	0.2862	0.000497299	0.974389	-0.00210449	0.58678	0.00436846	0.537342	Structural protein of cell wall; 1,3-beta-glucan-linked; O-glycosylated by Pmt1p; N-mannosylated; tandem repeats; heterozygous mutant has cell wall defects; hyphal repressed; Hog1p, fluconazole, hypoxia induced; iron, Efg1p, Plc1p regulated
orf19.2202	orf19.2202	-0.0076877	0.578825	-0.00531343	0.751776	-0.0121202	0.174703	-0.00369968	0.876733	Predicted ORF in Assemblies 19, 20 and 21; transcription is induced in response to alpha pheromone in SpiderM medium
orf19.2203	orf19.2203	-0.00692222	0.612682	0.0088595	0.633316	-0.00308301	0.53679	0.00996934	0.132675	Predicted ORF in Assemblies 19, 20 and 21
orf19.2204	orf19.2204	0.00861854	0.187483	0.00137951	0.911776	0.0219871	0.071552	0.00512478	0.700899	Predicted ORF in Assemblies 19, 20 and 21
orf19.2204.2	orf19.2204.2	-0.000406919	0.956228	0.00761406	0.0759976	0.000606026	0.911285	0.0126297	0.0784367	ORF Predicted by Annotation Working Group (see Locus History Note for Assembly 19 correction)
orf19.2208	orf19.2208	0.00314032	0.330248	0.00676734	0.528294	-0.000226265	0.950455	0.000391306	0.960357	Predicted ORF in Assemblies 19, 20 and 21
orf19.2210	orf19.2210	-0.0146917	0.0775985	-0.0105036	0.38113	-0.0127587	0.397543	-0.0172689	0.307311	Predicted ORF in Assemblies 19, 20 and 21
orf19.2211	orf19.2211	-0.00466787	0.438382	0.0056005	0.435187	0.000269723	0.958262	-0.00681638	0.228108	Predicted ORF in Assemblies 19, 20 and 21
orf19.2213	orf19.2213	0.00117567	0.831098	0.00279723	0.675353	-0.000761592	0.747416	0.00138966	0.735241	Predicted ORF in Assemblies 19, 20 and 21
orf19.2214	orf19.2214	0.00596262	0.160434	0.007923	0.045618	0.00343004	0.27117	0.00476513	0.363584	Predicted ORF in Assemblies 19, 20 and 21
orf19.2215	GLE1	0.00470799	0.156063	0.00112853	0.801435	-0.00274795	0.67156	0.00501964	0.415654	Predicted ORF in Assemblies 19, 20 and 21; moderately induced at 42 deg
orf19.2219	ORF298	-0.00580736	0.411349	0.00459333	0.38113	0.00389438	0.13217	0.0082081	0.0853937	Predicted ORF in retrotransposon Tca3 with similarity to the Gag-Pol region of retrotransposons, which encodes nucleocapsid-like protein, reverse transcriptase, protease, and integrase; transcription is a-specific, alpha-factor induced
orf19.2229	orf19.2229	-0.000424045	0.932417	0.00334973	0.0822268	0.00170953	0.600107	0.00259142	0.455383	Predicted ORF in Assemblies 19, 20 and 21
orf19.2231	orf19.2231	-0.00544908	0.047408	-0.00326364	0.27103	-0.00107623	0.757932	-0.00110867	0.786256	Predicted ORF in Assemblies 19, 20 and 21
orf19.2236	orf19.2236	0.0121286	0.122998	-0.00701241	0.398071	0.0116791	0.051301	-0.00956678	0.456533	Protein with forkhead domain; similar to Fhl1p
orf19.2237	SPR1	0.00511474	0.142814	0.0032737	0.389495	0.00582151	0.178217	0.00741379	0.179442	Putative GPI-anchored protein; not essential for viability; similar to S. cerevisiae Spr1p, which is a sporulation-specific exo-1,3-beta-glucanase
orf19.2237.1	orf19.2237.1	-0.00702891	0.65612	-0.0249558	0.502173	0.00792988	0.413298	-0.0134036	0.157766	Predicted ORF in Assembly 20 and 21; gene has intron
orf19.2238	LTE1	-0.00185788	0.580731	0.00394505	0.161622	-0.0017369	0.555649	-0.000328442	0.925887	Protein similar to S. cerevisiae Lte1p; transcription is repressed in response to alpha pheromone in SpiderM medium
orf19.2241	PST1	-0.00777782	0.273357	-0.0167974	0.372044	-0.00139782	0.740593	-0.00192083	0.705835	Protein described as 1,4-benzoquinone reductase; biofilm induced; hyphal-induced expression, regulated by Cyr1p, Ras1p, Efg1p, Nrg1p, Rfg1p, Tup1p
orf19.2244	orf19.2244	0.0109701	0.0127066	0.00625473	0.47352	0.00485018	0.323002	0.00203025	0.733444	Similar to oxidoreductases and to S. cerevisiae Yjr096wp; transcription is negatively regulated by Sfu1p; increased transcription is observed upon benomyl treatment; decreased expression observed in an ssr1 homozygous null mutant
orf19.2245	YPT72	-8.73162e-05	0.987027	0.00289648	0.518825	-0.0107522	0.144198	0.00353807	0.419995	Vacuolar Rab small monomeric GTPase involved in vacuolar biogenesis; involved in filamentous growth and virulence
orf19.2249	orf19.2249	-0.000503584	0.956228	-0.00151337	0.88711	0.00142396	0.746352	-0.000130395	0.982376	Predicted ORF in Assemblies 19, 20 and 21; decreased expression observed in an ssr1 homozygous null mutant
orf19.2256	orf19.2256	-0.0025189	0.903423	-0.00982209	0.682193	-0.00631147	0.500141	-0.0131122	0.408068	Predicted ORF in Assemblies 19, 20 and 21
orf19.2258	orf19.2258	0.00162458	0.620752	0.000251158	0.939883	-9.80702e-05	0.979125	0.00221395	0.502966	Predicted ORF in Assemblies 19, 20 and 21
orf19.2261	orf19.2261	-0.00639081	0.523388	-0.00384352	0.781237	0.00123308	0.941925	0.00357565	0.712612	Predicted ORF in Assemblies 19, 20 and 21
orf19.2264	OLE2	0.00630042	0.350425	0.00710263	0.160731	0.00345611	0.622787	0.00806696	0.350578	Protein with similarity to fatty acid desaturase (stearoyl-CoA desaturase); homozygous null mutant shows decreased production of prostaglandin E2
orf19.2265	orf19.2265	0.00703298	0.0771228	-0.00660851	0.509498	4.2214e-05	0.994045	0.00115603	0.885365	Predicted ORF in Assemblies 19, 20 and 21
orf19.2267	RFA2	-0.00603969	0.546305	-0.00947616	0.771363	0.00690853	0.32178	0.00306762	0.877536	Protein described as DNA replication factor A; RNA abundance regulated by cell cycle, tyrosol and cell density
orf19.2268	RCK2	-0.00244639	0.814751	0.00181181	0.849953	0.0040764	0.480386	-0.00526228	0.641057	Predicted MAP kinase-activated protein kinase, similar to S. cerevisiae serine/threonine protein kinase Rck2p; induced by osmotic stress via Hog1p; macrophage/pseudohyphal-repressed; mutants are sensitive to rapamycin
orf19.2269	orf19.2269	-0.0119256	0.0703301	-0.0132266	0.248837	-0.0139173	0.133919	-0.0232889	0.263284	Putative 3-phosphoserine phosphatase; fungal-specific (no human or murine homolog); increased transcription is observed upon benomyl treatment or in an azole-resistant strain that overexpresses MDR1
orf19.227	COX7	0.000524762	0.916281	-0.000729739	0.917149	0.000962179	0.730729	0.000559133	0.884364	Predicted ORF in Assemblies 19, 20 and 21; flucytosine induced; repressed by nitric oxide
orf19.2270	SMF12	0.00434086	0.654314	0.00911393	0.0404873	0.0035113	0.298538	0.00300426	0.580284	Protein not essential for viability; similar to S. cerevisiae Smf1p, which is a manganese transporter; Gcn4p-regulated; alkaline upregulated; caspofungin repressed
orf19.2272	orf19.2272	0.00196205	0.688529	0.00230951	0.773083	0.00541123	0.107742	0.006624	0.192377	Predicted ORF in Assemblies 19, 20 and 21
orf19.2274	orf19.2274	0.0106972	0.473854	-0.0378704	0.221149	0.0082926	0.537829	0.0181472	0.353684	Predicted ORF in Assemblies 19, 20 and 21; possibly spurious ORF (Annotation Working Group prediction)
orf19.2277	TPK2	-0.0189681	0.351644	-0.0197564	0.156287	-0.00821973	0.67156	-0.0177676	0.360835	Catalytic subunit of cAMP-dependent protein kinase (PKA), isoform of Tpk1p; required for wild-type epithelial cell damage and engulfment and oral (not systemic) virulence in mouse; involved in control of morphogenesis and stress response
orf19.2278	orf19.2278	2.74059e-05	0.995128	0.00190425	0.695897	0.00379459	0.223482	0.00121001	0.907214	Predicted ORF in Assemblies 19, 20 and 21; filament induced; transcription is induced in response to alpha pheromone in SpiderM medium
orf19.2280	ZCF10	-0.00675632	0.193899	-0.00274977	0.549198	0.000873657	0.854647	-0.00522467	0.332403	Putative transcription factor with zinc cluster DNA-binding motif
orf19.2281	orf19.2281	-0.00187803	0.613995	0.00107459	0.860475	-0.00178262	0.757572	-0.00103951	0.702134	Predicted ORF in Assemblies 19, 20 and 21
orf19.2284	orf19.2284	-0.00638787	0.162874	-0.00383519	0.435187	-0.00505069	0.416012	0.00123812	0.811806	Predicted ORF in Assemblies 19, 20 and 21
orf19.229	orf19.229	0.00555784	0.478783	0.0036886	0.755226	0.0040111	0.451718	0.00891359	0.0903152	Predicted ORF in Assemblies 19, 20 and 21
orf19.230	orf19.230	-0.306116	0.00453907	-0.178636	0.281815	-0.281834	0.00553821	-0.264853	0.00857029	Predicted ORF in Assemblies 19, 20 and 21
orf19.2302	orf19.2302	0.00181969	0.770765	0.0054775	0.225961	0.000892953	0.903509	-0.00369481	0.482037	Predicted ORF in Assemblies 19, 20 and 21
orf19.2308	orf19.2308	0.00661706	0.138324	0.00285755	0.625547	0.00115688	0.887899	0.00703174	0.225276	Predicted ORF in Assemblies 19, 20 and 21
orf19.2309	orf19.2309	0.00464867	0.377147	0.00311571	0.803088	0.00301393	0.55987	-0.000236778	0.982066	Predicted ORF in Assemblies 19, 20 and 21
orf19.2312	orf19.2312	0.0045321	0.188985	0.00370099	0.309715	0.00430304	0.209642	0.00564615	0.197887	Predicted ORF in Assemblies 19, 20 and 21; similar to ferric reductase Fre10p
orf19.2313	orf19.2313	0.00235908	0.481684	0.00291495	0.755226	0.00136588	0.608925	-0.0030477	0.780142	Predicted ORF in Assemblies 19, 20 and 21
orf19.2315	orf19.2315	-0.00406622	0.73961	-0.0137175	0.584898	0.00401793	0.595717	-0.00432635	0.73455	Putative transcription factor with bZIP DNA-binding motif
orf19.2317	orf19.2317	0.000254083	0.984076	-0.00162776	0.885256	0.00312115	0.761375	0.0085027	0.507547	Predicted ORF in Assemblies 19, 20 and 21; transcription is induced in response to alpha pheromone in SpiderM medium
orf19.2320	orf19.2320	-0.011809	0.546134	0.00488589	0.854633	-0.0121131	0.346907	-0.00535989	0.583722	Predicted ORF in Assemblies 19, 20 and 21
orf19.2322.3	orf19.2322.3	0.0140708	0.062066	0.0127293	0.206848	0.0104751	0.226626	-0.00655981	0.623129	ORF Predicted by Annotation Working Group
orf19.2330	orf19.2330	-0.00375676	0.302208	0.0029963	0.543877	-0.00457008	0.473964	-0.0077926	0.35459	Predicted ORF in Assemblies 19, 20 and 21; transposon mutation affects filamentous growth; decreased expression in response to prostaglandins
orf19.2332	orf19.2332	0.00070459	0.848662	-0.00219381	0.67326	-0.00275378	0.115237	0.00196353	0.381942	Predicted ORF in Assemblies 19, 20 and 21
orf19.2333	orf19.2333	-0.00148688	0.898492	-0.000612592	0.980178	0.0198737	0.0798335	-0.0173258	0.218856	Predicted ORF in Assemblies 19, 20 and 21
orf19.2335	orf19.2335	0.000735022	0.92202	-2.75155e-05	0.995713	0.00247389	0.526613	0.00545238	0.404803	Predicted ORF in Assemblies 19, 20 and 21; mutation confers hypersensitivity to 5-fluorouracil (5-FU); Hog1p-induced; protein detected by mass spec in stationary phase cultures
orf19.2340	CDC48	-0.00178655	0.768228	0.00113245	0.788255	-0.00449249	0.456862	-0.00136317	0.529916	Protein described as microsomal ATPase; regulated by Gcn2p and Gcn4p; induced in response to amino acid starvation (3-aminotriazole treatment); macrophage/pseudohyphal-repressed
orf19.2343	VPS23	0.0030252	0.580227	0.000571895	0.936798	0.0105971	0.0960173	0.00926452	0.178049	Protein involved in proteolytic activation of Rim101p, which regulates pH response; similar to S. cerevisiae Stp22p/Vps23p, which is a member of the ESCRT I protein sorting complex
orf19.2344	ASR1	0.00886172	0.143831	-0.00205754	0.832288	0.0111601	0.0090548	0.00303079	0.49902	Protein described as similar to heat shock proteins; transcription regulated by cAMP, osmotic stress, ciclopirox olamine, ketoconazole; negatively regulated by Cyr1p, Ras1p; shows colony morphology-related gene regulation by Ssn6p
orf19.2346	orf19.2346	0.00543793	0.20651	0.000712279	0.926552	0.00312675	0.349313	0.00470605	0.45436	Putative protein of unknown function, transcription is positively regulated by Tbf1p; predicted ORF in Assemblies 19, 20 and 21
orf19.2347	MNN2	-0.00509614	0.587599	0.00416987	0.842196	0.00215064	0.478511	-0.00585982	0.570357	Alpha-1,2-mannosyltransferase; likely involved in iron utilization in the endocytosis pathway under iron-limiting conditions; similar to S. cerevisiae Mnn2p and Mnn5p; transposon mutation affects filamentous growth; filament induced
orf19.2350	orf19.2350	0.0142127	0.0425367	0.00941377	0.502157	0.00614323	0.564181	0.00405293	0.611934	Protein similar to S. cerevisiae Yor0378wp; transposon mutation affects filamentous growth; not essential for viability; member of MFS family of transporters; fungal-specific (no human or murine homolog)
orf19.2351	NIT3	0.00693385	0.134602	0.00567479	0.626151	-0.000650981	0.871275	0.0036941	0.537048	Predicted ORF in Assemblies 19, 20 and 21; regulated by Gcn2p and Gcn4p; protein detected by mass spec in exponential and stationary phase cultures
orf19.2352	orf19.2352	0.0168744	0.167654	-0.027305	0.339469	-0.0134133	0.433501	0.00566225	0.66858	Predicted ORF in Assemblies 19, 20 and 21
orf19.2360	URA2	0.00833198	0.310023	0.00939676	0.198707	0.00563445	0.316836	-0.000127581	0.986817	Predicted ORF in Assemblies 19, 20 and 21; flucytosine induced; macrophage/pseudohyphal-induced; intron in 5'-UTR
orf19.2362	orf19.2362	0.00151687	0.507297	0.00473833	0.345045	0.000752677	0.841843	0.00249458	0.159235	Predicted ORF in Assemblies 19, 20 and 21
orf19.2364	MIS11	0.0100602	0.120882	0.000573892	0.959332	0.00775078	0.480386	0.00204182	0.858044	Similar to precursor of mitochondrial C1-tetrahydrofolate synthase; putative protein of glycine catabolism; downregulated by Efg1p; fluconazole-induced; protein detected by mass spec in stationary phase cultures
orf19.2365	POL2	-0.0850257	0.0471045	-0.26644	0.0357536	-0.149417	0.0200482	-0.2451	0.0133078	Protein described as DNA polymerase epsilon; transcriptionally induced by interaction with macrophage; transcription is regulated by Tup1p; periodic mRNA expression, peak at cell-cycle G1/S phase
orf19.2366	orf19.2366	0.00225325	0.483108	-0.00102331	0.785503	0.00228202	0.680472	0.0027567	0.478818	Predicted ORF in Assemblies 19, 20 and 21
orf19.2368	orf19.2368	0.00507092	0.0479158	0.00441948	0.463482	0.00215948	0.340964	-0.00151488	0.417422	Predicted ORF in Assemblies 19, 20 and 21
orf19.2376	orf19.2376	0.000772239	0.837468	-0.000136453	0.97848	-0.00298413	0.406562	0.0016912	0.490251	Predicted ORF in Assemblies 19, 20 and 21
orf19.238	CCP1	-0.000285975	0.96359	0.00227433	0.712257	-0.00988583	0.563151	0.00361311	0.367217	Similar to cytochrome-c peroxidase N terminus; transcription is negatively regulated by Rim101p or alkaline pH; transcription induced by interaction with macrophage or low iron; oxygen-induced activity
orf19.2381	orf19.2381	0.00542842	0.200156	0.00648263	0.0400341	0.00235253	0.661988	0.00542225	0.271669	Predicted ORF in Assemblies 19, 20 and 21
orf19.2382	orf19.2382	0.00982378	0.38018	0.00446279	0.656809	0.0109241	0.0972013	0.00987377	0.0842617	Predicted ORF in Assemblies 19, 20 and 21; similar to isoleucyl-tRNA synthetase; isoleucyl-tRNA synthetase is the target of drugs including the cyclic beta-amino acid icofungipen/PLD-118/BAY-10-8888 and mupirocin
orf19.2383	YKU80	0.00305713	0.202619	0.00330984	0.0544364	-3.51737e-05	0.991121	0.00279313	0.481559	Protein described as DNA double-strand break repair factor
orf19.2384	orf19.2384	0.00963609	0.108749	0.000450792	0.964502	0.00511198	0.355652	0.00244506	0.515598	Predicted ORF in Assemblies 19, 20 and 21
orf19.2387	orf19.2387	-0.00149554	0.852999	0.00150959	0.881291	0.00474055	0.458874	0.00117471	0.925929	Putative tRNA-Pro synthetase; genes encoding ribosomal subunits, translation factors, and tRNA synthetases are downregulated upon phagocytosis by murine macrophage
orf19.2389	orf19.2389	0.00709507	0.0806868	-0.00335862	0.677799	-0.00245054	0.702357	-0.00202347	0.790087	Predicted ORF in Assemblies 19, 20 and 21
orf19.239	orf19.239	0.00245188	0.56671	0.00163956	0.799686	0.00527796	0.26789	0.00642044	0.0188256	Predicted ORF in Assemblies 19, 20 and 21; induced by nitric oxide
orf19.2391	orf19.2391	0.00463337	0.3752	0.00732284	0.508352	0.00264489	0.598197	0.00400096	0.648057	Predicted ORF in Assemblies 19, 20 and 21
orf19.2393	orf19.2393	0.00619467	0.658321	0.00785288	0.454719	0.0160605	0.0911968	0.005729	0.551137	Putative transcription factor with zinc finger DNA-binding motif
orf19.2394	orf19.2394	-0.00793493	0.593283	-0.00554547	0.791433	0.00227754	0.873678	0.00592099	0.753071	Predicted ORF in Assemblies 19, 20 and 21
orf19.2395	IME2	-0.00369284	0.752595	-0.00518713	0.780761	-0.00013638	0.980147	-0.0119198	0.166106	Predicted ORF in Assemblies 19, 20 and 21; mutation confers hypersensitivity to amphotericin B
orf19.2397.3	orf19.2397.3	-0.0330545	0.0265872	-0.0194351	0.0800391	-0.00674431	0.617749	-0.0177511	0.0400431	ORF Predicted by Annotation Working Group
orf19.2398	orf19.2398	0.00565168	0.274236	0.00217245	0.646252	-0.00746164	0.549657	0.0087137	0.193956	Predicted ORF in Assemblies 19, 20 and 21; possible increased transcription in an azole-resistant strain that overexpresses CDR1 and CDR2; possibly transcriptionally regulated by Tac1p; induced by Mnl1p under weak acid stress
orf19.2399	orf19.2399	-0.00389457	0.611031	0.00485621	0.293724	0.00213808	0.456862	0.00434381	0.27352	Putative transcription factor with zinc finger DNA-binding motif; similar to bacterial DnaJ; transcriptionally regulated by iron; expression greater in low iron
orf19.24	RTA2	-0.0080639	0.452795	0.00580581	0.253296	0.00123367	0.888913	0.00745379	0.258295	Putative floppase; required for sphingolipid long chain base release; mediates calcineurin-dependent resistance to azoles; stress-associated protein; Ca2+, calcineurin-regulated; ketoconazole, caspofungin induced; Plc1p-regulated
orf19.240	orf19.240	-0.00678021	0.600457	0.00256578	0.852245	-0.000973231	0.905362	-0.0145289	0.328148	Predicted ORF in Assemblies 19, 20 and 21
orf19.2401	orf19.2401	-0.000899522	0.932417	0.00151557	0.957026	0.00543193	0.406595	0.00922016	0.383317	Predicted ORF in Assemblies 19, 20 and 21
orf19.2402	SSU72	0.00734502	0.357308	0.00271468	0.832391	-0.00278843	0.835355	-0.000724127	0.958395	Predicted ORF in Assemblies 19, 20 and 21
orf19.2411	orf19.2411	-0.0224973	0.130088	-0.0275738	0.248199	-0.00253347	0.709619	-0.0202453	0.279662	Predicted ORF in Assemblies 19, 20 and 21
orf19.2416.1	MLC1	0.00734748	0.278934	0.00574748	0.521107	-0.0016378	0.831489	-0.0106	0.533154	Protein with microtubule-dependent localization to the Spitzenkorper, also localizes to cytokinetic ring in hyphae; cell-cycle dependent localization to bud tip (polarisome) and bud neck in yeast and pseudohyphal cells
orf19.2417	SMC5	-0.0106323	0.520911	-0.00483623	0.536222	0.00551407	0.609552	-0.00107177	0.884364	Predicted ORF in Assemblies 19, 20 and 21; similar to S. cerevisiae Yol034wp, which is involved in DNA repair; transposon mutation affects filamentous growth
orf19.2418	orf19.2418	-0.0966007	0.00953168	-0.128055	0.0205686	-0.0746939	0.0117774	-0.120604	0.0256307	Predicted ORF in Assemblies 19, 20 and 21
orf19.2419	orf19.2419	0.00296419	0.682404	0.00186495	0.83944	0.00534594	0.168433	0.00305693	0.581118	Predicted ORF in Assemblies 19, 20 and 21
orf19.2422	ARC1	0.000463382	0.973668	0.010117	0.252565	0.00707009	0.260398	-0.00140645	0.901468	Predicted ORF in Assemblies 19, 20 and 21; macrophage/pseudohyphal-repressed; protein detected by mass spec in stationary phase cultures
orf19.2425	HGT18	0.00181161	0.711008	-0.00147637	0.871872	0.00220073	0.678511	-0.00800198	0.0715248	Putative glucose transporter of the major facilitator superfamily; the C. albicans glucose transporter family comprises 20 members; 12 probable membrane-spanning segments; expressed in rich medium with 2% glucose
orf19.2426	orf19.2426	-0.00103545	0.797972	-0.000564332	0.832382	-0.00573215	0.187123	0.000352097	0.940715	Predicted ORF in Assemblies 19, 20 and 21
orf19.2429	orf19.2429	0.0191751	0.019275	-0.0489436	0.339469	0.0116512	0.48449	0.0220907	0.168387	Predicted ORF in Assemblies 19, 20 and 21; transcription is induced in response to alpha pheromone in SpiderM medium
orf19.243	OXR1	-0.0221999	0.143644	-0.0275234	0.154924	0.00298845	0.801419	-0.00642619	0.794711	Predicted ORF in Assemblies 19, 20 and 21
orf19.2430	orf19.2430	0.00316699	0.247138	0.00931955	0.161622	-0.000926371	0.854134	0.000322997	0.932386	Predicted ORF in Assemblies 19, 20 and 21
orf19.2432	HAC1	-0.0427405	0.00615707	-0.0340489	0.0940802	-0.0239225	0.205337	-0.0809628	0.0920479	Putative transcription factor involved in unfolded protein response and control of cell morphology; transcript undergoes atypical splicing at C terminus under ER stress; induced during the mating process; caspofungin induced
orf19.2436	orf19.2436	-0.000233723	0.959075	0.00301419	0.656809	-0.000349689	0.897536	-0.00390613	0.417253	Predicted ORF in Assemblies 19, 20 and 21
orf19.2439.1	orf19.2439.1	-0.0891616	0.135553	-0.0808888	0.230091	-0.081299	0.186179	-0.0750192	0.232982	ORF Predicted by Annotation Working Group
orf19.2443	RGD1	3.20709e-05	0.996962	0.00222388	0.886154	-0.000936431	0.86433	0.00702953	0.417232	Protein described as a GTPase activator; transcriptionally regulated by iron; expression greater in low iron; alkaline upregulated
orf19.2444	CHS7	-0.00178529	0.765051	0.00214397	0.927226	-0.00917231	0.163559	0.000519954	0.904462	Protein required for wild-type chitin synthase III activity; similar to (but not functional homolog of) S. cerevisiae Chs7p, which effects ER export of Chs3p; induced in homozygous cyr1 null mutant hyphae and ras1 yeast-form cells
orf19.2445	orf19.2445	0.00349113	0.399462	-0.000359496	0.91624	-0.00247802	0.42827	0.00220438	0.543933	Putative dicarboxylic amino acid permease; fungal-specific (no human or murine homolog); transcription is induced in response to alpha pheromone in SpiderM medium
orf19.2449	orf19.2449	-0.000533408	0.936116	0.007765	0.169018	0.00138739	0.767852	0.00176322	0.882055	Predicted ORF in Assemblies 19, 20 and 21; macrophage-induced gene
orf19.245	DDC1	0.0109155	0.0755644	0.00223541	0.755226	0.0101186	0.169464	0.0114764	0.0125848	Transcription is induced during filamentous growth; regulated by Nrg1p, Tup1p
orf19.2451	PGA45	-0.000319743	0.975496	-0.00310562	0.657637	0.000961514	0.747142	0.000585495	0.905556	Cell wall protein; putative GPI-anchor; downregulated in core caspofungin response; Hog1p-induced; regulated by Ssn6p; Mob2p-dependent hyphal regulation; possibly spurious ORF (Annotation Working Group prediction)
orf19.2452	orf19.2452	-0.0255729	0.0870476	-0.0366156	0.0811553	-0.0239696	0.104064	-0.0307989	0.0895112	Transcriptionally regulated by iron; expression greater in high iron; downregulated in core caspofungin response; ketoconazole-repressed; shows colony morphology-related gene regulation by Ssn6p; possibly subject to Kex2p processing
orf19.2454	PHO87	-0.00833445	0.410453	0.0208577	0.0232259	0.00445818	0.673415	-0.00326059	0.891925	Protein similar to phosphate permeases; transcription is negatively regulated by Rim101p at pH 8; expression is regulated upon white-opaque switching; caspofungin repressed; biofilm-regulated; virulence-group-correlated expression
orf19.2455	orf19.2455	-0.00187726	0.814435	-0.0105896	0.296923	0.00427913	0.693958	-0.002315	0.768243	Predicted ORF in Assemblies 19, 20 and 21
orf19.2457	orf19.2457	0.0104337	0.44854	0.00286382	0.919289	0.00945668	0.479743	0.0100202	0.548801	Predicted ORF in Assemblies 19, 20 and 21
orf19.2459	orf19.2459	-0.000337906	0.932922	-0.00611815	0.523276	-0.000546787	0.941925	-0.00283967	0.811515	Predicted ORF in Assemblies 19, 20 and 21
orf19.246	orf19.246	0.002809	0.543208	0.00333071	0.654736	0.00119316	0.802401	0.00789452	0.383317	Predicted ORF in Assemblies 19, 20 and 21; fungal-specific (no human or murine homolog)
orf19.2460	orf19.2460	0.00685717	0.2493	-0.00126115	0.851176	0.00769092	0.201329	0.010041	0.221739	Predicted ORF in Assemblies 19, 20 and 21; exogenously expressed protein is a substrate for Kex2p processing in vitro; transcription is repressed in response to alpha pheromone in SpiderM medium
orf19.2461	PRN4	0.00773679	0.287883	-0.0192647	0.45726	0.00276851	0.828593	-0.00283321	0.806708	Protein with similarity to pirins; increased transcription is observed upon benomyl treatment
orf19.2463	PRN2	-0.0036165	0.536621	-0.0133605	0.337879	-0.00823855	0.634977	-0.00536051	0.682497	Predicted ORF in Assemblies 19, 20 and 21; similar to pirin
orf19.2465	POL32	-0.00374577	0.743702	0.00544742	0.877853	-0.0113153	0.169464	0.00771089	0.455215	Predicted ORF in Assemblies 19, 20 and 21; cell-cycle regulated periodic mRNA expression
orf19.2468	orf19.2468	-0.0123412	0.234023	0.0100488	0.548831	0.00537735	0.1833	0.00551941	0.437333	Predicted ORF in Assemblies 19, 20 and 21
orf19.2469	RAD10	0.00977648	0.202619	0.00256364	0.843854	0.00152079	0.845596	-0.00120988	0.816369	Ortholog of S. cerevisiae RAD10, an endonuclease involved in nucleotide excision repair; null mutant is extremely sensitive to UV irradiation; transcription is downregulated in alkaline conditions
orf19.2471	GIM5	-0.00594673	0.463046	0.00225037	0.772065	0.00485261	0.231196	-0.00147487	0.894692	Predicted ORF in Assemblies 19, 20 and 21; macrophage/pseudohyphal-repressed gene and macrophage-induced protein
orf19.2472	orf19.2472	-0.00185284	0.399839	0.00393322	0.673709	-0.00091232	0.849998	0.000216729	0.952372	Predicted ORF in Assemblies 19, 20 and 21
orf19.2474	PRC3	0.00386726	0.309079	0.00159104	0.788255	-0.00254323	0.737545	0.00300301	0.426497	Transcription is regulated by Nrg1p and Mig1p; regulated by Gcn2p and Gcn4p
orf19.2476	orf19.2476	-0.309345	0.011084	-0.328514	0.0317663	-0.319791	0.0194331	-0.252165	0.094278	Predicted ORF in Assemblies 19, 20 and 21
orf19.2478	orf19.2478	-0.0173612	0.17945	-0.00412639	0.926824	-0.00509354	0.433501	-0.0158306	0.293315	Predicted ORF in Assemblies 19, 20 and 21
orf19.2478.1	orf19.2478.1	0.00798276	0.310552	-0.00328071	0.800976	0.00531834	0.399837	0.00661826	0.413252	ORF Predicted by Annotation Working Group
orf19.2479	UGA4	0.00093071	0.701774	0.00758914	0.0418753	0.00378232	0.120597	0.000581848	0.876035	Putative gamma-aminobutyric acid/polyamine permease; nitrogen catabolite repressed gene, induced in absence of preferred N sources; transcriptionally induced upon phagocytosis by macrophage; gene regulation by nitrogen source requires Gat1p
orf19.248	APL5	-0.00709634	0.477442	0.000181483	0.994729	-0.000388665	0.975061	-0.00274596	0.816095	Phosphorylated protein, not essential for viability; similar to S. cerevisiae Apl5p, which is a subunit of the AP-3 adaptor complex involved in Golgi-to-vacuole transport
orf19.2480.1	AUT7	-0.00327532	0.556426	0.00466338	0.488356	0.00358987	0.554643	0.00667573	0.539351	ORF Predicted by Annotation Working Group; macrophage/pseudohyphal-repressed; intron in 5'-UTR
orf19.2483	RIM1	0.0117068	0.242155	0.00557208	0.71018	-0.0295469	0.187388	-0.0016492	0.95477	Predicted ORF in Assemblies 19, 20 and 21; protein level decreased in stationary phase cultures
orf19.2488	FAL1	-0.0699012	0.122585	-0.0526815	0.108851	-0.0729317	0.00233562	-0.122104	0.0133544	Predicted ORF in Assemblies 19, 20 and 21
orf19.2489	orf19.2489	0.0031659	0.544189	0.00497199	0.517045	0.00298799	0.56455	0.00214629	0.720819	Predicted ORF in Assemblies 19, 20 and 21; repressed by nitric oxide
orf19.2494	orf19.2494	-0.00137878	0.732319	0.00682667	0.115521	0.0033844	0.100828	0.00825441	0.299796	Predicted ORF in Assemblies 19, 20 and 21
orf19.2495	GSL1	-0.00384702	0.76708	0.00626854	0.537368	0.0125427	0.106466	0.00249042	0.749782	Subunit of beta-1,3-glucan synthase; 10 predicted membrane-spanning regions; caspofungin induced; mRNA abundance declines after yeast-to-hyphal transition; similar to S. cerevisiae Fks3p; fungal-specific (no human or murine homolog)
orf19.25	orf19.25	-0.000472938	0.953088	0.00383659	0.495937	-0.00122544	0.84329	-0.00633505	0.40393	Predicted ORF in Assemblies 19, 20 and 21
orf19.250	SLC1	0.0109311	0.0579704	0.00417065	0.837297	0.00842504	0.40034	0.00267095	0.907214	Protein repressed during the mating process
orf19.2500	orf19.2500	0.00822741	0.380286	0.00157998	0.956611	0.00264638	0.802401	0.00872789	0.17415	Predicted ORF in Assemblies 19, 20 and 21
orf19.2503	orf19.2503	0.00231747	0.801492	0.00450787	0.580096	-0.00547906	0.444005	0.00184344	0.90583	Predicted ORF in Assemblies 19, 20 and 21
orf19.2504	BMS1	-0.0293609	0.00196037	-0.0115539	0.594422	-0.03268	0.0264543	-0.0176966	0.0755563	Predicted ORF in Assemblies 19, 20 and 21; mutation confers resistance to 5-fluorocytosine (5-FC); flucytosine induced; decreased expression in response to prostaglandins
orf19.2506	orf19.2506	-0.0107739	0.10201	0.00148553	0.871872	-0.00713136	0.0854698	0.00774151	0.292013	Predicted ORF in Assemblies 19, 20 and 21; opaque-specific transcription; Hog1p-downregulated
orf19.2507	ARP9	-0.00957096	0.167654	-0.0308756	0.0742096	-0.0139098	0.122283	-0.014899	0.140837	Protein likely to be essential for growth, based on an insertional mutagenesis strategy; similar to S. cerevisiae Arp3p, which is a component of the Arp2/3 complex involved in actin-dependent processes
orf19.2508	PRM9	0.00764511	0.125027	0.00928439	0.163578	0.00674754	0.269898	0.00773524	0.127364	Protein not essential for viability; similar to S. cerevisiae Prm9p, which may bind to COPII coated vesicles
orf19.2511.1	MRPL33	0.0129385	0.0671929	0.00482619	0.344647	0.00930581	0.163559	-0.000245867	0.975692	ORF predicted by Annotation Working Group; increased expression observed in an ssr1 homozygous null mutant; transcription is upregulated in both intermediate and mature biofilms
orf19.2512	orf19.2512	0.00238259	0.673526	-0.00655508	0.757061	0.000558042	0.933571	-0.00552834	0.18537	Predicted ORF in Assemblies 19, 20 and 21; possibly spurious ORF (Annotation Working Group prediction)
orf19.2514	orf19.2514	0.000407571	0.929673	0.000920084	0.917149	-0.00396469	0.0732236	0.00254177	0.737557	Predicted ORF in Assemblies 19, 20 and 21
orf19.2515	orf19.2515	0.00575619	0.209884	0.000141405	0.99025	0.00569844	0.386913	0.0103566	0.273873	Predicted ORF in Assemblies 19, 20 and 21
orf19.2516	orf19.2516	0.00335121	0.520911	0.00256282	0.881758	0.000719028	0.928861	0.00646359	0.451634	Predicted ORF in Assemblies 19, 20 and 21
orf19.2518	orf19.2518	0.000171965	0.969868	-5.92255e-05	0.993216	0.00695598	0.29921	0.00185728	0.369558	Predicted ORF in Assemblies 19, 20 and 21
orf19.2520	orf19.2520	0.0109107	0.287883	0.00978675	0.254472	0.00495078	0.703539	0.00247014	0.823225	Predicted ORF in Assemblies 19, 20 and 21
orf19.2521	orf19.2521	0.0060843	0.529307	-0.0251406	0.23202	0.00650791	0.308422	-0.00126779	0.901468	Predicted ORF in Assemblies 19, 20 and 21
orf19.2527	orf19.2527	0.00620042	0.354916	-0.000545685	0.937021	0.00594617	0.434265	0.00756912	0.298572	Predicted ORF in Assemblies 19, 20 and 21; induced upon biofilm formation
orf19.2528	orf19.2528	-0.00677799	0.592303	-0.00335272	0.803088	-0.0128163	0.197568	-0.0253056	0.204562	Predicted ORF in Assemblies 19, 20 and 21; flucytosine repressed
orf19.2529	orf19.2529	4.04889e-05	0.996081	0.00590838	0.357096	-0.00139653	0.79606	-0.00207597	0.847897	Predicted ORF in Assemblies 19, 20 and 21; shares similarity with human Pig-H, which is involved in glycosylphosphatidylinositol assembly
orf19.2531	CSP37	0.000560055	0.916743	0.0063062	0.150708	-0.00334636	0.603046	-0.00137552	0.805053	Plasma membrane, hyphal cell wall protein; role in progression of murine systemic infection; predicted P-loop, divalent cation binding, N-glycosylation sites; expressed in yeast and hyphae; hyphal downregulated; lacks S. cerevisiae homolog
orf19.2533.1	orf19.2533.1	-0.287881	0.00196037	-0.258286	0.0506974	-0.180564	0.0115725	-0.136694	0.000336139	ORF Predicted by Annotation Working Group
orf19.2534	PIN4	-0.00301159	0.736402	0.0011896	0.947463	0.00213124	0.511256	-0.00569306	0.452877	Protein with similarity to S. cerevisiae Pin4p; transposon mutation affects filamentous growth
orf19.2538	PTC2	-0.0210038	0.557629	-0.055702	0.0496289	-0.00393314	0.706658	-0.0171951	0.5793	Putative protein phosphatase of the Type 2C-related family (serine/threonine-specific), similar to S. cerevisiae Ptc2p and Ptc3p; mutant shows virulence defect
orf19.2546	TRP2	-0.00603903	0.33586	-0.00721371	0.543635	-0.00406523	0.535164	-0.0161511	0.00863992	Predicted ORF in Assemblies 19, 20 and 21; regulated by Gcn2p and Gcn4p
orf19.2547	orf19.2547	-0.00143122	0.852999	-0.00204395	0.808398	0.0012241	0.883369	0.00436701	0.700899	Predicted ORF in Assemblies 19, 20 and 21
orf19.2549	orf19.2549	-0.00658324	0.603698	0.00286556	0.466703	0.00333411	0.308422	0.00411896	0.308673	Predicted ORF in Assemblies 19, 20 and 21
orf19.2551	MET6	-0.011741	0.38307	0.00625006	0.570532	0.00625394	0.479973	-0.00437474	0.618204	Essential 5-methyltetrahydropteroyltriglutamate-homocysteine methyltransferase (cobalamin-independent methionine synthase); antigenic during murine or human systemic infection; heat shock, estrogen, possibly biofilm, and GCN-induced
orf19.2552	orf19.2552	0.000368099	0.932376	0.00345987	0.620745	-0.000131915	0.968092	0.0085599	0.34721	Protein similar to S. cerevisiae Pmr1p; amphotericin B induced; previously merged with orf19.2553; unmerged from orf19.2553 in a revision of Assembly 21
orf19.2558	orf19.2558	0.00108626	0.726348	0.00125478	0.772312	0.00168262	0.692598	0.0031201	0.521884	Predicted ORF in Assemblies 19, 20 and 21
orf19.2559	CDC4	0.00568342	0.117008	-0.00360998	0.543014	-0.00556778	0.304379	-0.00135891	0.877536	F-box subunit of SCF(CDC4) ubiquitin ligase; functional homolog of S. cerevisiae Cdc4p; mutation or depletion causes hyperfilamentation; nonessential; Sol1p is a substrate of SCF-Cdc4p
orf19.2560	CDC60	0.00867237	0.243121	-0.00838653	0.530646	0.00043502	0.963992	0.000246891	0.978469	Cytosolic leucyl tRNA synthetase; has conserved amino acid and ATP binding class I signature, tRNA binding, and proofreading motifs; likely essential for growth; interacts with benzoxaborole antifungals; similar to S. cerevisiae Cdc60p
orf19.2563	orf19.2563	-0.00234514	0.754902	0.00501968	0.741009	-0.0221535	0.188683	-0.00310976	0.816369	Predicted ORF in Assemblies 19, 20 and 21
orf19.2564	orf19.2564	0.0037715	0.356287	0.00332575	0.59972	0.00202134	0.368882	0.00571596	0.374238	Predicted ORF in Assemblies 19, 20 and 21
orf19.2565	orf19.2565	0.00456673	0.356287	0.00235572	0.612037	-0.000483986	0.874754	0.00464526	0.563883	Predicted ORF in Assemblies 19, 20 and 21
orf19.2574	orf19.2574	0.00221029	0.837537	0.00299041	0.678348	0.00474589	0.429776	0.000149553	0.974183	Predicted ORF in Assemblies 19, 20 and 21
orf19.2575	orf19.2575	-0.00382493	0.299657	-0.00374271	0.526947	-0.00135833	0.768798	0.0052008	0.682614	Predicted ORF in Assemblies 19, 20 and 21
orf19.2579	orf19.2579	0.000559119	0.859097	-0.000477548	0.940439	-0.00041145	0.916647	0.00351565	0.713274	Predicted ORF in Assemblies 19, 20 and 21
orf19.2581	orf19.2581	-0.00637534	0.524024	-0.00602347	0.800848	0.000823868	0.891706	0.00877855	0.203014	Predicted ORF in Assemblies 19, 20 and 21
orf19.2582	orf19.2582	0.000321589	0.966545	0.00665038	0.320301	0.00295667	0.263917	0.00745599	0.06622	Predicted ORF in Assemblies 19, 20 and 21
orf19.2584	OPT9	-0.00162821	0.547183	0.000515821	0.949167	-0.00046626	0.94472	-0.000368858	0.958395	Probable pseudogene similar to fragments of OPT1 oligopeptide transporter gene; decreased expression in hyphae compared to yeast-form cells; transcriptionally induced upon phagocytosis by macrophage
orf19.2585	orf19.2585	-0.0100649	0.647794	-0.0123757	0.666315	0.00720796	0.339765	0.00238181	0.863331	Predicted ORF in Assemblies 19, 20 and 21; possibly spurious ORF (Annotation Working Group prediction)
orf19.2587	HNM3	-0.0035977	0.556426	-0.0223432	0.21036	-0.00271828	0.745661	0.00571258	0.326118	Predicted ORF in Assemblies 19, 20 and 21; flucytosine repressed
orf19.2590	orf19.2590	0.00310197	0.363976	-0.00835594	0.547431	0.000255606	0.980147	0.000743187	0.889479	Putative protein of unknown function, transcription is upregulated in clinical isolates from HIV+ patients with oral candidiasis; predicted ORF in Assemblies 19, 20 and 21
orf19.2597	MRS2	0.00959435	0.34008	0.0031256	0.937939	0.00639891	0.257473	-0.0127096	0.515598	Putative magnesium ion transporter, mitochondrial; fungal-specific (no human or murine homolog)
orf19.2602	OPT1	-0.00198679	0.859544	-0.00830111	0.781274	0.012343	0.174703	0.0098596	0.621545	Oligopeptide transporter; transports 3-to-5-residue peptides; alleles are distinct, one has intron; not ABC or PTR type transporter; suppresses S. cerevisiae ptr2-2 mutant defects; induced by BSA or peptides; Stp3p, Hog1p regulated
orf19.2604	orf19.2604	-0.0100891	0.292768	0.00254633	0.835767	0.00728003	0.0933231	0.00115291	0.825823	Predicted ORF in Assemblies 19, 20 and 21
orf19.2605	orf19.2605	0.00184419	0.844231	0.0104895	0.124388	0.0100801	0.168313	0.0060839	0.369558	Predicted ORF in Assemblies 19, 20 and 21
orf19.2606	HDA1	0.0105535	0.01091	0.00436645	0.643604	0.00433916	0.358391	0.00656277	0.483792	Histone deacetylase; regulates frequency of white-to-opaque switching, but not opaque-to-white switching; greater expression in white cells than opaque cells; has conserved deacetylation motif; inhibited by trichostatin-A
orf19.2607	orf19.2607	0.00452067	0.471786	0.00910173	0.0834144	-0.00188646	0.797451	0.00124972	0.884976	Predicted ORF in Assemblies 19, 20 and 21
orf19.2608	ADH5	0.00763501	0.218893	0.00255299	0.772612	0.00428475	0.254667	0.00849351	0.0546179	Putative alcohol dehydrogenase; soluble protein in hyphae; expression is regulated upon white-opaque switching; fluconazole-induced; antigenic during murine systemic infection; regulated by Nrg1p, Tup1p; macrophage-downregulated protein
orf19.2609	CET1	-0.0085412	0.133808	-0.000485448	0.94661	-0.00213842	0.760687	0.000741491	0.78963	mRNA 5'-triphosphatase; large subunit of mRNA capping enzyme; positively regulates Ceg1p activity; functional homolog of S. cerevisiae Cet1p; Cet1p and Cgt1p form a 2:1 complex
orf19.2611	MCM6	0.00117747	0.768763	-0.0180668	0.414853	0.0114445	0.354062	-0.00562586	0.76654	Protein described as part of MCM DNA replication initiation complex; mRNA expression, peak at cell-cycle M/G1 phase; regulated by tyrosol and cell density; repressed in response to alpha pheromone in SpiderM medium
orf19.2613	ECM4	-0.0434748	0.409118	-0.045473	0.467772	-0.0417292	0.450487	-0.0343151	0.662299	Protein similar to S. cerevisiae Ecm4p; transcription is regulated by Nrg1p and Tup1p; induced in core stress response or in cyr1 or ras1 homozygous null mutant (yeast-form or hyphal cells); transposon mutation affects filamentous growth
orf19.2614	RSR1	-0.000401319	0.976402	-0.041309	0.0849873	0.00206747	0.788918	-0.00414753	0.742906	RAS-related protein; GTP/GDP cycling required for wild-type polar bud site selection, hyphal growth guidance; role in systemic virulence in mouse; geranylgeranylation predicted; suppresses S. cerevisiae cdc24-4 mutant heat sensitivity
orf19.2615	MDL1	0.00231485	0.600457	0.00682558	0.185559	-0.00182802	0.650515	0.0107893	0.0807204	Putative mitochondrial, half-size MDR-subfamily ABC transporter
orf19.2616	UGT51C1	0.00732994	0.162436	0.00467105	0.356779	0.00355899	0.513302	0.00513197	0.477122	UDP-glucose:sterol glucosyltransferase; enzyme of sterol glucoside (membrane-bound lipid) biosynthesis; has UDP-sugar binding domain; activity is UDP-glucose-specific in vitro; enzyme does not use UDP-mannose; Mig1p-regulated gene
orf19.2618	MET2	-0.0116715	0.634287	-0.0307954	0.179581	-0.0116726	0.303479	-0.0558526	0.130045	Putative homoserine acetyltransferase; Gcn4p-regulated; macrophage/pseudohyphal-repressed; not greatly biofilm induced, in contrast to many sulfur amino acid metabolic genes; no human or murine homolog; virulence-group-correlated expression
orf19.2619	PHO113	0.00467341	0.431486	0.000825966	0.885372	0.00586519	0.141244	0.00248212	0.419995	Protein described as a constitutive acid phosphatase; transcription is negatively regulated by Rim101p; DTT-extractable; N-glycosylated
orf19.2621	orf19.2621	-0.00702862	0.385908	0.00496585	0.5852	0.00262126	0.593373	-0.00229487	0.473584	Predicted ORF in Assemblies 19, 20 and 21
orf19.2622	YPT31	-0.00576369	0.530408	-0.00596703	0.68761	-0.00504762	0.536268	-0.000969642	0.948342	Predicted ORF in Assemblies 19, 20 and 21 (see Locus History Note for Assembly 19 correction); mutation confers hypersensitivity to toxic ergosterol analog
orf19.2623	ECM22	0.0196784	0.0831718	0.00955201	0.570359	0.0141354	0.0932015	0.0157492	0.523094	Putative transcription factor with zinc cluster DNA-binding motif
orf19.2629	orf19.2629	0.0107313	0.167858	-0.000756737	0.952607	0.00240364	0.864341	0.00431873	0.643844	Predicted ORF in Assemblies 19, 20 and 21
orf19.263.1	orf19.263.1	-0.00804168	0.290728	0.000301188	0.97848	-0.00719092	0.300089	-0.0119902	0.193401	Predicted ORF in Assembly 20 and 21; gene has intron
orf19.2630	RAD59	0.00175017	0.465537	0.00438247	0.161871	0.00134599	0.52141	0.00323826	0.274013	Protein similar to S. cerevisiae Rad59p; N-terminal similarity with Rad52p
orf19.2633	HGT14	0.00440943	0.413932	0.000207311	0.984388	0.00609643	0.157112	0.0109382	0.0837869	Putative glucose transporter of the major facilitator superfamily; the C. albicans glucose transporter family comprises 20 members; 12 probable membrane-spanning segments; expressed in rich medium with 2% glucose
orf19.2638	orf19.2638	0.00183024	0.751221	-0.00796559	0.682193	0.00390035	0.483776	-0.0165731	0.225276	Predicted ORF in Assemblies 19, 20 and 21
orf19.2639	orf19.2639	0.0103342	0.0936435	0.001825	0.676244	0.00135089	0.82807	0.00320896	0.228402	Predicted ORF in Assemblies 19, 20 and 21
orf19.2639.1	orf19.2639.1	0.00287275	0.340304	0.00232772	0.705257	-0.000151687	0.960819	0.00521081	0.62739	ORF Predicted by Annotation Working Group
orf19.2640	FUR1	-0.0137879	0.299657	0.00344201	0.946711	-0.0117475	0.271634	-0.0388415	0.00805488	Uracil phosphoribosyltransferase; enzyme of pyrimidine salvage; predicted tetrameric enzyme; mutations are associated with resistance to flucytosine (5-FC) in clinical isolates (clade I); macrophage-induced protein; flucytosine induced
orf19.2642	orf19.2642	0.00109781	0.885436	0.00394235	0.6367	-0.0024018	0.792062	0.0036824	0.732049	Predicted ORF in Assemblies 19, 20 and 21
orf19.2643	orf19.2643	0.0059034	0.262579	0.00129299	0.818829	0.00614325	0.169782	0.0127354	0.094278	Putative protein of unknown function; heterozygous null mutant exhibits resistance to parnafungin in the C. albicans fitness test; predicted ORF in Assemblies 19, 20 and 21
orf19.2644	QCR2	0.0162545	0.0198105	0.00523534	0.791433	-0.00643892	0.721443	-0.0126669	0.414684	Protein described as ubiquinol-cytochrome-c reductase; antigenic in human; transcriptionally induced by interaction with macrophage; repressed by nitric oxide; in detergent-resistant membrane fraction (possible lipid raft component)
orf19.2646	ZCF13	-0.00203234	0.396163	0.000614328	0.906647	-0.00330606	0.286905	-0.000400614	0.905556	Predicted zinc-finger protein of unknown function, not essential for viability
orf19.2649	PCL1	0.00061883	0.950837	0.00707699	0.40669	0.00367726	0.558325	0.00753069	0.075506	Cyclin homolog; expression induced upon filamentous growth; transcription is induced in response to alpha pheromone in SpiderM medium
orf19.2650	orf19.2650	0.00189544	0.48215	0.00037637	0.941871	0.00324126	0.38183	0.00527985	0.0122437	Predicted ORF in Assemblies 19, 20 and 21
orf19.2651	CAM1-1	-0.00379024	0.549951	-0.0137869	0.621613	0.00231946	0.7359	-0.0111813	0.29551	Putative translation elongation factor; genes encoding ribosomal subunits, translation factors, and tRNA synthetases are downregulated upon phagocytosis by murine macrophage
orf19.2653	orf19.2653	0.00496358	0.16396	0.00050808	0.926824	-0.0122856	0.578311	-0.00363557	0.581118	Protein not essential for viability
orf19.2654	RMS1	0.00855599	0.263194	0.0116834	0.466184	0.016794	0.0307224	0.0084176	0.477927	Protein induced during the mating process
orf19.2655	BUB3	0.00664512	0.122998	0.00388298	0.713123	0.00464178	0.133207	0.00538029	0.204562	Protein similar to S. cerevisiae Bub3p, which is a kinetochore checkpoint component; induced under hydroxyurea treatment
orf19.2660	EAF3	-0.00317051	0.653166	-0.00603639	0.608961	0.00483645	0.536498	-0.0102307	0.630909	Subunit of the NuA4 histone acetyltransferase complex
orf19.2661	TLO34	-0.00480372	0.483539	0.00880935	0.150708	0.0024085	0.262543	0.00424741	0.651544	Non-telomeric member of a family of telomere-proximal genes of unknown function; predicted N-terminus is extended, relative to that of other family members
orf19.2663	orf19.2663	-0.00956411	0.489645	-0.00517622	0.800976	-8.82178e-05	0.991648	-0.00424669	0.802597	Predicted ORF in Assemblies 19, 20 and 21
orf19.2664	orf19.2664	-0.00213064	0.711909	-0.00413858	0.759537	0.00688788	0.321559	0.00743815	0.388326	Predicted ORF in Assemblies 19, 20 and 21
orf19.2665	MSN5	0.00391539	0.360591	0.000543511	0.957026	0.00547999	0.458874	0.00365977	0.581118	Predicted ORF in Assemblies 19, 20 and 21
orf19.2667	RPF1	0.0101429	0.102522	0.000210572	0.969477	0.00731042	0.360473	0.0102118	0.093696	Predicted ORF in Assemblies 19, 20 and 21; essential for growth
orf19.267	orf19.267	0.00347863	0.760938	-0.00375079	0.846086	0.00546343	0.648533	0.0118399	0.343969	Predicted ORF in Assemblies 19, 20 and 21
orf19.2670	orf19.2670	-0.0377766	0.0734807	-0.00889871	0.528294	-0.0185831	0.251929	-0.0587259	0.0259639	Predicted ORF in Assemblies 19, 20 and 21
orf19.2671	orf19.2671	-0.00123196	0.779992	-0.00131752	0.897328	0.0015644	0.861846	0.0103503	0.145734	Predicted ORF in Assemblies 19, 20 and 21; Plc1p-regulated
orf19.2672	NCP1	0.00409167	0.297467	0.00176873	0.528294	0.00136036	0.666645	0.00192802	0.565329	NADPH-cytochrome P450 reductase, acts with Erg11p in sterol 14 alpha-demethylation in ergosterol biosynthesis; subject to hypoxic regulation; ketoconazole-induced; caspofungin repressed
orf19.2672	NCP1	0.00365137	0.204945	0.0022883	0.498708	0.0038035	0.368882	0.00319403	0.512165	NADPH-cytochrome P450 reductase, acts with Erg11p in sterol 14 alpha-demethylation in ergosterol biosynthesis; subject to hypoxic regulation; ketoconazole-induced; caspofungin repressed
orf19.2672	NCP1	-0.000280221	0.970592	0.0166327	0.0232259	0.00992807	0.0725216	0.00470039	0.3989	NADPH-cytochrome P450 reductase, acts with Erg11p in sterol 14 alpha-demethylation in ergosterol biosynthesis; subject to hypoxic regulation; ketoconazole-induced; caspofungin repressed
orf19.2673	orf19.2673	0.00262488	0.306385	0.0026352	0.226118	0.00295887	0.197568	-0.000889782	0.626229	Predicted ORF in Assemblies 19, 20 and 21
orf19.2674	orf19.2674	-0.00183812	0.744676	-0.00381451	0.626239	-0.00617138	0.637136	-0.00452739	0.506465	Putative transcription factor with zinc finger DNA-binding motif; possibly spurious ORF (Annotation Working Group prediction)
orf19.268	orf19.268	0.0150785	0.13375	0.0215575	0.100266	-0.0120708	0.226751	0.0107153	0.0579125	Predicted ORF in Assemblies 19, 20 and 21
orf19.2680	orf19.2680	-0.00678252	0.146324	0.00260892	0.703378	0.000906899	0.854141	0.00713662	0.271088	Predicted ORF in Assemblies 19, 20 and 21
orf19.2682	orf19.2682	-5.72236e-05	0.995948	0.00239124	0.842184	0.00576808	0.333273	0.0105428	0.343686	Predicted ORF in Assemblies 19, 20 and 21
orf19.2684	orf19.2684	-0.0454005	0.132434	-0.0859525	0.0541861	-0.101631	0.013025	-0.0813918	0.160821	Predicted ORF in Assemblies 19, 20 and 21
orf19.2685	PGA54	0.000432314	0.946183	-0.00130261	0.8827	0.00142332	0.75098	-0.00463374	0.518635	Putative GPI-anchored protein; hyphal induced; Hog1p-downregulated; induced in a cyr1 or efg1 homozygous null mutant; shows colony morphology-related gene regulation by Ssn6p; upregulated in an RHE model
orf19.2686	orf19.2686	0.0075147	0.00570842	-0.00264728	0.785516	0.000306489	0.936293	-0.000115788	0.979369	Predicted ORF in Assemblies 19, 20 and 21
orf19.2687.1	orf19.2687.1	0.00730505	0.130088	0.00153666	0.923083	0.00508136	0.526938	-0.0105817	0.266354	ORF Predicted by Annotation Working Group
orf19.2688	NAN1	0.00171024	0.750674	0.00948525	0.1464	-0.000741481	0.933571	0.000565042	0.961798	Predicted ORF in Assemblies 19, 20 and 21; physically interacts with TAP-tagged Nop1p
orf19.269	SES1	0.0129105	0.132391	0.00563315	0.715336	0.0146422	0.0666128	0.0102855	0.311635	Seryl-tRNA synthetase; charges the tRNA that recognizes the CUG codon, which typically specifies Leu, but specifies Ser in C. albicans; complements S. cerevisiae ses1 mutant viability; soluble protein in hyphae; macrophage-regulated
orf19.2690	orf19.2690	-0.00195686	0.747873	0.00821458	0.273215	0.00350127	0.614528	0.010691	0.512223	Predicted ORF in Assemblies 19, 20 and 21
orf19.2694	TYS1	-0.00419614	0.527191	0.00126857	0.926552	-0.00177335	0.802401	0.00447673	0.713779	Putative tRNA-Tyr synthetase; genes encoding ribosomal subunits, translation factors, and tRNA synthetases are downregulated upon phagocytosis by murine macrophage; protein detected by mass spec in stationary phase cultures
orf19.2695	UBR1	-0.00553564	0.423444	2.4973e-05	0.997327	0.00235743	0.706658	0.000866113	0.876035	Protein similar to S. cerevisiae Ubr1p ubiquitin-protein ligase; transposon mutation affects filamentous growth
orf19.2699	ABP1	0.00231762	0.291885	0.0032646	0.231726	-0.00167917	0.454446	0.00232392	0.517048	Protein similar to S. cerevisiae Abp1p, which is an actin-binding protein of the cortical actin cytoskeleton; caspofungin induced; protein detected by mass spec in stationary phase cultures
orf19.270	orf19.270	0.0125307	0.0859371	0.013671	0.143026	0.0100568	0.304379	0.0113094	0.0892732	Predicted ORF in Assemblies 19, 20 and 21
orf19.2701	orf19.2701	0.00387093	0.563187	0.00195228	0.578414	-0.0157495	0.400507	0.00178891	0.488639	Predicted ORF in Assemblies 19, 20 and 21; greater mRNA abundance observed in a cyr1 or ras1 homozygous null mutant than in wild type
orf19.2703	orf19.2703	0.00282389	0.857576	-0.00986769	0.846102	0.000867547	0.955069	-0.00297639	0.818687	Transcriptionally regulated by iron; expression greater in low iron; increased expression observed in an ssr1 homozygous null mutant; similar to S. cerevisiae Ymr171cp; fungal-specific (no human or murine homolog)
orf19.2707.1	QCR9	0.0193852	0.177261	-0.0125589	0.77486	0.0118967	0.193993	-0.0304037	0.397299	ORF Predicted by Annotation Working Group; shows colony morphology-related gene regulation by Ssn6p
orf19.2708	orf19.2708	0.00673571	0.430491	0.0035496	0.869198	0.0101816	0.0566608	0.0119729	0.267801	Predicted ORF in Assemblies 19, 20 and 21; nonessential
orf19.2709	ZUO1	-0.00132813	0.907623	-0.0100115	0.177242	0.00161794	0.801419	-0.000671451	0.904462	Protein likely to be essential for growth, based on an insertional mutagenesis strategy; similar to S. cerevisiae Zuo1p, which is a cytosolic ribosome-associated chaperone
orf19.2710	orf19.2710	0.00295543	0.519879	0.00644735	0.312716	0.00373894	0.435248	0.00537017	0.362017	Predicted ORF in Assemblies 19, 20 and 21
orf19.2711	orf19.2711	-0.00118347	0.688529	-0.000596985	0.934463	-0.00101428	0.786155	-0.00623922	0.421353	Predicted ORF in Assemblies 19, 20 and 21; downregulated in core stress response
orf19.2711.1	orf19.2711.1	-0.0161309	0.132434	0.00517593	0.481227	-0.0132459	0.093721	-0.0168294	0.0807204	ORF Predicted by Annotation Working Group
orf19.2712	HCA4	0.00102743	0.907623	0.00372758	0.525481	0.00440401	0.549657	0.000337097	0.970962	Putative role in regulation of biogenesis of the cell wall; upregulated in biofilm
orf19.2713	orf19.2713	-0.203336	0.214813	-0.165485	0.00926589	-0.23097	0.0107892	-0.25067	0.00232365	Predicted ORF in Assemblies 19, 20 and 21
orf19.2715	RPC53	-0.000862173	0.921439	-0.00163247	0.855637	0.0026053	0.82895	0.00401291	0.548998	Predicted ORF in Assemblies 19, 20 and 21
orf19.2717	SAS10	0.0010195	0.907623	0.00974229	0.164761	0.0106507	0.0798335	0.0103091	0.0212449	Predicted ORF in Assemblies 19, 20 and 21; mutation confers resistance to 5-fluorocytosine (5-FC); repressed upon high-level peroxide stress
orf19.272	FAA21	-0.05778	0.0285233	-0.0870816	0.0157022	-0.149511	0.026199	-0.152694	0.069441	Predicted acyl CoA synthetase; upregulated upon phagocytosis; transcription is regulated by Nrg1p and Mig1p
orf19.2720	orf19.2720	0.00681465	0.166836	-0.0150589	0.0544364	0.00115626	0.840389	-0.0276498	0.0157491	Predicted ORF in Assemblies 19, 20 and 21
orf19.2721	orf19.2721	0.00044392	0.932068	0.00351867	0.762736	0.00382171	0.666645	0.00309836	0.770406	Predicted ORF in Assemblies 19, 20 and 21
orf19.2722	CGR1	-1.70148e-05	0.998143	0.000775052	0.966531	-0.00404328	0.44149	0.00113841	0.876035	Possible negative regulator of yeast-form growth; induced upon growth cessation at yeast-hyphal transition or during planktonic growth; physically interacts with Msi3p, an HSP70 family member; similar to rat anti-aging gene, SMP30
orf19.2724	orf19.2724	0.00131709	0.77189	0.0056817	0.150319	-0.00579044	0.207066	0.00357446	0.109951	Predicted ORF in Assemblies 19, 20 and 21
orf19.2725	orf19.2725	0.00393753	0.420994	0.00193245	0.801435	0.0112507	0.054866	-0.00303876	0.73967	Predicted ORF in Assemblies 19, 20 and 21
orf19.2726	orf19.2726	-0.00191547	0.793298	-0.00102529	0.919192	-0.00280408	0.593708	0.00683112	0.462086	Predicted ORF in Assemblies 19, 20 and 21; Plc1p-regulated
orf19.2727	GRX3	0.00957779	0.132434	0.00411045	0.35464	0.00335545	0.197568	0.00502975	0.094166	Protein described as glutaredoxin; flucytosine induced; regulated by Gcn4p; repressed in response to amino acid starvation (3-aminotriazole treatment)
orf19.2728	orf19.2728	-0.00646949	0.541315	0.00923236	0.628822	-0.00741422	0.424147	0.00343584	0.777676	Predicted ORF in Assemblies 19, 20 and 21
orf19.2730	orf19.2730	0.00595344	0.140617	0.0148682	0.0923476	0.0116597	0.104563	0.00580051	0.475081	Predicted ORF in Assemblies 19, 20 and 21
orf19.2733	orf19.2733	0.0014506	0.825984	0.00643127	0.747977	-0.00191607	0.62673	-0.00335123	0.584036	Putative protein of unknown function, transcription is activated in the presence of elevated CO2; predicted ORF in Assemblies 19, 20 and 21
orf19.2734	orf19.2734	0.0018779	0.619301	-0.00069639	0.936798	-0.00404573	0.492704	-0.00359859	0.311917	Protein not essential for viability
orf19.2735	SEN2	0.00115094	0.871485	0.00132223	0.795629	0.00111599	0.871593	0.000425559	0.948996	Predicted ORF in Assemblies 19, 20 and 21; mutation confers hypersensitivity to toxic ergosterol analog, and to amphotericin B; has intron in 5'-UTR
orf19.2736	orf19.2736	0.00610921	0.00927481	0.0115297	0.0295215	-0.0125059	0.150705	-0.00870288	0.358713	Predicted ORF in Assemblies 19, 20 and 21; flucytosine induced
orf19.2737	orf19.2737	0.0227796	0.194607	0.02573	0.419145	0.0167961	0.358391	0.00972975	0.815075	Predicted ORF in Assemblies 19, 20 and 21
orf19.2738	SUL2	0.0122604	0.298967	0.0132978	0.44623	0.0145983	0.135749	0.0158083	0.108829	Protein described as a sulfate transporter; transcription is negatively regulated by Sfu1p; induced upon biofilm formation; amphotericin B induced
orf19.2739	orf19.2739	-0.00220462	0.635664	-0.00325933	0.854633	-0.00645384	0.63503	-0.0124938	0.109951	Predicted ORF in Assemblies 19, 20 and 21
orf19.274	TFC4	0.00314446	0.671103	0.00455832	0.408466	0.00358113	0.392863	0.0025442	0.569808	Predicted ORF in Assemblies 19, 20 and 21; transcriptionally activated by Mnl1p under weak acid stress
orf19.2742	orf19.2742	-0.0232868	0.240065	-0.0179668	0.515383	-0.0376357	0.124392	-0.018354	0.243609	Predicted ORF in Assemblies 19, 20 and 21
orf19.2743	orf19.2743	0.00349383	0.484474	0.00379046	0.752488	-0.00751171	0.153866	-0.00717574	0.343874	Predicted ORF in Assemblies 19, 20 and 21
orf19.2745	UME7	0.00666094	0.185487	0.00550388	0.213783	0.00695484	0.163559	0.00454961	0.40393	Putative transcription factor with zinc cluster DNA-binding motif; similar to S. cerevisiae Ume6p, which is a transcription factor involved in the regulation of meiotic genes
orf19.2746	orf19.2746	-0.00216164	0.664092	-0.00119177	0.940525	0.00232699	0.579985	0.00406868	0.415707	Predicted ORF in Assemblies 19, 20 and 21
orf19.2747	RGT1	0.00217788	0.385986	5.10437e-05	0.992538	0.0021703	0.614528	0.00105183	0.665684	Transcriptional repressor involved in the regulation of glucose transporter genes; has zinc-cluster; similar to S. cerevisiae Rgt1p
orf19.2748	ARG83	0.00542131	0.161156	0.00306912	0.690505	-0.00101432	0.895993	0.00324686	0.416193	Predicted zinc-finger protein of unknown function; clade-associated gene expression; similarity to S. cerevisiae Arg81p, which is a transcription factor involved in the regulation of arginine-responsive genes
orf19.2749	orf19.2749	0.00406839	0.311389	0.00411361	0.726637	0.00112782	0.702372	0.00643066	0.298572	Predicted ORF in Assemblies 19, 20 and 21; transcriptionally activated by Mnl1p under weak acid stress
orf19.275	orf19.275	-0.0247074	0.298364	-0.0200166	0.368877	-0.00211415	0.79606	-0.00685025	0.605487	Predicted ORF in Assemblies 19, 20 and 21
orf19.2754	orf19.2754	0.0039183	0.379486	0.00289537	0.532377	-0.00280521	0.483156	0.000111528	0.983748	Predicted ORF in Assemblies 19, 20 and 21
orf19.2758	PGA38	-0.00980659	0.423081	0.00713156	0.210185	-0.00259116	0.856807	-0.000402536	0.940715	Putative GPI-anchored protein of unknown function; repressed during cell wall regeneration
orf19.2760	orf19.2760	0.0117891	0.0928915	0.0108245	0.610382	-0.00191746	0.831982	0.00304744	0.703729	Putative protein of unknown function; heterozygous null mutant exhibits hypersensitivity to parnafungin and cordycepin in the C. albicans fitness test; predicted ORF in Assemblies 19, 20 and 21
orf19.2761	orf19.2761	-0.00220715	0.6746	0.00655012	0.150708	-0.00105522	0.787198	0.00296885	0.482196	Predicted ORF in Assemblies 19, 20 and 21; induced by nitric oxide in yhb1 mutant; possibly spurious ORF (Annotation Working Group prediction)
orf19.2762	AHP1	-0.00772728	0.311312	-0.00606361	0.206944	-0.00884558	0.114192	-0.0117403	0.0648452	Putative alkyl hydroperoxide reductase; immunogenic in mouse; biofilm-induced; fluconazole-induced; amphotericin B, caspofungin, alkaline downregulated; induced in core stress response; regulated by Ssk1p, Nrg1p, Tup1p, Ssn6p, Hog1p
orf19.2763	orf19.2763	0.00291972	0.671917	0.00202955	0.88638	-0.00182548	0.50089	-0.00160683	0.756932	Protein not essential for viability; orf19.10279 possibly transcriptionally regulated upon hyphal formation
orf19.2766	orf19.2766	-0.000909688	0.76799	0.000798614	0.932361	-0.00388867	0.331073	0.00028205	0.97923	Predicted ORF in Assemblies 19, 20 and 21
orf19.2768	AMS1	0.00144003	0.856811	0.00407557	0.700933	0.00730188	0.321203	0.0045158	0.550111	Putative alpha-mannosidase; transcription is regulated by Nrg1p; induced during cell wall regeneration
orf19.2769	orf19.2769	0.000231794	0.965222	0.00909048	0.137132	0.00206289	0.845756	-0.00718768	0.358003	Predicted ORF in Assemblies 19, 20 and 21; hyphal-induced expression; greater mRNA abundance observed in a cyr1 or ras1 homozygous null mutant than in wild type
orf19.2770	orf19.2770	0.00412282	0.66181	-0.00872401	0.577943	-0.0118166	0.15125	-0.000177362	0.982066	Predicted ORF in Assemblies 19, 20 and 21
orf19.2770.1	SOD1	-0.00280992	0.597214	0.00793928	0.1464	0.00157271	0.715697	0.005744	0.343969	Cytosolic copper- and zinc-containing superoxide dismutase, involved in protection from oxidative stress and required for full virulence; alkaline upregulated by Rim101p; upregulated in the presence of human blood
orf19.2772	HOS3	0.00817018	0.348298	0.00459771	0.757061	0.0105793	0.12363	-0.00250158	0.824651	Histone deacetylase; similar to S. cerevisiae Hos3p; greater expression and longer mRNA in white cells, compared to opaque cells; has conserved deacetylation motif
orf19.2775	IDI1	0.00214324	0.676732	0.00478438	0.321887	0.00827329	0.153896	0.00490934	0.468939	Predicted ORF in Assemblies 19, 20 and 21
orf19.2778	orf19.2778	-0.00132206	0.893133	0.00295366	0.664992	-0.000975959	0.857462	-0.00791793	0.354663	Putative protein of unknown function, transcription is upregulated in clinical isolates from HIV+ patients with oral candidiasis; predicted ORF in Assemblies 19, 20 and 21
orf19.2779	orf19.2779	-0.00213174	0.691657	2.56933e-05	0.995713	-5.25976e-05	0.989645	0.00283321	0.506465	Predicted ORF in Assemblies 19, 20 and 21
orf19.2781	orf19.2781	-0.0354365	0.0162859	0.000479377	0.969662	-0.0192299	0.223281	-0.0318425	0.164727	Predicted ORF in Assemblies 19, 20 and 21
orf19.2782	orf19.2782	0.00237342	0.568861	0.00172457	0.773083	-0.000823768	0.895598	0.00369139	0.677677	Predicted ORF in Assemblies 19, 20 and 21
orf19.2786	orf19.2786	0.00225305	0.50352	-0.00026445	0.926552	0.00138358	0.483181	-0.00410503	0.140653	Predicted ORF in Assemblies 19, 20 and 21
orf19.2787	PRY1	0.00155563	0.692785	0.00473163	0.333576	0.00416979	0.199857	0.00564391	0.182246	Transcription is opaque specific; transcription is repressed in response to alpha pheromone in SpiderM medium
orf19.279	orf19.279	0.00601805	0.218693	0.00177406	0.873128	0.00805519	0.347203	0.010147	0.11288	Predicted ORF in Assemblies 19, 20 and 21
orf19.2790	SWD2	0.00967417	0.124311	0.0109397	0.184488	0.0084619	0.231699	0.0033027	0.722428	Predicted ORF in Assemblies 19, 20 and 21
orf19.2791	orf19.2791	0.0175451	0.0554654	0.0242076	0.464652	0.0169183	0.285851	0.00376777	0.875057	Predicted ORF in Assemblies 19, 20 and 21
orf19.2792	IST2	0.0055828	0.334374	0.00658712	0.391386	0.00291642	0.589043	0.00711798	0.169886	Predicted ORF in Assemblies 19, 20 and 21
orf19.2796	orf19.2796	0.00565983	0.556426	-0.000360593	0.983956	-0.00218566	0.804882	0.0116725	0.023304	Predicted ORF in Assemblies 19, 20 and 21
orf19.2797	orf19.2797	-0.0145845	0.108964	0.00231293	0.952607	-0.0121155	0.485836	-0.0265718	0.125628	Predicted ORF in Assemblies 19, 20 and 21
orf19.2798	orf19.2798	0.0187223	0.027422	-0.0322937	0.0544364	-0.00863982	0.467792	0.00286018	0.8447	Putative helicase; fungal-specific (no human or murine homolog)
orf19.2799	GPI8	0.0039342	0.292411	0.00574399	0.248694	0.00668476	0.0351949	0.00682263	0.353684	Protein likely to be essential for growth, based on an insertional mutagenesis strategy; similar to S. cerevisiae Gpi8p, which is a subunit of the GPI transamidase complex that adds GPI anchors to proteins
orf19.280	orf19.280	-0.00283826	0.46551	0.00325993	0.803088	0.000797767	0.884599	-0.000582781	0.963416	Predicted ORF in Assemblies 19, 20 and 21; possibly spurious ORF (Annotation Working Group prediction)
orf19.2803	HEM13	0.0045198	0.105833	0.00182201	0.737942	0.00188174	0.41477	-0.00191409	0.435504	Coproporphyrinogen III oxidase; antigenic in human, mouse; localizes to yeast-form cell surface, not hyphae; soluble in hyphae; iron-regulated expression; macrophage-downregulated protein; not Rfg1p regulated, farnesol-induced
orf19.2804	orf19.2804	0.00521616	0.279634	0.00498075	0.346952	0.00504332	0.217482	0.000564508	0.965638	Predicted ORF in Assemblies 19, 20 and 21
orf19.2805	orf19.2805	0.00911316	0.414761	0.019067	0.0544364	0.00563142	0.398249	-0.00593998	0.626229	Predicted ORF in Assemblies 19, 20 and 21; expression regulated during planktonic growth
orf19.2808	ZCF16	-0.184859	0.121866	-0.187205	0.150202	-0.202861	0.0925359	-0.198371	0.0895112	Predicted zinc-finger protein of unknown function, not essential for viability
orf19.2809	CTN3	-0.0140216	0.46551	-0.0246746	0.541341	-0.00535726	0.809336	-0.00464546	0.746493	Predicted peroxisomal carnitine acetyl transferase; Ura+ deletion strain has no obvious metabolic, hyphal, or virulence defects; transcription induced by macrophage engulfment, hyphal growth, starvation, or nonfermentable carbon sources
orf19.2810	AAP1	-0.00168515	0.774935	0.00113931	0.905654	0.00243783	0.424147	0.00702596	0.487086	Putative amino acid permease; fungal-specific (no human or murine homolog)
orf19.2813	orf19.2813	-0.011791	0.237069	0.0129656	0.255612	-0.0112601	0.0727939	-0.0138255	0.0952276	Predicted ORF in Assemblies 19, 20 and 21
orf19.2818	orf19.2818	-0.0108089	0.295987	-0.0113224	0.331879	0.00430703	0.430965	-0.00760331	0.617773	Predicted ORF in Assemblies 19, 20 and 21
orf19.2819	orf19.2819	0.000420971	0.938724	-0.00100134	0.886154	0.000788778	0.868579	0.00683228	0.483243	Predicted ORF in Assemblies 19, 20 and 21; possibly spurious ORF (Annotation Working Group prediction)
orf19.2820	orf19.2820	0.00858552	0.332561	0.00793309	0.344141	0.00446638	0.324101	-0.000368585	0.975692	Predicted ORF in Assemblies 19, 20 and 21
orf19.2821	orf19.2821	0.015497	0.154353	-0.0206325	0.23202	0.000111373	0.991648	-0.00234314	0.934853	Predicted ORF in Assemblies 19, 20 and 21; repressed by nitric oxide
orf19.2822	orf19.2822	0.00439428	0.78055	0.000796813	0.970456	0.00336846	0.637136	0.00731004	0.272953	Predicted ORF in Assemblies 19, 20 and 21; possibly spurious ORF (Annotation Working Group prediction)
orf19.2823	RFG1	-0.0035563	0.635056	-0.0069232	0.773083	-0.00305819	0.906678	-0.0124178	0.492294	Transcriptional regulator of filamentous growth and hyphal genes; acts in Tup1p-dependent and -independent pathways; binds DNA; has HMG domain; not transcriptionally regulated by oxygen or serum; not responsible for hypoxic repression
orf19.2825	orf19.2825	-0.00742537	0.423081	0.0033279	0.344906	-0.00463046	0.344626	-0.00410237	0.705084	Predicted ORF in Assemblies 19, 20 and 21; a-specific transcription
orf19.2827	orf19.2827	0.00249539	0.567171	0.00269571	0.631926	0.0015151	0.686125	0.00281665	0.406524	Predicted ORF in Assemblies 19, 20 and 21
orf19.2829	orf19.2829	0.00106906	0.907623	-0.00454597	0.70292	0.005987	0.232451	-0.00060928	0.933482	Predicted ORF in Assemblies 19, 20 and 21
orf19.2830	RRP9	0.00922993	0.11499	0.00163256	0.848028	0.00801191	0.0455362	0.00956275	0.0128606	Predicted ORF in Assemblies 19, 20 and 21; mutation confers resistance to 5-fluorocytosine (5-FC), 5-fluorouracil (5-FU), and tubercidin (7-deazaadenosine); physically interacts with TAP-tagged Nop1p
orf19.2831	RPC31	0.00429084	0.108252	0.000902744	0.889268	0.00160115	0.749271	0.00180202	0.689854	Predicted ORF in Assemblies 19, 20 and 21; repressed by nitric oxide; induced during infection of murine kidney, compared to growth in vitro; has murine homolog
orf19.2832	INN1	0.0010547	0.880869	0.00698648	0.391386	-0.00610944	0.721443	-0.0135039	0.105666	Protein with similarity to S. cerevisiae Inn1p, which is an essential protein of the contractile actomyosin ring required for ingression of the plasma membrane into the bud neck during cytokinesis; contains a C2 membrane targeting domain
orf19.2834	RPD3	0.00467288	0.327653	0.00616132	0.429792	0.00761106	0.0179631	0.00822561	0.110918	Histone deacetylase; regulates frequency of white-to-opaque and opaque-to-white switching; greater expression in white cells than opaque cells; has conserved deacetylation motif
orf19.2837	ALG5	0.00538796	0.130088	-0.00442142	0.646252	-0.00293033	0.560014	0.00271946	0.783759	Putative glucosyltransferase involved in cell wall mannan biosynthesis
orf19.2838	orf19.2838	0.00238319	0.621142	0.0032266	0.673285	0.00267702	0.761375	-0.00685289	0.430399	Predicted ORF in Assemblies 19, 20 and 21; mutation confers hypersensitivity to amphotericin B
orf19.2839	CIRT4B	0.00312959	0.610509	-0.000677856	0.952607	-0.0135071	0.087537	0.0011182	0.805771	Decreased transcription is observed in an azole-resistant strain that overexpresses CDR1 and CDR2
orf19.284	orf19.284	0.00091563	0.89726	0.000938568	0.936798	0.000866155	0.874475	-0.00109694	0.920302	Predicted ORF in Assemblies 19, 20 and 21
orf19.2841	PGM2	0.0148094	0.122998	0.00199357	0.869198	0.00861974	0.27419	0.0110849	0.338679	Protein not essential for viability; similar to S. cerevisiae Pgm2p, which is phosphoglucomutase
orf19.2844	orf19.2844	0.00885331	0.193899	0.00147647	0.765832	0.0033905	0.347263	-0.00693882	0.399544	Predicted ORF in Assemblies 19, 20 and 21; induced in core caspofungin response
orf19.2846	orf19.2846	-0.000495618	0.921439	-0.00103345	0.804945	0.00116236	0.730503	0.000523183	0.876035	Predicted ORF in Assemblies 19, 20 and 21; induced in core caspofungin response; transcription regulated upon yeast-hyphal switch
orf19.2847	orf19.2847	0.00240018	0.686862	0.00788749	0.309505	0.0026217	0.53688	0.00601986	0.497949	Predicted ORF in Assemblies 19, 20 and 21
orf19.2848	orf19.2848	0.0129126	0.0344331	0.00850025	0.34111	0.00481433	0.194261	0.00740646	0.155023	Predicted ORF in Assemblies 19, 20 and 21
orf19.2849	AQY1	-0.00376832	0.721678	0.00487317	0.740063	0.000311172	0.969623	-0.00111505	0.94403	Aquaporin water channel; mutant has increased resistance to osmotic shock; required for wild-type tolerance of freezing; not required for virulence in a mouse model of systemic infection; flucytosine repressed
orf19.2850	orf19.2850	-0.00250715	0.62212	-0.00486166	0.829431	0.000218914	0.964819	0.00468387	0.469047	Predicted ORF in Assemblies 19, 20 and 21; induced by nitric oxide in yhb1 mutant
orf19.2851	orf19.2851	-0.00725153	0.367163	0.00742688	0.109433	0.00461067	0.469484	0.000707568	0.926717	Predicted ORF in Assemblies 19, 20 and 21
orf19.2852	orf19.2852	-0.0046895	0.191032	0.00109124	0.91776	0.00127925	0.804878	0.00832398	0.436515	Predicted ORF in Assemblies 19, 20 and 21
orf19.286	orf19.286	-0.0408365	0.0743415	-0.0475215	0.0157022	-0.0364981	0.180828	-0.00620323	0.422056	Decreased transcription is observed upon fluphenazine treatment; possibly spurious ORF (Annotation Working Group prediction)
orf19.2863	orf19.2863	-0.00215541	0.758578	0.000307848	0.982759	-0.00487639	0.454442	0.000611557	0.974413	Predicted ORF in Assemblies 19, 20 and 21; possibly spurious ORF (Annotation Working Group prediction)
orf19.2866	orf19.2866	-0.00784308	0.225158	-0.00249089	0.719179	-0.0133818	0.0831067	-0.000871182	0.843362	Predicted ORF in Assemblies 19, 20 and 21
orf19.2867	orf19.2867	-0.00151081	0.92202	0.00196419	0.757061	0.000545494	0.904938	0.00334134	0.857027	Predicted ORF in Assemblies 19, 20 and 21
orf19.2868	orf19.2868	0.00787912	0.104787	0.00127228	0.926552	0.00443639	0.388332	0.006109	0.383317	Predicted ORF in Assemblies 19, 20 and 21; transcription is induced in response to alpha pheromone in SpiderM medium
orf19.2869	orf19.2869	-0.00746246	0.281316	0.00258483	0.899493	0.0100938	0.154503	-0.00851132	0.518635	Predicted ORF in Assemblies 19, 20 and 21; possibly spurious ORF (Annotation Working Group prediction)
orf19.2871	SDH12	0.00700395	0.29765	-0.00118649	0.923083	0.00890038	0.212079	0.00865431	0.225276	Protein with similarity to S. cerevisiae SDH1, which is a flavoprotein subunit of succinate dehydrogenase; soluble protein in hyphae; macrophage-downregulated protein level; downregulated by Efg1p; repressed by nitric oxide
orf19.2877	PDC11	0.00502506	0.0272357	0.00239391	0.555914	0.000258708	0.890516	-0.00418127	0.171327	Protein similar to pyruvate decarboxylase; antigenic; at hyphal cell surface, not yeast-form cells; soluble in hyphae; regulated by Gcn4p, Efg1p, Efh1p; fluconazole-, farnesol-, biofilm-induced; repressed upon amino acid starvation
orf19.2878	PGA15	0.00703572	0.130088	0.00669134	0.28149	0.00306655	0.300305	0.00166497	0.810624	Putative GPI-anchored protein of unknown function
orf19.2879	IFF5	7.49771e-05	0.995179	-0.00204176	0.936798	0.00301963	0.557133	0.0146212	0.0516801	Putative GPI-anchored protein of unknown function
orf19.2881	MNN4	0.00673098	0.347732	-0.0043215	0.798665	0.00260044	0.75683	-0.0151897	0.530866	Protein required for normal mannosylphosphorylation of oligosaccharides linked to cell wall proteins, not required for virulence or kidney colonization in mouse systemic infection or for normal interaction with macrophages
orf19.2882	XUT1	-0.00141655	0.760938	0.00639531	0.210185	0.000575733	0.871756	-0.00313649	0.274013	Putative high-affinity, high-capacity xanthine-uric acid/H+ symporter; similar to A. nidulans UapA; member of the Nucleobase-Ascorbate Transporter/Nucleobase-Cation Symporter (NAT/NCS2) family
orf19.2883	CSO99	0.0052312	0.392591	-0.00198775	0.886154	0.00612658	0.16521	0.0132915	0.0420496	Protein of unknown function, not conserved in S. cerevisiae
orf19.2884	CDC68	-0.00262627	0.629169	-0.00489012	0.491767	-0.00403827	0.595237	0.00120786	0.925887	Functional homolog of S. cerevisiae Cdc68p, which is a transcription elongation factor; essential; possible drug target
orf19.2886	CEK1	0.000608146	0.929673	-0.0046785	0.682193	0.00539917	0.104064	0.00767552	0.328148	ERK-family protein kinase, required for wild-type yeast-hyphal switching, mating efficiency, and virulence in a mouse model; Cst20p-Hst7p-Cek1p-Cph1p MAPK pathway regulates mating, and invasive hyphal growth under some conditions
orf19.2887	MET13	0.0023972	0.612682	-0.00363515	0.518425	-0.00427342	0.163559	0.00598272	0.0833176	Predicted ORF in Assemblies 19, 20 and 21; ketoconazole-induced; amphotericin B repressed
orf19.2892	orf19.2892	0.0106995	0.273357	-0.000713908	0.97848	0.00747609	0.191223	-0.00967978	0.625815	Predicted ORF in Assemblies 19, 20 and 21
orf19.2897	SOU2	-0.00310361	0.145897	0.00317667	0.411785	-0.0029593	0.513826	-0.00111755	0.776307	Protein similar to Sou1p; not required for utilization of L-sorbose
orf19.290	KRE5	0.00311492	0.691438	0.00389772	0.752332	-0.00230024	0.800537	0.00623407	0.525244	Predicted UDP-glucose:glycoprotein glucosyltransferase; required for wild-type 1,6-beta-D-glucan biosynthesis, hyphal growth, and virulence in mouse IV infection; production in S. cerevisiae partially complements defects of a kre5 mutant
orf19.2909	ERG26	0.00460526	0.181052	0.00204737	0.899972	0.00357831	0.591233	-0.000234263	0.975692	C-3 sterol dehydrogenase, catalyzes the second of three steps required to remove two C-4 methyl groups from an intermediate in ergosterol biosynthesis; amphotericin B, caspofungin repressed
orf19.291	orf19.291	-0.00679802	0.601615	0.00605874	0.656809	0.00616229	0.232627	0.00755244	0.22763	Predicted ORF in Assemblies 19, 20 and 21
orf19.2914	orf19.2914	0.0119411	0.0554654	0.00843165	0.473669	0.00835338	0.248025	-0.00121251	0.905556	Predicted ORF in Assemblies 19, 20 and 21; possibly spurious ORF (Annotation Working Group prediction)
orf19.2916	orf19.2916	0.00258486	0.524547	0.000828353	0.815697	0.00387896	0.641762	0.000573728	0.880387	Predicted ORF in Assemblies 19, 20 and 21
orf19.292	orf19.292	-0.0118134	0.261489	0.00585323	0.607539	0.00158203	0.734862	-0.00490386	0.408708	Predicted ORF in Assemblies 19, 20 and 21
orf19.2921	orf19.2921	0.00252142	0.513417	0.00214947	0.598754	0.000864407	0.410718	0.00223317	0.286376	Predicted ORF in Assemblies 19, 20 and 21
orf19.2922	orf19.2922	0.00158858	0.851602	0.00356975	0.322916	0.010623	0.12107	0.00594127	0.0764627	Predicted ORF in Assemblies 19, 20 and 21
orf19.2923	orf19.2923	-0.0010262	0.852999	0.00670794	0.142995	0.00200482	0.731488	0.0101863	0.0907038	Predicted membrane transporter, member of the drug:proton antiporter (14 spanner) (DHA2) family, major facilitator superfamily (MFS); transcription is induced in response to alpha pheromone in SpiderM medium
orf19.2926	orf19.2926	-0.00769347	0.378211	-0.00811283	0.525481	-0.00856892	0.473882	-0.00517642	0.700899	Predicted ORF in Assemblies 19, 20 and 21
orf19.2927	MNN11	0.00116449	0.841754	0.000858764	0.914349	0.00603388	0.231699	0.00590324	0.427251	Protein with similarity to mannosyltransferases
orf19.2929	GSC1	0.00834293	0.40524	0.00604301	0.721479	0.015379	0.104168	0.0115555	0.100611	Subunit of beta-1,3-glucan synthase; essential; gsc1 allele determines resistance/sensitivity to echinocandin antifungals; 16 predicted membrane-spanning regions; mRNA abundance declines after yeast-to-hyphal transition; fungal-specific
orf19.2930	orf19.2930	0.00533505	0.266996	-0.00398631	0.729376	-0.00101685	0.910835	0.00177937	0.850275	Predicted ORF in Assemblies 19, 20 and 21
orf19.2933	orf19.2933	0.00234072	0.604196	0.00557569	0.331751	0.00381227	0.481542	0.00326198	0.548663	Predicted ORF in Assemblies 19, 20 and 21
orf19.2934	orf19.2934	-0.0113054	0.135553	-0.0206974	0.127184	0.00268039	0.797451	-0.0061372	0.358713	Predicted ORF in Assemblies 19, 20 and 21
orf19.2935	RPL10	-0.0742837	0.00604359	-0.129308	0.0100583	-0.077274	0.0788251	-0.101021	0.0213053	Putative ribosomal protein; genes encoding cytoplasmic ribosomal subunits, translation factors, and tRNA synthetases downregulated upon phagocytosis by murine macrophage; transcription regulated upon yeast-hyphal switch; intron in 5'-UTR
orf19.2938	orf19.2938	-0.0181377	0.327302	0.00879641	0.760257	0.00264246	0.801404	-0.0398051	0.0627492	Protein not essential for viability
orf19.2940	orf19.2940	-0.00197747	0.762804	0.00122644	0.805263	0.00326844	0.364034	0.00283183	0.265705	Predicted ORF in Assemblies 19, 20 and 21
orf19.2942	DIP5	0.0030264	0.520972	-0.0028464	0.411956	0.0014341	0.70921	0.00169817	0.705084	Putative permease for dicarboxylic amino acids; mutation confers hypersensitivity to toxic ergosterol analog; transcriptionally induced upon phagocytosis by macrophage; Gcn4p-regulated; upregulated by Rim101p at pH 8
orf19.2943.5	orf19.2943.5	-0.012277	0.298364	-0.0100886	0.361425	5.37383e-05	0.991948	-0.00548501	0.618624	ORF Predicted by Annotation Working Group
orf19.2945	PUT4	-0.00994866	0.290728	-0.0477006	0.592791	-0.0681985	0.117472	-0.162116	0.00352448	Putative proline permease; fungal-specific (no human or murine homolog); repressed during the mating process
orf19.2946	HNM4	0.00104603	0.898492	-0.00179124	0.904357	0.00536284	0.777194	0.00377019	0.684129	Putative choline permease; fungal-specific (no human or murine homolog)
orf19.2948	SNO1	0.00863232	0.122998	0.00220265	0.719179	0.00220458	0.657625	0.00806464	0.0377472	Protein of unknown function expressed during stationary phase; transcription is regulated by Tup1p, Efg1p
orf19.295	orf19.295	0.0135392	0.10605	0.00874762	0.216308	0.0088384	0.130437	0.00824269	0.152063	Predicted ORF in Assemblies 19, 20 and 21
orf19.2954	orf19.2954	0.00061194	0.767386	0.0027947	0.0692573	0.000567171	0.817886	0.00343489	0.168361	Predicted ORF in Assemblies 19, 20 and 21; repressed by nitric oxide; possibly spurious ORF (Annotation Working Group prediction)
orf19.2957	orf19.2957	0.0035133	0.369282	0.00222568	0.570532	-0.000752785	0.874754	0.00405403	0.416193	Predicted ORF in Assemblies 19, 20 and 21; transcription is induced in response to alpha pheromone in SpiderM medium
orf19.2958	orf19.2958	-0.00031186	0.951994	0.00046919	0.937021	-0.00257018	0.667262	0.00282033	0.753071	Predicted ORF in Assemblies 19, 20 and 21
orf19.2959.1	orf19.2959.1	0.0176143	0.0768403	0.00355465	0.860874	0.00985258	0.39736	0.00400177	0.830216	ORF Predicted by Annotation Working Group
orf19.2960	FRS2	0.00291972	0.655369	0.00137989	0.876072	0.0014209	0.823165	0.000582015	0.948996	Putative tRNA-Phe synthetase; genes encoding ribosomal subunits, translation factors, and tRNA synthetases are downregulated upon phagocytosis by murine macrophage
orf19.2962	orf19.2962	-0.0144802	0.137412	-0.00265809	0.68914	0.00534304	0.569893	-0.0080248	0.115569	Predicted ORF in Assemblies 19, 20 and 21; possibly spurious ORF (Annotation Working Group prediction)
orf19.2963	orf19.2963	0.0101926	0.130088	0.0032279	0.829431	0.00290698	0.582806	0.00423868	0.498127	Predicted ORF in Assemblies 19, 20 and 21
orf19.2965	orf19.2965	0.00256697	0.282537	0.000613893	0.928483	0.000936419	0.712391	0.00318122	0.261948	Predicted ORF in Assemblies 19, 20 and 21
orf19.2967	TIF34	-0.0629899	0.00738614	-0.0665716	0.00161329	-0.0237982	0.15374	-0.0619399	0.0342059	Putative translation initiation factor; mutation confers hypersensitivity to roridin A and verrucarin A; genes encoding ribosomal subunits, translation factors, and tRNA synthetases are downregulated upon phagocytosis by murine macrophage
orf19.2969	RAD16	0.0084834	0.122275	0.00881327	0.362937	-0.00322086	0.734124	-0.00156434	0.825815	Protein similar to S. cerevisiae Rad16p; flucytosine induced
orf19.297	DTD2	0.012969	0.289185	0.020668	0.380458	0.0162367	0.270349	0.0191706	0.275838	Predicted ORF in Assemblies 19, 20 and 21
orf19.2970	LYS2	0.00694395	0.132434	0.000954474	0.788255	0.00831468	0.169757	0.00703069	0.23666	Large subunit of heterodimeric alpha-aminoadipate reductase; enzyme of lysine biosynthesis; contains predicted binding sites for AMP and alpha-aminoadipate; feedback inhibited by lysine or thialysine; regulated by Gcn2p and Gcn4p
orf19.2972	PDE2	-0.000532271	0.933308	0.00102604	0.751776	-0.00297069	0.819165	-0.00100322	0.792433	Cyclic nucleotide phosphodiesterase, high affinity; role in moderating signaling via cAMP; required for wild-type virulence, hyphal growth, switching, and cell wall, but not for pseudohyphal growth; expressed shortly after hyphal induction
orf19.2973	orf19.2973	-0.0264039	0.0347914	-0.0185342	0.53877	0.00815561	0.294765	-0.00755414	0.524882	Predicted ORF in Assemblies 19, 20 and 21
orf19.2974	YKT6	0.00259492	0.671103	0.00429349	0.665126	0.00643558	0.164944	0.0042013	0.201884	Predicted ORF in Assemblies 19, 20 and 21
orf19.2975	YPT7	-0.00500399	0.350059	0.00139598	0.887793	0.000488396	0.911736	0.000495388	0.962142	Protein of YPT/RAB family; induced during the mating process
orf19.2977	orf19.2977	0.00642903	0.430159	0.0170072	0.146839	0.00911758	0.26789	0.0118928	0.126993	Predicted ORF in Assemblies 19, 20 and 21
orf19.2978	orf19.2978	-0.00141386	0.78878	0.00241863	0.785516	0.00183239	0.771519	0.00117649	0.780142	Predicted ORF in Assemblies 19, 20 and 21; possibly spurious ORF (Annotation Working Group prediction)
orf19.298	orf19.298	-0.000713136	0.86905	0.001594	0.664077	-0.00696379	0.405116	-0.00522248	0.35309	ORF Predicted by Annotation Working Group
orf19.2980	orf19.2980	0.00424263	0.627242	0.00860426	0.260714	-0.00261485	0.791867	0.0097172	0.109652	Predicted ORF in Assemblies 19, 20 and 21
orf19.2982	orf19.2982	0.00990889	0.0740616	0.00836696	0.373418	-0.00773003	0.298538	0.000599172	0.934059	Predicted ORF in Assemblies 19, 20 and 21
orf19.2986	orf19.2986	-0.00394873	0.67021	-0.00299235	0.791433	0.0027359	0.575526	0.00409266	0.694095	Predicted ORF in Assemblies 19, 20 and 21
orf19.2987	orf19.2987	0.000176989	0.976931	0.000121099	0.993216	-0.00174781	0.712391	0.00698422	0.562183	Predicted ORF in Assemblies 19, 20 and 21; fungal-specific (no human or murine homolog)
orf19.2988	orf19.2988	-0.001109	0.921439	-0.0163666	0.1271	-0.0127232	0.350765	-0.0107964	0.19492	Predicted ORF in Assemblies 19, 20 and 21
orf19.2989	orf19.2989	0.00743022	0.0579704	0.0121938	0.0717357	-0.000490103	0.954643	-0.000659125	0.90583	Predicted ORF in Assemblies 19, 20 and 21
orf19.299	ECM14	-0.00461322	0.49844	-0.016492	0.193121	-0.00292524	0.440202	-0.00146125	0.67997	Predicted ORF in Assemblies 19, 20 and 21
orf19.2990	XOG1	0.000594381	0.92202	-5.15106e-05	0.99451	-0.00526986	0.577962	0.00248706	0.661942	Exo-1,3-beta-glucanase, major exoglucanase; member of family 5 glycosyl hydrolases; affects sensitivity to inhibitors of chitin and glucan synthesis; not required for yeast-to-hyphal transition or for virulence in mouse systemic infection
orf19.2991	HOL1	0.00785047	0.48314	-0.0212912	0.661858	-0.0278915	0.168433	-0.0342331	0.250209	Predicted ORF in Assemblies 19, 20 and 21; transcription is regulated by Nrg1p; macrophage/pseudohyphal-repressed; transcription is induced in response to alpha pheromone in SpiderM medium
orf19.2992	RPP1A	-0.000212029	0.982805	0.00417283	0.193121	0.00387016	0.0423658	-0.000418038	0.901064	Conserved acidic ribosomal protein, likely to be involved in regulation of translation elongation; interacts with Rpp2Bp; one of four similar C. albicans ribosomal proteins (Rpp1Ap, Rpp1Bp, Rpp2Ap, Rpp2Bp)
orf19.2995	orf19.2995	0.0093833	0.41826	-0.0116818	0.225973	0.00310776	0.79606	0.00571678	0.652553	Predicted ORF in Assemblies 19, 20 and 21; induced by nitric oxide
orf19.2996	orf19.2996	0.0167167	0.0425003	0.0211042	0.293462	0.0125828	0.267717	0.0113911	0.535378	Predicted ORF in Assemblies 19, 20 and 21
orf19.2998	TSR2	-0.0014977	0.762916	-0.00868451	0.1464	0.00307768	0.716751	-0.00574349	0.422869	Predicted ORF in Assemblies 19, 20 and 21; decreased expression in response to prostaglandins
orf19.300	AIP2	0.00532672	0.301381	0.00167684	0.744712	0.00848073	0.0743476	0.00434062	0.350001	Protein described as an actin interacting protein; regulated by Gcn4p; induced in response to amino acid starvation (3-aminotriazole treatment); repressed in the presence of elevated CO2
orf19.3000	ORC1	-0.00331434	0.542536	0.00402815	0.654736	0.0016627	0.891706	0.00237554	0.839489	Predicted ORF in Assemblies 19, 20 and 21; essential for viability; similar to S. cerevisiae Orc1p origin recognition complex subunit
orf19.3001	TEM1	-0.160184	0.0703301	-0.211618	0.0224573	-0.0989569	0.0158978	-0.197783	0.0242106	Protein similar to S. cerevisiae Tem1p, which is a GTPase involved in termination of the M phase of the cell cycle; induced under Cdc5p depletion
orf19.3002	RPS1	-0.256171	0.00568397	-0.281086	0.0482189	-0.265586	0.0184221	-0.30019	0.00133385	Probable ortholog of S. cerevisiae ribosomal protein Rp10 (Rps1Ap and Rps1Bp), elicits a host antibody response during infection; transcription is induced during active growth
orf19.3003	orf19.3003	0.00851149	0.209884	0.00551393	0.639574	0.0062233	0.238524	-0.0105977	0.504305	Predicted ORF in Assemblies 19, 20 and 21
orf19.3006	orf19.3006	0.00146746	0.830758	0.00154499	0.814547	0.00196718	0.702338	0.00301334	0.535378	Predicted ORF in Assemblies 19, 20 and 21
orf19.3007	orf19.3007	0.0139009	0.0855955	-0.00692598	0.454373	0.0106878	0.0566608	0.00923077	0.0888589	Predicted ORF in Assemblies 19, 20 and 21
orf19.3008	COQ4	0.00674794	0.391334	0.00495641	0.781237	0.00527841	0.480386	0.0123901	0.0244661	Protein described as having role in coenzyme Q biosynthesis; transcriptionally induced by interaction with macrophage
orf19.3009	orf19.3009	0.0182782	0.0495135	0.0115042	0.23202	0.0149928	0.0566608	0.0110161	0.094278	Protein not essential for viability
orf19.301	PGA18	0.00734538	0.122365	0.00147411	0.763259	0.00236852	0.779621	0.00594536	0.044563	Putative GPI-anchored protein of unknown function; regulated by Nrg1p, Tup1p
orf19.3010	orf19.3010	0.0130725	0.044449	0.00269007	0.821498	0.00564531	0.331534	0.00217695	0.548801	Predicted ORF in Assemblies 19, 20 and 21
orf19.3012	ARO80	0.0113686	0.261618	-0.00588928	0.797828	0.00270053	0.872483	0.0164519	0.114579	Regulator of aromatic alcohol biosynthesis via the Ehrlich pathway; not essential for viability; similar to S. cerevisiae Aro80p, which is a transcriptional activator required for aromatic amino acid catabolism
orf19.3013	CDC12	0.00272203	0.668046	-0.00121659	0.923083	0.00816574	0.308244	0.0065479	0.160821	Septin; essential for viability; gene has predicted splice sites; forms ring at sites of cell division and also forms filaments in mature chlamydospore; filamentous growth induced; regulated by Nrg1p, Tup1p, tyrosol and cell density
orf19.3014	BMH1	-0.00785943	0.322314	0.0049025	0.336197	-0.0129075	0.113404	-0.00566964	0.434287	14-3-3 protein, role in hyphal growth; possibly regulated by host interaction; sole 14-3-3 protein in C. albicans while S. cerevisiae has two 14-3-3 proteins; localizes to cell surface of yeast-form cells but not of hyphae; intron in 5'-UTR
orf19.3016	orf19.3016	0.00185479	0.60832	0.0113071	0.0421847	0.00500598	0.144198	0.004575	0.548651	Predicted ORF in Assemblies 19, 20 and 21
orf19.3018	SPP1	-0.00145635	0.79747	0.00411503	0.318499	-0.00407227	0.58806	0.000577005	0.816369	Predicted ORF in Assemblies 19, 20 and 21; induced by nitric oxide in yhb1 mutant; cell-cycle regulated periodic mRNA expression
orf19.3019	orf19.3019	0.00925698	0.089472	0.00912126	0.294112	0.0026215	0.679256	0.00182949	0.836897	Transcription may be increased in an azole-resistant strain that overexpresses MDR1
orf19.302	orf19.302	0.00274025	0.247332	0.000956833	0.863214	0.00119213	0.672593	0.000179832	0.964789	Predicted ORF in Assemblies 19, 20 and 21
orf19.3022	orf19.3022	0.00459842	0.512578	0.00298176	0.860475	-0.00693089	0.142239	0.00235256	0.751593	Predicted ORF in Assemblies 19, 20 and 21
orf19.3023	orf19.3023	-0.00145079	0.651622	0.00457795	0.404602	0.000148038	0.979125	0.00101724	0.806582	Predicted ORF in Assemblies 19, 20 and 21
orf19.3026	MAS1	-0.00541206	0.685621	-0.012117	0.469392	-0.00921643	0.447473	0.000694751	0.970962	Predicted ORF in Assemblies 19, 20 and 21; transcription is regulated by Nrg1p; oxidative stress-induced via Cap1p
orf19.3027	orf19.3027	-0.00276093	0.691657	-0.00739052	0.635816	-0.00300454	0.787198	-0.0142554	0.050163	Predicted ORF in Assemblies 19, 20 and 21
orf19.3030	orf19.3030	-0.00588445	0.243121	-0.009938	0.265203	-0.00146438	0.905169	-0.00329464	0.59408	Predicted ORF in Assemblies 19, 20 and 21
orf19.3035	orf19.3035	0.00836059	0.132391	0.0159244	0.0200164	0.0057106	0.176893	0.0116618	0.023304	Predicted ORF in Assemblies 19, 20 and 21
orf19.304	orf19.304	0.00482082	0.296381	0.000431651	0.978295	0.00364901	0.439893	0.0105026	0.237926	Putative transporter similar to MDR proteins; fungal-specific (no human or murine homolog)
orf19.3040	EHT1	-0.00198419	0.617259	0.000825414	0.91615	-0.00155265	0.619774	0.00236486	0.850275	Protein similar to S. cerevisiae Eht1p; transcription is induced in response to alpha pheromone in SpiderM medium
orf19.3041	orf19.3041	0.00163537	0.804629	0.0020993	0.842196	0.00567395	0.178217	0.00727178	0.110371	Predicted ORF in Assemblies 19, 20 and 21
orf19.3043	orf19.3043	0.00322882	0.578639	0.00345319	0.738198	0.00902768	0.165563	0.0116719	0.160821	Predicted ORF in Assemblies 19, 20 and 21
orf19.3045	orf19.3045	0.000755191	0.92202	0.00875194	0.0333526	0.00385148	0.284168	0.00163987	0.617773	Predicted ORF in Assemblies 19, 20 and 21; virulence-group-correlated expression
orf19.3048	orf19.3048	0.00725109	0.0703301	-0.00148758	0.935451	0.0143861	0.0732236	-0.0130258	0.343348	Predicted ORF in Assemblies 19, 20 and 21; transcription is repressed in response to alpha pheromone in SpiderM medium
orf19.305	orf19.305	-0.00047262	0.941588	-0.00364621	0.45131	-0.00953366	0.594695	0.000441487	0.932386	Predicted ORF in Assemblies 19, 20 and 21; greater mRNA abundance observed in a cyr1 homozygous null mutant than in wild type
orf19.3050	AGE1	0.0091072	0.0975804	0.00509246	0.287124	0.00481106	0.236305	0.00775484	0.094278	Protein described as a GTPase activator; transcriptionally regulated by iron; expression greater in low iron
orf19.3051	orf19.3051	0.00705011	0.14255	0.00253098	0.846102	3.36464e-05	0.996236	0.00364403	0.586855	Predicted ORF in Assemblies 19, 20 and 21; shows colony morphology-related gene regulation by Ssn6p
orf19.3054	RPN3	0.00981109	0.0606657	0.00287608	0.685	0.00992828	0.0500904	0.010498	0.12316	Predicted ORF in Assemblies 19, 20 and 21; amphotericin B repressed; oxidative stress-induced via Cap1p
orf19.3058	orf19.3058	0.00126583	0.929673	-0.0525249	0.467648	0.00810347	0.42433	0.00530858	0.626229	Predicted ORF in Assemblies 19, 20 and 21
orf19.3059	SUA71	-0.0177155	0.022893	0.00139357	0.926824	-0.00857188	0.419383	-0.00414202	0.728235	Predicted transcriptional regulator; downregulated during planktonic growth, whereas related SUA72 is induced; transcription is positively regulated by Tbf1p
orf19.306	USO5	0.00710757	0.0703301	0.00326756	0.380022	0.00453619	0.148408	0.00384759	0.394651	Protein of unknown function; transcription is induced upon filamentous growth and in response to alpha pheromone in SpiderM medium
orf19.3061.1	orf19.3061.1	0.00141539	0.538233	0.0102689	0.11049	0.00168893	0.741859	0.00724822	0.263284	Predicted ORF in Assembly 20 and 21; gene has intron; similar to RPS22A/orf19.6265
orf19.3063	orf19.3063	0.0052814	0.553767	0.00561166	0.666684	0.00435163	0.46375	0.00282262	0.781575	Phosphorylated protein of unknown function; predicted ORF in Assemblies 19, 20 and 21
orf19.3065	DAO1	-0.0453944	0.0797337	-0.0314376	0.0184835	-0.0764092	0.231699	-0.0274338	0.114364	Putative D-amino acid oxidase; transcription is regulated upon yeast-hyphal switch
orf19.3066	ENG1	-0.00423632	0.361599	0.00613359	0.563738	-0.014804	0.115156	0.00776128	0.29781	Endo-1,3-beta-glucanase required for cell separation after division, orthologous to S. cerevisiae Dse4p; caspofungin repressed; fungal-specific (no human or murine homolog); repressed in response to alpha pheromone in SpiderM medium
orf19.3071	MIH1	-0.0106562	0.122585	-0.00326167	0.320301	-0.000346634	0.964819	-0.0030792	0.766637	Putative protein phosphatase of the PTP family (tyrosine-specific), similar to S. cerevisiae Mih1p
orf19.3074	TLO10	-0.000943286	0.910269	-0.00453682	0.832391	-0.00276089	0.46375	0.00246327	0.732049	Member of a family of telomere-proximal genes of unknown function
orf19.3076	orf19.3076	-0.000397381	0.946247	-0.00521267	0.414513	-0.00116795	0.816759	0.00140099	0.876035	Predicted ORF in Assemblies 19, 20 and 21
orf19.3077	VID21	-0.00553264	0.660409	-0.0186536	0.521423	-0.0312422	0.338294	-0.0192202	0.297239	Subunit of the NuA4 histone acetyltransferase complex; soluble protein in hyphae
orf19.308	orf19.308	-0.00333574	0.487825	0.0148974	0.112222	0.00226482	0.627143	0.00524166	0.383317	Predicted ORF in Assemblies 19, 20 and 21
orf19.3080	orf19.3080	-0.00355337	0.381951	0.0189945	0.1464	-0.00190561	0.819713	0.00991205	0.0728477	Predicted ORF in Assemblies 19, 20 and 21
orf19.3084	orf19.3084	-0.00177824	0.816781	0.00792015	0.320732	-0.00270813	0.458208	0.00779415	0.131634	Predicted ORF in Assemblies 19, 20 and 21
orf19.309	DAL5	-0.0295331	0.00903577	-0.0189653	0.100388	-0.014011	0.200104	-0.0429179	0.00542482	Putative allantoate permease; nitrogen catabolite repressed gene, induced in absence of preferred N sources; gene regulation by nitrogen source requires Gat1p; fungal-specific (no human or murine homolog)
orf19.3091	orf19.3091	-0.012356	0.162436	-0.0116889	0.540072	-0.021996	0.107576	-0.0318844	0.265485	Predicted ORF in Assemblies 19, 20 and 21; downregulated during core stress response
orf19.3093	MSH2	-0.0213708	0.124785	-0.00596025	0.540186	-0.00909355	0.0986619	0.000781899	0.934853	Protein described as DNA mismatch repair factor; transcription is regulated by Nrg1p; flucytosine repressed; RNA abundance regulated by tyrosol and cell density
orf19.3097	PDA1	0.00545971	0.350313	0.00156841	0.815697	0.00201687	0.67156	0.012831	0.0172632	Protein described as similar to alpha chain of pyruvate dehydrogenase; fluconazole-induced; protein detected by mass spec in exponential and stationary phase cultures
orf19.3098	orf19.3098	0.00207989	0.284832	0.000585795	0.94661	-0.00235761	0.428118	0.0022298	0.278888	Predicted ORF in Assemblies 19, 20 and 21
orf19.3099	TRP4	0.00476965	0.556426	0.00972588	0.0895078	0.00197588	0.757932	-0.00431758	0.658733	Predicted enzyme of amino acid biosynthesis; upregulated in biofilm; regulated by Gcn2p and Gcn4p; S. cerevisiae ortholog is Gcn4p regulated
orf19.3100	orf19.3100	-0.0104327	0.464343	-0.0710171	0.0215278	-0.0190349	0.120219	-0.0366818	0.11977	Predicted ORF in Assemblies 19, 20 and 21; transcription is repressed in response to alpha pheromone in SpiderM medium
orf19.3103	orf19.3103	0.0135628	0.330489	0.0165627	0.107698	0.0123434	0.0986619	0.0194265	0.0781256	Predicted ORF in Assemblies 19, 20 and 21
orf19.3105	orf19.3105	0.00572493	0.54657	0.00241872	0.87728	0.00859166	0.298538	0.00957477	0.306585	Predicted ORF in Assemblies 19, 20 and 21
orf19.3110	orf19.3110	0.00225311	0.661373	-0.00628841	0.280588	0.00540197	0.376778	0.00532498	0.497197	Predicted ORF in Assemblies 19, 20 and 21
orf19.3115	orf19.3115	0.00357869	0.535947	-0.0103049	0.519132	-0.0117541	0.235811	0.00201899	0.794513	Predicted ORF in Assemblies 19, 20 and 21; possibly spurious ORF (Annotation Working Group prediction)
orf19.3116	EXM2	-0.0037837	0.594784	0.00673991	0.198707	0.000487911	0.883369	0.00310295	0.684129	Decreased transcription is observed upon fluphenazine treatment
orf19.3120	orf19.3120	-0.0209785	0.0501834	0.00221404	0.926153	-0.00699566	0.828836	-0.0190115	0.120305	Putative PDR-subfamily ABC transporter (half-size); similar to WHITE subfamily proteins; decreased transcription is observed upon fluphenazine treatment or in an azole-resistant strain that overexpresses CDR1 and CDR2; induced by nitric oxide
orf19.3121	GST1	0.00938429	0.40524	0.00257448	0.830659	0.0139474	0.144198	0.00464725	0.554742	Predicted ORF in Assemblies 19, 20 and 21; upregulated in the presence of human neutrophils; expression is regulated upon white-opaque switching; increased transcription is observed upon benomyl treatment
orf19.3122	ARR3	-0.014775	0.223383	-0.0115356	0.595065	-0.00143544	0.887086	-0.00729026	0.586855	Protein not essential for viability; similar to S. cerevisiae Arr3p, which is an arsenite transporter of the plasma membrane required for resistance to arsenic compounds; benomyl-induced; Gcn4p-regulated
orf19.3122.2	orf19.3122.2	0.00217104	0.489007	0.00878777	0.0769597	0.0020286	0.58806	0.00332371	0.399544	ORF Predicted by Annotation Working Group
orf19.3123	RPT5	0.00495356	0.340119	0.00714885	0.656268	0.00138737	0.732236	-0.000975577	0.925044	Predicted ORF in Assemblies 19, 20 and 21; transcription is regulated by Nrg1p and Mig1p; regulated by Gcn2p and Gcn4p; protein level decreased in stationary phase cultures
orf19.3123.2	orf19.3123.2	-0.0132492	0.617092	-0.042345	0.139499	-0.017002	0.0675164	-0.0217406	0.439792	ORF Predicted by Annotation Working Group
orf19.3124	orf19.3124	0.0116833	0.143644	0.00430412	0.550892	0.00860513	0.274021	0.0128449	0.106853	Predicted ORF in Assemblies 19, 20 and 21
orf19.3125	orf19.3125	-0.00932111	0.334148	-0.0381287	0.435081	-0.00550797	0.798921	-0.010756	0.131306	Protein not essential for viability
orf19.3126	CCT6	-0.00565504	0.630115	-0.0151914	0.361122	-0.0117738	0.253321	-0.020049	0.367761	Predicted ORF in Assemblies 19, 20 and 21; mutation confers hypersensitivity to cytochalasin D
orf19.3127	CZF1	-0.0167026	0.478783	-0.0343396	0.312716	-0.0128757	0.386913	-0.0334924	0.278888	Transcriptional regulator of white-opaque switching frequency; hyphal growth regulator; has C-terminal zinc finger and central Glu-rich region; expression in S. cerevisiae causes dominant-negative inhibition of pheromone response
orf19.3128	orf19.3128	0.00568873	0.331969	0.00248353	0.814751	-0.00658661	0.155492	0.00364385	0.507688	Predicted ORF in Assemblies 19, 20 and 21
orf19.3129	orf19.3129	-0.266843	0.00231551	-0.139025	0.288949	-0.0238093	0.117472	-0.0343685	0.0109803	Predicted ORF in Assemblies 19, 20 and 21; heterozygous null mutant displays sensitivity to virgineone
orf19.3130	orf19.3130	0.00177397	0.977767	-0.0328572	0.401328	-0.0713542	0.278279	-0.0212142	0.639332	Predicted ORF in Assemblies 19, 20 and 21
orf19.3133	GUT2	-0.111807	0.00196037	-0.225327	0.0574815	-0.0684299	0.00648391	-0.158338	0.112611	Predicted ORF in Assemblies 19, 20 and 21; Plc1p-regulated; transcription is upregulated in both intermediate and mature biofilms
orf19.3136	orf19.3136	0.00229593	0.564603	0.00404164	0.542591	0.00166582	0.594288	0.0043793	0.507547	Predicted ORF in Assemblies 19, 20 and 21
orf19.3138	NOP1	-0.348448	0.00196037	-0.209553	0.0708919	-0.0517632	0.0732236	-0.0566703	0.0101412	Nucleolar protein; flucytosine induced
orf19.3140	orf19.3140	-0.00153515	0.87023	0.00587787	0.559962	0.00123194	0.855483	-0.00409918	0.383492	Predicted ORF in Assemblies 19, 20 and 21
orf19.3141	orf19.3141	-0.00101067	0.932417	0.00511477	0.100388	0.0149564	0.0423527	-0.000370903	0.965638	Predicted ORF in Assemblies 19, 20 and 21
orf19.3142	orf19.3142	0.00504568	0.322994	-0.00201808	0.923083	0.00181261	0.81381	0.00332039	0.507733	Predicted ORF in Assemblies 19, 20 and 21
orf19.3147	orf19.3147	0.0096759	0.202246	0.00666998	0.507526	0.00473267	0.294765	0.00934896	0.081651	Predicted ORF in Assemblies 19, 20 and 21
orf19.3148	orf19.3148	-0.0108166	0.147587	-0.00392783	0.800848	0.00991067	0.0454481	-0.0148738	0.0662586	Predicted ORF in Assemblies 19, 20 and 21
orf19.3149	LSP1	0.00112859	0.850174	-5.80491e-05	0.995997	-1.66476e-06	0.999439	0.0080126	0.434549	Predicted ORF in Assemblies 19, 20 and 21; caspofungin repressed; biofilm induced; fungal-specific (no human or murine homolog); protein detected by mass spec in exponential and stationary phase cultures
orf19.3151	orf19.3151	-0.0114728	0.51659	0.00641196	0.656809	0.0110177	0.208392	0.000776396	0.948996	Predicted ORF in Assemblies 19, 20 and 21
orf19.3152	AMO2	-0.00364606	0.523343	0.00137301	0.743386	0.00217226	0.562382	-0.000337813	0.934635	Protein similar to A. niger predicted peroxisomal copper amino oxidase; mutation confers hypersensitivity to toxic ergosterol analog; induced upon biofilm formation
orf19.3156	orf19.3156	0.00602625	0.130088	0.0035242	0.849953	-0.000341286	0.96624	-0.000386149	0.968029	Predicted ORF in Assemblies 19, 20 and 21; transcriptionally activated by Mnl1p under weak acid stress
orf19.3159.4	orf19.3159.4	0.00715299	0.132434	0.0136584	0.240714	0.00123585	0.895598	0.00562057	0.172159	ORF Predicted by Annotation Working Group
orf19.3161	orf19.3161	0.00213511	0.813408	-0.00264699	0.869795	0.0052812	0.108502	0.000304443	0.959933	Predicted ORF in Assemblies 19, 20 and 21
orf19.3167	orf19.3167	-0.00576824	0.179112	0.000471834	0.958257	0.00104932	0.799753	0.00504352	0.626266	Predicted ORF in Assemblies 19, 20 and 21
orf19.3168	RPN8	0.00807649	0.209032	0.00923046	0.140975	0.00308243	0.634977	0.00260555	0.68426	Predicted ORF in Assemblies 19, 20 and 21; mutation confers hypersensitivity to amphotericin B; transcription is regulated by Mig1p; regulated by Gcn2p and Gcn4p
orf19.3169	orf19.3169	0.00339082	0.817682	0.0117976	0.438941	-0.00971148	0.271265	-0.00229555	0.764955	Predicted ORF in Assemblies 19, 20 and 21
orf19.3170	orf19.3170	0.00140223	0.762914	-0.00418572	0.480457	0.00262609	0.703865	0.00876644	0.22816	Predicted ORF in Assemblies 19, 20 and 21
orf19.3172	orf19.3172	0.00348517	0.338373	0.00220772	0.783636	0.00234599	0.538802	0.00463675	0.514157	Predicted ORF in Assemblies 19, 20 and 21
orf19.3173	orf19.3173	0.00329848	0.218825	0.00493378	0.325363	0.00253461	0.469484	0.00253044	0.616681	Predicted ORF in Assemblies 19, 20 and 21
orf19.3174	CDC24	0.00234504	0.632663	0.00416407	0.301548	0.00553169	0.333851	0.00365759	0.42779	GDP-GTP exchange factor for Cdc42p; phosphorylated; required for maintenance of hyphal growth; misexpression blocks hyphal growth and causes avirulence in a mouse model of systemic infection; antigenic during human oral infection
orf19.3175	orf19.3175	0.00356732	0.366371	0.00212599	0.764802	0.00380611	0.373161	0.00698024	0.0360223	Predicted ORF in Assemblies 19, 20 and 21; alkaline downregulated; repressed by nitric oxide; virulence-group-correlated expression
orf19.3176	RIM21	0.00607564	0.408165	0.000798284	0.880734	0.000960815	0.857462	0.00150037	0.626229	Protein involved in the pH response pathway; required for activation of the transcription factor Rim101p and for alkaline pH-induced hyphal growth; may function as a sensor of alkaline pH
orf19.3177	orf19.3177	-0.0065151	0.149446	0.00185122	0.904669	-0.00311464	0.653133	0.000656866	0.947092	Predicted ORF in Assemblies 19, 20 and 21
orf19.3178	orf19.3178	0.00981548	0.0621855	0.0101581	0.162377	0.00281303	0.604801	0.00985096	0.114364	Predicted ORF in Assemblies 19, 20 and 21
orf19.318	orf19.318	0.00169534	0.803394	0.00784646	0.198707	0.00784467	0.120422	0.00209115	0.824651	Predicted ORF in Assemblies 19, 20 and 21
orf19.3180	orf19.3180	-0.0052291	0.349787	0.0054377	0.0392924	0.0011567	0.480386	0.00336989	0.462086	Predicted ORF in Assemblies 19, 20 and 21
orf19.3181.1	orf19.3181.1	0.00248009	0.813408	-0.00266806	0.773083	0.00156368	0.79606	0.00485579	0.512168	ORF Predicted by Annotation Working Group
orf19.3182	GIS2	-0.00218261	0.80046	-0.00688281	0.629292	0.00151432	0.819713	0.00503658	0.553279	Transcriptionally regulated by iron; expression greater in high iron; transcription reduced upon yeast-hyphal switch; similar to proteins that bind nucleic acid
orf19.3183	orf19.3183	0.0035586	0.612175	0.0110776	0.446008	-0.00138428	0.828732	0.00198645	0.779141	Predicted ORF in Assemblies 19, 20 and 21; possibly spurious ORF (Annotation Working Group prediction)
orf19.3185	orf19.3185	0.00356929	0.331969	0.00203473	0.347056	-6.7553e-05	0.979928	0.00194857	0.327716	Predicted ORF in Assemblies 19, 20 and 21
orf19.3190	HAL9	-0.00321528	0.825473	-0.00818265	0.599803	-0.00295488	0.856729	-0.0035796	0.956512	Protein with Zn(2)-Cys(6) binuclear cluster; gene in zinc cluster region of Chr. 5; transcriptionally activated by Mnl1p in weak acid; similar to S. cerevisiae Hal9p, which is a putative transcription factor involved in salt tolerance
orf19.3192	STI1	0.00347309	0.821581	-0.00216341	0.914864	-0.00157904	0.879272	0.00129877	0.952001	Protein that interacts with Cdc37p and Crk1p in two-hybrid system; may be involved in Cdc37p chaperone activity; biofilm induced; soluble protein in hyphae; protein detected by mass spec in exponential and stationary phase cultures
orf19.3196	orf19.3196	-0.000376386	0.965788	-0.0149931	0.0167116	0.000288869	0.941925	-0.00122442	0.819256	Predicted ORF in Assemblies 19, 20 and 21
orf19.3197	PAP1	-0.0930616	0.0540249	-0.0843429	0.156287	-0.0548884	0.0727939	-0.0422441	0.0137466	Poly(A) polymerase, likely involved in mRNA polyadenylation; PAP is inhibited by parnafungin antifungals; gene is located within the MTLa mating-type-like locus
orf19.320	orf19.320	-0.00397217	0.354916	-0.0141296	0.481227	0.00216175	0.716927	0.00229578	0.763332	Predicted ORF in Assemblies 19, 20 and 21
orf19.3201	MTLA1	-0.00142756	0.855149	0.0126127	0.0292054	0.00467705	0.589742	-0.0129266	0.20292	A1p and Alpha2p act together to repress white-opaque switching and mating (an opaque-specific process); homeodomain protein; gene of the MTLa (Mating Type Like) locus; a/alpha mating type may increase virulence, competitive advantage
orf19.3202	orf19.3202	0.0026284	0.365794	0.00733762	0.421094	-0.00752642	0.392835	0.00565451	0.394387	Protein not essential for viability
orf19.3203	RCY1	0.00472102	0.259051	0.000993926	0.873665	0.00620326	0.294712	0.0099187	0.059217	Putative F-box protein involved in endocytic membrane traffic and/or recycling; fungal-specific (no human or murine homolog)
orf19.3204	orf19.3204	-0.00111187	0.834936	0.00305563	0.486195	0.0070674	0.509135	-0.00468952	0.49141	Predicted ORF in Assemblies 19, 20 and 21
orf19.3205	orf19.3205	0.0150532	0.291593	0.0257764	0.264189	0.0144596	0.247591	-0.000431787	0.982632	Predicted ORF in Assemblies 19, 20 and 21
orf19.3207	CCN1	0.00771285	0.122998	0.00328396	0.33522	0.0060897	0.121901	0.00809221	0.0256576	G1 cyclin; required for hyphal growth maintenance (not initiation); cell-cycle regulated transcription (G1/S); Cdc28p-Ccn1p initiates Cdc11p S394 phosphorylation on hyphal induction; expression in S. cerevisiae inhibits pheromone response
orf19.321	orf19.321	-0.00120859	0.854302	0.00565758	0.403546	-0.00261988	0.469561	0.0086348	0.030628	Predicted ORF in Assemblies 19, 20 and 21
orf19.3210	orf19.3210	0.000573647	0.912392	0.00517817	0.668983	-1.4206e-05	0.996236	0.00186045	0.877339	Predicted ORF in Assemblies 19, 20 and 21; Plc1p-regulated; possibly spurious ORF (Annotation Working Group prediction)
orf19.3211	RCF3	0.000208135	0.973668	0.0017863	0.827715	-0.00614947	0.311132	0.00208372	0.676598	Transcription is induced upon filamentous growth
orf19.3212	MID1	-0.00176296	0.570187	0.00486695	0.174459	0.00519616	0.407353	0.00159306	0.687143	Putative stretch-activated Ca2+ channel of the high affinity calcium uptake system; role in thigmotropism; decreased transcription is observed upon fluphenazine treatment or in an azole-resistant strain with CDR1 and CDR2 overexpression
orf19.3213	orf19.3213	-0.00924483	0.356287	0.00728149	0.177242	0.00492422	0.303479	0.00418879	0.397843	Predicted ORF in Assemblies 19, 20 and 21
orf19.3214	orf19.3214	-8.89797e-05	0.983279	0.00249903	0.58203	-0.001298	0.702357	-0.00195517	0.699656	Predicted ORF in Assemblies 19, 20 and 21; possibly spurious ORF (Annotation Working Group prediction)
orf19.3215	orf19.3215	-0.00168884	0.415522	0.000307498	0.964502	-0.00901378	0.0732236	-0.00568114	0.20292	Predicted ORF in Assemblies 19, 20 and 21; transcription is repressed in response to alpha pheromone in SpiderM medium
orf19.3218	orf19.3218	-0.0092008	0.323372	-0.00512867	0.837297	0.00559435	0.338336	-0.0190634	0.059217	Putative multidrug resistance protein; upregulated by Efg1p
orf19.3219	orf19.3219	0.00369034	0.233812	0.00227397	0.698369	0.000584259	0.822728	0.00143095	0.382464	Predicted ORF in Assemblies 19, 20 and 21
orf19.3228	orf19.3228	0.0165138	0.031548	0.00595641	0.654736	0.00906224	0.142239	0.015485	0.059217	Predicted ORF in Assemblies 19, 20 and 21; mutation confers hypersensitivity to amphotericin B
orf19.3229	orf19.3229	-0.0298796	0.133097	-0.0708724	0.33522	-0.0948108	0.0363839	-0.137115	0.00805488	Predicted ORF in Assemblies 19, 20 and 21
orf19.323	orf19.323	0.00576073	0.520536	-0.00414776	0.818829	0.00776184	0.402241	0.00319929	0.88751	Predicted ORF in Assemblies 19, 20 and 21
orf19.3230	BOI2	-0.00421776	0.510643	0.0103198	0.563845	0.00832483	0.331534	-0.0053825	0.356957	Predicted ORF in Assemblies 19, 20 and 21; mutation confers hypersensitivity to toxic ergosterol analog
orf19.3231	CDC27	-0.00851771	0.494705	0.00759786	0.466703	0.0032012	0.559997	-0.000813761	0.929146	Predicted ORF in Assemblies 19, 20 and 21; periodic mRNA expression, peak at cell-cycle S/G2 phase
orf19.3233	orf19.3233	0.00619717	0.132391	0.000169965	0.971479	0.00328926	0.408568	0.001826	0.455383	Predicted ORF in Assemblies 19, 20 and 21
orf19.3239	CTF18	-0.0152592	0.397568	-0.0390956	0.182912	-0.0118914	0.360473	0.00643465	0.49141	Predicted ORF in Assemblies 19, 20 and 21; cell-cycle regulated periodic mRNA expression
orf19.3241	orf19.3241	0.00253069	0.688715	0.00421217	0.849953	-0.0137707	0.51693	0.00621041	0.780367	Predicted ORF in Assemblies 19, 20 and 21
orf19.3243	SRP54	-0.00603963	0.227997	-0.000474872	0.860475	-0.00129873	0.638677	-0.00179798	0.6855	Predicted ORF in Assemblies 19, 20 and 21; increased transcription in ssr1 homozygous null mutant
orf19.3245	orf19.3245	0.00495568	0.175539	0.000440805	0.965778	0.00552834	0.184137	0.00647108	0.260118	Predicted ORF in Assemblies 19, 20 and 21
orf19.3248	orf19.3248	0.00235855	0.717182	-0.00384394	0.716535	0.00170697	0.623714	0.00140548	0.415267	Predicted ORF in Assemblies 19, 20 and 21
orf19.3249	LAG1	0.00387502	0.590082	0.00264379	0.743386	0.00548198	0.390982	0.00960819	0.255266	Predicted ORF in Assemblies 19, 20 and 21; amphotericin B repressed
orf19.325	orf19.325	-0.00885344	0.391334	-0.00314442	0.8827	-0.00544739	0.69458	-0.00542809	0.617773	Putative protein of unknown function; heterozygous null mutant exhibits hypersensitivity to parnafungin and cordycepin in the C. albicans fitness test; predicted ORF in Assemblies 19, 20 and 21
orf19.3252	DAL81	0.0022792	0.614045	0.00025593	0.979468	0.0065627	0.163559	0.0109021	0.0273463	Predicted zinc-finger protein of unknown function; has similarity to S. cerevisiae Dal81p, which is a transcription factor involved in the regulation of nitrogen-degradation genes
orf19.3255	orf19.3255	0.00713838	0.296187	-0.00198046	0.815697	0.00644179	0.195202	0.00333274	0.631371	Transcription is regulated upon yeast-hyphal switch; possibly spurious ORF (Annotation Working Group prediction)
orf19.3256	SLN1	0.00800295	0.0405522	0.00319169	0.548754	0.00204374	0.553916	-0.00140109	0.806385	Histidine kinase involved in a two-component signaling pathway that regulates cell wall biosynthesis
orf19.326	orf19.326	-0.00144504	0.812481	-0.00256047	0.463482	6.26439e-05	0.985933	-0.00425118	0.145734	Predicted ORF in Assemblies 19, 20 and 21
orf19.3260	orf19.3260	0.00302623	0.79389	-0.00702681	0.452933	-0.00329589	0.847221	-0.00194593	0.936119	Predicted ORF in Assemblies 19, 20 and 21
orf19.3261	orf19.3261	-0.00132979	0.927242	-0.0116303	0.538531	-0.00670904	0.493459	0.00488249	0.499243	Predicted ORF in Assemblies 19, 20 and 21; possibly spurious ORF (Annotation Working Group prediction)
orf19.3263	orf19.3263	-0.00347876	0.432048	0.00697754	0.198707	0.000720192	0.861688	-0.00227003	0.480151	Predicted ORF in Assemblies 19, 20 and 21
orf19.3264	CCE1	0.00610797	0.475244	-0.00593829	0.826692	-0.00222405	0.699239	0.000230717	0.976362	Putative Holliday junction resolving enzyme; similar to S. cerevisiae Cce1p
orf19.3265	TRM1	0.00634174	0.465645	0.00923806	0.588798	-0.0126454	0.498472	0.0129941	0.705084	Protein described as an N2,N2-dimethylguanine tRNA methyltransferase; induced upon adherence to polystyrene
orf19.3266	orf19.3266	0.00787772	0.186184	0.00305764	0.757182	0.0075824	0.218125	0.00724287	0.292013	Predicted ORF in Assemblies 19, 20 and 21
orf19.3267	orf19.3267	-0.0743098	0.0855955	-0.0672722	0.0232259	-0.05764	0.0724746	-0.0777016	0.0964201	Predicted ORF in Assemblies 19, 20 and 21
orf19.3268	TMA19	-0.00320189	0.758796	0.00991222	0.0345847	-0.0066592	0.316836	0.00225594	0.491481	Ortholog of S. cerevisiae Tma19p (Ykl065cp)
orf19.3269	GSL2	0.000447113	0.932068	0.00889708	0.149127	-0.000388366	0.95321	0.00832879	0.0964201	Protein similar to beta-1,3-glucan synthase; 16 predicted membrane-spanning regions; transcription regulated by Nrg1p; very low gene expression in yeast-form and hyphal cells
orf19.3273	orf19.3273	0.00388354	0.490646	0.0104065	0.268976	0.00779851	0.171157	0.00600791	0.384034	Predicted ORF in Assemblies 19, 20 and 21
orf19.3277	orf19.3277	-0.0121709	0.445919	0.00395543	0.599126	0.00144619	0.874754	-0.00644763	0.501619	Predicted ORF in Assemblies 19, 20 and 21
orf19.3279	HYR4	-0.0133154	0.350425	0.00577368	0.630661	-0.00770802	0.331534	0.0081468	0.208296	Putative GPI-anchored protein of unknown function; transcription is negatively regulated by Rim101p; constitutive expression independent of MTL or white-opaque status
orf19.328	NPR2	-0.00254002	0.659592	-0.00401472	0.630456	-0.00729253	0.2507	0.00119552	0.927351	Predicted ORF in Assemblies 19, 20 and 21; induced during infection of murine kidney, compared to growth in vitro; has murine homolog
orf19.3280	orf19.3280	0.00548131	0.10201	0.00529654	0.287473	0.00136815	0.802401	0.000857978	0.72983	ORF Predicted by Annotation Working Group
orf19.3281	orf19.3281	0.00026553	0.954128	-0.000423677	0.972718	-0.00171828	0.779802	7.47995e-05	0.989626	Predicted ORF in Assemblies 19, 20 and 21
orf19.3284	orf19.3284	-0.0038944	0.658707	0.00770538	0.432999	0.00382495	0.338943	0.00228927	0.876618	ORF Predicted by Annotation Working Group
orf19.3286	orf19.3286	0.00424226	0.824627	0.000218149	0.993833	-0.0235333	0.207064	-0.00297738	0.78483	Predicted ORF in Assemblies 19, 20 and 21
orf19.3292	orf19.3292	0.00380678	0.620675	-0.00061891	0.952607	0.00771057	0.360473	0.00592117	0.197887	Predicted ORF in Assemblies 19, 20 and 21
orf19.3293	orf19.3293	-0.0286705	0.00979236	-0.0309134	0.011238	-0.0418177	0.00648391	-0.0413291	0.00780968	Predicted ORF in Assemblies 19, 20 and 21
orf19.3294	MBF1	-0.00393427	0.573796	0.0105027	0.252814	0.00599462	0.206626	-0.0139167	0.562183	Predicted ORF in Assemblies 19, 20 and 21; caspofungin repressed
orf19.3295	orf19.3295	-0.001981	0.674034	-0.00265485	0.813855	-0.0023595	0.684048	-0.00133309	0.73455	Predicted ORF in Assemblies 19, 20 and 21; possibly spurious ORF (Annotation Working Group prediction)
orf19.3298	CCH1	-0.069745	0.00570842	-0.0761192	0.00164873	-0.239102	0.283508	-0.0875944	0.0028612	Putative voltage-gated Ca2+ channel of the high affinity calcium uptake system; roles in thigmotropism, establishment of galvanotropism; transcription is regulated by Nrg1p and Mig1p
orf19.3302	orf19.3302	-0.0031186	0.5915	0.00116096	0.917149	0.000833326	0.891706	-0.000711446	0.910232	Predicted ORF in Assemblies 19, 20 and 21; transcription downregulated upon yeast-hyphal switch; transcriptionally activated by Mnl1p under weak acid stress
orf19.3303	orf19.3303	-0.000310934	0.956228	-0.00155672	0.828296	0.0023387	0.623868	-0.000429005	0.870815	Predicted ORF in Assemblies 19, 20 and 21
orf19.3304	orf19.3304	-0.0041146	0.764599	-0.00735418	0.529408	-0.00479603	0.763438	-0.00729477	0.416193	Predicted ORF in Assemblies 19, 20 and 21
orf19.3305	ZCF17	-0.0182791	0.11499	0.00498241	0.691181	-0.00458547	0.568975	-0.0120456	0.439792	Putative transcription factor with zinc cluster DNA-binding motif
orf19.3306	orf19.3306	0.00331048	0.591434	0.00360428	0.690505	0.00670651	0.186179	0.00727495	0.0360223	Predicted ORF in Assemblies 19, 20 and 21
orf19.3308	STB5	0.00388041	0.405402	0.000583657	0.952607	0.00113834	0.87272	0.00567112	0.425018	Putative transcription factor with zinc cluster DNA-binding motif; has similarity to S. cerevisiae Stb5p
orf19.3309	orf19.3309	0.00894265	0.258601	0.0127344	0.200328	0.00972023	0.229248	0.0151346	0.0337311	Predicted ORF in Assemblies 19, 20 and 21
orf19.3310	orf19.3310	0.00124625	0.86905	-0.00535296	0.673709	0.00259058	0.67156	0.00739398	0.20292	Predicted ORF in Assemblies 19, 20 and 21; possibly spurious ORF (Annotation Working Group prediction)
orf19.3312	orf19.3312	0.000767166	0.87023	0.00179347	0.757973	0.00254993	0.596325	0.00367513	0.369047	Predicted ORF in Assemblies 19, 20 and 21
orf19.3315	CTA9	-0.00888294	0.298967	-0.00148298	0.873665	-0.0149417	0.0952601	-0.00341198	0.437923	Protein induced during the mating process; activates transcription in 1-hybrid assay in S. cerevisiae
orf19.3317	orf19.3317	-0.00417842	0.550854	0.000380348	0.986488	-0.000868507	0.910874	0.0010763	0.769311	Predicted ORF in Assemblies 19, 20 and 21
orf19.3318	orf19.3318	0.00745096	0.301518	0.00441468	0.842196	0.0139882	0.0292588	0.00881973	0.143525	Predicted ORF in Assemblies 19, 20 and 21
orf19.3320	orf19.3320	-0.00349311	0.233816	-0.00980769	0.673987	-0.0206029	0.176413	-0.00287648	0.581118	Predicted ORF in Assemblies 19, 20 and 21; possibly spurious ORF (Annotation Working Group prediction)
orf19.3321	orf19.3321	-0.013057	0.292461	-0.0130951	0.383534	-0.0144234	0.115237	-0.00580283	0.623275	Predicted ORF in Assemblies 19, 20 and 21
orf19.3322	DUT1	0.00310227	0.722296	0.000932296	0.941871	0.00545222	0.398249	0.00278243	0.816273	dUTP pyrophosphatase; converts dUTP to dUMP and pyrophosphate; cell-cycle regulated if expressed in S. cerevisiae; upstream MluI and SCB transcription regulatory elements; induced by 17-beta-estradiol, ethynyl estradiol, macrophage
orf19.3323	orf19.3323	0.000957518	0.764599	0.00577754	0.309379	-0.00124162	0.831489	0.00221725	0.487474	Predicted ORF in Assemblies 19, 20 and 21; possibly spurious ORF (Annotation Working Group prediction)
orf19.3325	orf19.3325	0.0124313	0.287345	0.00239156	0.917149	0.0102201	0.0884617	0.000445252	0.963416	Protein described as glycogen synthesis initiator; regulated by Efg1p and Efh1p; Hog1p-downregulated; shows colony morphology-related gene regulation by Ssn6p; increased expression in response to prostaglandins
orf19.3325.3	RPS21B	-0.0858861	0.0117907	-0.152452	0.011238	-0.128082	0.0781407	-0.147841	0.0256576	Protein described as similar to ribosomal protein S21; regulated by Nrg1p, Tup1p; shows colony morphology-related gene regulation by Ssn6p; transcription is positively regulated by Tbf1p
orf19.3327	TRM2	0.000738555	0.813756	-0.000122139	0.964502	0.00172866	0.336537	0.00227104	0.415707	Predicted ORF in Assemblies 19, 20 and 21; decreased expression in response to prostaglandins
orf19.3328	orf19.3328	0.00551796	0.0802756	0.00322699	0.197906	0.0053776	0.197568	0.00367108	0.322725	Predicted ORF in Assemblies 19, 20 and 21; filament induced
orf19.3329	orf19.3329	-0.00366263	0.348815	0.00909485	0.435059	0.00267439	0.662153	-0.0108146	0.225983	Predicted ORF in Assemblies 19, 20 and 21
orf19.333	FCY2	-0.000637568	0.953088	-0.00372827	0.673709	0.00905535	0.100828	0.00562097	0.450909	Putative purine-cytosine permease of pyrimidine salvage; similar to S. cerevisiae Fcy2p; mutation associated with resistance to flucytosine in clinical isolates; transposon mutation affects filamentation; farnesol-upregulated in biofilm
orf19.3330	CRL1	0.0208858	0.035056	0.00592548	0.655749	0.00910531	0.435709	0.0134129	0.246532	Predicted GTPase of RHO family; CAAX motif geranylgeranylated; expression in S. cerevisiae causes dominant-negative inhibition of pheromone response
orf19.3330.3	POX18	0.00122662	0.871927	0.0134995	0.221149	0.00444359	0.448383	0.00129064	0.876618	Protein not essential for viability; similar to Candida maltosa Pox18p, which is a peroxisomal protein; Assembly 21 sequence was updated based on comparative genome analysis and new sequence data, and allelic orf19.10841 was reinstated
orf19.3331	ABC1	-0.0138209	0.0294179	-0.00764332	0.516824	0.00341498	0.67156	-0.0240129	0.0853819	Protein described as ubiquinol-cytochrome-c reductase; induced upon adherence to polystyrene
orf19.3332	orf19.3332	-0.00891392	0.77189	-0.0012452	0.926552	0.000589448	0.964818	0.0090628	0.415707	Predicted ORF in Assemblies 19, 20 and 21
orf19.3333	orf19.3333	-0.00138542	0.933308	-0.020479	0.268976	0.000819086	0.869738	0.00243017	0.62739	Predicted ORF in Assemblies 19, 20 and 21
orf19.3334	RPS21	0.00224085	0.811339	0.00160358	0.923083	0.0126075	0.209766	0.0117357	0.152063	Predicted ribosomal protein; genes encoding cytoplasmic ribosomal subunits, translation factors, and tRNA synthetases are downregulated upon phagocytosis by murine macrophage; transcription is positively regulated by Tbf1p
orf19.3335	orf19.3335	0.00899321	0.01091	-0.00176182	0.805878	0.00442436	0.400991	0.0154716	0.0189588	Predicted ORF in Assemblies 19, 20 and 21; shows colony morphology-related gene regulation by Ssn6p; repressed by nitric oxide
orf19.3336	orf19.3336	0.00877243	0.239786	0.0146425	0.23202	0.00968093	0.26789	-0.000495613	0.964376	Predicted ORF in Assemblies 19, 20 and 21; possibly spurious ORF (Annotation Working Group prediction)
orf19.3337	orf19.3337	0.00657169	0.48314	0.00817546	0.15191	0.0061421	0.300533	0.000187362	0.983748	Predicted ORF in Assemblies 19, 20 and 21
orf19.3338	orf19.3338	-0.00247427	0.594784	0.00123937	0.745607	0.00234311	0.553237	9.24667e-05	0.982376	Predicted ORF in Assemblies 19, 20 and 21
orf19.3341	orf19.3341	-0.000491231	0.929673	0.00102252	0.797255	-0.00237747	0.379794	0.000182912	0.940715	Putative tRNA-Arg synthetase; essential; S. cerevisiae ortholog is essential; genes encoding ribosomal subunits, translation factors, and tRNA synthetases are downregulated upon phagocytosis by murine macrophage
orf19.3342	orf19.3342	-0.000390781	0.948699	0.00310808	0.320732	0.00280671	0.309688	0.00437162	0.405605	Predicted ORF in Assemblies 19, 20 and 21
orf19.3344	VPS17	0.00247797	0.601129	-0.0074199	0.384898	-0.00145323	0.856729	0.00385737	0.500151	Predicted ORF in Assemblies 19, 20 and 21; fungal-specific (no human or murine homolog)
orf19.3345	SIZ1	-0.0424562	0.233812	-0.0105185	0.784581	-0.0362207	0.01017	-0.0106161	0.811515	Protein of unknown function; transcription is negatively regulated by Rim101p
orf19.3349	orf19.3349	0.00295569	0.537779	0.00659717	0.0848881	0.00327863	0.35604	0.00160732	0.728279	Putative protein of unknown function; heterozygous null mutant exhibits resistance to parnafungin in the C. albicans fitness test; predicted ORF in Assemblies 19, 20 and 21
orf19.3352	orf19.3352	0.00279637	0.625349	0.0102439	0.15191	0.00651529	0.0376984	0.00377638	0.55801	Predicted ORF in Assemblies 19, 20 and 21
orf19.3353	orf19.3353	-0.0033092	0.691657	-0.0139859	0.5198	0.00303995	0.667262	0.000551271	0.950705	Protein described as similar to a mitochondrial complex I intermediate-associated protein; fluconazole-downregulated
orf19.3355	ISN1	-0.0702508	0.00484954	-0.133378	0.00679466	-0.0847491	0.00412949	-0.107459	0.000459236	Putative inosine 5'-monophosphate 5'-nucleotidase; fungal-specific (no human or murine homolog)
orf19.336	YAH1	0.0113172	0.0297809	0.00395561	0.785589	0.00280683	0.479973	0.0134619	0.0257618	Similar to oxidoreductases; transcriptionally regulated by iron; expression greater in high iron
orf19.3360	orf19.3360	-0.0135988	0.0833148	-0.00205059	0.671444	-0.00260585	0.82073	-0.00512151	0.618624	Predicted ORF in Assemblies 19, 20 and 21; possibly spurious ORF (Annotation Working Group prediction)
orf19.3362	orf19.3362	0.00674461	0.022933	0.00290183	0.561067	0.00127928	0.770482	0.00630409	0.0258257	Predicted ORF in Assemblies 19, 20 and 21
orf19.3363	VTC4	-0.000290804	0.973668	0.00555656	0.660968	0.000857587	0.869859	0.00858126	0.0649357	Protein described as polyphosphate synthetase; decreased expression in hyphae compared to yeast-form cells; fungal-specific (no human or murine homolog); virulence-group-correlated expression
orf19.3364	orf19.3364	-0.213467	0.0823577	-0.238136	0.0100583	-0.144896	0.00553821	-0.217282	0.0129086	Predicted ORF in Assemblies 19, 20 and 21; possibly spurious ORF (Annotation Working Group prediction)
orf19.3365	DAO2	0.00638946	0.166323	-0.00186185	0.92633	-0.00252538	0.743321	-0.00114746	0.847714	Putative D-amino acid oxidase
orf19.3368	orf19.3368	0.00455425	0.244547	0.00972313	0.199291	-0.000635475	0.905483	-0.00248745	0.369047	Predicted ORF in Assemblies 19, 20 and 21
orf19.337	orf19.337	-0.00218958	0.579474	0.00135577	0.886154	-0.00146257	0.775074	6.69669e-05	0.993966	Predicted ORF in Assemblies 19, 20 and 21
orf19.3370	DOT4	0.00328162	0.686975	-0.00182857	0.857097	0.00994131	0.0719615	0.00457432	0.382464	Protein similar to ubiquitin C-terminal hydrolase; localizes to cell surface of hyphal cells, but not yeast-form cells; repressed upon high-level peroxide stress
orf19.3371	orf19.3371	0.00641069	0.167858	0.00799025	0.318604	0.0045131	0.103141	0.00808374	0.157766	Predicted ORF in Assemblies 19, 20 and 21
orf19.3373	orf19.3373	0.000885387	0.916743	-0.00492179	0.584898	-0.000523069	0.923632	0.00117158	0.909371	Putative protein of unknown function, transcription is upregulated in clinical isolates from HIV+ patients with oral candidiasis; predicted ORF in Assemblies 19, 20 and 21
orf19.3374	ECE1	0.000654135	0.929673	0.00666797	0.129733	0.00417695	0.395606	0.00435771	0.25613	Protein comprising eight 34-residue repeats; hyphal-specific expression increases with extent of elongation of the cell; regulated by Rfg1p, Nrg1p, Tup1p, Cph1p, Efg1p, Hog1p, farnesol, phagocytosis; may contribute to biofilm formation
orf19.3376	orf19.3376	-0.00741449	0.618695	0.00525498	0.766471	-0.00656335	0.558325	-0.0153276	0.177652	Predicted ORF in Assemblies 19, 20 and 21
orf19.3378	orf19.3378	-0.00184	0.852999	-0.000580985	0.974389	0.00570599	0.358391	0.0130404	0.113836	Predicted ORF in Assemblies 19, 20 and 21; regulated by Tsa1p, Tsa1Bp in minimal media at 37 deg
orf19.339	NDE1	-0.00622147	0.433246	0.00252767	0.536222	-0.000803733	0.954906	0.00442462	0.468094	Putative NADH dehydrogenase that could act alternatively to complex I in respiration; caspofungin repressed; fungal-specific (no human or murine homolog); transcription is upregulated in both intermediate and mature biofilms
orf19.3392	DOG1	-0.0476618	0.0105015	-0.0523827	0.0430823	-0.0214766	0.0986619	-0.027079	0.170874	Putative 2-deoxyglucose-6-phosphatase; haloacid dehalogenase hydrolase/phosphatase superfamily; similar to S. cerevisiae Dog1p, Dog2p, Hor1p, and Rhr2p; regulated by Nrg1p, Tup1p
orf19.3393	orf19.3393	0.0107926	0.137412	-0.0206738	0.129733	0.00638368	0.396677	-0.0091602	0.691382	Putative DEAD-box helicase
orf19.3394	orf19.3394	-0.0226927	0.0986895	-0.0746338	0.185559	-0.0268858	0.115237	-0.0320393	0.177514	Predicted ORF in Assemblies 19, 20 and 21; transcription is induced in response to alpha pheromone in SpiderM medium
orf19.3396	HCH1	0.00786608	0.230402	0.00628148	0.832682	0.00120589	0.920328	0.00580872	0.605487	Protein not essential for viability; regulated by Gcn4p; induced in response to amino acid starvation (3-aminotriazole treatment); similar to S. cerevisiae Hch1p, which is a regulator of heat shock protein Hsp90p
orf19.3399	orf19.3399	-0.0231895	0.0941447	-0.0270749	0.301548	0.00530267	0.526613	-0.0100839	0.354279	Predicted ORF in Assemblies 19, 20 and 21
orf19.340	orf19.340	0.00112639	0.752595	0.00287445	0.828033	0.000643808	0.904938	0.0024036	0.693464	Predicted ORF in Assemblies 19, 20 and 21
orf19.3400	COQ3	0.00911198	0.258601	0.00795438	0.676244	0.00911356	0.300761	-0.00474785	0.662299	Protein described as having role in coenzyme Q biosynthesis; transcriptionally induced by interaction with macrophage
orf19.3401	CTA1	0.0282831	0.140617	-0.00904872	0.799679	-0.0138645	0.560427	0.0146439	0.598183	Protein similar to S. cerevisiae Mos10p, which affects S. cerevisiae filamentous growth; activates transcription in 1-hybrid assay in S. cerevisiae; protein levels increase under weak acid stress; nonessential
orf19.3402	FPG1	0.0105294	0.0198105	-0.00901812	0.268938	0.00601435	0.160468	-0.00499748	0.652591	Formamidopyrimidine DNA glycosylase, involved in repair of gamma-irradiated DNA
orf19.3404	orf19.3404	0.00346084	0.655369	-0.0209215	0.0225172	0.00467704	0.565969	-0.000847132	0.917672	Decreased transcription is observed upon fluphenazine treatment
orf19.3405	ZCF18	0.00356971	0.273357	0.00342989	0.319998	0.00189232	0.443837	-0.00189649	0.588114	Putative transcription factor with zinc finger DNA-binding motif; heterozygous null mutant displays sensitivity to virgineone; possibly spurious ORF (Annotation Working Group prediction)
orf19.3406	orf19.3406	-0.0297826	0.314846	-0.0901744	0.131269	0.00425475	0.794089	-0.0224112	0.285832	Predicted ORF in Assemblies 19, 20 and 21; member of conserved Mcm1p regulon
orf19.3407	orf19.3407	0.00530744	0.471786	-0.000336812	0.969624	0.00925989	0.183955	0.00837072	0.20292	Putative transcription factor with zinc finger DNA-binding motif
orf19.341	orf19.341	-0.013671	0.175562	-0.00694537	0.656809	-0.00987497	0.418573	-0.00325457	0.894692	Putative spermidine export pump; fungal-specific (no human or murine homolog)
orf19.3413	FGR37	0.0100778	0.157077	0.00427575	0.791433	0.00831671	0.154952	-0.00181842	0.856696	Protein lacking an ortholog in S. cerevisiae; transposon mutation affects filamentous growth
orf19.3415	PTK2	0.00879487	0.332561	-0.0138429	0.253296	0.00354733	0.673415	-0.00987132	0.476639	Putative protein kinase of polyamine import; mutation confers hypersensitivity to high concentrations of tunicamycin; upregulated in biofilm
orf19.3415.1	RPL32	-0.11634	0.00592703	-0.101956	0.0225172	-0.198087	0.0107892	-0.11999	0.00295215	Predicted ribosomal protein
orf19.3417	ACF2	0.00413306	0.264799	0.00261257	0.460707	-0.000997704	0.839438	0.00240074	0.221648	Putative endo-1,3-beta-glucanase; fungal-specific (no human or murine homolog)
orf19.3425	orf19.3425	0.0100616	0.21884	0.00081968	0.922585	0.00523189	0.085945	0.00661893	0.266449	Predicted ORF in Assemblies 19, 20 and 21
orf19.3429	FGR47	-0.00831571	0.187615	0.002272	0.737591	0.00379946	0.472452	0.00398873	0.694095	Protein lacking an ortholog in S. cerevisiae; transposon mutation affects filamentous growth
orf19.3430	orf19.3430	-0.00204002	0.855045	0.00428199	0.716994	0.00450628	0.58806	-0.00288581	0.78483	Predicted ORF in Assemblies 19, 20 and 21; possibly spurious ORF (Annotation Working Group prediction); physically interacts with TAP-tagged Nop1p
orf19.3431	orf19.3431	-0.000273554	0.929673	0.00171826	0.620745	0.00351551	0.107576	0.00140506	0.530866	Predicted ORF in Assemblies 19, 20 and 21
orf19.3432	orf19.3432	0.00703085	0.175539	0.00791499	0.221149	0.00902159	0.215477	0.00657366	0.369133	Predicted membrane transporter, member of the drug:proton antiporter (12 spanner) (DHA1) family, major facilitator superfamily (MFS); induced by nitric oxide
orf19.3436	orf19.3436	-0.00397198	0.380286	-0.00340655	0.681438	-0.0138346	0.358391	-0.0054016	0.598606	Predicted ORF in Assemblies 19, 20 and 21; macrophage-induced gene
orf19.3437	orf19.3437	-0.038485	0.0277151	-0.0738613	0.266583	-0.0609533	0.00205613	-0.123379	0.000459236	Predicted ORF in Assemblies 19, 20 and 21
orf19.3438	orf19.3438	0.0119247	0.260786	0.00866615	0.50082	-0.00182826	0.864086	0.00508711	0.633746	Predicted ORF in Assemblies 19, 20 and 21
orf19.3439	orf19.3439	0.00220755	0.703828	0.00213986	0.592704	0.00515584	0.161932	0.00633194	0.313544	Predicted ORF in Assemblies 19, 20 and 21; greater mRNA abundance observed in a cyr1 homozygous null mutant than in wild type
orf19.344	orf19.344	0.00259193	0.64651	-0.010829	0.682518	0.00238466	0.553916	0.00559295	0.306903	Predicted ORF in Assemblies 19, 20 and 21; increased transcription is observed upon fluphenazine treatment or in an azole-resistant strain that overexpresses CDR1 and CDR2; possibly transcriptionally regulated by Tac1p; possibly spurious ORF (Annotation Working Group prediction)
orf19.3440	FRP5	-0.00534776	0.347886	0.00528814	0.646252	-0.00766675	0.346907	0.0026353	0.768099	Predicted ORF in Assemblies 19, 20 and 21; flucytosine repressed
orf19.3442	orf19.3442	0.00329645	0.383394	0.00306893	0.67709	0.00434986	0.223482	0.00137742	0.742906	Predicted ORF in Assemblies 19, 20 and 21
orf19.3444	orf19.3444	0.00155758	0.920114	0.00865957	0.572646	0.010779	0.0978196	0.00812969	0.213852	Predicted membrane transporter, member of the drug:proton antiporter (14 spanner) (DHA2) family, major facilitator superfamily (MFS)
orf19.3445	HOC1	0.000474036	0.896308	0.00114237	0.664077	-0.00292021	0.220049	0.000480025	0.909319	Protein with similarity to mannosyltransferases; similar to S. cerevisiae Hoc1p and C. albicans Och1p
orf19.3446	orf19.3446	0.00467642	0.501119	-0.00235726	0.560676	-0.00574529	0.340447	-0.00406483	0.547889	Predicted ORF in Assemblies 19, 20 and 21
orf19.3448	orf19.3448	-0.000971579	0.903614	0.000295927	0.982853	-0.00532797	0.702909	0.000548477	0.955064	Predicted ORF in Assemblies 19, 20 and 21; ketoconazole-repressed; possibly spurious ORF (Annotation Working Group prediction)
orf19.3449	orf19.3449	0.00285313	0.624999	-0.0217727	0.182416	0.00289752	0.284245	-0.00486784	0.592901	Predicted ORF in Assemblies 19, 20 and 21
orf19.3450.1	orf19.3450.1	0.00104169	0.712058	0.00146981	0.753596	-0.00400036	0.359958	-0.000618211	0.893186	Predicted ORF in Assemblies 19, 20 and 21
orf19.3455	orf19.3455	0.00939475	0.17386	-0.0139915	0.198707	0.00439792	0.288184	-0.00326412	0.302666	Predicted ORF in Assemblies 19, 20 and 21
orf19.3456	orf19.3456	0.00923701	0.105833	0.00572576	0.397231	0.00922731	0.193993	0.00745421	0.225276	Predicted ORF in Assemblies 19, 20 and 21
orf19.3457	SWD3	0.00121385	0.847476	0.0108048	0.418143	0.00066501	0.92448	0.000203928	0.988716	Predicted ORF in Assemblies 19, 20 and 21
orf19.3462	SAR1	9.57487e-05	0.982494	-0.000556185	0.892387	0.0051935	0.0779054	0.00202261	0.468094	Functional homolog of S. cerevisiae Sar1p, which is required for ER-to-Golgi protein transport; binds GTP; similar to small GTPase superfamily proteins; gene has intron
orf19.3463	orf19.3463	-0.00143875	0.855623	0.00494703	0.444872	0.00659631	0.102562	0.00486655	0.511294	Predicted ORF in Assemblies 19, 20 and 21
orf19.3465	RPL10A	-0.00296907	0.520187	-0.000128636	0.98075	0.000708513	0.834723	0.00203212	0.792306	Predicted ribosomal protein; genes encoding cytoplasmic ribosomal subunits, translation factors, and tRNA synthetases are downregulated upon phagocytosis by murine macrophage
orf19.3467	orf19.3467	-0.0301457	0.181052	-0.0643385	0.320301	-0.0699255	0.0831067	-0.035349	0.024801	Predicted ORF in Assemblies 19, 20 and 21
orf19.3468	ALG11	-0.0239428	0.0158876	-0.0512767	0.337879	-0.0114917	0.284517	-0.0402201	0.160821	Protein with similarity to mannosyltransferases
orf19.3469	orf19.3469	-0.0040125	0.668046	-0.012553	0.473669	-0.00865434	0.588887	0.00468131	0.840548	Predicted ORF in Assemblies 19, 20 and 21; greater mRNA abundance observed in a cyr1 homozygous null mutant than in wild type
orf19.347	RSN1	0.0086896	0.194834	0.00470017	0.0893006	0.00176985	0.644108	0.00571748	0.157632	Protein induced during the mating process
orf19.3470	orf19.3470	0.000258382	0.961599	0.00164272	0.855637	-0.00382391	0.53529	-0.0248749	0.244794	Putative flavodoxin; similar to S. cerevisiae Ypl207p; predicted Kex2p substrate
orf19.3471	orf19.3471	-0.00627284	0.135475	0.00100449	0.91776	-0.0050267	0.235096	0.00272556	0.798702	Predicted ORF in Assemblies 19, 20 and 21
orf19.3473	orf19.3473	-0.00737946	0.751658	0.00498722	0.716178	0.00560526	0.584774	0.00597501	0.626229	Predicted ORF in Assemblies 19, 20 and 21
orf19.3474	IPL1	-0.0041872	0.588813	-0.0269994	0.309715	-0.0057185	0.35604	-0.0274359	0.0342059	Predicted ORF in Assemblies 19, 20 and 21; induced during planktonic growth
orf19.3477	orf19.3477	0.000707958	0.959501	-0.00306709	0.856409	-0.0134956	0.0291488	-0.0239498	0.295689	Predicted ORF in Assemblies 19, 20 and 21
orf19.3478	NIP7	-0.0028071	0.273357	-0.00173838	0.721891	-0.00247661	0.605542	0.00318185	0.788703	Protein described as a nucleolar protein with role in ribosomal assembly; hyphal induced
orf19.348	SKN2	0.00624279	0.0425003	0.00096652	0.8634	-0.00171701	0.595717	0.00407771	0.148889	Protein with a potential role in beta-1,6 glucan biosynthesis; has similarity to Kre6p and Skn1p; predicted ORF in Assemblies 19, 20 and 21
orf19.3480	orf19.3480	1.11761e-05	0.997833	-0.00035105	0.962111	-0.00397331	0.499599	0.00397615	0.233754	Predicted ORF in Assemblies 19, 20 and 21
orf19.3481	orf19.3481	-0.00146266	0.792511	-0.00144345	0.855637	-0.00895915	0.154503	-0.00890382	0.254473	Putative protein of unknown function, transcription is activated in the presence of elevated CO2; predicted ORF in Assemblies 19, 20 and 21
orf19.3483	orf19.3483	0.00961476	0.175562	0.00354496	0.703378	0.00762765	0.0932015	0.00332527	0.548801	Predicted ORF in Assemblies 19, 20 and 21; Plc1p-regulated
orf19.349	orf19.349	0.00317337	0.324025	0.00310106	0.307405	3.48414e-05	0.991648	-0.0048326	0.55814	Predicted ORF in Assemblies 19, 20 and 21
orf19.3490	FGR6-4	0.00139371	0.89033	-4.16425e-05	0.996395	0.000125988	0.991598	0.00407333	0.777667	Protein lacking an ortholog in S. cerevisiae; member of a family encoded by FGR6-related genes in the RB2 repeat sequence; transposon mutation affects filamentous growth
orf19.3496	orf19.3496	0.0031836	0.431433	0.008069	0.147097	0.00450867	0.284517	0.0022567	0.506465	Predicted ORF in Assemblies 19, 20 and 21
orf19.3498	orf19.3498	0.00376104	0.210998	0.00246546	0.298897	0.000110329	0.96624	0.00151916	0.661942	Predicted ORF in Assemblies 19, 20 and 21; predicted enzyme of arginine degradation
orf19.3499	orf19.3499	-0.000497809	0.94936	-0.00300104	0.719179	-0.00161518	0.723383	0.00204786	0.867783	Predicted ORF in Assemblies 19, 20 and 21; regulated by Tsa1p, Tsa1Bp under H2O2 stress conditions; transcriptionally activated by Mnl1p under weak acid stress
orf19.35	orf19.35	-0.000140398	0.974784	-0.00037823	0.969	9.1311e-05	0.969197	0.00632076	0.487474	Predicted ORF in Assemblies 19, 20 and 21
orf19.350	PRE9	0.00495887	0.454379	0.00802206	0.361425	0.00759808	0.456862	-0.00125497	0.926558	Alpha3 (C9) subunit of the 20S proteasome; transcription is regulated by Mig1p
orf19.3504	RPL23A	-0.0358329	0.20356	-0.0097829	0.715336	0.0144324	0.12572	0.00427422	0.796194	Putative ribosomal protein; genes encoding cytoplasmic ribosomal subunits, translation factors, and tRNA synthetases are downregulated upon phagocytosis by murine macrophage
orf19.3506	DBR1	-0.00218332	0.790135	-0.00964353	0.646133	0.00526875	0.57274	0.00623423	0.468631	Debranchase; homozygous mutant accumulates lariat intermediates of mRNA splicing
orf19.351	orf19.351	0.0105328	0.504026	0.0026663	0.959782	0.0180756	0.197568	0.00596364	0.772076	Predicted ORF in Assemblies 19, 20 and 21
orf19.3512	orf19.3512	-0.000258538	0.973414	0.00937093	0.467648	-0.00905953	0.415114	-0.0200788	0.14363	Predicted ORF in Assemblies 19, 20 and 21
orf19.3515	orf19.3515	0.0119273	0.249408	0.00289194	0.873665	0.00902972	0.373896	0.00804319	0.46882	Putative 3-hydroxyanthranilic acid dioxygenase, involved in NAD biosynthesis
orf19.3516	orf19.3516	-0.015316	0.0249887	-0.00026194	0.980863	-0.00135646	0.761375	-0.00118616	0.824308	Predicted ORF in Assemblies 19, 20 and 21
orf19.3517	orf19.3517	0.00726897	0.298978	0.00651107	0.548831	0.000417363	0.950671	0.00983918	0.0920479	Predicted ORF in Assemblies 19, 20 and 21
orf19.3518	orf19.3518	0.00987557	0.226627	-0.000520755	0.917149	0.00487898	0.363992	0.00224203	0.73455	Predicted ORF in Assemblies 19, 20 and 21
orf19.3519	SUA72	-0.0478551	0.132434	-0.0836314	0.0161836	-0.068261	0.358391	-0.0763328	0.0435002	Predicted transcriptional regulator; induced during planktonic growth, whereas related SUA71 is downregulated
orf19.352	orf19.352	-0.0533828	0.00196037	-0.0368932	0.0242369	-0.0675609	0.1685	-0.0338996	0.177652	Predicted ORF in Assemblies 19, 20 and 21
orf19.3521	ARH2	0.00792308	0.152201	0.00951379	0.120082	0.0137237	0.0184221	0.00256301	0.541813	Predicted ORF in Assemblies 19, 20 and 21
orf19.3522	orf19.3522	-0.000608939	0.944528	0.00121166	0.936798	0.000556255	0.931409	0.00145398	0.898896	Predicted ORF in Assemblies 19, 20 and 21; transcription is downregulated in response to treatment with ciclopirox olamine
orf19.3523	CRK1	-0.00883858	0.48314	0.00281576	0.817312	-0.0100889	0.388082	-0.0138846	0.152265	Protein kinase of the Cdc2 kinase subfamily involved in hyphal development and virulence; promotes hyphal development independently of Cph1 and Efg1; functionally complements pheromone hypersensitivity of S. cerevisiae sgv1 mutant
orf19.3526	ITR1	0.00643968	0.11947	-0.00252324	0.890949	-0.00652683	0.241009	0.00507592	0.231896	Inositol transporter required for uptake of exogenous inositol; major facilitator superfamily; 12 probable transmembrane motifs; expressed in rich medium with 2% glucose; fluconazole, caspofungin downregulated
orf19.3528	orf19.3528	0.000158496	0.989954	-0.000469405	0.960344	0.00121786	0.834723	0.00300702	0.405605	Predicted ORF in Assemblies 19, 20 and 21
orf19.3529	ABP2	0.00117854	0.726471	0.000703932	0.883177	0.00681596	0.178217	0.00110465	0.79533	Protein of unknown function; induced in response to alpha pheromone in SpiderM medium
orf19.353	ULP1	-0.000251229	0.974465	0.0017138	0.785516	0.00473136	0.261074	0.00483784	0.397653	Putative SUMO deconjugation enzyme that cleaves the small ubiquitin-like modifier (SUMO) off proteins
orf19.3530	CKA2	-0.309196	0.00219837	-0.200678	0.0544029	-0.192386	0.0933231	-0.1688	0.210482	Catalytic subunit (alpha-subunit) of protein kinase CK2; interaction with calcineurin pathway to affect fluconazole sensitivity; not essential for viability; synthetically lethal with CKA1; similar to S. cerevisiae Cka2p
orf19.3531	orf19.3531	0.000468053	0.90854	0.00398488	0.221149	-0.00179379	0.626323	0.00880384	0.192704	Predicted ORF in Assemblies 19, 20 and 21
orf19.3532	MRPL10	0.00245673	0.317712	0.00152767	0.735442	0.00165223	0.564181	0.00450244	0.236458	Predicted ORF in Assemblies 19, 20 and 21; shows colony morphology-related gene regulation by Ssn6p
orf19.3533	orf19.3533	0.00239908	0.854308	0.00227828	0.794943	0.000726995	0.913134	0.00142263	0.930664	Predicted ORF in Assemblies 19, 20 and 21
orf19.3534	RHO3	-0.00121894	0.78878	0.000634214	0.964502	0.00280098	0.347363	0.00277907	0.637041	Putative Rho family GTPase; possible substrate of protein farnesyltransferase and geranylgeranyltransferase type I; greater transcription in hyphal form than yeast form
orf19.3536	orf19.3536	0.0049175	0.563187	0.00497341	0.637731	0.00559672	0.465084	0.00756947	0.177652	Predicted ORF in Assemblies 19, 20 and 21
orf19.3537	orf19.3537	-0.00738977	0.0310503	0.000393559	0.947463	-0.00176808	0.57037	-0.000856729	0.856917	Predicted ORF in Assemblies 19, 20 and 21; regulated by Tsa1p, Tsa1Bp in minimal media at 37 deg
orf19.3539	orf19.3539	-0.00168172	0.752595	0.00563477	0.272191	0.0065244	0.331029	0.00148858	0.838714	Predicted ORF in Assemblies 19, 20 and 21
orf19.354	orf19.354	-0.00687474	0.38994	-0.011549	0.264189	0.00167662	0.798921	-0.00141891	0.914333	Predicted ORF in Assemblies 19, 20 and 21
orf19.3540	MAK5	0.00220944	0.429328	0.00328452	0.361486	0.00324004	0.449967	0.00339905	0.436235	Predicted ORF in Assemblies 19, 20 and 21; oxidative stress-repressed via Cap1p; decreased expression in response to prostaglandins
orf19.3541	ERF1	-0.00748114	0.196658	-0.0059192	0.499856	-0.000679504	0.905483	-0.00416358	0.0842617	Putative translation release factor 1, which interacts with stop codons and promotes release of nascent peptides from ribosomes
orf19.3542	LEM3	0.00132182	0.752595	0.000945074	0.903803	0.00424065	0.400991	0.000499272	0.848563	Predicted ORF in Assemblies 19, 20 and 21; mutation causes increased resistance to miltefosine
orf19.3543	orf19.3543	0.00625751	0.0859371	-0.00791661	0.436532	-0.0110497	0.300797	-0.000973726	0.891925	Predicted ORF in Assemblies 19, 20 and 21; possibly spurious ORF (Annotation Working Group prediction)
orf19.3544	orf19.3544	0.0230766	0.035056	0.0103005	0.443774	0.0165774	0.0933231	0.012218	0.287372	Predicted ORF in Assemblies 19, 20 and 21
orf19.3545	orf19.3545	0.00063971	0.974126	-0.0293576	0.286299	0.00814132	0.465084	0.013174	0.49139	Predicted ORF in Assemblies 19, 20 and 21
orf19.3547	orf19.3547	-0.000246869	0.941588	-0.00210163	0.851176	-0.0011478	0.737064	0.00493033	0.572482	Predicted ORF in Assemblies 19, 20 and 21
orf19.3548	orf19.3548	0.0076115	0.352112	0.00410751	0.788771	0.00321307	0.52492	-0.00450058	0.598587	Predicted ORF in Assemblies 19, 20 and 21
orf19.3548.1	WH11	0.010751	0.0384567	0.00496896	0.229786	0.00606041	0.226626	0.00886168	0.121154	Cytoplasmic protein expressed specifically in white phase yeast-form cells; expression in opaque cells increases virulence and frequency of opaque-to-white switching; null mutant shows wild-type switching; similar to S. cerevisiae Hsp12p
orf19.3549	CDC21	0.00647733	0.188985	-0.00256764	0.855099	0.00192116	0.585637	0.006197	0.439792	Predicted ORF in Assemblies 19, 20 and 21; flucytosine induced; transcription is downregulated in both intermediate and mature biofilms
orf19.3552	orf19.3552	-0.00620727	0.279494	-0.00841709	0.262729	-0.0102986	0.165618	-0.0124008	0.472353	Predicted ORF in Assemblies 19, 20 and 21
orf19.3553	RPF2	-0.0220471	0.173436	-0.00853745	0.546162	0.00361009	0.674753	-0.0122946	0.514254	Predicted ORF in Assemblies 19, 20 and 21; mutation confers hypersensitivity to 5-fluorocytosine (5-FC), 5-fluorouracil (5-FU), and tubercidin (7-deazaadenosine)
orf19.3555	orf19.3555	-0.000215666	0.967111	0.0134941	0.0333526	0.0029318	0.675203	0.00792096	0.384024	Predicted ORF in Assemblies 19, 20 and 21
orf19.3556	orf19.3556	-0.0258181	0.00570842	0.00648458	0.465641	-0.0197194	0.0755859	-0.0704194	0.0188256	Predicted ORF in Assemblies 19, 20 and 21
orf19.3557	orf19.3557	0.00982271	0.100785	-0.0145262	0.259914	0.0105051	0.155647	0.00403275	0.658733	Predicted ORF in Assemblies 19, 20 and 21
orf19.3559	orf19.3559	-0.0117842	0.623837	-0.0415534	0.318499	-0.0103102	0.593373	-0.0312433	0.101782	Predicted ORF in Assemblies 19, 20 and 21
orf19.356	GTT13	-0.00259828	0.677912	0.0112377	0.229786	-0.00354971	0.748831	0.00425946	0.705084	Predicted ORF in Assemblies 19, 20 and 21; opaque-specific transcription; transcription is repressed in response to alpha pheromone in SpiderM medium
orf19.3561	CDC7	0.0104976	0.0464824	0.00976889	0.198707	0.00265899	0.786155	0.00929066	0.117647	Predicted ORF in Assemblies 19, 20 and 21; cell-cycle regulated periodic mRNA expression; S. cerevisiae ortholog is not cell-cycle regulated
orf19.3563	orf19.3563	-0.00343394	0.519568	0.000199002	0.975404	-0.00135875	0.791867	-0.00515692	0.413252	Protein not essential for viability
orf19.3564	RPC40	0.0176311	0.00956309	0.0183672	0.0485693	0.0176366	0.042084	-0.00995324	0.623129	Predicted ORF in Assemblies 19, 20 and 21; protein level decreased in stationary phase cultures
orf19.3565	orf19.3565	0.00318947	0.843305	-0.0158716	0.198707	0.00296065	0.764246	0.00701486	0.341079	Predicted ORF in Assemblies 19, 20 and 21
orf19.3567	BIO32	0.00230574	0.688547	-0.00138523	0.94661	0.00342407	0.595717	0.0104792	0.177514	Predicted ORF in Assemblies 19, 20 and 21; induced during planktonic growth
orf19.3568	RXT3	-0.0308502	0.0123118	-0.0667932	0.0467541	-0.0134329	0.144207	-0.0433252	0.0235071	Predicted ORF in Assemblies 19, 20 and 21
orf19.3569	orf19.3569	0.000312019	0.890357	0.00379059	0.38113	0.00304657	0.329341	0.00170207	0.606289	Predicted ORF in Assemblies 19, 20 and 21; constitutive expression independent of MTL or white-opaque status
orf19.3571	orf19.3571	0.0142097	0.0758419	0.00586427	0.536222	0.0105828	0.177327	0.00826555	0.118755	Predicted ORF in Assemblies 19, 20 and 21
orf19.3573	orf19.3573	0.00644467	0.251259	0.00155957	0.818829	0.00747772	0.274012	-0.00114378	0.929146	Predicted ORF in Assemblies 19, 20 and 21
orf19.3574	orf19.3574	0.0025748	0.696009	0.00173713	0.828033	0.00175334	0.652718	0.00696555	0.535378	Predicted ORF in Assemblies 19, 20 and 21
orf19.3577	COQ5	-0.00228375	0.774935	-0.000328245	0.988648	0.0140937	0.0320418	-0.00296706	0.745071	Protein described as methyltransferase of ubiquinone biosynthesis; regulated by Gcn4p; repressed in response to amino acid starvation (3-aminotriazole treatment); induced upon adherence to polystyrene
orf19.3577.1	orf19.3577.1	0.00287071	0.302208	0.000773575	0.848028	0.00176799	0.607206	0.00298232	0.416193	ORF Predicted by Annotation Working Group
orf19.3578	orf19.3578	-0.00281152	0.647794	0.00928548	0.1464	0.00517838	0.267197	0.00808226	0.279662	Predicted ORF in Assemblies 19, 20 and 21
orf19.3579	ATP4	-0.179936	0.20651	-0.168433	0.321291	-0.0338004	0.439013	-0.110975	0.398039	Predicted ORF in Assemblies 19, 20 and 21; macrophage/pseudohyphal-induced
orf19.3582	orf19.3582	0.00408733	0.365558	0.000581168	0.92938	0.00397035	0.263872	0.00482138	0.291939	Predicted ORF in Assemblies 19, 20 and 21
orf19.3583	orf19.3583	0.00775052	0.17402	0.00712753	0.309715	0.00943111	0.178217	0.00762596	0.412903	Predicted ORF in Assemblies 19, 20 and 21
orf19.3592	JEM1	0.00105001	0.916743	0.00391509	0.885256	-0.00278884	0.720452	-0.00973279	0.548801	Functional homolog of S. cerevisiae Jem1p, which acts with Scj1p and Kar2p (BiP) in protein folding and ER-associated degradation of misfolded proteins, and also has a role in karyogamy; has J domain and 4 tetratricopeptide repeats
orf19.3593	RPT6	0.00503227	0.603951	0.00333725	0.88417	0.00687434	0.284677	0.0174929	0.093696	Predicted ORF in Assemblies 19, 20 and 21; transcription is regulated by Mig1p; regulated by Gcn2p and Gcn4p
orf19.3599	TIF4631	-0.0132071	0.204793	0.00770353	0.587542	-0.0053394	0.450224	-0.0104175	0.295091	Putative translation initiation factor eIF4G; overexpression causes hyperfilamentation; hyphal- and macrophage-induced; genes encoding some translation factors are downregulated upon phagocytosis by murine macrophage
orf19.36	orf19.36	0.00283565	0.649428	0.00435222	0.309715	0.00769195	0.300305	0.00585999	0.069441	Predicted ORF in Assemblies 19, 20 and 21; clade-associated gene expression
orf19.360	FUR4	0.0013873	0.830047	0.00765703	0.173086	0.00738111	0.12107	0.00758224	0.430399	Predicted ORF in Assemblies 19, 20 and 21
orf19.3600	orf19.3600	0.012826	0.144991	0.000327938	0.97848	0.0152381	0.160468	0.00853244	0.175444	Predicted ORF in Assemblies 19, 20 and 21
orf19.3601	orf19.3601	-0.047833	0.199721	-0.16452	0.0379046	-0.173119	0.201329	-0.040263	0.275533	Predicted ORF in Assemblies 19, 20 and 21
orf19.3604	orf19.3604	-0.246614	0.0547072	-0.217676	0.16593	-0.161937	0.113896	-0.207769	0.00498817	Predicted ORF in Assemblies 19, 20 and 21
orf19.3608	orf19.3608	-0.000449834	0.908898	0.00159347	0.832391	-0.00208905	0.578311	-0.0011399	0.832872	Predicted ORF in Assemblies 19, 20 and 21
orf19.3610	orf19.3610	0.00802956	0.015726	0.000376859	0.958434	0.00166626	0.831982	0.00397513	0.512223	Predicted ORF in Assemblies 19, 20 and 21; upregulation correlates with clinical development of fluconazole resistance
orf19.3612	PST2	0.00128288	0.969868	0.0488369	0.344629	0.014771	0.642161	0.0291739	0.606289	Putative NADH:quinone oxidoreductase; similar to 1,4-benzoquinone reductase; immunogenic in mice; benomyl treatment induces transcription; oxidative stress-induced via Cap1p; fungal-specific (no human/murine homolog), farnesol-downregulated
orf19.3613	orf19.3613	-0.148306	0.173436	-0.137646	0.221149	-0.163477	0.136187	-0.127319	0.278888	Predicted ORF in Assemblies 19, 20 and 21
orf19.3615	orf19.3615	6.61896e-05	0.985236	-0.00173197	0.813855	-0.00173961	0.477088	0.00219489	0.553913	Predicted ORF in Assemblies 19, 20 and 21; induced in core caspofungin response; increased expression observed in an ssr1 homozygous null mutant; induced by nitric oxide in yhb1 mutant
orf19.3616	ERG9	-0.00177845	0.77283	0.00389962	0.759247	-0.000702975	0.905483	0.00188829	0.618204	Putative farnesyl-diphosphate farnesyl transferase (squalene synthase) involved in the sterol biosynthesis pathway; likely to be essential for growth; regulated by fluconazole and lovastatin; amphotericin B, caspofungin repressed
orf19.3617	orf19.3617	-0.00248866	0.735304	-0.00539793	0.411956	-0.000244915	0.978741	-0.00709428	0.145734	Putative protein of unknown function, transcription is upregulated in clinical isolates from HIV+ patients with oral candidiasis;; predicted ORF in Assemblies 19, 20 and 21 (see Locus History Note for Assembly 19 correction)
orf19.362	TLO9	-0.000652929	0.887728	-0.00116499	0.745742	0.000783951	0.827451	0.000215803	0.932372	Member of a family of telomere-proximal genes of unknown function
orf19.3624	orf19.3624	0.00421145	0.156063	0.00226245	0.568696	0.00540345	0.344942	0.00636316	0.0279388	Predicted ORF in Assemblies 19, 20 and 21
orf19.3627	orf19.3627	-0.0078626	0.420994	-0.0405127	0.346667	-0.00925991	0.612239	-0.00207923	0.856696	Predicted ORF in Assemblies 19, 20 and 21
orf19.3628	RSP5	0.000134757	0.979729	0.00269839	0.89953	0.00459106	0.385745	-0.0296267	0.0833176	Predicted ORF in Assemblies 19, 20 and 21; induced during infection of murine kidney, compared to growth in vitro; has murine homolog
orf19.3629	DSE1	0.00163438	0.604173	0.00673296	0.235457	0.00544687	0.256855	0.00987914	0.0342059	Predicted cell wall protein; transcription is decreased in mutant lacking ACE2; periodic mRNA expression, peak at cell-cycle M/G1 phase
orf19.3630	RRP8	0.00605975	0.152175	0.00856916	0.320301	0.00626778	0.153331	0.00638186	0.0992897	Predicted ORF in Assemblies 19, 20 and 21; induced upon biofilm formation
orf19.3631	orf19.3631	-0.00815483	0.11499	-0.0118407	0.206848	0.000430271	0.965404	0.00177361	0.847897	Predicted ORF in Assemblies 19, 20 and 21; possibly spurious ORF (Annotation Working Group prediction)
orf19.3633	orf19.3633	0.0014934	0.827499	0.00127339	0.890949	-0.0021611	0.819384	0.00601761	0.152063	Predicted ORF in Assemblies 19, 20 and 21
orf19.364	orf19.364	0.008028	0.132434	0.00601523	0.0693504	0.00137048	0.889335	0.0039701	0.497949	Predicted ORF in Assemblies 19, 20 and 21
orf19.3642	SUN41	-0.000517182	0.903175	0.0012717	0.763259	-0.00480479	0.227147	-0.00331491	0.204552	Putative cell wall glycosidase involved in biofilm formation; required for cell separation; hyphal induced; caspofungin repressed; Efg1p, Cph1p regulated; O-glycosylation, potential Kex2p substrate; 9 5' E-boxes; 5'-UTR intron
orf19.3643	orf19.3643	0.00892242	0.133234	0.000451951	0.964502	0.00438483	0.377574	0.0099969	0.289809	Predicted ORF in Assemblies 19, 20 and 21
orf19.3644	orf19.3644	-0.0122588	0.237069	-0.0285552	0.21036	0.0127814	0.207064	-0.0220171	0.213852	Predicted ORF in Assemblies 19, 20 and 21; greater mRNA abundance observed in a cyr1 homozygous null mutant than in wild type
orf19.3646	CTR1	0.00464893	0.143894	0.00389666	0.480457	0.00257691	0.716496	-0.000602896	0.970962	Copper transporter; probably multimeric; transcribed if copper limited; induced by Mac1p, macrophage interaction, alkaline pH via Rim101p; 17-beta-estradiol downregulated; complements S. cerevisiae ctr1 ctr3 copper transport mutant
orf19.3647	orf19.3647	0.00844155	0.132434	0.000168051	0.994198	0.00628827	0.296165	-0.00403484	0.689816	Predicted ORF in Assemblies 19, 20 and 21
orf19.3648	orf19.3648	-0.00057891	0.959768	-0.0063475	0.463482	-0.000247109	0.990141	0.000165843	0.987032	Predicted ORF in Assemblies 19, 20 and 21
orf19.3649	orf19.3649	0.00596186	0.137412	0.00935029	0.0880397	0.000134955	0.979125	0.00546027	0.30392	Predicted ORF in Assemblies 19, 20 and 21
orf19.3653	FAT1	0.00128734	0.653191	-0.0370905	0.237927	-0.10401	0.0413034	-0.0447599	0.228108	Predicted enzyme of sphingolipid biosynthesis; upregulated in biofilm
orf19.3655	orf19.3655	0.00191277	0.519832	-0.00134555	0.855637	-0.00205221	0.536268	0.000913703	0.894692	Predicted ORF in Assemblies 19, 20 and 21; possibly spurious ORF (Annotation Working Group prediction)
orf19.3656	COX15	-3.58991e-05	0.996962	0.0057925	0.435187	0.00835263	0.133899	0.00347082	0.192652	Transcription is regulated by Nrg1p and Tup1p; alkaline downregulated
orf19.3659	orf19.3659	-0.00402965	0.621591	0.00172329	0.842196	0.000893861	0.888027	0.000321326	0.929367	Predicted ORF in Assemblies 19, 20 and 21
orf19.366	orf19.366	0.0124895	0.135553	-0.00313705	0.396381	0.0108471	0.240095	-0.0025925	0.705084	Predicted ORF in Assemblies 19, 20 and 21
orf19.3661	orf19.3661	-0.00964698	0.723143	-0.0101864	0.788771	-0.0143099	0.619774	-0.00163612	0.958467	Predicted ORF in Assemblies 19, 20 and 21; transcriptionally activated by Mnl1p under weak acid stress
orf19.3663	PHO91	-0.00689688	0.245327	-0.00351529	0.736038	-0.0153954	0.0933231	-0.0010841	0.867783	Putative low-affinity phosphate transporter; fungal-specific (no human or murine homolog)
orf19.3664	HSP31	0.0116929	0.00196037	0.0100348	0.161622	0.00153196	0.814058	0.00489534	0.36797	Protein repressed during the mating process
orf19.3665	orf19.3665	-0.00472542	0.0690407	0.00231928	0.664992	-0.00116382	0.854141	-0.00362548	0.483818	Predicted ORF in Assemblies 19, 20 and 21
orf19.3666	orf19.3666	0.00131684	0.620675	0.000175937	0.968939	-0.00252054	0.231196	-0.000289759	0.935326	Predicted ORF in Assemblies 19, 20 and 21
orf19.3669	SHA3	0.00450563	0.135548	0.00370509	0.511079	0.00406772	0.448262	0.00305135	0.542974	Protein similar to S. cerevisiae Sha3p, which is a serine/threonine kinase involved in glucose transport; transposon mutation affects filamentous growth; fluconazole-induced; ketoconazole-repressed; induced in response to alpha pheromone
orf19.367	CNH1	-0.0018032	0.829352	0.00410953	0.673709	-0.00721708	0.341719	0.00740966	0.192372	Na+/H+ antiporter; required for wild-type growth, cell morphology, and virulence in a mouse model of systemic infection; not transcriptionally regulated by NaCl; fungal-specific (no human or murine homolog)
orf19.3670	GAL1	0.00567577	0.292461	0.011536	0.194205	0.0138488	0.0863563	0.0054704	0.627314	Galactokinase; transcription regulated by galactose; transcription regulated by Mig1p and Tup1p; not required for systemic mouse virulence; farnesol-downregulated in biofilm; fluconazole-induced
orf19.3671	orf19.3671	0.0125863	0.232986	0.00989089	0.276514	0.00909741	0.0943977	0.0126649	0.487402	Predicted ORF in Assemblies 19, 20 and 21; possibly spurious ORF (Annotation Working Group prediction)
orf19.3672	GAL10	0.00566769	0.377548	0.0012185	0.805878	0.00236655	0.619467	0.0055429	0.282292	UDP-glucose 4-epimerase, required for galactose utilization; mutant shows cell wall defects and increased filamentation; fluconazole-induced; protein detected by mass spec in stationary phase cultures
orf19.3674	GAL102	-0.00783569	0.58355	-0.0353777	0.331879	0.00341901	0.810533	0.00287708	0.85148	Predicted ORF in Assemblies 19, 20 and 21; mutation confers hypersensitivity to toxic ergosterol analog
orf19.3676	ABP140	0.00237351	0.396719	0.00483617	0.369212	-0.00247171	0.67156	0.00253722	0.31129	Protein similar to S. cerevisiae actin-binding protein Abp140p; induced upon biofilm formation
orf19.3678	orf19.3678	0.0130719	0.0363576	-0.00714171	0.803088	-0.00217776	0.519005	-0.000918219	0.893186	Protein not essential for viability
orf19.3679	orf19.3679	-0.00156878	0.723518	-0.0138953	0.0537983	0.00467519	0.115156	0.00160312	0.809627	Predicted ORF in Assemblies 19, 20 and 21; protein detected by mass spec in stationary phase cultures
orf19.3680	2009-09-07	-0.00612177	0.654314	0.014089	0.309379	0.0100328	0.58678	0.00401724	0.745828	Septin, required for wild-type invasive growth in vitro but not required for virulence in a mouse model of systemic infection; localizes to hyphal septum or bud neck; Asn-rich; aberrant gel mobility
orf19.3681	orf19.3681	0.00902934	0.122585	-0.00806974	0.451247	0.00171872	0.846275	0.00766224	0.336533	Predicted ORF in Assemblies 19, 20 and 21
orf19.3683	orf19.3683	-0.00127848	0.825321	-0.00322822	0.795085	0.00371147	0.553455	0.00723765	0.516238	Putative transcription factor with zinc finger DNA-binding motif
orf19.3685	PSY2	0.00249669	0.50621	0.00196129	0.637811	-0.000341715	0.897536	0.00330055	0.228402	Predicted ORF in Assemblies 19, 20 and 21; macrophage-induced gene
orf19.3689	orf19.3689	-0.00206745	0.525661	0.00105401	0.920644	0.00307608	0.624947	0.000285472	0.935326	Predicted ORF in Assemblies 19, 20 and 21; decreased expression observed in an ssr1 homozygous null mutant
orf19.3690.2	orf19.3690.2	-0.00712271	0.372448	-0.000285524	0.971677	-0.000941623	0.819384	0.00110429	0.874286	ORF Predicted by Annotation Working Group
orf19.3691	orf19.3691	0.00158226	0.540233	0.00269009	0.415911	0.000849954	0.758249	-0.000782232	0.814154	Predicted ORF in Assemblies 19, 20 and 21; ketoconazole-repressed
orf19.3694	orf19.3694	0.00169222	0.578825	0.000674324	0.935965	-0.000401689	0.930081	-0.00538423	0.098503	Predicted ORF in Assemblies 19, 20 and 21
orf19.3697	orf19.3697	-0.000373398	0.952074	0.00696073	0.524847	0.00730998	0.160468	0.00314155	0.640879	Predicted ORF in Assemblies 19, 20 and 21
orf19.3698	orf19.3698	0.00602296	0.130258	0.00647822	0.491767	0.000711504	0.915516	0.00356249	0.439792	Predicted ORF in Assemblies 19, 20 and 21; filament induced
orf19.3699	TEP1	0.00090632	0.901154	0.00289776	0.69105	0.0107441	0.116829	0.00659947	0.197299	Putative protein phosphatase of the PTP family (tyrosine-specific), similar to S. cerevisiae Tep1p
orf19.3701	orf19.3701	-0.00123852	0.895303	0.0125421	0.0862604	-0.00100612	0.904938	0.00813042	0.362396	Protein not essential for viability
orf19.3704	orf19.3704	-0.010519	0.117008	-0.00884067	0.211961	-0.00420235	0.706933	-0.00570425	0.245979	Predicted ORF in Assemblies 19, 20 and 21
orf19.3704.1	orf19.3704.1	-0.0146616	0.240065	0.00362171	0.92633	-0.0304593	0.00499718	-0.0253719	0.493898	ORF Predicted by Annotation Working Group
orf19.3705	PTC6	0.00933272	0.164353	0.00877197	0.140622	0.0115121	0.1322	0.0123495	0.126627	Putative protein phosphatase of the Type 2C-related family (serine/threonine-specific), similar to S. cerevisiae Ptc6p; mutant shows virulence defect
orf19.3706	orf19.3706	0.000240679	0.963148	0.00465138	0.0685507	0.00244137	0.499599	0.00371977	0.298566	Predicted ORF in Assemblies 19, 20 and 21
orf19.3707	YHB1	0.00161244	0.758939	0.00786159	0.313721	0.00214697	0.585637	0.00501882	0.336058	Nitric oxide dioxygenase; acts in nitric oxide scavenging/detoxification; role in virulence in mouse; not essential for viability; similar to S. cerevisiae Yhb1p; transcription activated by NO, macrophage interaction; hyphal downregulated
orf19.3708	SAP2	0.00845078	0.144977	0.00913979	0.153057	0.0071821	0.152953	0.00791605	0.232656	Major secreted aspartyl proteinase; roles in use of protein as nitrogen source, virulence in mouse, rat, guinea pig, human vaginal epithelium; immunoprotective; allele-specific function; regulated by growth, albumin, drugs, white cell-type
orf19.3710	YHB5	-0.00303714	0.549457	-0.00173676	0.835767	0.00260411	0.557996	-0.00403559	0.605567	Protein related to flavohemoglobins; not required for wild-type nitric oxide resistance; has predicted globin, FAD-binding, and NAD(P)-binding domains but lacks some conserved residues of flavohemoglobins; mRNA detected; filament induced
orf19.3720	orf19.3720	-0.019022	0.00979228	-0.00145876	0.926824	0.000234757	0.975061	0.00294165	0.703729	Predicted ORF in Assemblies 19, 20 and 21
orf19.3721	orf19.3721	-0.0140609	0.0365286	-0.000228033	0.976509	0.000404259	0.90384	-0.00713991	0.0682311	Predicted ORF in Assemblies 19, 20 and 21
orf19.3722	orf19.3722	0.0027371	0.417422	-0.0021733	0.570532	0.00290739	0.602967	0.00656195	0.275838	Predicted ORF in Assemblies 19, 20 and 21
orf19.3726	orf19.3726	0.00216809	0.235545	-0.000844563	0.857481	-0.0038691	0.245303	0.0011934	0.730265	Predicted ORF in Assemblies 19, 20 and 21
orf19.3727	PHO112	0.0206129	0.0378112	0.0107602	0.37528	-0.00163113	0.883014	-0.0112986	0.505287	Protein described as a constitutive acid phosphatase; transcription is negatively regulated by Rim101p; DTT-extractable; N-glycosylated
orf19.3728	orf19.3728	-0.00981095	0.144977	0.00470527	0.351772	0.000549461	0.947578	0.0075034	0.192704	Predicted ORF in Assemblies 19, 20 and 21
orf19.3730	orf19.3730	0.00737248	0.241771	-0.0114071	0.486199	0.0092271	0.0990116	0.00521428	0.482944	Protein similar to S. cerevisiae Kre27p, which has a role in resistance to killer toxin; predicted Kex2p substrate
orf19.3732	ERG25	-0.000430956	0.884332	-0.000444544	0.893021	-0.0017279	0.562382	0.00312473	0.278888	Putative C-4 methyl sterol oxidase with role in C4-demethylation of ergosterol biosynthesis intermediates, based on similarity to S. cerevisiae Erg25p; fluconazole-induced; upregulated in biofilm and in azole-resistant strain
orf19.3733	IDP2	0.0239481	0.0198105	-0.00603404	0.807253	0.0124318	0.0743476	0.00761936	0.403982	Putative isocitrate dehydrogenase; expression is regulated upon white-opaque switching; shows colony morphology-related gene regulation by Ssn6p; protein detected by mass spec in exponential and stationary phase cultures
orf19.3734	GEF2	-0.00293168	0.301623	-0.000521422	0.962111	-0.00407095	0.430116	0.0077071	0.044563	Predicted ORF in Assemblies 19, 20 and 21
orf19.3735	orf19.3735	0.00525616	0.215782	-0.00763711	0.744186	-0.00153093	0.822604	0.00145326	0.901978	Predicted ORF in Assemblies 19, 20 and 21; transcription is induced in response to alpha pheromone in SpiderM medium
orf19.3736	KAR4	0.00776278	0.202619	0.00431035	0.592054	0.00323945	0.607034	0.0120015	0.0580663	Protein similar to S. cerevisiae Kar4p, which has a role in karyogamy; transcription is opaque-specific, a-specific, and induced by alpha factor
orf19.3737	orf19.3737	0.00254193	0.767605	-0.000185721	0.985269	-0.00121236	0.815285	0.00425659	0.479822	Predicted ORF in Assemblies 19, 20 and 21; transcription is downregulated in response to treatment with ciclopirox olamine
orf19.3738	PGA22	0.0111567	0.0479158	0.00304001	0.868136	0.00766412	0.242014	0.0124797	0.0647775	Putative GPI-anchored protein of unknown function
orf19.3740	PGA23	0.00459622	0.717182	0.010009	0.0185245	-0.00620941	0.514884	0.00308559	0.840069	Putative GPI-anchored protein of unknown function; transcription is negatively regulated by Rim101p; regulated by Cyr1p; shows colony morphology-related gene regulation by Ssn6p
orf19.3743	orf19.3743	0.0109503	0.123461	0.00272287	0.827877	0.00246949	0.758169	0.000577853	0.840501	Predicted ORF in Assemblies 19, 20 and 21
orf19.3744	orf19.3744	-0.000804714	0.849456	0.00794714	0.0887201	0.00366884	0.260509	0.00413624	0.382464	Predicted ORF in Assemblies 19, 20 and 21
orf19.3749	IFC3	0.0134632	0.132391	-0.0100458	0.678294	0.00258809	0.872483	-0.0311855	0.0859129	Oligopeptide transporter; transcriptionally induced upon phagocytosis by macrophage; induced by BSA or peptides; fluconazole-induced; upregulated by Rim101p at pH 8; virulence-group-correlated expression; no human or murine homolog
orf19.3751	orf19.3751	0.00379967	0.664659	0.000118863	0.989257	0.000377693	0.94472	-0.00256176	0.453935	Predicted ORF in Assemblies 19, 20 and 21
orf19.3752	RAD51	0.00361184	0.648464	-0.00357976	0.843391	0.00482584	0.505335	0.00776002	0.258295	Predicted ORF in Assemblies 19, 20 and 21; flucytosine induced; slow growth and increased white-to-opaque switching frequency in null mutant
orf19.3753	SEF1	-0.0373503	0.101042	-0.0254688	0.345929	-0.0396358	0.227711	-0.0521478	0.0101412	Putative transcription factor with zinc cluster DNA-binding motif; transcription is negatively regulated by Sfu1p and positively regulated by Tbf1p
orf19.3755	orf19.3755	-0.00312667	0.458892	0.0102456	0.126408	0.00275865	0.213971	-0.00853005	0.0799099	Predicted ORF in Assemblies 19, 20 and 21
orf19.3756	CHR1	0.00443325	0.405016	-0.0073274	0.477897	0.000701774	0.929689	0.00779726	0.421666	Predicted DEAD-box ATP-dependent RNA helicase, functional homolog of S. cerevisiae Rok1p
orf19.3759	orf19.3759	0.00349523	0.397153	0.00495181	0.730287	0.00357666	0.624947	-0.00267491	0.535316	Predicted ORF in Assemblies 19, 20 and 21
orf19.3760	DLH1	0.00875064	0.179221	0.0121183	0.167024	0.00628005	0.284607	0.0029817	0.764688	Functional homolog of S. cerevisiae Dmc1p, which is a meiosis-specific protein
orf19.3761	CDC54	-0.032808	0.134602	0.00527976	0.807982	-0.0138688	0.524889	-0.00659886	0.724761	Transcription is regulated by Nrg1p and Mig1p; periodic mRNA expression, peak at cell-cycle M/G1 phase
orf19.3763	orf19.3763	0.00417522	0.215464	0.00588701	0.444144	0.00415902	0.128454	0.00567202	0.132446	Predicted ORF in Assemblies 19, 20 and 21
orf19.3765	RAX2	0.00128834	0.81189	0.00740641	0.34111	0.00377438	0.213971	0.00781746	0.192704	Protein of unknown function; detected at yeast-form cell plasma membrane by mass spectrometry; transcription is filament induced and negatively regulated by Rim101p, Tup1p
orf19.3769	orf19.3769	0.00381017	0.257176	0.00262458	0.799686	0.00125519	0.625009	0.00448351	0.456533	Predicted ORF in Assemblies 19, 20 and 21
orf19.377	PHR3	-0.00924525	0.32872	0.00963231	0.356609	8.0965e-05	0.989807	0.00655806	0.606289	Predicted ORF in Assemblies 19, 20 and 21; fungal-specific (no human or murine homolog)
orf19.3770	ARG8	-0.00022181	0.914606	-0.001517	0.69105	0.00206567	0.58872	-0.000681213	0.730265	Predicted ORF in Assemblies 19, 20 and 21; Gcn2p-, Gcn4p-regulated; transcription is upregulated in both intermediate and mature biofilms
orf19.3772	orf19.3772	-0.00176717	0.834936	0.00296673	0.637731	-0.004474	0.433501	-0.00270878	0.727776	Predicted ORF in Assemblies 19, 20 and 21; possibly spurious ORF (Annotation Working Group prediction); merged with orf19.3773 in Assembly 21
orf19.3774	PPG1	0.00267419	0.481337	0.00204933	0.785516	0.00256092	0.42332	0.00849141	0.308277	Putative protein phosphatase of the Type 2A-related family (serine/threonine-specific), similar to S. cerevisiae Ppg1p
orf19.3775	SSK2	-0.0812696	0.0285233	-0.0821986	0.0157022	-0.114269	0.000298157	-0.0876529	0.000122119	Protein described as similar to MAP kinase kinase kinases; transcription is downregulated in response to treatment with ciclopirox olamine
orf19.3782	orf19.3782	0.00474288	0.116461	4.90645e-05	0.993216	0.00123637	0.737545	0.0047113	0.537048	Predicted membrane transporter, member of the peptide-acetyl-coA transporter (PAT) family, major facilitator superfamily (MFS); transcription is induced in response to alpha pheromone in Spider medium
orf19.3782.2	orf19.3782.2	-0.00223074	0.377147	0.00329284	0.187075	0.00106676	0.8606	-0.00294505	0.323589	ORF Predicted by Annotation Working Group; intron in 5'-UTR
orf19.3784	orf19.3784	0.000716232	0.849927	-0.00727656	0.50179	0.00301602	0.53529	-0.00164258	0.843362	Predicted ORF in Assemblies 19, 20 and 21; possibly spurious ORF (Annotation Working Group prediction)
orf19.3785	orf19.3785	0.0143219	0.10201	0.00337615	0.720057	0.00839445	0.232935	0.0102369	0.160821	Predicted ORF in Assemblies 19, 20 and 21
orf19.3792	orf19.3792	-0.0165892	0.306626	0.00288794	0.848028	0.00200022	0.890039	-0.00370156	0.89112	Predicted ORF in Assemblies 19, 20 and 21
orf19.3793	orf19.3793	-0.0019078	0.907867	-0.0126503	0.50522	-0.00135226	0.941807	0.00669963	0.754463	Predicted ORF in Assemblies 19, 20 and 21; regulated by Nrg1p; greater mRNA abundance observed in a cyr1 or ras1 homozygous null mutant than in wild type; possibly spurious ORF (Annotation Working Group prediction)
orf19.3794	CSR1	-0.0115208	0.617092	0.00182896	0.958257	-0.0194622	0.303479	-0.0245363	0.31905	Putative zinc-finger transcription factor involved in zinc homeostasis; involved in negative regulation of biofilm matrix; similar to S. cerevisiae Zap1p; mutation affects filamentous growth; suppresses S. cerevisiae rok1 mutant inviability
orf19.3796	orf19.3796	0.000882435	0.682404	0.00264076	0.0769597	-0.00133132	0.634977	0.000372926	0.929146	Putative Dicer RNAse involved in RNA interference, similar to S. cerevisiae Rnt1p but orthologous to S. castellii Dcr1p, which is not conserved in S. cerevisiae; predicted ORF in Assemblies 19, 20 and 21
orf19.3798	orf19.3798	0.0110053	0.0734807	-0.00951656	0.527342	-0.0180447	0.357977	-0.0135784	0.31441	Predicted ORF in Assemblies 19, 20 and 21
orf19.3802	PMT6	-0.076044	0.00395752	-0.02811	0.446782	-0.0253357	0.149314	-0.161169	0.0306703	Protein mannosyltransferase, required for virulence in mouse systemic infection and for adhesion to endothelium; has a role in hyphal growth signaling and hygromycin B sensitivity; not a major contributor to overall cellular PMT activity
orf19.3803	MNN22	-0.00687112	0.541315	-0.000688294	0.974389	-0.00190598	0.869766	0.00274552	0.886993	Protein described as similar to Golgi alpha-1,2-mannosyltransferase; regulated by Tsa1p, Tsa1Bp in minimal media at 37 deg; Hog1p-induced; induced by nitric oxide; downregulated in core stress response
orf19.3804	orf19.3804	0.00341431	0.525239	0.00620148	0.23202	0.0090078	0.0863563	0.00572944	0.154236	Predicted ORF in Assemblies 19, 20 and 21; filament induced
orf19.3806	orf19.3806	0.000755143	0.937516	0.00340564	0.841999	0.00487248	0.517484	0.0111921	0.181953	Predicted ORF in Assemblies 19, 20 and 21
orf19.3810	orf19.3810	0.0133517	0.170078	0.00850647	0.147961	0.0139437	0.0376984	0.00353582	0.590699	Predicted ORF in Assemblies 19, 20 and 21
orf19.3811	GYP1	-0.000312099	0.929673	0.000724231	0.936762	0.000502808	0.90607	0.00160203	0.666264	Transcription is regulated by Nrg1p, Mig1p, and Tup1p
orf19.3813	orf19.3813	0.00728843	0.089472	0.00291781	0.654736	0.00648369	0.175261	0.00346499	0.282478	Predicted ORF in Assemblies 19, 20 and 21
orf19.3815	orf19.3815	0.00344145	0.306	0.00584007	0.375021	0.00478844	0.165145	-0.00384871	0.373229	Predicted ORF in Assemblies 19, 20 and 21
orf19.3818	GOA1	0.00468206	0.280743	0.000710447	0.936874	-0.00595617	0.411757	0.00786537	0.215789	Protein required for respiratory growth, resistance to oxidants, chlamydospore formation, hyphal growth under some conditions, and virulence; relocalizes from the cytoplasm to the mitochondrion during oxidative or osmotic stress
orf19.3819	orf19.3819	0.00233788	0.886723	0.0206164	0.0869696	-0.00582069	0.383748	0.00314593	0.813712	Predicted ORF in Assemblies 19, 20 and 21
orf19.382	TEF2	-0.0202466	0.0103774	-0.0621962	0.287386	-0.147126	0.00499718	-0.207146	0.0646952	Translation elongation factor 1-alpha; genes encoding ribosomal subunits, translation factors, and tRNA synthetases are downregulated upon phagocytosis by murine macrophage
orf19.3820	orf19.3820	-0.0107011	0.227132	-0.0541496	0.0544029	-0.0262549	0.0732236	-0.0297217	0.0122437	Predicted ORF in Assemblies 19, 20 and 21; clade-associated gene expression
orf19.3821	orf19.3821	0.00181456	0.855623	-0.00990591	0.175133	-0.00960661	0.190946	-0.0199309	0.3822	Predicted ORF in Assemblies 19, 20 and 21; possibly spurious ORF (Annotation Working Group prediction)
orf19.3823	ZDS1	0.00336874	0.432638	0.00454411	0.531064	0.00564349	0.26919	0.00987612	0.303869	Nonessential protein; similar to S. cerevisiae Zds1p
orf19.3826	orf19.3826	0.00610593	0.231299	-0.00889717	0.741009	0.0036051	0.404372	0.00826659	0.197887	Predicted ORF in Assemblies 19, 20 and 21; Plc1p-regulated
orf19.3827	orf19.3827	0.00427869	0.210998	0.00544855	0.0922644	0.00232194	0.763438	0.00444472	0.344677	Predicted ORF in Assemblies 19, 20 and 21
orf19.3829	PHR1	-0.0157912	0.1972	-0.00931291	0.484877	-0.00991542	0.0978196	-0.0116729	0.549676	Glycosidase of cell surface; may act on cell-wall beta-1,3-glucan prior to beta-1,6-glucan linkage; E169 and E270 at active site; role in systemic but not vaginal virulence (neutral, not low pH); high pH or filamentation induced
orf19.3831	orf19.3831	-0.00640513	0.38307	-0.015637	0.684447	-0.00268714	0.728109	0.000537409	0.952372	Predicted ORF in Assemblies 19, 20 and 21
orf19.3836	orf19.3836	0.0155006	0.133097	-0.0187658	0.700933	0.0197472	0.0761997	0.00317366	0.816369	Predicted ORF in Assemblies 19, 20 and 21
orf19.3840	orf19.3840	-0.0035785	0.590979	0.0114398	0.108851	0.00254543	0.70255	-0.00576928	0.382033	Predicted ORF in Assemblies 19, 20 and 21
orf19.3841	orf19.3841	0.000984206	0.942532	-0.00160551	0.860475	0.000552235	0.910874	0.0022409	0.737786	Predicted ORF in Assemblies 19, 20 and 21; described as similar to S. cerevisiae Apg1p; induced upon adherence to polystyrene
orf19.3843	orf19.3843	0.00258739	0.367163	0.00859398	0.011238	0.00496382	0.0935806	0.00730356	0.159235	Predicted ORF in Assemblies 19, 20 and 21
orf19.3844	MRP8	0.0201857	0.0378112	-0.0185421	0.203458	0.0090441	0.370436	0.00882258	0.26093	Protein not essential for viability; similar to S. cerevisiae Mrp8p, which is a mitochondrial ribosomal protein; greater transcription in hyphal form than yeast form
orf19.3845	FGR3	0.00368743	0.334082	0.00120201	0.921531	-0.00209232	0.614528	0.00647074	0.49139	Protein lacking an ortholog in S. cerevisiae; transposon mutation affects filamentous growth
orf19.3848	orf19.3848	0.00632847	0.460075	-0.00184771	0.89953	0.01066	0.129844	0.0179562	0.0698475	Predicted ORF in Assemblies 19, 20 and 21
orf19.3852	orf19.3852	0.0025884	0.736402	0.000232478	0.979468	0.00700362	0.303479	-0.00245212	0.885109	Predicted ORF in Assemblies 19, 20 and 21
orf19.3854	orf19.3854	0.0154874	0.0501834	0.018691	0.226118	-0.00922494	0.0510636	0.000355949	0.97281	Protein similar to S. cerevisiae Sat4p; amphotericin B induced; clade-associated gene expression
orf19.3856	CDC28	0.00477508	0.135404	0.0122159	0.0527647	0.0107997	0.0610342	-0.000506537	0.925887	Cyclin-dependent protein kinase, interacts with regulatory subunit Cyb1p; involved in determination of cell morphology during the cell cycle; phosphorylated primarily by Swe1p and phosphorylation is regulated by Hsl1p; intron in 5'-UTR
orf19.3858	orf19.3858	0.00905492	0.466209	0.0131989	0.135675	0.00579066	0.586177	0.0168537	0.126993	Predicted ORF in Assemblies 19, 20 and 21; possibly spurious ORF (Annotation Working Group prediction)
orf19.386	SAM4	0.0067049	0.373943	0.00975409	0.656219	0.00714949	0.309688	0.00827827	0.211081	Alkaline upregulated
orf19.3862	orf19.3862	-0.00450605	0.426559	-0.00260831	0.780761	0.0125169	0.0411914	0.0133392	0.044563	Predicted ORF in Assemblies 19, 20 and 21; heterozygous null mutant displays sensitivity to rapamycin
orf19.3863	orf19.3863	0.00800864	0.229221	-0.00643365	0.546391	0.00792066	0.142843	0.00805894	0.166106	Predicted ORF in Assemblies 19, 20 and 21
orf19.3865	RFX1	0.0118733	0.135553	0.00437291	0.600575	0.0139445	0.0743476	0.0135699	0.139209	Predicted ORF in Assemblies 19, 20 and 21; similar to S. cerevisiae Rfx1p (DNA-binding transcriptional repressor of DNA damage response); has RFX domain
orf19.3867	RPL7	0.00468948	0.0606657	-0.000503684	0.880734	-0.00345627	0.720452	-0.00130079	0.658177	Putative ribosomal-related protein; genes encoding cytoplasmic ribosomal subunits, translation factors, and tRNA synthetases are downregulated upon phagocytosis by murine macrophage
orf19.3869	orf19.3869	0.00393933	0.397359	0.00341396	0.517045	-0.00256542	0.760307	0.000479756	0.90173	Predicted ORF in Assemblies 19, 20 and 21; regulated by Tsa1p, Tsa1Bp in minimal media at 37 deg; shows colony morphology-related gene regulation by Ssn6p
orf19.3870	ADE13	0.00567294	0.0914832	0.00228275	0.712993	0.0044832	0.104168	0.0020797	0.582104	Enzyme of adenine biosynthesis; soluble protein in hyphae; not induced during GCN response, in contrast to the S. cerevisiae ortholog; repressed by nitric oxide
orf19.3872	orf19.3872	-0.0205082	0.158354	-0.0354229	0.119349	-0.0386722	0.071552	-0.014824	0.430105	Predicted ORF in Assemblies 19, 20 and 21
orf19.3873	ARC40	-0.000962219	0.844924	-0.000844161	0.856384	0.0010586	0.830235	-0.000278619	0.950065	Protein similar to S. cerevisiae Arc40p, which is involved in actin filament organization in S. cerevisiae; transposon mutation affects filamentous growth
orf19.3874	orf19.3874	0.00210863	0.834936	-0.00223398	0.745742	-0.00191512	0.790065	-0.00775047	0.161294	Predicted ORF in Assemblies 19, 20 and 21
orf19.3876	ZCF19	0.00516907	0.130046	0.00348241	0.504325	0.000678531	0.864597	0.0104813	0.075506	Predicted zinc-finger protein of unknown function
orf19.3877	orf19.3877	0.00544951	0.399409	0.00474572	0.781237	0.00141538	0.910835	-0.0155503	0.3822	Predicted ORF in Assemblies 19, 20 and 21; previously merged with orf19.3878; unmerged from orf19.3878 in a revision of Assembly 21
orf19.3879	orf19.3879	-0.00695889	0.108749	-0.00075507	0.892387	-9.56977e-05	0.986469	-0.0016	0.722428	Predicted ORF in Assemblies 19, 20 and 21; possibly spurious ORF (Annotation Working Group prediction); overlaps orf19.3879.1, which is a region annotated as blocked reading frame
orf19.3884	FGR50	-0.000699245	0.92202	-0.00405811	0.646252	0.00609989	0.42433	0.000786394	0.907214	Protein lacking an ortholog in S. cerevisiae; transposon mutation affects filamentous growth; possibly spurious ORF (Annotation Working Group prediction)
orf19.3885	orf19.3885	-8.40945e-05	0.976931	-0.00180727	0.631926	-0.00147993	0.358391	-0.000350714	0.896662	Predicted ORF in Assemblies 19, 20 and 21
orf19.3886	orf19.3886	-0.00104514	0.881989	0.00138897	0.890709	0.00655801	0.122283	0.00354218	0.512331	Predicted ORF in Assemblies 19, 20 and 21; possibly spurious ORF (Annotation Working Group prediction)
orf19.3888.2	orf19.3888.2	0.00757956	0.266996	0.00493083	0.743657	-0.00717451	0.370436	-0.00190184	0.840501	ORF Predicted by Annotation Working Group
orf19.389	orf19.389	-0.00239063	0.682492	0.00309399	0.780761	0.00480932	0.35387	0.00501018	0.276102	Predicted ORF in Assemblies 19, 20 and 21
orf19.3893	SCW11	0.00456466	0.378211	-0.000280938	0.98075	-0.00136038	0.869859	0.00915595	0.143525	Cell wall protein; transcription is decreased in mutant lacking ACE2; downregulated in core caspofungin response; transcriptionally regulated by iron; expression greater in high iron
orf19.3898	orf19.3898	-0.00102689	0.814751	-0.000120895	0.982759	0.00624257	0.0832937	0.00275721	0.32963	Predicted ORF in Assemblies 19, 20 and 21
orf19.390	CDC42	0.00487586	0.599543	-0.00482409	0.761646	0.0101582	0.199857	-0.00758399	0.404057	Rho-type GTPase; required for budding and maintenance of hyphal growth; GGTase I geranylgeranylated; misexpression blocks hyphal growth, causes avirulence in mouse IV infection; shows actin-dependent localization to hyphal tip
orf19.3900	orf19.3900	-0.00700044	0.231067	-0.0433535	0.0832751	0.0064725	0.241009	-0.0122682	0.116245	Predicted ORF in Assemblies 19, 20 and 21
orf19.3901	orf19.3901	0.00134347	0.845125	0.00419444	0.685608	0.00741258	0.211057	0.0049604	0.583112	Putative benzene desulfurase; induced by nitric oxide in yhb1 mutant
orf19.3902	orf19.3902	0.0143406	0.142496	-0.00596563	0.785663	0.0101697	0.212719	0.00430385	0.705835	Predicted ORF in Assemblies 19, 20 and 21; decreased transcription is observed upon fluphenazine treatment or in an azole-resistant strain that overexpresses CDR1 and CDR2
orf19.3903	orf19.3903	0.00359184	0.470937	0.00310693	0.570532	0.00411094	0.619166	0.00862927	0.0792242	Predicted ORF in Assemblies 19, 20 and 21
orf19.3904	orf19.3904	0.00418953	0.181052	-0.000883481	0.932361	0.00568454	0.305093	0.010397	0.181893	Predicted ORF in Assemblies 19, 20 and 21
orf19.3905	orf19.3905	-0.00660694	0.475056	0.00519385	0.457769	-0.0124295	0.229811	-0.00572809	0.581824	Predicted ORF in Assemblies 19, 20 and 21
orf19.3906	orf19.3906	-0.030021	0.0257846	-0.0137461	0.530934	-0.0210171	0.0271154	-0.0216894	0.069441	Protein not essential for viability
orf19.391	UPC2	-0.0189533	0.163945	-0.0114036	0.411956	-0.0014397	0.874754	-0.0261789	0.0208002	Transcriptional regulator of ergosterol biosynthetic genes and sterol uptake; binds ERG2 promoter; has Zn(2)-Cys(6) binuclear cluster; induced upon ergosterol depletion, by azoles, anaerobicity; macrophage/pseudohyphal-repressed
orf19.3911	SAH1	0.00632331	0.140617	-0.00645192	0.842196	0.00375645	0.400991	-0.00799526	0.4233	Protein described as S-adenosyl-L-homocysteine hydrolase; predicted enzyme of sulfur amino acid metabolism; antigenic in human; biofilm-, alkaline-, fluconazole-induced expression; Gcn4p-regulated; amino acid starvation (3-AT) repressed
orf19.3912	GLN3	0.00114811	0.854302	0.00417272	0.454719	0.0050766	0.12107	0.00919889	0.0842617	GATA transcription factor involved in regulation of filamentous growth induced by nitrogen starvation; regulates transcription of Mep2p ammonium permease; regulated by Gcn2p and Gcn4p
orf19.3914	orf19.3914	0.0107336	0.0755644	-0.00480071	0.7969	0.00644603	0.233614	0.00478864	0.422479	Predicted ORF in Assemblies 19, 20 and 21
orf19.3915	orf19.3915	0.00091045	0.740458	-0.00232054	0.858539	-0.00372018	0.439913	-0.00161782	0.613113	Predicted ORF in Assemblies 19, 20 and 21; Hog1p-induced; protein detected by mass spec in exponential and stationary phase cultures
orf19.3919	orf19.3919	0.00419626	0.423081	-0.00695156	0.481225	0.0122339	0.0755859	0.00563752	0.232656	Predicted ORF in Assemblies 19, 20 and 21
orf19.392	orf19.392	-0.0163692	0.691657	0.0148457	0.629494	0.0047061	0.868859	-0.0196606	0.615928	Predicted ORF in Assemblies 19, 20 and 21
orf19.3920	orf19.3920	0.00522917	0.0613972	0.002062	0.737591	-0.000491786	0.950979	0.00104256	0.82425	Predicted ORF in Assemblies 19, 20 and 21
orf19.3921	orf19.3921	0.00333327	0.272382	0.00442056	0.0610649	0.00526519	0.39298	0.00637799	0.0367644	Predicted ORF in Assemblies 19, 20 and 21
orf19.3923	PGA37	0.00932076	0.0988666	0.00464323	0.233066	0.00646186	0.388332	0.010771	0.177652	Putative GPI-anchored protein of unknown function
orf19.3924	orf19.3924	0.00467958	0.238488	0.00824613	0.42701	0.00157321	0.827451	0.00652829	0.537632	Predicted ORF in Assemblies 19, 20 and 21
orf19.3925	orf19.3925	0.00837957	0.0902696	-0.0206069	0.543877	0.00229832	0.856424	0.00626639	0.322725	Putative protein of unknown function, transcription is activated in the presence of elevated CO2; predicted ORF in Assemblies 19, 20 and 21
orf19.3926	orf19.3926	0.0168339	0.00577088	0.0108587	0.0371983	0.00631853	0.226626	0.00973653	0.0590667	Predicted ORF in Assemblies 19, 20 and 21
orf19.3928	orf19.3928	0.0019877	0.688529	0.00115856	0.801435	-0.00183813	0.598197	7.88023e-06	0.997695	Putative transcription factor with zinc finger DNA-binding motif
orf19.3932	orf19.3932	-0.0467091	0.0189622	-0.0327361	0.0295215	-0.0161305	0.168378	-0.138749	0.0849007	Predicted ORF in Assemblies 19, 20 and 21; induced in core caspofungin response; increased expression observed in ssr1 homozygous null mutant; induced by nitric oxide in yhb1 mutant; protein detected by mass spec in stationary phase culture
orf19.3934	CAR1	0.000279242	0.97834	0.00967068	0.482885	0.00805654	0.0351949	0.00627107	0.28971	Transcription is regulated by Nrg1p, Mig1p, and Tup1p; shows colony morphology-related gene regulation by Ssn6p; alkaline upregulated; protein level decreased in stationary phase cultures
orf19.3937	orf19.3937	0.00193463	0.772293	0.0074744	0.593094	0.00547858	0.320392	0.00569824	0.297805	Predicted ORF in Assemblies 19, 20 and 21
orf19.3938	orf19.3938	-0.00435759	0.797704	-0.00089189	0.939494	-0.0124815	0.271634	0.000822408	0.910232	Predicted ORF in Assemblies 19, 20 and 21; mutation confers hypersensitivity to 5-fluorocytosine (5-FC), 5-fluorouracil (5-FU), and tubercidin (7-deazaadenosine)
orf19.3939	orf19.3939	-0.00504416	0.225338	0.00276125	0.423533	-0.000649552	0.89262	-0.00315782	0.518732	Predicted ORF in Assemblies 19, 20 and 21
orf19.394	orf19.394	0.00273312	0.649223	-0.000144552	0.993571	0.00936581	0.397599	-0.00642023	0.423144	Putative kynureninase, involved in NAD biosynthesis
orf19.3940	orf19.3940	0.00256123	0.61401	-0.000480659	0.900261	-0.00318612	0.48449	0.0035991	0.642862	Predicted ORF in Assemblies 19, 20 and 21; possibly spurious ORF (Annotation Working Group prediction)
orf19.3941	URA7	-0.00086791	0.863073	0.000758797	0.92633	-0.000686624	0.90799	-0.00383104	0.228396	Predicted ORF in Assemblies 19, 20 and 21; flucytosine induced; protein detected by mass spec in exponential and stationary phase cultures
orf19.3942	orf19.3942	0.00764094	0.40704	-0.000484508	0.96848	0.00544847	0.492704	0.0103571	0.125628	Predicted ORF in Assemblies 19, 20 and 21
orf19.3942.1	RPL43A	-0.126897	0.00604359	-0.155468	0.0225172	-0.117483	0.00103361	-0.255132	0.00498817	Downregulated in the presence of human whole blood or polymorphonuclear (PMN) cells; shows colony morphology-related gene regulation by Ssn6p
orf19.3944	GRR1	-0.0668323	0.0755644	-0.0362934	0.120082	-0.0867897	0.049961	-0.0807962	0.00631257	Protein involved in the negative control of pseudohyphal growth; ortholog of S. cerevisiae Grr1p, which is an F-box protein component of the SCF ubiquitin-ligase complex required for cell cycle progression
orf19.3945	orf19.3945	0.00966068	0.199721	0.00433335	0.720057	0.0132941	0.011329	0.0146238	0.0125848	Predicted ORF in Assemblies 19, 20 and 21
orf19.3946	orf19.3946	-0.0042579	0.678023	0.00270882	0.481227	-0.00180567	0.792062	0.0030329	0.343686	Predicted ORF in Assemblies 19, 20 and 21
orf19.3949	orf19.3949	0.0021726	0.481496	0.00241561	0.55605	0.000824279	0.842029	0.00432498	0.233754	Predicted ORF in Assemblies 19, 20 and 21
orf19.395	ENO1	0.00888444	0.569762	-0.0123753	0.801673	-0.0317561	0.0500904	-0.00128017	0.963416	Enolase (2-phospho-D-glycerate-hydrolyase), enzyme of glycolysis and gluconeogenesis; major cell-surface antigen; binds host plasmin and plasminogen; immunoprotective; phagocytosis, biofilm-regulated; farnesol-downregulated
orf19.3950	MSM1	-0.00493496	0.360086	0.0101599	0.00522976	0.00504702	0.317267	0.0075601	0.107436	Mitochondrial methionyl-tRNA synthetase (MetRS); functionally complements methionine auxotrophy of an E. coli MetRS mutant; transcription is regulated by Nrg1p
orf19.3952	orf19.3952	0.000401973	0.961975	-0.0014022	0.900085	0.0149778	0.085945	0.00585565	0.411348	Predicted ORF in Assemblies 19, 20 and 21
orf19.3954	orf19.3954	0.00193851	0.693183	0.0045682	0.410237	0.00654399	0.0158978	0.00737897	0.203777	Predicted ORF in Assemblies 19, 20 and 21
orf19.3955	MES1	-0.00231896	0.696444	0.00646277	0.498105	-0.00534848	0.503719	-0.00808622	0.407046	Cytoplasmic methionyl-tRNA synthetase (MetRS); has zinc-binding motif; genes encoding ribosomal subunits, translation factors, and tRNA synthetases are downregulated upon phagocytosis by murine macrophage
orf19.3956	orf19.3956	-0.00958066	0.299657	0.00657233	0.435081	-0.00242996	0.493572	0.00383911	0.728235	Predicted ORF in Assemblies 19, 20 and 21
orf19.3959	SSD1	0.00399899	0.241771	0.00372886	0.323991	-0.00012318	0.967482	-0.000989624	0.811515	Protein with role in resistance to host antimicrobial peptides; virulence role in murine infection; functional homolog of S. cerevisiae Ssd1p, which suppresses various mutant phenotypes; constitutively expressed and not cell-cycle regulated
orf19.396	EAF6	0.00645082	0.490646	0.00592857	0.722027	0.00714081	0.51693	-0.00550246	0.795989	Subunit of the NuA4 histone acetyltransferase complex
orf19.3960	HYS2	0.00898078	0.271571	0.00574914	0.294427	0.00623125	0.209766	0.0068797	0.343291	Predicted ORF in Assemblies 19, 20 and 21; cell-cycle regulated periodic mRNA expression
orf19.3962	HAS1	0.00645567	0.140617	0.00189145	0.685087	0.00355601	0.533752	0.0067776	0.094278	Functional homolog of S. cerevisiae Has1p, which is a nucleolar protein of the DEAD-box ATP-dependent RNA helicase family that is involved in biogenesis of the ribosome, particularly the small (40S) subunit; caspofungin-downregulated
orf19.3963	orf19.3963	-0.0142585	0.256042	-0.00806191	0.723929	0.0022088	0.831489	-0.00550324	0.647778	Predicted ORF in Assemblies 19, 20 and 21
orf19.3964	ASH2	0.0035485	0.199859	0.0042175	0.104219	0.000855186	0.805402	0.00390809	0.06345	Predicted ORF in Assemblies 19, 20 and 21
orf19.3965	orf19.3965	0.00417571	0.568158	-0.00255226	0.932361	0.00524591	0.48043	0.0016154	0.712612	Predicted ORF in Assemblies 19, 20 and 21; possibly spurious ORF (Annotation Working Group prediction)
orf19.3967	PFK1	0.00493434	0.383955	0.00455159	0.422554	0.0118536	0.0570961	0.00815225	0.0950923	Alpha subunit of phosphofructokinase (PFK), which is Pfk1p, Pfk2p heteromultimer; PFK is activated by fructose 2,6-bisphosphate or AMP, inhibited by ATP; activity reduced on hyphal induction; phagocytosis-downregulated; fluconazole-induced
orf19.3968	orf19.3968	0.00205989	0.604196	0.00142405	0.785516	0.00260872	0.447473	0.00121385	0.894692	Predicted ORF in Assemblies 19, 20 and 21
orf19.3970	orf19.3970	0.00693166	0.327775	0.00528313	0.550892	0.00591948	0.430965	0.0106886	0.069441	Predicted ORF in Assemblies 19, 20 and 21
orf19.3972	orf19.3972	0.0151077	0.0180708	0.0105867	0.451662	0.00656647	0.294765	0.00224447	0.910232	Predicted ORF in Assemblies 19, 20 and 21
orf19.3974	PUT2	-0.00568913	0.66456	5.7535e-05	0.995713	0.00225976	0.670427	-0.00156539	0.850275	Alkaline upregulated; protein detected by mass spec in exponential and stationary phase cultures
orf19.3976	orf19.3976	0.00912109	0.0319922	0.00813113	0.374666	0.00768545	0.452962	0.00961397	0.215789	Predicted ORF in Assemblies 19, 20 and 21
orf19.3978	orf19.3978	0.0129433	0.019275	0.00658356	0.288949	0.00505076	0.602967	0.0085078	0.178134	Predicted ORF in Assemblies 19, 20 and 21
orf19.398	orf19.398	0.00691679	0.222741	0.0197104	0.0292054	-0.00434071	0.716783	-0.00510844	0.733581	Predicted ORF in Assemblies 19, 20 and 21; possibly spurious ORF (Annotation Working Group prediction)
orf19.3982	orf19.3982	0.00276947	0.64651	0.000335098	0.975529	0.00859472	0.195908	0.0110704	0.232982	Maltase; induced during growth on sucrose; transcription is induced in response to alpha pheromone in SpiderM medium
orf19.3983	orf19.3983	-0.00144659	0.654314	-0.00708351	0.562322	-0.00646868	0.160468	0.00080525	0.876035	Predicted ORF in Assemblies 19, 20 and 21
orf19.399	orf19.399	-0.000459854	0.956682	0.00157082	0.926552	0.00536737	0.340344	0.00193565	0.816369	Predicted ORF in Assemblies 19, 20 and 21
orf19.3991	orf19.3991	0.00300198	0.419201	0.00234358	0.716178	0.00348747	0.349242	-0.00849197	0.505645	Predicted ORF in Assemblies 19, 20 and 21
orf19.3994	orf19.3994	0.000529514	0.934944	0.00541623	0.344437	0.00431126	0.298538	0.00679087	0.32768	Predicted ORF in Assemblies 19, 20 and 21
orf19.3995	RIM13	0.00169439	0.669542	0.00265919	0.698022	0.00439793	0.452523	0.00747353	0.117647	Probable protease involved in the pH response pathway, likely to mediate activation of the transcription factor Rim101p via C-terminal cleavage; required for alkaline pH-induced hyphal growth and for normal levels of chlamydospore formation
orf19.3996	orf19.3996	0.00121204	0.913098	0.0024055	0.928281	0.00733757	0.316836	0.00968757	0.197834	Putative mannosyltransferase; similar to S. cerevisiae Gpi10p; has HKEXRF motif
orf19.3997	ADH1	0.00141637	0.81946	-0.00586129	0.587171	0.00034162	0.975061	-0.0050768	0.695131	Alcohol dehydrogenase; at yeast-form but not hyphal cell surface; soluble in hyphae; immunogenic in human or mouse; complements S. cerevisiae adh1 adh2 adh3 mutation; regulated by growth phase, carbon source; fluconazole-, farnesol-induced
orf19.3999	orf19.3999	0.00328463	0.206426	0.00281567	0.498686	0.00398936	0.19496	0.00647178	0.24529	Predicted ORF in Assemblies 19, 20 and 21
orf19.400	GCF1	0.0154674	0.202619	-0.00218713	0.904357	0.0178271	0.0732236	0.0115368	0.225983	HMG box-containing mitochondrial (mt) protein; binds to mt DNA and to the HWP1 promoter; mutant phenotype and functional complementation of an S. cerevisiae abf2 mutation suggest a role in mt genome replication and maintenance
orf19.4002	DUN1	0.00586515	0.250364	-0.00431268	0.784271	-0.00674354	0.712391	0.00436016	0.616986	Protein similar to S. cerevisiae Dun1p, which is a serine-threonine protein kinase involved in DNA damage cell-cycle checkpoint; induced under Cdc5p depletion
orf19.4003	TIP20	0.0105251	0.14835	0.00334487	0.682193	0.00722728	0.294765	0.010337	0.132312	Protein interacting with Sec20p, possibly involved in retrograde transport between the Golgi and the endoplasmic reticulum; similar to S. cerevisiae Tip20p
orf19.4004	CCT3	-0.00383486	0.614823	0.00303256	0.762295	0.00323293	0.577962	0.000508735	0.932386	Predicted ORF in Assemblies 19, 20 and 21; mutation confers hypersensitivity to cytochalasin D
orf19.4005	orf19.4005	-0.0277526	0.00521199	-0.0122989	0.292031	-0.019139	0.387329	-0.0270333	0.15252	Protein likely to be essential for growth, based on an insertional mutagenesis strategy
orf19.4006	orf19.4006	0.00863737	0.179282	0.0037871	0.706744	0.00613534	0.358391	0.00946539	0.176961	Predicted ORF in Assemblies 19, 20 and 21
orf19.4007	orf19.4007	0.00821802	0.13375	-0.0134728	0.288949	0.00756301	0.448262	-0.0141382	0.112191	Predicted ORF in Assemblies 19, 20 and 21
orf19.4009	CNB1	0.0169546	0.019275	-0.00247789	0.728156	-0.00429668	0.786543	-0.00400259	0.701002	Regulatory subunit of calcineurin B (Ca[2+]-calmodulin-regulated S/T protein phosphatase); required for wild-type resistance to fluconazole or to SDS; micafungin is fungicidal to null mutant
orf19.401	TCP1	0.000811852	0.811865	0.000349296	0.963117	-0.00560405	0.278677	0.000912221	0.861001	Transcription is induced in response to alpha pheromone in SpiderM medium; protein detected by mass spec in stationary phase cultures
orf19.4010	PAN3	0.0078311	0.512045	-0.0260732	0.309715	0.0113345	0.375412	-0.0177322	0.456726	Protein not essential for viability; similar to S. cerevisiae Pan3p, which is a subunit of an RNAse complex that controls poly(A) tail length
orf19.4012	PCL5	-0.0176383	0.00997282	-0.00860498	0.124388	0.00185802	0.827451	-0.00115395	0.832296	Protein similar to S. cerevisiae Pcl5p and other cyclins for Pho85p kinase; Gcn4p-induced; suppresses toxicity of C. albicans Gcn4p overproduction in S. cerevisiae via increased Pho85p-dependent phosphorylation and degradation of Gcn4p
orf19.4014	orf19.4014	-0.00247923	0.722296	-0.00939404	0.368877	0.00229635	0.589289	0.00597508	0.275804	Predicted ORF in Assemblies 19, 20 and 21; described as similar to S. cerevisiae Cdc1p; induced upon adherence to polystyrene
orf19.4016	orf19.4016	0.00581158	0.430717	-0.000183441	0.993216	-0.00171062	0.819713	-0.0119545	0.502966	Predicted ORF in Assemblies 19, 20 and 21; amphotericin B induced; repressed by nitric oxide; protein level decreased in stationary phase cultures
orf19.4018	orf19.4018	0.0123929	0.221696	0.00367511	0.764123	-0.0033758	0.738658	0.00304949	0.671022	Predicted ORF in Assemblies 19, 20 and 21
orf19.4022	SDH4	0.00276378	0.691657	-0.00945945	0.320909	-0.00479054	0.577589	0.00807813	0.0211995	Succinate dehydrogenase, membrane subunit; transcriptionally regulated by iron; expression greater in high iron
orf19.4024	RIB5	-0.00445727	0.0348256	-0.00708574	0.309715	-9.63666e-05	0.988941	-0.00521215	0.445698	Putative riboflavin synthase; fungal-specific (no human or murine homolog); farnesol-downregulated; protein detected by mass spec in exponential and stationary phase cultures
orf19.4029	orf19.4029	-0.296601	0.0123118	-0.182436	0.127184	-0.128223	0.169464	-0.246076	0.0605836	Predicted ORF in Assemblies 19, 20 and 21
orf19.403	PCL2	0.0120198	0.0246225	0.00449523	0.572053	0.00302493	0.358391	0.00280513	0.652591	Cyclin homolog; reduced expression observed upon depletion of Cln3p; farnesol regulated; periodic mRNA expression, peak at cell-cycle G1/S phase
orf19.4030	orf19.4030	-0.0231833	0.135404	-0.00646192	0.809086	-0.019446	0.760687	-0.000657509	0.985324	Predicted ORF in Assemblies 19, 20 and 21
orf19.4044	MUM2	-0.0218479	0.258168	-0.00420988	0.926824	0.0129986	0.155492	-0.000603547	0.982632	Protein similar to S. cerevisiae Mum2p; transcription is induced in response to alpha pheromone in SpiderM medium; transcription is regulated by Tup1p
orf19.4045	EST1	-0.0472118	0.0322104	-0.0201332	0.332427	-0.027234	0.251519	-0.046884	0.0391162	Telomerase subunit; allosteric activator of catalytic activity, but not required for catalytic activity; has TPR domain
orf19.4046	orf19.4046	-0.0016197	0.762842	-0.00300106	0.678348	-0.00312947	0.619774	0.00100995	0.922367	Putative transcription factor containing a Zn(2)-Cys(6) binuclear cluster; predicted ORF in Assemblies 19, 20 and 21
orf19.4054	CTA24	0.00450059	0.120882	0.00194319	0.748795	0.000529465	0.849485	0.00278014	0.286946	Putative transcriptional activator, downregulated by Efg1p; member of a family of telomere-proximal genes; transcription is upregulated in an RHE model of oral candidiasis
orf19.4055	orf19.4055	0.0144647	0.136667	0.0165446	0.131619	0.00619913	0.304379	0.00511457	0.451634	Protein similar to S. cerevisiae Ybr075wp; transposon mutation affects filamentous growth; clade-associated gene expression
orf19.4056	GAT2	0.00299211	0.366371	-0.000837167	0.936798	-0.000286526	0.944969	-0.00299635	0.614311	Putative DNA-binding transcription factor; similar to S. cerevisiae Gat2p; transposon mutation affects filamentous growth
orf19.4057	orf19.4057	0.00814612	0.012894	-0.00309794	0.772612	0.00535032	0.327484	0.00875992	0.126736	Predicted ORF in Assemblies 19, 20 and 21
orf19.4059	orf19.4059	0.000846237	0.903614	-0.00283746	0.799686	-0.00251427	0.790065	0.0045884	0.351887	Predicted ORF in Assemblies 19, 20 and 21
orf19.4060	ARO4	-0.000669505	0.927242	3.95807e-05	0.995405	0.00417421	0.212719	0.0058971	0.437044	3-Deoxy-D-arabinoheptulosonate-7-phosphate synthase; enzyme of aromatic amino acid biosynthesis; GCN-regulated; feedback-inhibited by tyrosine when produced in S. cerevisiae; fungal-specific; Aro3p and Aro4p catalyze the same reaction
orf19.4061	orf19.4061	0.0032941	0.571425	-0.0117475	0.432999	0.00124194	0.874754	-0.0238874	0.0920479	Predicted ORF in Assemblies 19, 20 and 21; clade-associated gene expression
orf19.4067	FGR18	0.00388566	0.1972	0.00138079	0.757182	0.00193033	0.67156	0.00775236	0.105666	Protein lacking an ortholog in S. cerevisiae; transposon mutation affects filamentous growth; possibly spurious ORF (Annotation Working Group prediction)
orf19.407	GCD6	-0.00648757	0.161916	0.00713395	0.432999	0.00669121	0.493572	-0.00390977	0.422479	Putative catalytic epsilon subunit of the translation initiation factor eIF2B, based on similarity to S. cerevisiae Gcd6p; genes encoding translation factors are downregulated upon phagocytosis by murine macrophage
orf19.4070	orf19.4070	-0.00411861	0.665426	-0.00497427	0.818321	0.00449677	0.57037	0.0008003	0.925929	Predicted ORF in Assemblies 19, 20 and 21
orf19.4077	MIT1	-0.000366739	0.933308	0.00424435	0.125423	0.00136071	0.69789	0.0023913	0.450909	Protein involved in sphingolipid biosynthesis; required for mannosylation of inositol phosphoceramide (IPC) to form mannosylated sphingolipids MIPC and M(IP)2C; fluconazole, caspofungin induced; macrophage-downregulated gene
orf19.4078	orf19.4078	-0.00389255	0.753399	0.00178447	0.811363	0.0057706	0.414224	0.00587835	0.535378	Predicted ORF in Assemblies 19, 20 and 21
orf19.4080	orf19.4080	-0.000456292	0.973414	0.00160081	0.853391	0.000892649	0.86006	-0.000555768	0.917482	Predicted ORF in Assemblies 19, 20 and 21; possibly spurious ORF (Annotation Working Group prediction)
orf19.4081	orf19.4081	0.0144339	0.401264	-0.0304418	0.498329	0.0231737	0.217482	-0.0221092	0.522118	Predicted ORF in Assemblies 19, 20 and 21
orf19.4084	KIS1	0.00814428	0.189201	-0.000695369	0.926552	0.00513274	0.269831	0.00205272	0.705084	Scaffold protein of Snf1p complex; similar to S. cerevisiae Gal83p and Sip2p, with regions of similarity to Sip1p (ASC and KIS domain); interacts with Snf4p
orf19.4085	orf19.4085	0.00251629	0.292461	0.000243823	0.938996	0.0029511	0.298365	-9.28248e-05	0.940715	Predicted ORF in Assemblies 19, 20 and 21
orf19.4089	SGT1	-0.0057796	0.247808	0.00533092	0.463482	0.000559276	0.943015	-0.0168584	0.188497	Predicted ORF in Assemblies 19, 20 and 21; mutation confers hypersensitivity to radicicol
orf19.4090	orf19.4090	0.00316668	0.556426	0.000613103	0.952607	0.000181183	0.97425	-0.000503843	0.975692	Predicted membrane transporter, member of the fucose:proton symporter (FHS) family, major facilitator superfamily (MFS)
orf19.4091	orf19.4091	0.0121556	0.136906	0.00048042	0.988034	0.0146826	0.0666128	0.00815927	0.445384	Predicted ORF in Assemblies 19, 20 and 21
orf19.4093	NOP7	0.0101056	0.302208	0.0238087	0.122351	0.0157641	0.3636	-0.014548	0.160821	Pescadillo homolog required for filament-to-yeast switching; mutation confers hypersensitivity to 5-fluorocytosine (5-FC), 5-fluorouracil (5-FU), and tubercidin (7-deazaadenosine)
orf19.4094	orf19.4094	0.00372771	0.385311	0.00361089	0.272342	0.00407484	0.298365	0.00212401	0.628966	Predicted ORF in Assemblies 19, 20 and 21
orf19.4096	orf19.4096	-0.0358923	0.135553	0.0066059	0.435187	-0.00357892	0.86433	-0.0174451	0.483792	Predicted ORF in Assemblies 19, 20 and 21
orf19.4097	orf19.4097	0.00170165	0.678023	-0.000346968	0.954311	0.00825288	0.122221	0.00535771	0.179141	Predicted ORF in Assemblies 19, 20 and 21
orf19.4101	orf19.4101	0.00500405	0.625349	0.020377	0.0289335	-0.00440143	0.644108	-0.0135919	0.172159	Predicted ORF in Assemblies 19, 20 and 21
orf19.4102	RPN10	-0.00369109	0.761363	0.00557675	0.644377	0.00716833	0.368882	-0.0051418	0.696981	Predicted ORF in Assemblies 19, 20 and 21; macrophage/pseudohyphal-repressed; regulated by Gcn2p and Gcn4p
orf19.4104	orf19.4104	-0.000792416	0.871927	0.00598215	0.291766	0.000979952	0.658192	0.0066817	0.383317	Predicted ORF in Assemblies 19, 20 and 21
orf19.4106	orf19.4106	0.00430661	0.63882	0.00652527	0.664992	0.0104879	0.19496	-0.000277555	0.978469	Predicted ORF in Assemblies 19, 20 and 21
orf19.4107	orf19.4107	-0.00244456	0.503538	0.00228478	0.318604	-0.00673366	0.257209	0.0015607	0.582598	Predicted ORF in Assemblies 19, 20 and 21
orf19.4109	PMT4	0.00572002	0.292461	0.00876823	0.146633	0.00677068	0.171039	0.00465491	0.279749	Protein mannosyltransferase required for normal cell wall composition and full virulence in mouse systemic infection; has roles in hyphal growth and drug sensitivity; one of 5 PMT family members; Axl2p is a substrate
orf19.411	orf19.411	0.00701677	0.0344331	0.00358948	0.485122	0.00555675	0.0753468	0.00399362	0.236497	Protein described as similar to GTPase regulators; possibly spurious ORF (Annotation Working Group prediction); transcriptionally regulated by iron; expression greater in low iron; transcriptionally activated by Mnl1p under weak acid stress
orf19.4114	FAA2-1	0.0114454	0.089472	0.0114146	0.150311	0.00289042	0.673006	0.0106974	0.225983	Predicted long chain fatty acid CoA ligase; upregulated upon phagocytosis; induced by nitric oxide in yhb1 mutant
orf19.4115	orf19.4115	0.00305948	0.855045	-0.00691383	0.757182	-0.00927711	0.232451	0.00267325	0.875503	Predicted ORF in Assemblies 19, 20 and 21
orf19.4116	orf19.4116	-0.00690008	0.348162	-0.0230316	0.224761	-0.00531958	0.594013	0.0117628	0.072644	Protein not essential for viability
orf19.4117	orf19.4117	0.00295192	0.814044	-0.028713	0.528294	-0.0240134	0.120427	0.00956724	0.50862	Protein not essential for viability
orf19.4118	CNT	-0.179511	0.0033368	-0.0936684	0.0795384	-0.0502685	0.13495	-0.0568267	0.0530043	Cation-coupled nucleoside transporter (H(+)/nucleoside symporter); CNT family; transports adenosine, uridine, inosine, guanosine, tubercidin; variant alleles encode high- and low-affinity isoforms; S or G at residue 328 affects specificity
orf19.412	orf19.412	-0.00399538	0.196658	-0.001694	0.791433	-0.00439992	0.365367	0.00235247	0.752906	Predicted ORF in Assemblies 19, 20 and 21
orf19.4120	LAS1	0.00376556	0.677092	0.0186191	0.0100583	0.0102483	0.0884617	-0.00164623	0.922745	Predicted ORF in Assemblies 19, 20 and 21; mutation confers hypersensitivity to 5-fluorocytosine (5-FC), 5-fluorouracil (5-FU); macrophage-induced gene
orf19.4121	orf19.4121	-0.0011492	0.871927	-0.000332921	0.949167	0.00541549	0.197696	0.00419543	0.205986	Predicted ORF in Assemblies 19, 20 and 21
orf19.4122	orf19.4122	0.00658353	0.138146	-0.00110262	0.848028	0.0061672	0.296165	0.0024916	0.495998	Predicted ORF in Assemblies 19, 20 and 21
orf19.4123	orf19.4123	0.0008912	0.806964	-0.00123363	0.817312	-0.00110635	0.641762	0.00168813	0.658482	Predicted ORF in Assemblies 19, 20 and 21
orf19.4125	orf19.4125	0.00964045	0.466724	0.0187248	0.23202	0.00819467	0.435303	0.0154934	0.25613	Putative transcription factor with zinc finger DNA-binding motif
orf19.413.1	RPS27A	0.00146306	0.798019	0.00545974	0.406174	0.00656413	0.304379	0.00736573	0.468094	Predicted ribosomal protein S27; ORF Predicted by Annotation Working Group
orf19.4131	orf19.4131	0.00230451	0.241345	0.0011177	0.66598	0.00102446	0.811178	0.00261473	0.415707	Predicted ORF in Assemblies 19, 20 and 21
orf19.4134	orf19.4134	0.00552208	0.445412	0.00846702	0.406174	0.0064849	0.226804	0.00769573	0.139691	Predicted ORF in Assemblies 19, 20 and 21
orf19.4135	PRC2	-0.00230411	0.568861	-0.00345889	0.814751	0.00159575	0.662153	0.00138356	0.763332	Protein described as a carboxypeptidase; upregulated in the presence of human neutrophils
orf19.414	orf19.414	-0.00824098	0.132434	0.00239624	0.868888	-0.00191772	0.563476	0.00382955	0.552124	Predicted ORF in Assemblies 19, 20 and 21
orf19.4142	orf19.4142	0.00285484	0.339622	0.00408945	0.755226	-0.00256657	0.384447	0.00377461	0.605487	Predicted ORF in Assemblies 19, 20 and 21; decreased transcription is observed upon fluphenazine treatment
orf19.4143	orf19.4143	0.000727007	0.932068	0.0107081	0.0292054	0.00559604	0.368882	0.00354055	0.816369	Predicted ORF in Assemblies 19, 20 and 21
orf19.4144	orf19.4144	0.00890737	0.120882	0.00840258	0.348955	0.00985193	0.115237	0.0096677	0.105666	Predicted ORF in Assemblies 19, 20 and 21; clade-associated gene expression
orf19.4145	ZCF20	-0.000787652	0.92202	0.00245185	0.712257	-0.000657687	0.879272	-0.0109764	0.177652	Predicted zinc-finger protein of unknown function
orf19.4146	SMD3	0.006368	0.304269	-0.00389548	0.876395	0.0100981	0.255867	-0.0119861	0.564827	Protein described as a core snRNP protein; induced upon adherence to polystyrene
orf19.4147	GLR1	0.00204136	0.174871	0.0027685	0.304935	0.00322525	0.158886	0.000239794	0.948996	Glutathione reductase; transcriptionally regulated by Cap1p; upregulated in the presence of human neutrophils; oxidative stress-induced via Cap1p; overexpression correlates with multidrug resistance in a cap1 mutant, farnesol induced
orf19.4148	orf19.4148	0.00113205	0.831499	-0.00260808	0.66598	-0.000806543	0.798638	0.00223335	0.805053	Predicted ORF in Assemblies 19, 20 and 21
orf19.4149	orf19.4149	0.0070438	0.131956	0.0051707	0.552308	0.00515394	0.190946	0.00707423	0.384024	Predicted ORF in Assemblies 19, 20 and 21
orf19.4151	SPO1	-0.0133677	0.44854	-0.012345	0.530646	-0.00644639	0.184777	-0.00046896	0.925929	Protein similar to phospholipase B; fungal-specific (no human or murine homolog)
orf19.4152	CEF3	0.00192202	0.182193	-0.00107881	0.798665	-0.00189484	0.332406	-0.000969943	0.693464	Translation elongation factor 3 (EF-3); antigenic in human; predicted C-term nucleotide-binding active site, poly-Lys region; PROTEIN localizes to surface of yeast form, not hyphae; polystyrene adherence induced; EF-3 is fungal-specific
orf19.4153	orf19.4153	0.00120566	0.480698	-0.000672377	0.883388	0.00637966	0.229152	-0.000767783	0.700899	Predicted ORF in Assemblies 19, 20 and 21
orf19.4157	SPS20	0.00501301	0.386089	0.00940361	0.335721	0.00599942	0.264845	0.00350988	0.661942	Predicted ORF in Assemblies 19, 20 and 21; protein detected by mass spec in stationary phase cultures
orf19.4160	orf19.4160	0.00322217	0.659319	-0.00105467	0.821515	0.00202348	0.530853	-0.0016715	0.585114	Predicted ORF in Assemblies 19, 20 and 21
orf19.4163	orf19.4163	0.00111666	0.767605	-0.00173266	0.821825	0.000386045	0.929689	0.00259235	0.738176	Predicted ORF in Assemblies 19, 20 and 21
orf19.4167	orf19.4167	-0.0130234	0.336888	0.00296716	0.850673	0.00807117	0.121901	0.00673794	0.283982	Predicted ORF in Assemblies 19, 20 and 21
orf19.4169	orf19.4169	-0.0113129	0.00738614	-0.00178476	0.600262	-0.0119177	0.0108633	-0.00230297	0.751593	Predicted ORF in Assemblies 19, 20 and 21; possibly spurious ORF (Annotation Working Group prediction)
orf19.417	orf19.417	0.0101676	0.0953292	-0.00270402	0.860848	0.00491891	0.471907	0.00669414	0.249974	Predicted ORF in Assemblies 19, 20 and 21
orf19.4170	orf19.4170	0.00637325	0.307888	0.00278699	0.612859	0.00592675	0.163292	0.00497777	0.0902023	Predicted ORF in Assemblies 19, 20 and 21
orf19.4171	orf19.4171	0.00170897	0.532568	0.00217478	0.716178	-0.000157452	0.972117	0.00155266	0.763652	Predicted ORF in Assemblies 19, 20 and 21
orf19.4173	orf19.4173	0.0070859	0.112699	0.00133132	0.860142	0.00505031	0.145336	0.00805315	0.17079	Predicted ORF in Assemblies 19, 20 and 21
orf19.4175	TOK1	0.00770443	0.231937	0.00875666	0.463482	0.00821873	0.15125	0.00482412	0.483142	Outwardly rectifying, noisily gated potassium channel; modulates sensitivity to human salivary histatin (Hst5); very similar to S. cerevisiae Tok1p
orf19.418	KOG1	0.00146878	0.828383	0.0132054	0.0785895	-0.00690687	0.286905	0.00700383	0.469996	Protein likely to be essential for growth, based on an insertional mutagenesis strategy; heterozygous null mutant displays sensitivity to rapamycin
orf19.4181	SPC2	-0.000889999	0.845125	0.001301	0.837297	-0.00409249	0.288184	0.000276416	0.94403	Transcription is induced upon filamentous growth
orf19.4182	orf19.4182	-0.000729115	0.92202	-0.00798627	0.326422	-0.000841436	0.894444	0.00625181	0.504305	Predicted ORF in Assemblies 19, 20 and 21
orf19.4183	MUC1	0.00578085	0.578825	0.0109206	0.382331	-0.00538071	0.744587	0.0126625	0.463668	Protein not essential for viability; similar to S. cerevisiae Muc1p, which is a cell surface glycoprotein involved in filamentous growth; decreased transcription is observed upon benomyl treatment
orf19.4184	orf19.4184	0.00270363	0.800313	-0.0104548	0.520731	-0.0101496	0.115237	-0.00127901	0.934853	Predicted ORF in Assemblies 19, 20 and 21
orf19.4185	orf19.4185	0.00727193	0.184443	0.00106659	0.953277	0.00603572	0.218125	0.00738304	0.302732	Predicted ORF in Assemblies 19, 20 and 21
orf19.4186	PCT1	-0.0050328	0.639359	0.00148134	0.914349	0.00495925	0.549657	-0.00317215	0.824513	Putative choline-phosphate cytidylyl transferase, antigenic during human oral infection
orf19.4191.1	orf19.4191.1	0.00489689	0.18349	0.00369806	0.119349	0.00315201	0.370681	0.000783836	0.882055	ORF Predicted by Annotation Working Group
orf19.4193	orf19.4193	-0.00902834	0.137298	-0.0185365	0.029056	-0.00791661	0.205011	-0.00730241	0.160821	Predicted ORF in Assemblies 19, 20 and 21
orf19.4194	orf19.4194	0.00155025	0.708697	-0.00588125	0.406707	0.00464876	0.305513	0.00140886	0.710834	Predicted ORF in Assemblies 19, 20 and 21
orf19.4195	orf19.4195	-0.00685771	0.309839	0.00336183	0.675353	-0.000389613	0.950455	-0.0110244	0.0580663	Predicted ORF in Assemblies 19, 20 and 21
orf19.4195.1	FCA1	-0.000776495	0.781928	0.00131697	0.551338	0.00550124	0.317069	0.00416944	0.202838	Cytosine deaminase; enzyme of pyrimidine salvage; functional homolog of S. cerevisiae Fcy1p; mutation is associated with resistance to flucytosine (5-FC) in a clinical isolate; hyphal downregulated; gene has intron
orf19.4197	YHM2	0.00903598	0.0416939	0.00795896	0.127184	0.00550702	0.275731	0.00632064	0.303657	Alkaline upregulated
orf19.4199	orf19.4199	-0.0282518	0.143644	0.0107344	0.161622	0.0106787	0.217482	0.00820061	0.439792	Predicted ORF in Assemblies 19, 20 and 21
orf19.420	orf19.420	0.0084595	0.162436	0.00863456	0.38262	-0.0455949	0.447473	0.0043765	0.614506	ORF Predicted by Annotation Working Group
orf19.4201	NHX1	0.0137058	0.122998	-0.0146449	0.162128	-0.00389636	0.775544	0.0183132	0.215789	Protein similar to S. cerevisiae Nhx1p, which is an Na+/H+ exchanger required for intracellular sequestration of Na+
orf19.4204	orf19.4204	-0.0322762	0.0170591	-0.0129257	0.656809	-0.0110174	0.447473	-0.015459	0.127364	Predicted ORF in Assemblies 19, 20 and 21
orf19.4205.1	orf19.4205.1	0.00701854	0.185487	0.00138047	0.846132	0.00444341	0.265229	0.00174376	0.806708	ORF Predicted by Annotation Working Group
orf19.4206	orf19.4206	0.00311129	0.479146	0.00155957	0.781237	-0.00241706	0.440778	0.00427575	0.769311	Predicted ORF in Assemblies 19, 20 and 21
orf19.4208	RAD52	0.00303425	0.489007	0.000128992	0.980863	0.00648579	0.0868035	0.00293405	0.484322	Required for homologous DNA recombination, repair of UV- or MMS-damaged DNA, telomere length, UV-induced LOH; constitutive expression, MMS-induced; weakly complements S. cerevisiae rad52 mutant; slow growth, increased white-to-opaque switch
orf19.4209	orf19.4209	-0.0248764	0.0593045	0.013142	0.776768	-0.0151656	0.355652	-0.00706524	0.525148	Predicted ORF in Assemblies 19, 20 and 21
orf19.4212	FET99	0.00645874	0.391334	0.00819479	0.446026	0.00903836	0.190946	0.008594	0.192377	Protein of multicopper oxidase family; similar to S. cerevisiae Fet3p; does not functionally complement S. cerevisiae fet3 mutant growth under low-iron conditions; iron-repressed transcription; regulated by Tup1p, Rim101p
orf19.4213	FET31	0.0010695	0.929673	0.00816804	0.150708	0.00222182	0.500731	0.00253003	0.511298	Predicted ORF in Assemblies 19, 20 and 21; flucytosine induced; caspofungin repressed
orf19.4214	orf19.4214	-3.31692e-05	0.995948	0.009021	0.58203	-0.00633017	0.630135	-0.0161917	0.416193	Protein not essential for viability
orf19.4216	orf19.4216	-0.00435778	0.692991	0.00713049	0.1464	0.00329588	0.300436	0.00229744	0.356483	Predicted ORF in Assemblies 19, 20 and 21; decreased expression in hyphae compared to yeast-form cells; transcription is increased in populations of cells exposed to fluconazole over multiple generations
orf19.4217	orf19.4217	0.00119286	0.64651	0.00142355	0.680045	0.00200931	0.600107	0.00207424	0.516238	ORF Predicted by Annotation Working Group
orf19.422	SPT20	0.00812503	0.031548	0.00670083	0.140117	0.00224714	0.712391	0.00283862	0.538606	Protein described as a transcription factor; downregulated upon adherence to polystyrene; flucytosine repressed
orf19.4221	ORC4	0.00465717	0.331969	-0.0165751	0.29148	0.00182089	0.600107	0.00472468	0.192377	Phosphorylated protein similar to S. cerevisiae Orc4p; transcription is induced in response to alpha pheromone in SpiderM medium
orf19.4223	GCD11	-0.0282756	0.167575	-0.056561	0.0289335	-0.0250017	0.316838	-0.00146288	0.952504	Protein similar to S. cerevisiae Gcd11p, which is a subunit of translation initiation factor eIF2; likely to be essential for growth, based on an insertional mutagenesis strategy
orf19.4225	LEU3	0.00666552	0.292817	0.00431801	0.580614	0.00723255	0.165138	-0.00903212	0.202141	Predicted zinc-finger protein; has similarity to S. cerevisiae Leu3p, which is involved in regulation of branched-chain amino acid biosynthesis genes; alkaline upregulated; transcriptionally activated by Mnl1p under weak acid stress
orf19.4227	orf19.4227	0.00834913	0.0603715	-5.61903e-05	0.995883	0.00406705	0.311658	0.00231642	0.581824	Predicted ORF in Assemblies 19, 20 and 21; possibly spurious ORF (Annotation Working Group prediction)
orf19.4228	orf19.4228	0.00737503	0.249408	0.00742693	0.43196	0.0072707	0.341316	0.00892072	0.453697	Predicted ORF in Assemblies 19, 20 and 21
orf19.4229	orf19.4229	0.00624775	0.108342	0.000957254	0.930664	0.00379162	0.390982	0.00656883	0.161294	Predicted ORF in Assemblies 19, 20 and 21
orf19.4230	orf19.4230	0.00237431	0.800897	-0.00740032	0.335885	0.000660369	0.86433	0.000157781	0.972172	Predicted ORF in Assemblies 19, 20 and 21; protein detected by mass spec in exponential and stationary phase cultures
orf19.4232	PTH1	0.00821111	0.238427	0.00388169	0.643604	0.0108404	0.071427	0.00881937	0.10549	Putative gluconate transport protein; antigenic during human oral infection
orf19.4235	PDE1	0.0128018	0.230893	0.0122459	0.514707	0.0234077	0.0971721	0.0053713	0.81238	Cyclic nucleotide phosphodiesterase (PDEase), low affinity; has activity toward cGMP and cAMP; not divalent cation-dependent; complements defects of an S. cerevisiae mutant lacking PDEase; macrophage-downregulated gene
orf19.424	TRP99	0.000478471	0.921439	0.00588902	0.498686	-0.00122223	0.860564	0.0104484	0.0781256	Protein described as thioredoxin peroxidase/alkyl hydroperoxide reductase; transcriptionally regulated by iron; expression greater in low iron; regulated by Gcn4p; induced in response to amino acid starvation (3-aminotriazole treatment)
orf19.4240	orf19.4240	0.000176862	0.970831	-0.00589178	0.745742	-0.00766452	0.345476	-0.00612027	0.318788	Predicted ORF in Assemblies 19, 20 and 21
orf19.4242	CST20	-0.0122738	0.298978	0.00177604	0.841999	-0.00538035	0.585637	-0.00484954	0.464445	Protein kinase of Ste20p/p65PAK family, required for wild-type mating efficiency and virulence in a mouse model; Cst20p-Hst7p-Cek1p-Cph1p MAPK pathway regulates some hyphal growth; involved in Cdc42p growth regulation
orf19.4243	orf19.4243	0.00596674	0.00717809	0.00509113	0.214658	0.000729794	0.887899	0.00393426	0.255182	Predicted ORF in Assemblies 19, 20 and 21; not essential for viability; similar to S. cerevisiae Cue2p, which is a protein containing two CUE domains that bind ubiquitin
orf19.4244	orf19.4244	0.00616852	0.307737	0.00480769	0.626239	0.00496048	0.344626	0.00277185	0.523058	Protein not essential for viability
orf19.4245	orf19.4245	0.000796061	0.853042	0.00137772	0.829366	-0.000761435	0.861846	0.0024629	0.549676	Predicted ORF in Assemblies 19, 20 and 21
orf19.4246	orf19.4246	0.000916229	0.803702	0.000534974	0.944802	0.00079113	0.873863	0.000787296	0.682911	Predicted ORF in Assemblies 19, 20 and 21; similar to S. cerevisiae Ykr070wp; transposon mutation affects filamentous growth; Hog1p-downregulated; shows colony morphology-related gene regulation by Ssn6p; induced during cell wall regeneration
orf19.4247	orf19.4247	-0.00414306	0.541315	8.44721e-05	0.994198	-0.00634599	0.480386	-0.0374903	0.0622714	Predicted ORF in Assemblies 19, 20 and 21
orf19.4248	orf19.4248	0.010058	0.0495135	0.00284594	0.587173	0.00469658	0.250178	0.00964998	0.0813027	Predicted ORF in Assemblies 19, 20 and 21; regulated by Gcn4p; repressed in response to amino acid starvation (3-aminotriazole treatment)
orf19.425	orf19.425	0.010859	0.162436	0.00365471	0.889204	0.00936138	0.250533	0.00336185	0.766469	Protein not essential for viability
orf19.4251	ZCF22	0.00585129	0.183213	0.0103185	0.0931381	0.000605503	0.909692	0.00748403	0.102607	Predicted zinc-finger protein of unknown function
orf19.4252	orf19.4252	0.0123087	0.0606657	0.00694512	0.686664	0.00992142	0.160468	-0.00746961	0.101782	Predicted ORF in Assemblies 19, 20 and 21
orf19.4253	orf19.4253	0.0105484	0.0489535	0.00127897	0.885372	0.0114714	0.0831067	0.0124085	0.0842617	Predicted ORF in Assemblies 19, 20 and 21
orf19.4255	ECM331	-0.000432905	0.94344	0.00127999	0.960344	0.0028888	0.778575	0.00841094	0.348507	GPI-anchored protein; mainly at plasma membrane, also at cell wall; caspofungin induced; Plc1p-regulated; repressed by Rim101p, Hog1p; colony morphology-related gene regulation by Ssn6p; induced in cyr1 homozygous null mutant yeast-form cel
orf19.4257	INT1	0.00257588	0.780246	-0.00379524	0.748083	-0.00263136	0.857547	0.0136793	0.0579125	Integrin-like protein; role in morphogenesis, adhesion, and mouse cecal colonization and systemic virulence; similar to S. cerevisiae Bud4p (has role in bud site selection); structurally similar to alpha-subunit of human leukocyte integrins
orf19.4258	orf19.4258	0.0117482	0.00927481	0.00500521	0.480457	0.00962951	0.0666128	0.0103974	0.059217	Putative protein of unknown function; heterozygous null mutant exhibits hypersensitivity to parnafungin and cordycepin in the C. albicans fitness test; predicted ORF in Assemblies 19, 20 and 21
orf19.426	orf19.426	0.0045306	0.180244	0.00335902	0.397231	0.00137752	0.82416	0.0082979	0.106239	Predicted ORF in Assemblies 19, 20 and 21
orf19.4265	UAP1	0.00522825	0.350425	0.000743616	0.869198	0.000105806	0.955069	-0.000464366	0.909052	UDP-N-acetylglucosamine pyrophosphorylase, catalyzes biosynthesis of UDP-N-acetylglucosamine from UTP and N-acetylglucosamine 1-phosphate; functional homolog of S. cerevisiae Qri1p; alkaline upregulated
orf19.4268	UTP13	0.00430014	0.463298	0.00334583	0.805263	-0.00670363	0.226081	-0.00843057	0.092746	Predicted ORF in Assemblies 19, 20 and 21; downregulated in core stress response; physically interacts with TAP-tagged Nop1p
orf19.4269	orf19.4269	0.00225644	0.406264	-0.000665991	0.814547	0.00393479	0.367148	0.00252702	0.291809	Predicted ORF in Assemblies 19, 20 and 21
orf19.4270	orf19.4270	-0.0159641	0.00710108	-0.0118009	0.029056	-0.0373204	0.115968	-0.0168381	0.0734098	Predicted ORF in Assemblies 19, 20 and 21
orf19.4275	RAD9	0.00125843	0.646229	0.0022675	0.552117	-0.000446445	0.895598	0.00250227	0.535378	Protein involved in regulation of DNA-damage-induced filamentous growth; putative component of DNA damage checkpoint; ortholog of S. cerevisiae Rad9p; transcription is induced in response to alpha pheromone in SpiderM medium
orf19.4278	orf19.4278	0.0106375	0.0606657	0.00476514	0.528294	0.00310244	0.480386	0.00797446	0.166106	Predicted ORF in Assemblies 19, 20 and 21
orf19.4279	MNN1	-0.00936309	0.198076	-0.00144679	0.856384	-0.00196597	0.760156	0.00176812	0.871895	Putative alpha-1,3-mannosyltransferase, a component of mannosyltransferase complex; transcription is negatively regulated by Rim101p; transcription is elevated in chk1 and nik1 homozygous null mutants, but not in the sln1 null mutant
orf19.428	orf19.428	0.0043907	0.328306	0.0018385	0.866902	0.00179511	0.761375	0.00036763	0.930079	Predicted ORF in Assemblies 19, 20 and 21; induced during planktonic growth
orf19.4280	orf19.4280	0.00698865	0.0974777	0.00764688	0.108851	0.00220984	0.345589	0.0070608	0.279021	Predicted ORF in Assemblies 19, 20 and 21; possibly spurious ORF (Annotation Working Group prediction)
orf19.4282	orf19.4282	0.00146608	0.820324	0.00828972	0.401328	0.00491506	0.227711	0.0004458	0.939496	Predicted ORF in Assemblies 19, 20 and 21; greater mRNA abundance observed in a cyr1 homozygous null mutant than in wild type; possibly spurious ORF (Annotation Working Group prediction)
orf19.4283	orf19.4283	-0.0148311	0.264135	0.00849916	0.426585	0.0229414	0.0610342	0.0133902	0.246016	Predicted ORF in Assemblies 19, 20 and 21
orf19.4286	orf19.4286	0.0127751	0.0115032	-0.000665593	0.936798	-0.00290255	0.786155	-0.000424884	0.961267	Predicted ORF in Assemblies 19, 20 and 21; possibly spurious ORF (Annotation Working Group prediction)
orf19.4288	CTA7	-0.00897143	0.334058	-0.000508858	0.97848	0.008942	0.0889673	-0.00719214	0.490251	Predicted zinc-finger protein of unknown function; activates transcription in 1-hybrid assay in S. cerevisiae; has similarity to S. cerevisiae Stb4p
orf19.429	orf19.429	0.00593277	0.760938	-0.0127503	0.67709	-0.000828116	0.970837	0.0144086	0.582881	Predicted ORF in Assemblies 19, 20 and 21; repressed by nitric oxide
orf19.4290	TRR1	-0.0240219	0.0185328	-0.0177164	0.00522976	-0.0149489	0.102779	-0.0102804	0.0256576	Putative thioredoxin reductase; upregulated in presence of human neutrophils; regulated by Tsa1p, Tsa1Bp; induced by nitric oxide; peroxide-induced; oxidative stress-induced via Cap1p; fungal-specific (no human/murine homolog)
orf19.4292	orf19.4292	0.0010437	0.916281	-0.00136726	0.854597	0.000880817	0.914283	0.00104799	0.932386	Predicted ORF in Assemblies 19, 20 and 21
orf19.4293	orf19.4293	-0.00570853	0.228964	-0.00107512	0.848028	-0.00260913	0.632083	-0.00277112	0.676598	Predicted ORF in Assemblies 19, 20 and 21
orf19.4295	orf19.4295	-0.00166535	0.578639	0.00756922	0.339469	-0.00407766	0.410477	-0.00362496	0.617773	Predicted ORF in Assemblies 19, 20 and 21
orf19.4297	CKB2	0.00250414	0.839589	-0.00915786	0.344141	-0.00981889	0.223482	-0.00877885	0.363268	Regulatory subunit of protein kinase CK2 (casein kinase II), beta' subunit
orf19.4299	MSW1	-0.00537602	0.622601	0.00261847	0.906127	0.00504335	0.619774	0.00433091	0.669919	Protein likely to be essential for growth, based on an insertional mutagenesis strategy; similar to S. cerevisiae Msw1p, which is mitochondrial tryptophanyl-tRNA synthetase
orf19.4301	orf19.4301	0.00139686	0.736402	0.000882219	0.800976	0.000694592	0.819713	0.00163541	0.59198	Predicted ORF in Assemblies 19, 20 and 21
orf19.4304	GAP1	0.00218236	0.619837	0.00213727	0.568696	-0.00304557	0.659287	0.00206817	0.504714	General amino acid permease; antigenic in human, mouse; 10-12 transmembrane regions; regulated by nitrogen source; alkaline, GlcNAc, phagocytosis upregulated; not required for virulence in mouse systemic infection; fungal-specific
orf19.4305	orf19.4305	0.000313792	0.950991	-0.00288924	0.432947	0.00520899	0.327	0.00130891	0.742906	Predicted ORF in Assemblies 19, 20 and 21
orf19.4305.1	orf19.4305.1	-0.000457835	0.92202	0.00251803	0.411785	0.000823931	0.824709	0.00117604	0.554347	ORF Predicted by Annotation Working Group
orf19.4306	orf19.4306	0.00673965	0.263194	0.0038756	0.623509	0.00833833	0.354707	0.0119638	0.069441	Predicted ORF in Assemblies 19, 20 and 21
orf19.4307	orf19.4307	0.000564004	0.933958	0.00329642	0.533615	-0.000901925	0.853103	0.00196793	0.787096	Predicted ORF in Assemblies 19, 20 and 21
orf19.4308	HSL1	-0.00716169	0.489007	-0.00312187	0.799686	-0.00838941	0.235811	-0.00994846	0.294051	Probable protein kinase, involved in determination of morphology during the cell cycle of both yeast-form cells and hyphae via regulation of Swe1p and Cdc28p; required for full virulence and kidney colonization in mouse systemic infection
orf19.431	ZCF2	0.0117744	0.271833	-0.00180169	0.960344	0.00297006	0.820184	-0.00765361	0.771457	Putative transcription factor with zinc cluster DNA-binding motif
orf19.4310	orf19.4310	-0.00394058	0.120882	-0.000344191	0.959054	-0.0101877	0.00553821	-0.0105161	0.120754	Predicted ORF in Assemblies 19, 20 and 21
orf19.4311	YNK1	0.00600585	0.410265	0.0100508	0.425896	-0.00551976	0.721443	0.00737764	0.736854	Nucleoside diphosphate kinase (NDP kinase); homo-hexameric; soluble protein in hyphae; flucytosine induced; biofilm induced; macrophage-induced protein; protein detected by mass spec in stationary phase cultures
orf19.4312	orf19.4312	-0.00064028	0.88527	0.00152416	0.84441	0.000810025	0.828836	0.00729823	0.342407	Predicted ORF in Assemblies 19, 20 and 21
orf19.4318	MIG1	0.004837	0.124754	0.00329865	0.369007	-0.00157476	0.712391	-5.01703e-05	0.987889	Transcriptional repressor; regulates genes for utilization of carbon sources; Tup1p-dependent and -independent functions; upregulated in biofilm; hyphal downregulated; caspofungin repressed; functional homolog of S. cerevisiae Mig1p
orf19.4321	orf19.4321	0.000243728	0.952074	-0.00771345	0.540072	0.0050229	0.182161	-0.00113743	0.816369	Predicted ORF in Assemblies 19, 20 and 21
orf19.4324	orf19.4324	-0.000960876	0.936848	0.00669469	0.632416	0.00611652	0.480386	-0.00747457	0.313181	Predicted ORF in Assemblies 19, 20 and 21
orf19.4328	CCC2	-0.000507544	0.929673	0.0026283	0.517438	0.00111571	0.8353	-0.000288217	0.925044	Copper-transporting P-type ATPase of Golgi; required for wild-type iron assimilation (indirect effect via Fet3p); induced by iron starvation, ciclopirox olamine; caspofungin repressed; not required for virulence in mouse systemic infection
orf19.433	orf19.433	0.00141945	0.781509	7.66885e-05	0.993833	-0.00117696	0.874706	0.00607479	0.710129	Predicted ORF in Assemblies 19, 20 and 21
orf19.4332	orf19.4332	-0.00228247	0.829352	0.0066409	0.142995	0.00980563	0.104064	0.0103933	0.166106	Predicted ORF in Assemblies 19, 20 and 21; possibly spurious ORF (Annotation Working Group prediction)
orf19.4335	TNA1	0.00355228	0.484468	-0.00523985	0.418275	0.00254664	0.461737	0.00218792	0.721277	Putative nicotinic acid transporter; fungal-specific (no human or murine homolog); detected at germ tube plasma membrane by mass spectrometry; transcriptionally induced upon phagocytosis by macrophage
orf19.434	PRD1	-0.24776	0.017909	-0.314354	0.0151446	-0.157378	0.075312	-0.27109	0.0196677	Transcription is regulated by Nrg1p, Mig1p, and Tup1p; Hog1p-induced
orf19.4341	orf19.4341	0.00919077	0.340809	0.00160731	0.932361	0.00820694	0.40168	0.00816041	0.383317	Predicted ORF in Assemblies 19, 20 and 21
orf19.4346	orf19.4346	-0.00939452	0.263344	-0.0167482	0.263306	0.00693591	0.367947	-0.00568876	0.426407	Predicted ORF in Assemblies 19, 20 and 21
orf19.4347	orf19.4347	0.0124988	0.00338819	-0.00284248	0.863955	-0.000900158	0.888913	0.00667143	0.0833176	Predicted ORF in Assemblies 19, 20 and 21; Hog1p-induced
orf19.4349	orf19.4349	0.00233858	0.58355	-0.000984287	0.939494	0.00110115	0.871275	0.00932374	0.582002	Protein of unknown function, transcription is repressed in the presence of elevated CO2; predicted ORF in Assemblies 19, 20 and 21
orf19.4353	ULP2	-0.000297987	0.94584	0.000785296	0.928281	0.00326933	0.10316	0.00329912	0.506465	Putative SUMO deconjugation enzyme that removes the small ubiquitin-like modifier (SUMO) from proteins
orf19.4357	orf19.4357	0.00220429	0.722633	0.00381131	0.266668	-0.00491306	0.400904	-0.00532075	0.0896251	Putative protein of unknown function; has similarity to S. cerevisiae Mgr3p, which is a subunit of the i-AAA protease supercomplex that degrades misfolded mitochondrial proteins; predicted ORF in Assemblies 19, 20 and 21
orf19.4358	orf19.4358	0.000771775	0.959075	-0.00056789	0.97848	-0.002998	0.8626	0.00751143	0.537541	Predicted ORF in Assemblies 19, 20 and 21
orf19.4361	IFF3	0.00635989	0.195387	-0.000664635	0.926552	0.00244105	0.696246	0.00514864	0.506465	Putative GPI-anchored protein of unknown function
orf19.4362	orf19.4362	0.0138578	0.035056	0.0111072	0.23473	0.00480947	0.310698	0.0159311	0.152835	Predicted ORF in Assemblies 19, 20 and 21
orf19.4363	SGD1	-0.0485224	0.0321816	-0.0235593	0.156287	-0.0261341	0.0291488	-0.0399765	0.0249373	Predicted ORF in Assemblies 19, 20 and 21; downregulated during core stress response; transcription is increased in populations of cells exposed to fluconazole over multiple generations
orf19.4365	orf19.4365	0.00145829	0.87023	0.00416261	0.644833	0.0018196	0.519005	0.0100568	0.0400431	Predicted ORF in Assemblies 19, 20 and 21
orf19.4366	orf19.4366	0.00352069	0.490646	0.0042373	0.830659	0.00423616	0.153323	-0.00602092	0.160821	Predicted ORF in Assemblies 19, 20 and 21
orf19.4368	orf19.4368	-0.015402	0.11499	-0.017804	0.58203	0.00471445	0.447803	-0.0428468	0.0637623	Predicted ORF in Assemblies 19, 20 and 21
orf19.4369	orf19.4369	0.00735857	0.305689	0.00577024	0.759098	0.00656558	0.217482	-0.012845	0.121746	Protein not essential for viability
orf19.437	GRS1	0.00675866	0.104913	0.0127135	0.206848	0.00808393	0.200967	-0.0018461	0.792906	Putative tRNA-Gly synthetase; genes encoding ribosomal subunits, translation factors, and tRNA synthetases are downregulated upon phagocytosis by murine macrophage; protein detected by mass spec in stationary phase cultures
orf19.4370	orf19.4370	-0.00214492	0.579474	0.00283708	0.23202	0.000612478	0.895598	0.000571721	0.827828	Predicted ORF in Assemblies 19, 20 and 21; induced by nitric oxide; oxidative stress-induced via Cap1p; fungal-specific (no human or murine homolog)
orf19.4371	TAL1	0.00262937	0.619896	0.00860992	0.132504	0.00349511	0.277548	0.00774739	0.202838	Predicted ORF in Assemblies 19, 20 and 21; biofilm induced; oxidative stress-induced via Cap1p; induced by nitric oxide in yhb1 mutant; protein detected by mass spec in exponential and stationary phase cultures
orf19.4374	PRP42	-0.000191843	0.966882	0.00561446	0.322916	0.00232178	0.53202	0.00333436	0.28971	Putative component of the U1 snRNP, involved in splicing; ortholog of S. cerevisiae PRP42; predicted ORF in Assemblies 19, 20 and 21
orf19.4375	orf19.4375	-0.00525124	0.331969	-0.00208732	0.920644	-0.00405521	0.651842	-0.00225523	0.727776	Predicted ORF in Assemblies 19, 20 and 21
orf19.4375.1	RPS30	-0.0764426	0.00604359	-0.105738	0.00407106	-0.0851832	0.00409295	-0.132754	0.00352448	ORF Predicted by Annotation Working Group; putative 40S ribosomal protein S30; shows colony morphology-related gene regulation by Ssn6p
orf19.4376	orf19.4376	0.00583412	0.43554	-0.00713841	0.320301	-0.0045851	0.757932	0.00872536	0.213852	Predicted ORF in Assemblies 19, 20 and 21
orf19.4378	orf19.4378	0.000805491	0.917038	-0.00869351	0.216308	-0.00903492	0.331534	-0.00835015	0.343969	Predicted ORF in Assemblies 19, 20 and 21
orf19.438	orf19.438	0.00303378	0.356691	0.00621736	0.514836	0.0107724	0.0673685	-0.0101153	0.202838	Predicted ORF in Assemblies 19, 20 and 21
orf19.4381	VTC3	0.00433646	0.433539	-0.00364295	0.49748	0.00605902	0.0582151	0.00266668	0.742906	Putative polyphosphate synthetase; downregulated in core caspofungin response; Hog1p-induced; transcription is opaque-specific; fungal-specific (no human or murine homolog)
orf19.4383	orf19.4383	-0.00502951	0.263503	0.00448563	0.800242	0.00551846	0.0818251	0.00154507	0.787588	Predicted ORF in Assemblies 19, 20 and 21
orf19.4384	HXT5	-0.0983743	0.124443	-0.00928597	0.952735	-0.0786263	0.296206	-0.0566146	0.475604	Protein described as a sugar transporter; transcription is upregulated in response to treatment with ciclopirox olamine; Snf3p-induced; alkaline downregulated; shows colony morphology-related gene regulation by Ssn6p
orf19.439	orf19.439	0.00347359	0.42616	0.00322386	0.676037	0.000947763	0.861846	-0.000951124	0.876035	Predicted ORF in Assemblies 19, 20 and 21
orf19.4390	orf19.4390	0.00187433	0.747873	0.00104218	0.846265	0.00325808	0.483156	0.00321042	0.473584	Predicted ORF in Assemblies 19, 20 and 21; transcription is repressed in response to alpha pheromone in SpiderM medium; transcriptionally activated by Mnl1p under weak acid stress
orf19.4391	orf19.4391	-0.00251665	0.660409	0.00810446	0.0929926	0.00105654	0.814058	0.00333666	0.527917	Predicted ORF in Assemblies 19, 20 and 21
orf19.4392	DEM1	0.00667691	0.175409	0.010787	0.0789175	-0.00430007	0.764816	0.00910081	0.178134	Predicted ORF in Assemblies 19, 20 and 21; alpha-factor induced
orf19.4393	CIT1	0.00232043	0.728806	0.00189399	0.860475	-0.00730794	0.59438	-0.0013282	0.844999	Protein described as citrate synthase; soluble protein in hyphae; biofilm induced; expression greater in high iron; upregulated upon phagocytosis; Hog1p-downregulated; regulated by Efg1p under yeast-form but not hyphal growth conditions
orf19.4396	orf19.4396	0.00609704	0.199721	0.00231024	0.67045	0.00354433	0.579915	0.00836632	0.343686	Predicted ORF in Assemblies 19, 20 and 21
orf19.4398	orf19.4398	0.00559581	0.155293	0.00926837	0.142995	0.00172745	0.723383	0.00513375	0.385041	Predicted ORF in Assemblies 19, 20 and 21
orf19.4399	orf19.4399	0.0131377	0.381416	0.0179098	0.185448	0.00355126	0.757932	-0.00152477	0.959933	Predicted ORF in Assemblies 19, 20 and 21
orf19.4400	orf19.4400	-0.00199576	0.684711	0.00352178	0.38113	0.000290393	0.956439	0.00598815	0.419995	Predicted ORF in Assemblies 19, 20 and 21; possibly spurious ORF (Annotation Working Group prediction)
orf19.4401	YVH1	0.0023984	0.379241	0.00193199	0.624176	0.00104578	0.824709	0.00189741	0.523305	Putative dual specificity phosphatase (phosphoserine/threonine and phosphotyrosine phosphatase); similar to S. cerevisiae Yvh1p; required for wild-type growth rate and for wild-type virulence in mouse model of systemic infection
orf19.4403	VPS11	0.000594405	0.926334	0.00102809	0.830659	0.00357046	0.627012	0.00774926	0.1465	Protein involved in protein trafficking; putative role in vesicle-target membrane fusion; mutant lacks vacuole; role in hyphal growth, possibly via vacuole expansion into hypha; role in killing of and survival within macrophage
orf19.4404	PGA49	0.00338227	0.51024	-0.00298353	0.780696	0.00937879	0.0090548	0.0076227	0.105666	Putative GPI-anchored protein of unknown function
orf19.4407	orf19.4407	0.00266251	0.450537	0.00290305	0.33585	0.00213419	0.40533	8.90069e-05	0.978469	Predicted ORF in Assemblies 19, 20 and 21
orf19.4409	orf19.4409	0.0058193	0.379241	0.0113062	0.022561	0.00774737	0.0970474	0.008266	0.139209	Protein not essential for viability
orf19.4410	ALG1	-0.00439164	0.567171	0.00347212	0.754624	0.00483359	0.270341	0.0109173	0.240256	Protein likely to be essential for growth, based on an insertional mutagenesis strategy; similar to S. cerevisiae Alg1p, which is a mannosyltransferase involved in N-linked protein glycosylation
orf19.4411	HOS1	-0.0028482	0.650469	0.00236705	0.891601	-0.00893654	0.562382	-0.0046366	0.0849007	Histone deacetylase; similar to S. cerevisiae Hos1p; has conserved deacetylation motif; slightly greater expression in white cells than in opaque cells
orf19.4412	orf19.4412	-0.00919471	0.381416	0.00946319	0.807253	0.00563204	0.595237	-0.0100424	0.505287	Predicted ORF in Assemblies 19, 20 and 21
orf19.4413	CMD1	0.000302213	0.956228	0.00247298	0.288949	-0.00417716	0.552538	-0.000428178	0.894692	Calmodulin; calmodulin inhibitors cause a defect in hyphal growth; not transcriptionally regulated by yeast-hyphal transition; mutation confers hypersensitivity to cytochalasin D and high concentrations of tunicamycin; gene has intron
orf19.4414	orf19.4414	0.00434278	0.045465	-0.00116278	0.863569	0.00201991	0.269566	0.00419501	0.515722	Predicted ORF in Assemblies 19, 20 and 21; possibly spurious ORF (Annotation Working Group prediction)
orf19.4415	orf19.4415	0.00699103	0.284832	0.0120319	0.0695113	-0.00442633	0.625592	-0.00272475	0.816369	Predicted ORF in Assemblies 19, 20 and 21; possibly spurious ORF (Annotation Working Group prediction)
orf19.4416	VPS13	0.00476368	0.510603	-0.00519878	0.779406	0.00144977	0.639695	-0.00417793	0.626229	Predicted ORF in Assemblies 19, 20 and 21; gene used for multilocus sequence typing
orf19.4418	FMT1	-0.0033501	0.267261	0.00317626	0.273215	0.00437469	0.408568	0.00129012	0.836395	Protein described as a methionyl-tRNA transformylase; induced upon adherence to polystyrene
orf19.4427	SKP1	-0.00672702	0.304173	0.0011267	0.950589	-0.00698308	0.270291	-0.00383327	0.548801	Protein described as subunit D of kinetochore protein complex CBF3; regulated by Gcn4p; repressed in response to amino acid starvation (3-aminotriazole treatment)
orf19.4428	orf19.4428	0.0028476	0.720738	-0.00202068	0.846631	0.00821338	0.187378	-0.00218336	0.917071	Protein not essential for viability
orf19.4430	orf19.4430	-0.0173026	0.459031	-0.0274006	0.518825	-0.00611118	0.790065	-0.0144525	0.348553	Predicted ORF in Assemblies 19, 20 and 21
orf19.4432	KSP1	-0.00792259	0.212245	0.00251763	0.735674	0.00166226	0.806898	0.00187565	0.836897	Predicted ORF in Assemblies 19, 20 and 21; mutation confers hypersensitivity to amphotericin B
orf19.4433	CPH1	-0.00117354	0.92202	-0.00250525	0.805263	0.00721781	0.171455	0.00975354	0.0886839	Transcription factor required for mating and hyphal growth on solid media; with Efg1p required for host cytokine response; in filamentation pathway with Ess1p and Czf1p; regulates genes of galactose metabolism
orf19.4435	orf19.4435	0.0069356	0.217368	0.002473	0.821515	0.00722347	0.158736	0.0118442	0.0764627	Predicted ORF in Assemblies 19, 20 and 21
orf19.4436	orf19.4436	0.0151804	0.0703301	0.00869823	0.361425	0.0173786	0.106019	0.0176274	0.0377472	Predicted ORF in Assemblies 19, 20 and 21
orf19.4437	orf19.4437	-0.000996062	0.933958	-0.00604702	0.801435	0.00613702	0.56441	-0.0103965	0.548801	Predicted ORF in Assemblies 19, 20 and 21
orf19.4439	orf19.4439	0.00449982	0.479517	-0.00119815	0.922585	0.00423006	0.370667	0.00202563	0.666614	Predicted ORF in Assemblies 19, 20 and 21
orf19.4441	orf19.4441	3.01108e-05	0.995179	0.00200848	0.727335	-0.00295205	0.622533	0.00181824	0.580284	Predicted ORF in Assemblies 19, 20 and 21
orf19.4442	ALG9	0.00587592	0.53579	0.000441845	0.975529	-0.00529003	0.452526	-0.00231265	0.809348	Putative mannosyltransferase; similar to S. cerevisiae Alg9p; has HKEXRF motif
orf19.4443	YPD1	-0.00736985	0.259817	-0.00084031	0.936798	-0.00883081	0.177327	-0.0139834	0.157766	Phosphohistidine intermediate protein in a phosphorelay signal transduction pathway; residue His69 is the phosphoacceptor histidine; predicted to be soluble and cytosolic; functional homolog of S. cerevisiae Ypd1p
orf19.4446	orf19.4446	-0.00541071	0.439073	0.00232126	0.781183	0.00997927	0.0962825	0.00481862	0.772076	Protein similar to ammomium permeases that is probably inactive, as a mep2 mep3 double homozygous null mutation abolishes cellular ammomium permease activity; fungal-specific (no human or murine homolog)
orf19.4448	SOG2	0.00159552	0.831077	-0.0637253	0.43196	0.00344597	0.424147	0.00380912	0.606289	Leucine-rich-repeat domain protein of RAM cell wall integrity signaling network; role in cell separation, azole sensitivity; required for hyphal growth; lacks orthologs in higher eukaryotes
orf19.4450	ZCF23	0.00186147	0.86905	-0.000380623	0.975404	0.00211684	0.804878	0.00739708	0.236471	Predicted zinc-finger protein of unknown function
orf19.4450.1	orf19.4450.1	0.0023167	0.712058	0.000649117	0.94786	0.00325275	0.69717	0.00100224	0.83953	ORF Predicted by Annotation Working Group
orf19.4451	RIA1	-0.0153227	0.169456	0.00426403	0.818829	-0.018508	0.373433	-0.0246524	0.407725	Putative translation elongation factor; genes encoding ribosomal subunits, translation factors, and tRNA synthetases are downregulated upon phagocytosis by murine macrophage
orf19.4455	orf19.4455	0.00226123	0.792009	0.00390441	0.592495	0.00360025	0.590324	-0.00807806	0.597562	Predicted ORF in Assemblies 19, 20 and 21
orf19.4457	BNI4	0.00248914	0.625349	-0.000280352	0.952607	-0.0015166	0.585637	-0.000422177	0.909371	Protein required for wild-type cell wall chitin distribution, morphology, hyphal growth; not essential; similar to S. cerevisiae Bni4p (targeting subunit for Glc7p phosphatase, involved in bud-neck localization of chitin synthase III)
orf19.4459	orf19.4459	0.0085636	0.265548	0.0141796	0.0796492	0.00879666	0.306385	0.00507663	0.502767	Predicted ORF in Assemblies 19, 20 and 21; similar to S. cerevisiae Ynl234wp, which is a putative heme-binding stress-related protein; transposon mutation affects filamentous growth
orf19.4461	orf19.4461	0.00151799	0.65612	-0.00112352	0.766471	0.000902522	0.895598	-0.00192069	0.418799	Predicted ORF in Assemblies 19, 20 and 21
orf19.4464	SEN15	-0.00498022	0.239786	-0.00117916	0.901233	0.00292412	0.40533	0.00744447	0.183908	Similar to delta subunit of tRNA splicing endonuclease; increased transcription is observed upon fluphenazine treatment
orf19.4466	orf19.4466	0.000135731	0.98162	0.00291952	0.754624	0.0066181	0.0684425	-0.00075713	0.925887	Predicted ORF in Assemblies 19, 20 and 21
orf19.4467	orf19.4467	0.00702111	0.164353	-0.0107667	0.0541861	0.00549942	0.194935	0.00427098	0.64274	Predicted ORF in Assemblies 19, 20 and 21; possibly spurious ORF (Annotation Working Group prediction)
orf19.4468	orf19.4468	-0.00450775	0.550854	-0.00594809	0.575599	-0.00255739	0.762371	0.00179589	0.816369	Predicted ORF in Assemblies 19, 20 and 21
orf19.4471	orf19.4471	-0.00179867	0.740458	0.00383257	0.323574	0.0115246	0.08561	0.00828085	0.191343	Predicted ORF in Assemblies 19, 20 and 21
orf19.4472	orf19.4472	0.00238724	0.710578	0.00140756	0.720057	0.00208129	0.444181	-0.0026324	0.306585	Predicted ORF in Assemblies 19, 20 and 21
orf19.4477	CSH1	-0.00961864	0.100785	-0.000870141	0.719179	0.000440306	0.895598	8.76903e-05	0.974183	Member of aldo-keto reductase family, similar to aryl alcohol dehydrogenases; role in adhesion to fibronectin, cell surface hydrophobicity; regulated by temperature, growth phase, benomyl, macrophage interaction; azole resistance associated
orf19.4478	orf19.4478	0.00110492	0.902573	0.00719697	0.616621	0.00138817	0.553916	0.00719681	0.237137	Predicted ORF in Assemblies 19, 20 and 21
orf19.4479	orf19.4479	0.00253201	0.759218	0.00358816	0.344647	-0.00374215	0.178257	0.00561435	0.396577	Predicted ORF in Assemblies 19, 20 and 21; downregulated during core stress response
orf19.448	orf19.448	-0.00152747	0.845125	0.00961689	0.229786	-0.0025786	0.519816	0.00655173	0.094166	Predicted ORF in Assemblies 19, 20 and 21
orf19.4482	IFI3	0.00335033	0.356287	0.00170453	0.727897	0.00454788	0.393662	0.000458622	0.891503	Predicted ORF in Assemblies 19, 20 and 21; constitutive expression independent of MTL or white-opaque status
orf19.4488	orf19.4488	0.002094	0.822844	-0.0067595	0.517281	-0.0131653	0.207064	-0.0321386	0.044474	Predicted ORF in Assemblies 19, 20 and 21
orf19.449	orf19.449	0.00177462	0.55092	0.0016439	0.380458	-0.000150549	0.964819	0.00276573	0.647778	Predicted ORF in Assemblies 19, 20 and 21; possible phosphatidyl synthase; transcription reduced upon yeast-hyphal switch; protein detected by mass spec in stationary phase cultures
orf19.4490.2	QCR8	-0.00365224	0.790135	-0.0247997	0.495937	0.022651	0.0566608	-0.0169067	0.33607	ORF Predicted by Annotation Working Group; shows colony morphology-related gene regulation by Ssn6p; macrophage/pseudohyphal-induced
orf19.4491	ERG20	0.00680342	0.140617	-0.00353231	0.669652	0.00727235	0.205152	0.0103245	0.0258257	Putative farnesyl pyrophosphate synthetase involved in isoprenoid and sterol biosynthesis, based on similarity to S. cerevisiae Erg20p; likely to be essential for growth, based on an insertional mutagenesis strategy
orf19.4492	orf19.4492	-0.0104096	0.381416	-0.0312134	0.637811	-0.010789	0.267542	-0.00927235	0.450909	Predicted ORF in Assemblies 19, 20 and 21
orf19.4495	NDH51	-0.00276662	0.655369	-0.0157559	0.636255	0.00568563	0.762371	-0.0234038	0.12331	Subunit of nicotinamide adenine dinucleotide dehydrogenase complex I, of the mitochondrial electron transport chain; required for wild-type filamentous growth; alkaline downregulated
orf19.450	orf19.450	0.00941894	0.0277151	0.00725452	0.642797	-0.00464396	0.456477	0.00574406	0.356483	Predicted ORF in Assemblies 19, 20 and 21
orf19.4502	orf19.4502	0.00570538	0.569412	0.00482118	0.49504	0.00554559	0.284607	-0.0136678	0.416193	Predicted ORF in Assemblies 19, 20 and 21
orf19.4503	orf19.4503	0.0117362	0.0593045	0.00797968	0.583537	0.00156651	0.871593	0.00869268	0.473584	Predicted ORF in Assemblies 19, 20 and 21
orf19.4504	orf19.4504	0.00613	0.55223	-0.00193357	0.848028	0.0132273	0.115237	0.0040749	0.424281	Predicted ORF in Assemblies 19, 20 and 21
orf19.4505	ADH3	0.000103056	0.985113	0.0124385	0.190477	0.00217831	0.799257	-0.00401111	0.731655	Expression is regulated upon white-opaque switching; induced by nitric oxide in yhb1 mutant
orf19.4506	LYS22	-0.0102717	0.38018	-0.0108233	0.309715	-0.00636291	0.327484	-0.0228466	0.583088	Putative homocitrate synthase; fungal-specific (no human or murine homolog); repressed by nitric oxide; protein level decreased in stationary phase cultures
orf19.4507	orf19.4507	0.0123476	0.0601879	0.00770552	0.321887	0.00494896	0.590324	0.00647416	0.462535	Predicted ORF in Assemblies 19, 20 and 21
orf19.4509	orf19.4509	-0.000432365	0.954128	0.00980643	0.0736404	0.00588914	0.356454	0.0107529	0.189618	Predicted ORF in Assemblies 19, 20 and 21
orf19.451	SOK1	-0.0448464	0.0789229	-0.0577669	0.285414	0.0114975	0.69717	-0.037763	0.175444	Transcription is induced in response to alpha pheromone in SpiderM medium
orf19.4510	IFA4	0.0134887	0.0697422	0.00856586	0.142995	0.00288171	0.625822	0.010689	0.0230329	Predicted ORF in Assemblies 19, 20 and 21; oxidative stress-induced via Cap1p
orf19.4511	orf19.4511	-0.00382974	0.610509	0.00853691	0.159851	0.00503049	0.161932	-0.00320221	0.554374	Predicted ORF in Assemblies 19, 20 and 21
orf19.4516	orf19.4516	0.00770304	0.240319	0.000350872	0.964908	0.00927926	0.20508	0.0086545	0.320588	Predicted ORF in Assemblies 19, 20 and 21
orf19.4517	orf19.4517	-0.0593689	0.0223122	-0.0925801	0.011238	-0.107175	0.00412949	-0.0781875	0.0842617	Predicted ORF in Assemblies 19, 20 and 21
orf19.4518	orf19.4518	0.00405429	0.653166	-0.00954827	0.428239	-0.0019425	0.818571	-0.0342417	0.0780092	Protein not essential for viability
orf19.4519	SUV3	0.00735322	0.0663754	0.00200233	0.827877	-0.000627044	0.923632	0.00518632	0.415707	Protein required for chlamydospore formation, for embedded hyphal growth, and for wild-type respiratory growth; similar to S. cerevisiae Suv3p, which is an RNA helicase involved in mitochondrial RNA catabolism
orf19.4521	orf19.4521	0.00346883	0.495454	-0.0034276	0.610382	0.007163	0.344238	0.0018573	0.731655	Predicted ORF in Assemblies 19, 20 and 21; hyphal-induced expression
orf19.4524	ZCF24	0.00137725	0.722296	0.000777641	0.630456	-0.000847344	0.761375	-0.00319597	0.291383	Predicted zinc-finger protein of unknown function; caspofungin induced
orf19.4527	HGT1	-0.00580917	0.792511	0.0174756	0.075797	-0.0174626	0.553916	0.00129505	0.931849	High-affinity glucose transporter, member of major facilitator superfamily; transcription induced by progesterone and by drugs including chloramphenicol and benomyl; likely essential for growth, based on an insertional mutagenesis strategy
orf19.4530.1	orf19.4530.1	0.006248	0.166836	-0.00230966	0.84441	0.0042111	0.245246	0.00586883	0.298572	ORF Predicted by Annotation Working Group; regulated by Nrg1p, Tup1p
orf19.4531	orf19.4531	0.00354077	0.210998	0.00173033	0.524455	-0.00645243	0.363992	-0.000505442	0.952001	Putative PDR-subfamily ABC transporter
orf19.4532	orf19.4532	0.00657402	0.132434	0.0026075	0.483807	0.00729788	0.165618	0.00167323	0.506225	Predicted ORF in Assemblies 19, 20 and 21; protein detected by mass spec in exponential and stationary phase cultures
orf19.4533	orf19.4533	-0.0112206	0.0960902	-0.00352874	0.673247	0.00301808	0.697288	0.00409636	0.758639	Predicted ORF in Assemblies 19, 20 and 21
orf19.4534	orf19.4534	0.00968889	0.089472	0.000337015	0.97848	0.00549769	0.430116	0.00376963	0.460317	Predicted ORF in Assemblies 19, 20 and 21; macrophage-downregulated gene
orf19.4535	PTR3	-0.00858861	0.358257	-0.00533726	0.807253	-0.00707945	0.461737	0.000622933	0.951059	Protein not essential for viability; similar to S. cerevisiae Ptr3p, which is a sensor of external amino acids; increased expression observed in an ssr1 homozygous null mutant
orf19.4536	CYS4	0.00685935	0.273357	0.00959881	0.301548	0.00211984	0.82807	-0.00550969	0.630142	Predicted enzyme of sulfur amino acid biosynthesis; antigenic in mouse; upregulated in biofilm; alkaline upregulated; macrophage/pseudohyphal-induced
orf19.4537	orf19.4537	0.00654379	0.698498	0.015323	0.320301	0.0102839	0.389052	0.00890051	0.625815	Predicted ORF in Assemblies 19, 20 and 21
orf19.454	SFL1	-0.0569755	0.0507242	-0.0653974	0.0625074	0.00781223	0.161932	-0.0238963	0.130045	Protein involved in negative regulation of flocculation and filamentous growth; induced in core caspofungin response
orf19.4540	UBC8	0.00383601	0.643459	-0.00344973	0.632416	0.00322163	0.743801	-0.00189072	0.891925	Protein similar to S. cerevisiae Ubc8p; transcription is induced in response to alpha pheromone in SpiderM medium
orf19.4542	orf19.4542	0.00371368	0.651622	-0.000134155	0.993571	0.004564	0.397531	0.00475364	0.426033	Predicted ORF in Assemblies 19, 20 and 21
orf19.4543	UGA2	-0.00260592	0.801492	-0.00421194	0.782561	-0.00783641	0.227319	0.00500646	0.477122	Protein not essential for viability; similar to S. cerevisiae Uga2p, which is succinate semialdehyde dehydrogenase with a role in glutamate catabolism; transcription regulated by Mig1p, Tup1p, Gcn4p
orf19.4544	orf19.4544	-0.00299714	0.615219	-0.00241426	0.870625	-0.0026695	0.549657	-0.00545286	0.359752	Predicted ORF in Assemblies 19, 20 and 21; possibly spurious ORF (Annotation Working Group prediction)
orf19.4545	SWI4	0.00113887	0.873461	0.0126363	0.0575166	0.00214212	0.569893	0.00189215	0.604104	Predicted ORF in Assemblies 19, 20 and 21; periodic mRNA expression, peak at cell-cycle G1/S phase; predicted, conserved MBF binding sites upstream of G1/S-regulated genes
orf19.4546	HOL4	0.00460677	0.738512	0.0127501	0.33522	-0.00496387	0.490217	-0.0307251	0.313544	Protein described as an ion transporter; alkaline upregulated by Rim101p; Plc1p-regulated; caspofungin repressed
orf19.4549	FGR38	0.0102612	0.1253	0.00685278	0.273215	0.00763013	0.121901	0.0074653	0.126736	Protein lacking an ortholog in S. cerevisiae; member of a family of related proteins; transposon mutation affects filamentous growth; macrophage-induced gene
orf19.4550	orf19.4550	0.00451247	0.240319	0.00595632	0.318499	0.00653903	0.0831067	0.00465106	0.445772	Predicted membrane transporter, member of the drug:proton antiporter (12 spanner) (DHA1) family, major facilitator superfamily (MFS)
orf19.4551	CTN1	0.00571937	0.505354	-0.00517064	0.685608	-0.000211054	0.980147	-0.00357607	0.76612	Predicted carnitine acetyl transferase; required for growth on nonfermentable carbon sources but not for hyphal growth or virulence in mouse systemic model; transcription induced in macrophage; macrophage/pseudohyphal-repressed after 16 hr
orf19.4553	orf19.4553	-0.152955	0.123461	-0.154061	0.159851	-0.167901	0.0837655	-0.136151	0.177652	Predicted ORF in Assemblies 19, 20 and 21
orf19.4555	ALS4	0.00281123	0.599543	0.00759165	0.0869696	0.0068001	0.169757	0.00851339	0.295091	ALS family protein; role in adhesion and wild-type germ tube induction; growth and temperature regulated; expressed during infection of human buccal epithelial cells; down-regulated upon vaginal contact; putative GPI-anchored
orf19.4557	orf19.4557	0.00535257	0.137412	-0.000306084	0.962111	0.00313559	0.553916	0.00515527	0.223226	Predicted ORF in Assemblies 19, 20 and 21
orf19.4563	orf19.4563	0.000285372	0.956228	0.00375535	0.0769597	0.00340073	0.166186	0.000797511	0.756932	Predicted ORF in Assemblies 19, 20 and 21; decreased expression in response to prostaglandins
orf19.4568	ZCF25	-0.0013719	0.761229	0.000257475	0.955025	-0.000625515	0.86433	-0.00108316	0.849431	Putative transcription factor with zinc cluster DNA-binding motif
orf19.4573	ZCF26	0.00527218	0.266265	-0.00924779	0.565786	0.00175314	0.806898	0.000808279	0.93155	Putative transcription factor with zinc cluster DNA-binding motif; transcription is induced in response to alpha pheromone in SpiderM medium
orf19.4574	orf19.4574	2.92369e-05	0.996081	0.000642592	0.939275	0.00125144	0.861602	0.00107346	0.917672	Predicted ORF in Assemblies 19, 20 and 21
orf19.4575	orf19.4575	0.00324121	0.420994	0.00173649	0.795085	0.00677496	0.0732236	-0.00136778	0.814908	Predicted ORF in Assemblies 19, 20 and 21
orf19.4577	orf19.4577	0.00696096	0.256042	-0.00268235	0.781274	0.00281969	0.75098	0.00433714	0.289043	Predicted ORF in Assemblies 19, 20 and 21
orf19.4578	CYT2	0.0128561	0.0265761	0.00380881	0.536222	0.00220646	0.673415	0.00859651	0.0842617	Protein described as cytochrome c1 heme lyase; transcription is regulated by Nrg1p; transcriptionally regulated by iron; expression greater in high iron
orf19.458	orf19.458	0.00266672	0.156687	0.000437258	0.933639	0.00310256	0.168378	0.00195512	0.420594	Predicted ORF in Assemblies 19, 20 and 21
orf19.4583	orf19.4583	0.00287015	0.266578	0.00341628	0.248199	0.000120497	0.967183	0.00135408	0.618612	Predicted ORF in Assemblies 19, 20 and 21
orf19.4584	PHO114	-0.00496637	0.231563	0.0097483	0.27336	-0.00308142	0.38183	-0.00167037	0.859846	Acid phosphatase, transcriptionally activated by Mnl1p under weak acid stress
orf19.4591	CAT2	0.0100832	0.152175	0.00613139	0.321845	-0.000900999	0.901398	-0.0184673	0.12331	Major carnitine acetyl transferase localized in peroxisomes and mitochondria; involved in intracellular acetyl-CoA transport; transcriptionally induced in macrophage; farnesol-upregulated in biofilm; Hog1p-downregulated
orf19.4592	HSX11	-0.00561762	0.280658	0.00628622	0.525481	-0.00263531	0.484022	0.00129872	0.811515	UDP-glucose:ceramide glucosyltransferase (glucosylceramide synthase [GCS], EC 2.4.1.80); enzyme of sphingolipid metabolism
orf19.4593	RGA2	0.00992341	0.330426	0.00809186	0.175925	0.00863952	0.197568	0.00325948	0.735241	Putative GTPase-activating protein (GAP) for Rho-type GTPase Cdc42p; involved in cell signaling pathways that control cell polarity; similar to S. cerevisiae Rga2p; induced upon low-level peroxide stress
orf19.4595	orf19.4595	-0.00248584	0.279607	-0.000877678	0.794326	0.000913262	0.804878	-0.00106187	0.661942	Predicted ORF in Assemblies 19, 20 and 21; possibly spurious ORF (Annotation Working Group prediction)
orf19.4596	orf19.4596	0.00626549	0.477185	0.00476069	0.686664	0.00267118	0.848743	-0.00496247	0.693464	Predicted ORF in Assemblies 19, 20 and 21
orf19.4597	orf19.4597	0.000593485	0.946102	0.00341969	0.651852	0.00119784	0.744422	0.00612064	0.323589	Predicted ORF in Assemblies 19, 20 and 21
orf19.4599	PHO89	0.00206305	0.741008	0.00340918	0.700129	0.0044127	0.304379	0.00637211	0.190423	Putative phosphate permease; expression is regulated upon white-opaque switching; alkaline upregulated by Rim101p; induced upon biofilm formation; possibly adherence-induced
orf19.4600.1	orf19.4600.1	0.000863873	0.921439	-0.000849219	0.952607	0.00116739	0.876812	0.00758375	0.425018	ORF Predicted by Annotation Working Group
orf19.4602	MDH1-1	-0.00632502	0.550542	-0.00777114	0.81296	-0.00298576	0.743321	-0.0180052	0.593076	Predicted malate dehydrogenase; macrophage-induced protein
orf19.4605	TYR1	-0.00765231	0.14912	-0.00903349	0.761753	0.00209167	0.793929	0.0150561	0.0156124	Putative prepephenate dehydrogenase; enzyme of tyrosine biosynthesis; fungal-specific (no human or murine homolog)
orf19.4607	orf19.4607	-0.00517347	0.383394	-0.0069018	0.564683	0.00426735	0.174703	0.00447565	0.246532	Predicted ORF in Assemblies 19, 20 and 21; hyphal induced
orf19.4610	orf19.4610	-0.0062452	0.259784	-0.00132168	0.799686	-0.000490554	0.9396	-0.00239474	0.652387	Predicted ORF in Assemblies 19, 20 and 21
orf19.4611	orf19.4611	0.00356539	0.249263	0.0143882	0.020265	0.00392365	0.589742	0.00564007	0.168387	Predicted ORF in Assemblies 19, 20 and 21
orf19.4612	orf19.4612	-0.00788145	0.310552	-0.02664	0.187297	-0.00268294	0.680179	-0.00428588	0.652591	Predicted ORF in Assemblies 19, 20 and 21
orf19.4615	orf19.4615	0.00651768	0.423444	0.000605847	0.960344	0.00186264	0.819384	0.0035209	0.807181	Predicted ORF in Assemblies 19, 20 and 21
orf19.4618	FBA1	0.00519875	0.242155	0.000142117	0.989212	0.00793053	0.0566608	0.00995538	0.237403	Putative fructose-bisphosphate aldolase; enzyme of glycolysis; antigenic in murine or human infection; regulated on yeast-hyphal switch; induced by Efg1p, Gcn4p, Hog1p, biofilm growth, or fluconazole; phagocytosis-repressed; fungal-specific
orf19.4623.3	NHP6A	0.0145456	0.0265872	0.00161088	0.816317	0.005322	0.144198	0.00533587	0.343686	Protein described as nonhistone chromatin component; RNA abundance regulated by tyrosol and cell density; amphotericin B, caspofungin repressed; intron in 5'-UTR
orf19.4624	HRT2	-0.00101506	0.852999	0.0123111	0.0875176	-0.00102305	0.788141	0.00236104	0.75394	Protein described as having a role in Ty3 transposition; decreased expression in hyphae compared to yeast-form cells; protein detected by mass spec in stationary phase cultures
orf19.4629	orf19.4629	-0.00702811	0.651787	0.0125764	0.676037	-0.0019922	0.861846	-0.00113448	0.968331	Predicted ORF in Assemblies 19, 20 and 21
orf19.4632	RPL20B	0.00163001	0.77189	0.0131502	0.0544364	-0.000370471	0.91702	0.00630066	0.319252	Predicted ribosomal protein; genes encoding cytoplasmic ribosomal subunits, translation factors, and tRNA synthetases are downregulated upon phagocytosis by murine macrophage; intron in 5'-UTR
orf19.4637	orf19.4637	0.0120697	0.122998	0.00831904	0.40669	0.00743581	0.368356	0.00906687	0.276102	Predicted ORF in Assemblies 19, 20 and 21
orf19.4639	orf19.4639	0.00201474	0.752595	-0.00319396	0.881609	-0.00625714	0.579985	-0.00669172	0.685199	Predicted ORF in Assemblies 19, 20 and 21; protein detected by mass spec in exponential and stationary phase cultures
orf19.4640	PWP1	-0.00580878	0.245408	-0.00226929	0.635048	-0.00489403	0.255546	-0.00282672	0.358003	Predicted ORF in Assemblies 19, 20 and 21; downregulated in core stress response
orf19.4641	NMT1	0.0139086	0.0309685	0.00535032	0.668983	0.00105597	0.81601	0.0032094	0.523938	Myristoyl-CoA:protein N-myristoyltransferase; attaches the fatty acid myristate to a small number of proteins at an N-terminal Gly; essential; antifungal drug target; functional homolog of S. cerevisiae Nmt1p
orf19.4642	orf19.4642	-0.0946332	0.0309685	-0.0566794	0.344437	-0.156947	0.104458	-0.179787	0.0755563	Predicted ORF in Assemblies 19, 20 and 21
orf19.4647	HAP3	-0.000917456	0.811428	-0.00321608	0.75166	0.001905	0.703843	0.0010276	0.893186	Protein described as similar to CCAAT-binding transcription factor that regulates respiration; expression greater in low iron; transcription is opaque specific, alkaline upregulated, ciclopirox olamine induced
orf19.4650	ILV6	0.00168256	0.824176	0.00976704	0.167525	0.00933944	0.100828	-0.0031686	0.668232	Putative regulatory subunit of acetolacetate synthase ; fungal-specific (no human or murine homolog); alkaline upregulated; regulated by Gcn2p and Gcn4p
orf19.4651	PGA53	0.00208946	0.581474	0.00155957	0.926824	2.23495e-05	0.996236	0.0010608	0.893311	Putative GPI-anchored protein of unknown function; greater mRNA abundance observed in a cyr1 homozygous null mutant than in wild type
orf19.4652	orf19.4652	0.00564272	0.0734847	0.00355765	0.548754	0.00762048	0.191223	0.00922856	0.160821	Predicted ORF in Assemblies 19, 20 and 21
orf19.4653	orf19.4653	-0.00098365	0.897129	0.000939891	0.923148	0.00152372	0.925892	0.0142543	0.0877069	Transcriptionally regulated by iron; expression greater in low iron; similar to GPI-linked cell-wall proteins
orf19.4654	orf19.4654	-0.0052126	0.603698	-0.0155684	0.154924	-0.00867997	0.2507	-0.00294209	0.84319	Predicted ORF in Assemblies 19, 20 and 21
orf19.4656	orf19.4656	0.0077029	0.145933	-0.00200665	0.667823	0.000915871	0.758249	0.00311838	0.538741	Predicted ORF in Assemblies 19, 20 and 21
orf19.4657	orf19.4657	-0.324193	0.0113001	-0.209337	0.210185	-0.325389	0.00425403	-0.135059	0.0133078	Predicted ORF in Assemblies 19, 20 and 21
orf19.4659	orf19.4659	-0.00698623	0.471854	-0.0159057	0.311232	0.00124228	0.88516	-0.0261584	0.221316	Predicted ORF in Assemblies 19, 20 and 21
orf19.4660	RPS6A	0.00611271	0.175562	-0.00555136	0.466703	-0.00264159	0.817221	0.00142188	0.877536	Predicted ribosomal protein; similar to ribosomal protein S10; localizes to cell surface of yeast-form cells, but not hyphal cells; genes encoding cytoplasmic ribosomal subunits are downregulated upon phagocytosis by murine macrophage
orf19.4664	NAT4	-0.00896018	0.0243846	-0.00460316	0.476205	0.00224058	0.720452	-0.00229472	0.661942	Putative histone acetyltransferase, involved in regulation of white-opaque switching; predicted ORF in Assemblies 19, 20 and 21
orf19.4665	orf19.4665	0.00997809	0.0803387	-0.00100087	0.81946	0.00101719	0.91133	0.00101889	0.901305	Predicted ORF in Assemblies 19, 20 and 21
orf19.4666	orf19.4666	-0.0026816	0.573716	0.000155841	0.981681	-0.00300681	0.652062	0.00221806	0.869821	Predicted ORF in Assemblies 19, 20 and 21; hyphal-induced expression, regulated by Cyr1p, Ras1p, Efg1p; possibly spurious ORF (Annotation Working Group prediction)
orf19.4673	BMT9	0.0163692	0.100785	0.0111589	0.415764	0.0121165	0.169464	0.00747991	0.408068	Putative beta-mannosyltransferase, member of a 9-gene family that includes characterized genes BMT1, BMT2, BMT3, and BMT4 with roles in beta-1,2-mannosylation of cell wall phosphopeptidomannan; predicted ORF in Assemblies 19, 20 and 21
orf19.4675	orf19.4675	0.000760364	0.902573	0.000881454	0.813855	0.00506861	0.358391	0.00119144	0.698766	Predicted ORF in Assemblies 19, 20 and 21
orf19.4680	orf19.4680	0.00301194	0.660569	0.00377889	0.482711	0.00759617	0.144198	0.00654623	0.298572	Predicted ORF in Assemblies 19, 20 and 21; mutation confers hypersensitivity to toxic ergosterol analog
orf19.4682	HGT17	0.0113258	0.0344331	-0.00310731	0.798665	-0.00713009	0.229487	-0.00581355	0.652387	Putative glucose transporter of the major facilitator superfamily; the C. albicans glucose transporter family comprises 20 members; 12 probable membrane-spanning segments; induced at low (0.2%, compared to 2%) glucose in rich media
orf19.4683	MLP1	-0.0264789	0.166116	-0.0222964	0.27103	-0.0133221	0.50882	-0.0171316	0.369558	Protein similar to S. cerevisiae Mlp1p, which is a myosin-like protein
orf19.4685	orf19.4685	0.00120101	0.81514	0.00267812	0.772065	-0.00168552	0.728109	0.000656742	0.917672	Predicted ORF in Assemblies 19, 20 and 21
orf19.4686	orf19.4686	-0.0146708	0.228861	-0.0145691	0.236343	-0.00966778	0.26789	-0.00322574	0.693464	Predicted ORF in Assemblies 19, 20 and 21
orf19.4688	DAG7	0.00905458	0.186121	0.0191861	0.25942	-0.00502484	0.323231	-0.00143439	0.876035	Predicted ORF in Assemblies 19, 20 and 21; mutation confers hypersensitivity to toxic ergosterol analog; a-specific transcription; alpha-factor induced
orf19.4690	orf19.4690	-0.00436607	0.730802	0.0110024	0.50179	0.0075148	0.308422	0.00370532	0.712612	Predicted ORF in Assemblies 19, 20 and 21; induced by nitric oxide in yhb1 mutant
orf19.4691	orf19.4691	0.00663333	0.0606657	0.00506515	0.60164	0.00337429	0.0943398	0.00651099	0.249974	Predicted ORF in Assemblies 19, 20 and 21
orf19.4697	MDN1	-0.0146551	0.224801	-0.00841102	0.656809	-0.0140356	0.269933	-0.00708005	0.751646	Protein induced during the mating process
orf19.4699	orf19.4699	-0.00537805	0.837468	0.0127999	0.549198	0.0100572	0.1833	0.00478694	0.639332	Putative phospholipase of patatin family; similar to S. cerevisiae Ymr313p; predicted Kex2p substrate
orf19.4701	orf19.4701	0.0043348	0.42616	0.00565808	0.482344	0.0107421	0.0724746	0.00675461	0.0784367	Predicted ORF in Assemblies 19, 20 and 21
orf19.4703	orf19.4703	0.0101621	0.0723853	-0.0010927	0.952607	0.00389916	0.62747	0.00262901	0.827113	Predicted ORF in Assemblies 19, 20 and 21; has similarity to mutator-like element (MULE) transposase
orf19.4704	ARO1	-0.0750063	0.00738614	-0.0281449	0.57855	-0.0158455	0.554028	-0.0862984	0.170431	Putative pentafunctional arom enzyme; fungal-specific (no human or murine homolog); Gcn2p-, Gcn4p-regulated
orf19.4705	orf19.4705	-0.00540435	0.289623	0.0124654	0.137132	-0.000266786	0.975163	-0.00224369	0.755877	Predicted ORF in Assemblies 19, 20 and 21
orf19.4706	orf19.4706	0.00945835	0.0771228	0.00265645	0.744186	0.00940316	0.13179	0.0130678	0.125628	Predicted ORF in Assemblies 19, 20 and 21; greater mRNA abundance observed in a cyr1 or ras1 homozygous null mutant than in wild type; fluconazole-induced; transcription is induced in response to alpha pheromone in SpiderM medium
orf19.4707	orf19.4707	0.0054413	0.082139	-0.00245789	0.737591	0.00337565	0.312436	0.00437888	0.407046	Putative secreted acid sphingomyelin phosphodiesterase; possible Kex2p substrate
orf19.4712	FGR6-3	0.00367606	0.209884	0.00967464	0.060515	0.00110569	0.709064	-0.00190911	0.636658	Protein lacking an ortholog in S. cerevisiae; member of a family encoded by FGR6-related genes in the RB2 repeat sequence; transposon mutation affects filamentous growth
orf19.4715	orf19.4715	0.00598546	0.354916	0.00322923	0.549198	0.00512193	0.122221	0.0113259	0.0428155	Predicted ORF in Assemblies 19, 20 and 21
orf19.4718	TRP5	0.00895236	0.122998	0.0134779	0.175925	0.0110008	0.0888735	0.00780442	0.351887	Predicted tryptophan synthase; Gcn4p-regulated; upregulated in biofilm; identified in detergent-resistant membrane fraction (possible lipid raft component); predicted N-terminal acetylation; S. cerevisiae ortholog is Gcn4p regulated
[truncated: 1,655 more rows]
