# Supplementary material for: Gene Annotation and Drug Target Discovery in Candida albicans with a Tagged Transposon Mutant Collection
Source: PLoS Pathog. 2010 Oct 7;6(10):e1001140. doi: 10.1371/journal.ppat.1001140 (PMC2951378; doi:10.1371/journal.ppat.1001140)
Supplement: Table S5 — Genes haploinsufficient in 3 or more conditions (0.04 MB XLS) [file ppat.1001140.s014.xls]

## Sheet: S5
Table S5. Genes haploinsufficient in 3 or more conditions
C.albicans ORF	C. albicans gene	S. cerevisiae ortholog	Verfied?	C. albicans description
orf19.1105.3			Uncharacterized	ORF Predicted by Annotation Working Group
orf19.1180		YER152C	Uncharacterized	Predicted ORF in Assemblies 19, 20 and 21
orf19.1317	OSH3	OSH3	Verified	Protein required for wild-type filamentation; has oxysterol binding protein domain and pleckstrin homology motif; overproducton suppresses cph1 homozygous null filamnetation defect; similar to S. cerevisiae Osh3p
orf19.1470	RPS26A	RPS26A	Uncharacterized	Predicted ribosomal protein; regulated by Nrg1p, Tup1p; genes encoding cytoplasmic ribosomal subunits, translation factors, and tRNA synthetases are downregulated upon phagocytosis by murine macrophage; intron in 5'-UTR
orf19.1690	TOS1	TOS1	Verified	Protein described as similar to alpha agglutinin anchor subunit; exogenously expressed protein is a substrate for Kex2p processing in vitro; fluconazole-induced; transcription is induced in response to alpha pheromone in SpiderM medium
orf19.1715	IRO1		Verified	Putative transcription factor; role in iron utilization, pathogenesis; both IRO1 and adjacent URA3 are mutated in strain CAI4; suppresses S. cerevisiae aft1 mutant low-iron growth defect; hyphal-induced; reports differ about iron regulation
orf19.1723		YJL055W	Uncharacterized	Predicted ORF in Assemblies 19, 20 and 21
orf19.1738	UGP1	UGP1	Verified	Protein similar to UTP-glucose-1-phosphaturidyl transferase; localizes to cell surface of yeast-form cells, but not hyphal cells; Hog1p-downregulated; protein detected by mass spec in stationary phase cultures
orf19.1802		TPA1	Uncharacterized	Predicted ORF in Assemblies 19, 20 and 21; decreased expression in response to prostaglandins
orf19.1938			Uncharacterized	Decreased transcription is observed in an azole-resistant strain that overexpresses CDR1 and CDR2; increased transcription is observed upon benomyl treatment
orf19.1954	PUS4	PUS4	Uncharacterized	Transcription is regulated by Nrg1p, Mig1p, and Tup1p
orf19.2077			Verified	Putative transcription factor with zinc cluster DNA-binding motif; hypersensitive to toxic ergosterol analog ECC69 and/or ECC1384
orf19.2078		APM2	Uncharacterized	Predicted ORF in Assemblies 19, 20 and 21
orf19.2179.2	RPS10	RPS10A	Uncharacterized	Predicted ribosomal protein; downregulated in the presence of human whole blood or polymorphonuclear (PMN) cells
orf19.230			Uncharacterized	Predicted ORF in Assemblies 19, 20 and 21
orf19.2365	POL2	POL2	Uncharacterized	Protein described as DNA polymerase epsilon; transcriptionally induced by interaction with macrophage; transcription is regulated by Tup1p; periodic mRNA expression, peak at cell-cycle G1/S phase
orf19.2418			Uncharacterized	Predicted ORF in Assemblies 19, 20 and 21
orf19.2476		ECM5	Uncharacterized	Predicted ORF in Assemblies 19, 20 and 21
orf19.2533.1		SBH2	Uncharacterized	ORF Predicted by Annotation Working Group
orf19.2713		MSH5	Uncharacterized	Predicted ORF in Assemblies 19, 20 and 21
orf19.272	FAA21	FAA2	Uncharacterized	Predicted acyl CoA synthetase; upregulated upon phagocytosis; transcription is regulated by Nrg1p and Mig1p
orf19.2935	RPL10	RPL10	Uncharacterized	Putative ribosomal protein; genes encoding cytoplasmic ribosomal subunits, translation factors, and tRNA synthetases downregulated upon phagocytosis by murine macrophage; transcription regulated upon yeast-hyphal switch; intron in 5'-UTR
orf19.2967	TIF34	TIF34	Verified	Putative translation initiation factor; mutation confers hypersensitivity to roridin A and verrucarin A; genes encoding ribosomal subunits, translation factors, and tRNA synthetases are downregulated upon phagocytosis by murine macrophage
orf19.3001	TEM1	TEM1	Uncharacterized	Protein similar to S. cerevisiae Tem1p, which is a GTPase involved in termination of the M phase of the cell cycle; induced under Cdc5p depletion
orf19.3002	RPS1	RPS1B	Uncharacterized	Probable ortholog of S. cerevisiae ribosomal protein Rp10 (Rps1Ap and Rps1Bp), elicits a host antibody response during infection; transcription is induced during active growth
orf19.3293		TSC13	Uncharacterized	Predicted ORF in Assemblies 19, 20 and 21; possibly an essential gene, disruptants not obtained by UAU1 method
orf19.3298	CCH1	CCH1	Verified	Putative voltage-gated Ca2+ channel of the high affinity calcium uptake system; roles in thigmotropism, establishment of galvanotropism; transcription is regulated by Nrg1p and Mig1p
orf19.3325.3	RPS21B	RPS21B	Uncharacterized	Protein described as similar to ribosomal protein S21; regulated by Nrg1p, Tup1p; shows colony morphology-related gene regulation by Ssn6p; transcription is positively regulated by Tbf1p
orf19.3355	ISN1	ISN1	Uncharacterized	Putative inosine 5'-monophosphate 5'-nucleotidase; fungal-specific (no human or murine homolog)
orf19.3364			Uncharacterized	Predicted ORF in Assemblies 19, 20 and 21; possibly spurious ORF (Annotation Working Group prediction)
orf19.3415.1	RPL32	RPL32	Uncharacterized	Predicted ribosomal protein
orf19.3437			Uncharacterized	Predicted ORF in Assemblies 19, 20 and 21
orf19.3568	RXT3		Uncharacterized	Predicted ORF in Assemblies 19, 20 and 21
orf19.3775	SSK2	SSK2	Verified	Protein described as similar to MAP kinase kinase kinases; transcription is downregulated in response to treatment with ciclopirox olamine
orf19.3942.1	RPL43A	RPL43A|RPL43B	Uncharacterized	Downregulated in the presence of human whole blood or polymorphonuclear (PMN) cells; shows colony morphology-related gene regulation by Ssn6p
orf19.4290	TRR1	TRR1	Verified	Putative thioredoxin reductase; upregulated in presence of human neutrophils; regulated by Tsa1p, Tsa1Bp; induced by nitric oxide; peroxide-induced; oxidative stress-induced via Cap1p; fungal-specific (no human/murine homolog)
orf19.434	PRD1	PRD1	Uncharacterized	Transcription is regulated by Nrg1p, Mig1p, and Tup1p; Hog1p-induced
orf19.4363	SGD1	SGD1	Uncharacterized	Predicted ORF in Assemblies 19, 20 and 21; downregulated during core stress response; transcription is increased in populations of cells exposed to fluconazole over multiple generations
orf19.4375.1	RPS30	RPS30B|RPS30A	Uncharacterized	ORF Predicted by Annotation Working Group; putative 40S ribosomal protein S30; shows colony morphology-related gene regulation by Ssn6p
orf19.4517			Uncharacterized	Predicted ORF in Assemblies 19, 20 and 21
orf19.4657		NEM1	Uncharacterized	Predicted ORF in Assemblies 19, 20 and 21
orf19.4791			Uncharacterized	Predicted ORF in Assemblies 19, 20 and 21
orf19.4808	NUP188	NUP188	Uncharacterized	Transcription is regulated by Nrg1p and Mig1p
orf19.5015	MYO2	MYO2	Verified	Class V myosin; nonessential; required for wild-type actin cytoskeletal polarity, nuclear organization and migration, and hyphal growth; sole class V myosin in C. albicans; conserved myosin ATPase and tail domains
orf19.5038		TRM3	Uncharacterized	Predicted ORF in Assemblies 19, 20 and 21
orf19.5280	MUP1	MUP1	Uncharacterized	Alkaline upregulated by Rim101p
orf19.5553		YKL069W	Uncharacterized	Predicted ORF in Assemblies 19, 20 and 21
orf19.5558	RBF1		Verified	Transcription factor; glutamine-rich activation domain; binds RPG-box DNA sequences; predominantly nuclear; antigenic during human oral infection; mutation causes accelerated induction of filamentous growth
orf19.5826			Uncharacterized	Predicted ORF in Assemblies 19, 20 and 21
orf19.5927	RPS15	RPS15	Uncharacterized	Putative ribosomal protein; macrophage/pseudohyphal-induced after 16 h; genes encoding cytoplasmic ribosomal subunits, translation factors, and tRNA synthetases are downregulated upon phagocytosis by murine macrophage
orf19.5995	MCA1	MCA1	Verified	Putative cysteine protease with similarity to S. cerevisiae Mca1p; has a role in apoptotic cell death upon H2O2 treatment; fungal-specific (no human or murine homolog); farnesol-induced
orf19.6135.1	SMX4	LSM3	Uncharacterized	ORF Predicted by Annotation Working Group; flucytosine induced
orf19.6247		CTF4	Uncharacterized	Predicted ORF in Assemblies 19, 20 and 21
orf19.6348			Uncharacterized	Protein not essential for viability
orf19.6360		CWC15	Uncharacterized	Predicted ORF in Assemblies 19, 20 and 21
orf19.6417	TSR1	TSR1	Uncharacterized	Predicted ORF in Assemblies 19, 20 and 21; decreased expression in response to prostaglandins
orf19.6440		ASI1	Uncharacterized	Predicted ORF in Assemblies 19, 20 and 21
orf19.6623		ELF1	Uncharacterized	Predicted ORF in Assemblies 19, 20 and 21
orf19.6676			Uncharacterized	Predicted ORF in Assemblies 19, 20 and 21
orf19.6800	POS5	POS5	Uncharacterized	Protein likely to be essential for growth, based on an insertional mutagenesis strategy; similar to S. cerevisiae Pos5p, which is a mitochondrial NADH kinase involved in the oxidative stress response
orf19.6805			Uncharacterized	Predicted ORF in Assemblies 19, 20 and 21
orf19.6908		FOL3	Uncharacterized	Predicted ORF in Assemblies 19, 20 and 21
orf19.7111.1	SOD3		Verified	Cytosolic manganese-containing superoxide dismutase, involved in protection against oxidative stress; transcription downregulated by treatment with ciclopirox olamine, induced during stationary phase when SOD1 expression is repressed
orf19.7236	TIF35	TIF35	Uncharacterized	Putative translation initiation factor; genes encoding ribosomal subunits, translation factors, and tRNA synthetases are downregulated upon phagocytosis by murine macrophage
orf19.736		SRB8	Uncharacterized	Predicted ORF in Assemblies 19, 20 and 21
orf19.7409	ERV25	ERV25	Verified	Transcription is induced upon filamentous growth
orf19.7453			Uncharacterized	Predicted ORF in Assemblies 19, 20 and 21; possibly spurious ORF (Annotation Working Group prediction)
orf19.7615		TRS31	Uncharacterized	Predicted ORF in Assemblies 19, 20 and 21
orf19.949			Uncharacterized	Predicted ORF in Assemblies 19, 20 and 21
orf19.992	LKH1	LAP2	Uncharacterized	Protein repressed during the mating process; Hog1p-induced
